# Supplementary material
Source: PubMed Central journal article supplement (PMC4962794)
Supplement: ol5b02692_si_007.pdf [file ol5b02692_si_007.pdf]

## SUPPORTING INFORMATION

### SILVER-CATALYZED ENANTIOSELECTIVE PROPARGYLATION

#### REACTIONS OF *N*-SULFONYL KETIMINES

Charlotte A. Osborne, Thomas B. D. Endean, and Elizabeth R. Jarvo\*

*Department of Chemistry, University of California, Irvine, Irvine, CA 92697*

|            |                                                          |             |
|------------|----------------------------------------------------------|-------------|
| <b>I.</b>  | <b>GENERAL PROCEDURES</b>                                | <b>SI-3</b> |
| <b>II.</b> | <b>EXPERIMENTAL</b>                                      | <b>SI-5</b> |
|            | A. STEREOCHEMICAL PROOFS                                 | SI-5        |
|            | B. REPRESENTATIVE ADDITION PROCEDURES                    | SI-7        |
|            | <u>METHOD A:</u> ENANTIOSELECTIVE ADDITION TO KETIMINES  | SI-7        |
|            | <u>METHOD B:</u> RACEMIC STANDARDS                       | SI-7        |
|            | C. CHARACTERIZATION DATA FOR PRODUCTS                    | SI-9        |
|            | D. GENERAL PROCEDURES FOR STARTING MATERIAL SYNTHESIS    | SI-17       |
|            | <u>METHOD C:</u> GRIGNARD ADDITION INTO SACCHARIN        | SI-17       |
|            | <u>METHOD D:</u> ORGANOLITHIUM ADDITION INTO SACCHARIN   | SI-17       |
|            | <u>METHOD E:</u> CHLOROSULFONYL ISOCYANATE CONDENSATION  | SI-18       |
|            | E. CHARACTERIZATION DATA FOR STARTING MATERIALS          | SI-19       |
|            | F. SYNTHETIC TRANSFORMATIONS OF HOMOPROPARGYLIC SULTAMS  |             |
|            | (SCHEME 3)                                               | SI-25       |
|            | 1) ENYNE RING-CLOSING METATHESIS TO FORM <b>6</b>        | SI-25       |
|            | 2) SONOGASHIRA CROSS-COUPPLING REACTION TO FORM <b>7</b> | SI-25       |
|            | 3) LINDLAR REDUCTION TO FORM <b>8</b>                    | SI-26       |
|            | 4) Pd/C REDUCTION TO FORM <b>9</b>                       | SI-27       |
|            | G. MECHANISTIC STUDIES (TABLE 2)                         | SI-28       |
|            | 1) SYNTHESIS OF PROPARGYL BOROLANE REAGENT <b>12</b>     | SI-28       |

|                                                                                   |               |
|-----------------------------------------------------------------------------------|---------------|
| 2) CONTROL REACTIONS WITH <b>12</b>                                               | <b>SI-30</b>  |
| i) ISOMERIZATION IN PRESENCE OF 8 MOL % BASE                                      | <b>SI-30</b>  |
| ii) ISOMERIZATION IN PRESENCE OF 20 MOL % BASE                                    | <b>SI-32</b>  |
| 3) MECHANISTIC STUDIES WITH BOROLANE REAGENTS                                     | <b>SI-34</b>  |
| i) REACTION USING ALLENYL BOROLANE <b>2</b>                                       | <b>SI-34</b>  |
| ii) REACTION USING PROPARGYL BOROLANE <b>12</b>                                   | <b>SI-36</b>  |
| <b>III. REFERENCES FOR SUPPORTING INFORMATION</b>                                 | <b>SI-38</b>  |
| <b>IV. CRYSTALLOGRAPHIC DATA</b>                                                  | <b>SI-39</b>  |
| A. COMPOUND ( <i>S</i> )- <b>3A</b>                                               | <b>SI-39</b>  |
| B. COMPOUND ( <i>R</i> )- <b>3F</b>                                               | <b>SI-54</b>  |
| C. COMPOUND ( <i>R</i> )- <b>3H</b>                                               | <b>SI-65</b>  |
| D. COMPOUND ( <i>R</i> )- <b>5B</b>                                               | <b>SI-76</b>  |
| E. COMPOUND ( <i>R</i> )- <b>5C</b>                                               | <b>SI-90</b>  |
| <b>V. <sup>1</sup>H AND <sup>13</sup>C NMR SPECTRA</b>                            | <b>SI-100</b> |
| <b>VI. SFC TRACES</b>                                                             | <b>SI-174</b> |
| A. SFC TRACES FOR MECHANISTIC STUDIES WITH <b>2</b> OR <b>12</b> (SECTION II-G-3) | <b>SI-191</b> |

## I. GENERAL PROCEDURES

NMR spectra were recorded on Bruker DRX-400 (400 MHz  $^1\text{H}$ , 100 MHz  $^{13}\text{C}$ , 376.5 MHz  $^{19}\text{F}$ ), GN-500 (500 MHz  $^1\text{H}$ , 125.7 MHz  $^{13}\text{C}$ , 160.2 MHz  $^{11}\text{B}$ ), or CRYO-500 (500 MHz  $^1\text{H}$ , 125.7 MHz  $^{13}\text{C}$ ) spectrometers. Proton chemical shifts are reported in ppm ( $\delta$ ) relative to internal trimethylsilane (TMS,  $\delta$  0.00). Data are reported as follows: chemical shift (multiplicity [singlet (s), broad singlet (br s), doublet (d), apparent doublet (ad), doublet of doublets (dd), doublet of doublets of doublets (ddd), triplet (t), apparent triplet (at), doublet of triplets (dt), triplet of doublets (td), quartet (q), quintet (quint), apparent quintet of doublets (aquinatd), sextet (sext), multiplet (m)], coupling constants [Hz], integration). Carbon chemical shifts are reported in ppm ( $\delta$ ) relative to TMS with the solvent resonance as the internal standard ( $\text{CDCl}_3$ ,  $\delta$  77.16 ppm or  $\text{DMF-}d_7$ ,  $\delta$  163.15 ppm). NMR data were collected at 25 °C. Infrared spectra were obtained on a Thermo Scientific Nicolet iS5 spectrometer with an iD5 ATR tip (neat) and are reported in terms of frequency of absorption ( $\text{cm}^{-1}$ ). Analytical thin-layer chromatography (TLC) was performed using Silica Gel 60Å F254 precoated plates (0.25 mm thickness). Visualization was accomplished by irradiation with a UV lamp and/or staining with *p*-anisaldehyde (PAA) or potassium permanganate ( $\text{KMnO}_4$ ) solutions. Flash chromatography was performed using Silica Gel 60 (170-400 mesh) from Fisher Scientific. Melting points (m.p.) were obtained using a Mel-Temp melting point apparatus and are uncorrected. Optical rotations were measured with a Rudolph Research Analytical Autopol III Automatic Polarimeter. SFC determinations of enantiopurity were performed on a Berger Analytical instrument using a Daicel<sup>TM</sup> Chiralpak® column (OD-H, AD-H, AS-H, or (*R,R*)-Whelk-O); 100 bar, 215 nm, 50 °C). High resolution mass spectrometry was performed by the University of California, Irvine Mass Spectrometry Center.

All reactions were carried out under a  $\text{N}_2$  atmosphere, unless otherwise stated. All glassware was either oven-dried or flame-dried prior to use. *N,N*-Dimethylformamide (DMF), tetrahydrofuran (THF), diethyl ether ( $\text{Et}_2\text{O}$ ), dichloromethane ( $\text{CH}_2\text{Cl}_2$ ), triethylamine (TEA), methanol (MeOH), and *N,N*-dimethylacetamide (DMA) were degassed with argon and then passed through two 4 x 36 inch columns of anhydrous neutral A-2 alumina (8 x 14 mesh; LaRoche Chemicals; activated under a flow of argon at 350 °C for 12 hours) to remove  $\text{H}_2\text{O}$ . Other solvents were purchased “anhydrous” commercially, or were purified as described.

$\text{AgPF}_6$  was purchased as a white powder from Strem, stored in the dark in a glove box under an atmosphere of  $\text{N}_2$ , and discarded upon turning to a brown powder.

(*R,R*)-Walphos W001-1 was purchased from Strem or Acros, stored in a glove box under an atmosphere of  $\text{N}_2$ , and used as received. All other ligands were purchased from Strem or Sigma Aldrich and were stored under  $\text{N}_2$  atmosphere and used as received.

Saccharin was purchased from Sigma Aldrich and used as received. All Grignard reagents were titrated with iodine prior to use.<sup>1</sup> *n*-Butyllithium and methylolithium solutions were purchased from Acros, stored at 4 °C, and titrated prior to use.<sup>2</sup>

*tert*-Butanol was purchased from Fisher and distilled every two weeks over  $\text{CaH}_2$  through a short-path distillation head onto activated 4Å mol sieves.

Allenylboronic acid pinacol ester **2** was prepared according to Yoshida and co-workers<sup>3</sup> and distilled every month.

Propargylboronic acid pinacol ester **12** was prepared according to Fandrick and co-workers (vide infra, Section II-G-1).<sup>4</sup> Ethynylmagnesium bromide was purchased from Sigma Aldrich, stored at 4 °C, and used within one week of opening the bottle.

*N,N*-Dimethylformamide-*d*<sub>7</sub> was purchased from Cambridge Isotope Laboratories and used as received.

All other chemicals were purchased commercially and used as received.

## II. EXPERIMENTAL

### A. STEREOCHEMICAL PROOFS

The absolute configurations of products **3a**, **3f**, **3h**, **5b**, and **5c** were assigned by X-ray crystallographic analysis (Scheme SI-1). The absolute configurations of all other products were assigned by analogy. See Section IV for crystallographic data.

**Scheme SI-1.** Absolute configurations of products determined by X-ray crystallography.

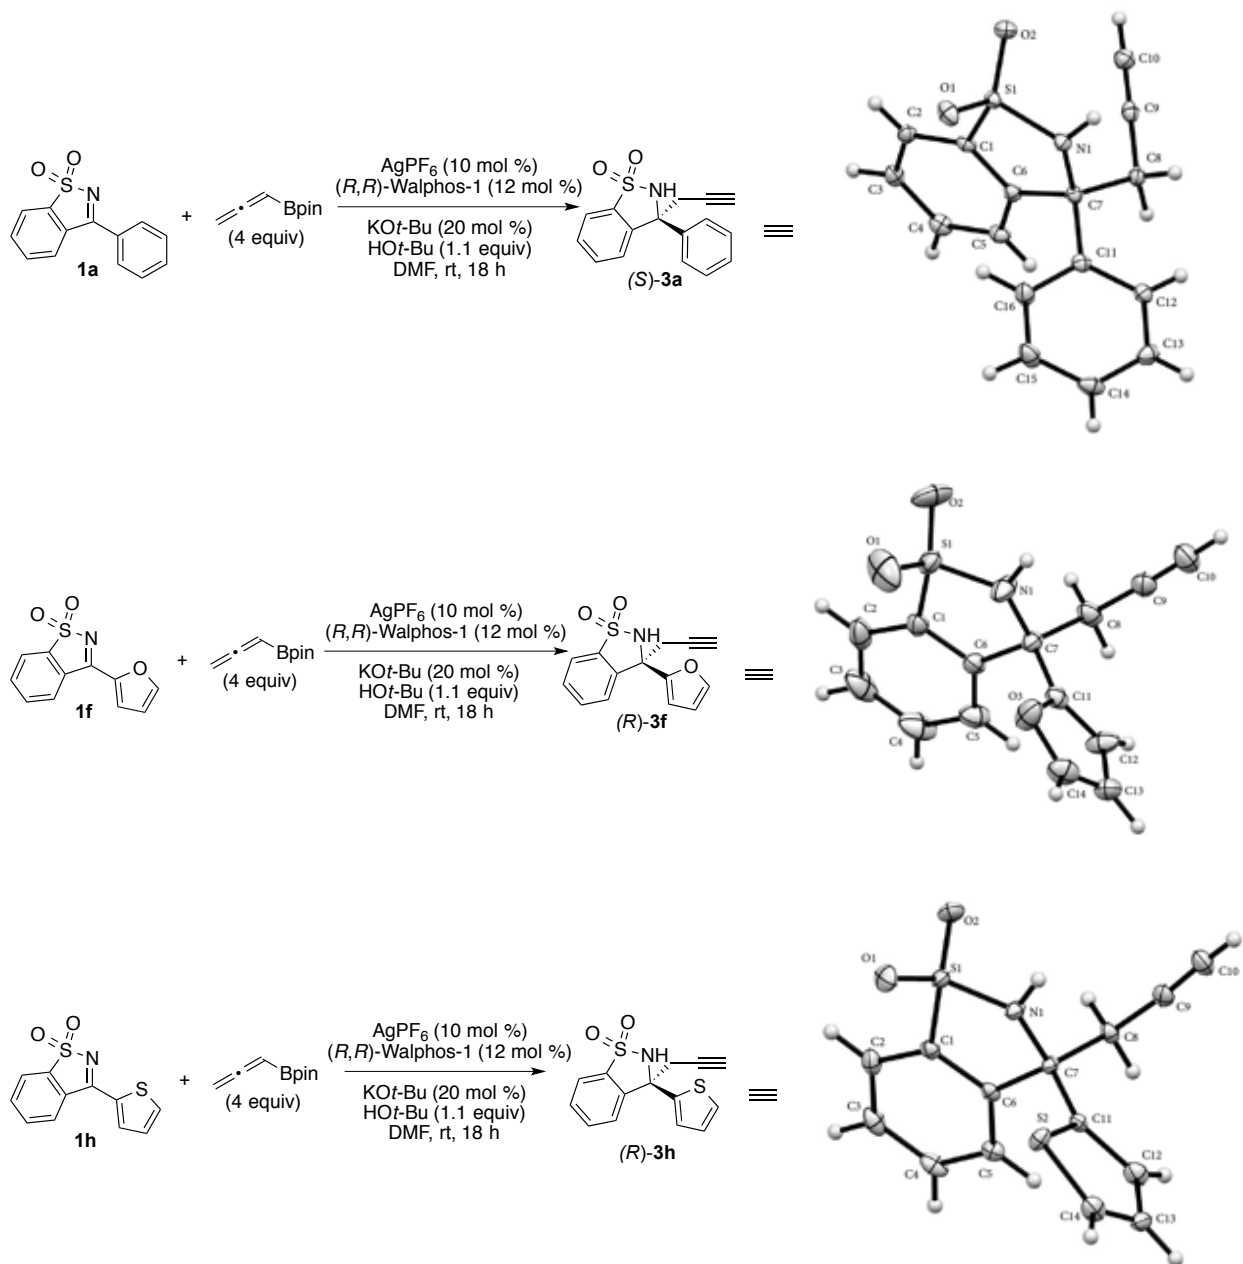

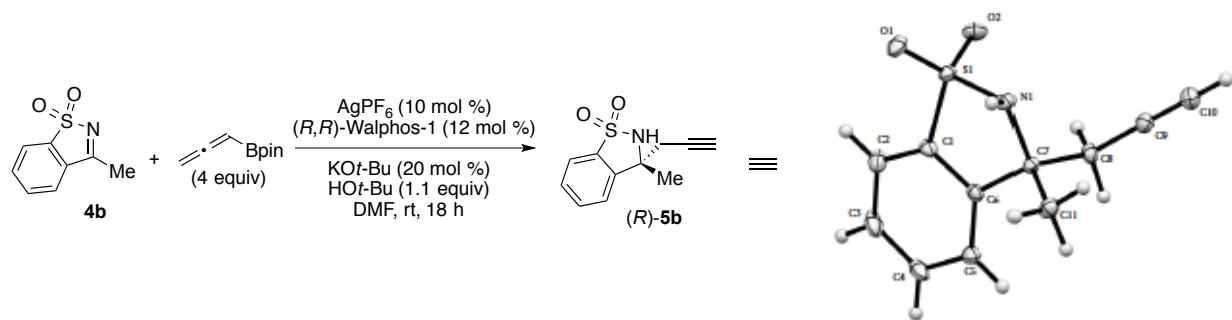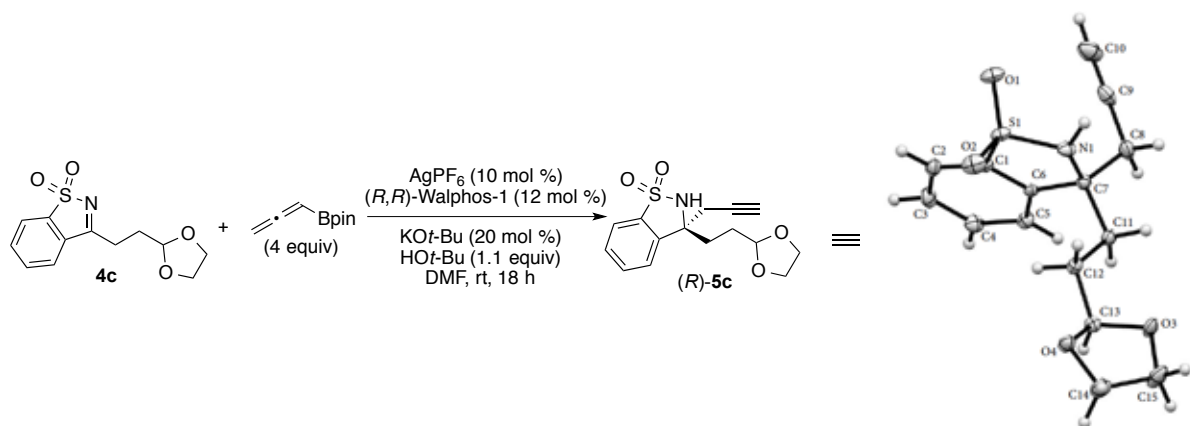

## B. REPRESENTATIVE ADDITION PROCEDURES

### METHOD A: ENANTIOSELECTIVE ADDITION TO KETIMINES

**Note:** All manipulations involving silver-catalyzed reactions were performed in the absence of direct light, using vials wrapped in aluminum foil.

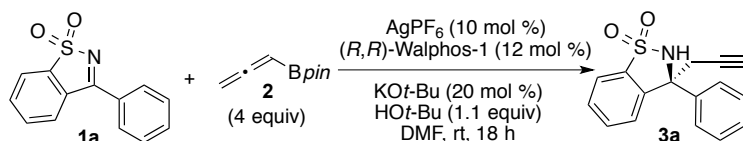

In a glovebox, an oven-dried 1.0 mL conical vial equipped with a triangular stir bar was charged with AgPF<sub>6</sub> (5.0 mg, 0.020 mmol, 0.10 equiv) and Walphos W001-1 (22.3 mg, 0.0240 mmol, 0.120 equiv). The vial was sealed with a screw-top cap fit with a septum and removed from the glovebox. Anhydrous DMF (400 μL) was added and the solution was stirred for 5 min at rt. The N<sub>2</sub> line was then removed and the solution was stirred for 30 min at 70 °C, then cooled to rt over 15 min.

To the catalyst solution was added *tert*-butanol (21 μL, 0.22 mmol, 1.1 equiv), followed by potassium *tert*-butoxide (4.5 mg, 0.040 mmol, 0.20 equiv) and phenyl ketimine **1a** (48.6 mg, 0.200 mmol, 1.00 equiv) under a flow of N<sub>2</sub>. The reaction was stirred at rt for 5 min to dissolve the ketimine. Allenylboronic acid pinacol ester **2** (72 μL, 0.40 mmol, 2.0 equiv) was added via syringe, followed by another portion of allenylboronic acid pinacol ester (72 μL, 0.40 mmol, 2.0 equiv) added via slow addition over 3 h using a syringe pump. The N<sub>2</sub> line was removed and the reaction was stirred at 22 °C for 18 h. The reaction mixture was filtered through a plug of silica gel eluting with 100% Et<sub>2</sub>O to remove the catalyst. Et<sub>2</sub>O was removed in vacuo and the resulting residue was purified by silica gel chromatography.

### METHOD B: RACEMIC STANDARDS

**Note:** All manipulations involving silver-catalyzed reactions were performed in the absence of direct light, using vials wrapped in aluminum foil.

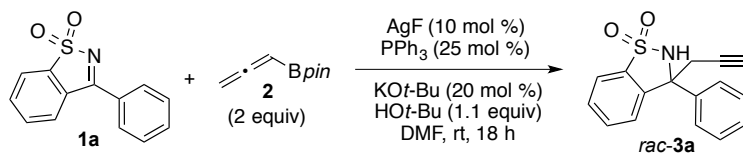

In a glovebox, a flame-dried 7 mL vial equipped with a stir bar was charged with AgF (2.5 mg, 0.020 mmol, 0.10 equiv) and PPh<sub>3</sub> (13 mg, 0.050 mmol, 0.25 equiv). The vial was sealed with a screw-top cap fit with a septum and removed from the glovebox. Anhydrous DMF (800 μL) was added and the solution was stirred for 5 min at rt. The N<sub>2</sub> line was then removed and the solution was stirred for 30 min at 70 °C, then cooled to rt over 15 min.

To the catalyst solution was added *tert*-butanol (21  $\mu$ L, 0.22 mmol, 1.1 equiv), followed by potassium *tert*-butoxide (4.5 mg, 0.040 mmol, 0.20 equiv) and phenyl ketimine **1a** (48.6 mg, 0.200 mmol, 1.00 equiv) under a flow of N<sub>2</sub>. The reaction was stirred at rt for 5 min to dissolve the ketimine. Allenylboronic acid pinacol ester **2** (72  $\mu$ L, 0.40 mmol, 2.0 equiv) was added via syringe. The N<sub>2</sub> line was removed and the reaction was stirred at 22 °C for 18 h. The reaction mixture was filtered through a plug of silica gel eluting with 100% Et<sub>2</sub>O to remove the catalyst. Et<sub>2</sub>O was removed in vacuo and the resulting residue was purified by silica gel chromatography.



### C. CHARACTERIZATION DATA FOR PRODUCTS

**Note:** The yield of homoallenyllic sultam is typically less than 5–10% in these reactions and can be separated from the homopropargylic sultam using the column chromatography conditions specified below. The TLC  $R_f$  of the homoallenyllic sultam is generally 0.1 higher than the  $R_f$  of the homopropargylic sultam. The diagnostic peaks for the homoallenyllic sultam are found in the  $^1\text{H}$  NMR range of  $\delta$  5.96 to 5.48 (t,  $J = 6.6$  Hz, 1H) and  $\delta$  5.11 to 5.01 (d,  $J = 6.6$  Hz, 2H).

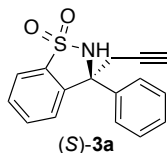

**Sultam (S)-3a** was prepared according to Method A, using the following amounts of reagents:  $\text{AgPF}_6$  (5.0 mg, 0.020 mmol, 0.10 equiv), Walphos W001-1 (22.3 mg, 0.0240 mmol, 0.120 equiv), *tert*-butanol (21  $\mu\text{L}$ , 0.22 mmol, 1.1 equiv), potassium *tert*-butoxide (4.5 mg, 0.040 mmol, 0.20 equiv), substrate **1a** (48.6 mg, 0.200 mmol, 1.00 equiv), DMF (400  $\mu\text{L}$ ), and allenylboronic acid pinacol ester (144  $\mu\text{L}$ , 0.800 mmol, 4.00 equiv). The resulting mixture was purified by flash column chromatography using 0–1% TEA/benzene to separate product from unreacted starting material. The mixture was purified again by flash column chromatography using 5–10–20% EtOAc/hexanes (1% TEA) to separate product from excess ligand and afford the title compound as a white solid (43.6 mg, 0.152 mmol, 76%, 99:1 er). **TLC**  $R_f = 0.2$  (20% EtOAc/hexanes, stains pink with PAA); **m.p.** = 139–142  $^\circ\text{C}$ ;  $^1\text{H}$  NMR (500 MHz,  $\text{CDCl}_3$ )  $\delta$  7.80 (ad,  $J = 7.3$  Hz, 1H), 7.62–7.53 (m, 4H), 7.41–7.30 (m, 4H), 5.23 (br s, 1H), 3.30 (dd,  $J = 17.2, 2.6$  Hz, 1H), 3.24 (dd,  $J = 17.2, 2.6$  Hz, 1H), 2.06 (t,  $J = 2.6$  Hz, 1H);  $^{13}\text{C}$  NMR (125 MHz,  $\text{CDCl}_3$ )  $\delta$  142.3, 140.4, 135.0, 133.5, 130.0, 129.1, 128.7, 126.6, 125.0, 121.5, 78.5, 73.3, 67.1, 31.3; **IR** (neat) 3286, 2923, 1713, 1293, 1165  $\text{cm}^{-1}$ ; **HRMS** (TOF MS ES+)  $m/z$  calcd for  $\text{C}_{16}\text{H}_{13}\text{NO}_2\text{S}$  ( $M + \text{Na}$ ) $^+$  306.0565, found 306.0564;  $[\alpha]_D^{24} +42$  ( $c$  0.7,  $\text{CHCl}_3$ ); **SFC** analysis (OD-H, 10% IPA, 3.0 mL/min, 215 nm) indicated 99:1 er:  $t_R$  (minor) = 11.5 min,  $t_R$  (major) = 14.3 min.

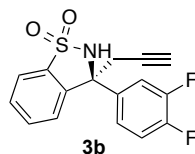

**Sultam 3b** was prepared according to Method A, using the following amounts of reagents:  $\text{AgPF}_6$  (5.0 mg, 0.020 mmol, 0.10 equiv), Walphos W001-1 (22.3 mg, 0.0240 mmol, 0.120 equiv), *tert*-butanol (21  $\mu\text{L}$ , 0.22 mmol, 1.1 equiv), potassium *tert*-butoxide (4.5 mg, 0.040 mmol, 0.20 equiv), substrate **1b** (55.9 mg, 0.200 mmol, 1.00 equiv), DMF (400  $\mu\text{L}$ ), and allenylboronic acid pinacol ester (144  $\mu\text{L}$ , 0.800 mmol, 4.00 equiv). The resulting mixture was purified by flash column chromatography using 0–1% TEA/benzene to separate product from unreacted starting material. The mixture was purified again by flash column chromatography using 5–10–20% EtOAc/hexanes (1% TEA) to separate product from excess ligand and afford the title compound as a pale yellow oil (50.5 mg, 0.158 mmol, 79%, 97:3 er). **TLC**  $R_f = 0.2$

(20% EtOAc/hexanes, stains pink with PAA);  $^1\text{H NMR}$  (500 MHz,  $\text{CDCl}_3$ )  $\delta$  7.81 (d,  $J = 7.7$  Hz, 1H), 7.64 (t,  $J = 7.6$  Hz, 1H), 7.60 (t,  $J = 7.6$  Hz, 1H), 7.42 (ddd,  $J = 11.6, 7.5, 2.5$  Hz, 1H), 7.37–7.37 (d,  $J = 7.7$  Hz, 1H), 7.34–7.30 (m, 1H), 7.17 (q,  $J = 8.8$  Hz, 1H), 5.35 (br s, 1H), 3.25 (dd,  $J = 17.4, 2.5$  Hz, 1H), 3.18 (dd,  $J = 17.4, 2.5$  Hz, 1H), 2.10 (t,  $J = 2.5$  Hz, 1H);  $^{13}\text{C NMR}$  (125 MHz,  $\text{CDCl}_3$ )  $\delta$  151.3 (dd,  $J = 12.5, 7.6$  Hz), 149.4 (dd,  $J = 13.0, 9.0$  Hz), 141.4, 137.5 (t,  $J = 4.2$  Hz), 134.9, 133.6, 130.2, 124.4, 122.8 (dd,  $J = 6.5, 3.7$  Hz), 121.6, 117.7 (d,  $J = 17.6$  Hz), 116.3 (d,  $J = 19.0$  Hz), 77.6, 73.8, 66.1, 31.5;  $^{19}\text{F NMR}$  (376.5 MHz,  $\text{CDCl}_3$ )  $\delta$  -135.8 (m), -137.7 (m); **IR** (neat) 3281, 2923, 2359, 1518, 1284, 1167  $\text{cm}^{-1}$ ; **HRMS** (TOF MS ES+)  $m/z$  calcd for  $\text{C}_{16}\text{H}_{11}\text{F}_2\text{NO}_2\text{S}$  ( $\text{M} + \text{Na}$ ) $^+$  342.0376, found 342.0372;  $[\alpha]_D^{25} +56$  ( $c$  0.8,  $\text{CHCl}_3$ ); **SFC** analysis (OD-H, 10% IPA, 3.0 mL/min, 215 nm) indicated 97:3 er:  $t_R$  (major) = 8.2 min,  $t_R$  (minor) = 11.7 min.

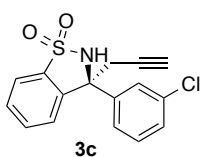

**Sultam 3c** was prepared according to Method A, using the following amounts of reagents:  $\text{AgPF}_6$  (5.0 mg, 0.020 mmol, 0.10 equiv), Walphos W001-1 (22.3 mg, 0.0240 mmol, 0.120 equiv), *tert*-butanol (21  $\mu\text{L}$ , 0.22 mmol, 1.1 equiv), potassium *tert*-butoxide (4.5 mg, 0.040 mmol, 0.20 equiv), substrate **1c** (55.5 mg, 0.200 mmol, 1.00 equiv), DMF (400  $\mu\text{L}$ ), and allenylboronic acid pinacol ester (144  $\mu\text{L}$ , 0.800 mmol, 4.00 equiv). The resulting mixture was purified by flash column chromatography using 0–1% TEA/benzene to separate product from unreacted starting material. The mixture was purified again by flash column chromatography using 5–10–20% EtOAc/hexanes (1% TEA) to separate product from excess ligand and afford the title compound as a clear oil (53.6 mg, 0.168 mmol, 84%, 97:3 er). **TLC**  $R_f = 0.3$  (20% EtOAc/hexanes, stains pink with PAA);  $^1\text{H NMR}$  (500 MHz,  $\text{CDCl}_3$ )  $\delta$  7.81 (d,  $J = 7.4$  Hz, 1H), 7.66–7.54 (m, 3H) 7.48–7.44 (m, 1H), 7.37 (d,  $J = 7.8$  Hz, 1H), 7.35–7.29 (m, 2H), 5.30 (br s, 1H), 3.27 (dd,  $J = 17.4, 2.5$  Hz, 1H), 3.20 (dd,  $J = 17.4, 2.5$  Hz, 1H), 2.09 (t,  $J = 2.5$  Hz, 1H);  $^{13}\text{C NMR}$  (125 MHz,  $\text{CDCl}_3$ )  $\delta$  142.4, 141.5, 134.95, 134.86, 133.5, 130.3, 130.1, 128.8, 126.8, 124.8, 124.6, 121.5, 77.8, 73.6, 66.5, 31.36; **IR** (neat) 3292, 2923, 2359, 1295, 1165  $\text{cm}^{-1}$ ; **HRMS** (TOF MS ES+)  $m/z$  calcd for  $\text{C}_{16}\text{H}_{12}\text{ClNO}_2\text{S}$  ( $\text{M} + \text{Na}$ ) $^+$  340.0175, found 340.0183.  $[\alpha]_D^{26} +49$  ( $c$  1.0,  $\text{CHCl}_3$ ); **SFC** analysis (OD-H, 10% MeOH, 3.0 mL/min, 215 nm) indicated 97:3 er:  $t_R$  (minor) = 9.5 min,  $t_R$  (major) = 10.2 min.

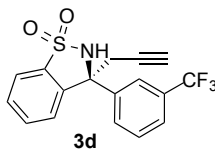

**Sultam 3d** was prepared according to Method A, using the following amounts of reagents:  $\text{AgPF}_6$  (5.0 mg, 0.020 mmol, 0.10 equiv), Walphos W001-1 (22.3 mg, 0.0240 mmol, 0.120 equiv), *tert*-butanol (21  $\mu\text{L}$ , 0.22 mmol, 1.1 equiv), potassium *tert*-butoxide (4.5 mg, 0.040 mmol, 0.20 equiv), substrate **1d** (62.3 mg, 0.200 mmol, 1.00 equiv), DMF (400  $\mu\text{L}$ ), and allenylboronic acid pinacol ester (144  $\mu\text{L}$ , 0.800 mmol, 4.00 equiv). The resulting mixture was purified by flash column chromatography using 0–1% TEA/benzene to separate product from

unreacted starting material. The mixture was purified again by flash column chromatography using 5–10–20% EtOAc/hexanes (1% TEA) to separate product from excess ligand and afford the title compound as a beige solid (49.8 mg, 0.142 mmol, 71%, 98:2 er). **TLC**  $R_f$  = 0.1 (20% EtOAc/hexanes, stains pink with PAA); **m.p.** = 125–127 °C;  **$^1\text{H NMR}$**  (400 MHz,  $\text{CDCl}_3$ )  $\delta$  7.85–7.82 (m, 2H), 7.78 (d,  $J$  = 7.9 Hz, 1H), 7.70–7.58 (m, 3H), 7.52 (t,  $J$  = 7.9 Hz, 1H), 7.37 (d,  $J$  = 7.9 Hz, 1H), 5.35 (br s, 1H), 3.32 (dd,  $J$  = 17.3, 2.7 Hz, 1H), 3.24 (dd,  $J$  = 17.3, 2.7 Hz, 1H), 2.10 (t,  $J$  = 2.7 Hz, 1H);  **$^{13}\text{C NMR}$**  (125.7 MHz,  $\text{CDCl}_3$ )  $\delta$  141.6, 141.5, 135.1, 133.8, 131.4 (q,  $J$  = 32.4 Hz), 130.4, 130.3, 129.8, 125.6 (q,  $J$  = 3.7 Hz), 124.6, 123.9 (q,  $J$  = 272.4 Hz), 123.3 (q,  $J$  = 4.0 Hz), 121.8, 77.7, 73.9, 66.7, 31.5;  **$^{19}\text{F NMR}$**  (376.5 MHz,  $\text{CDCl}_3$ )  $\delta$  –62.6; **IR** (neat) 3302, 1329, 1164, 1125, 731  $\text{cm}^{-1}$ ; **HRMS** (TOF MS ES+)  $m/z$  calcd for  $\text{C}_{17}\text{H}_{12}\text{F}_3\text{NO}_2\text{S}$  ( $\text{M} + \text{Na}$ )<sup>+</sup> 374.0439, found 374.0433;  **$[\alpha]_D^{26}$**  +47 ( $c$  1.2,  $\text{CDCl}_3$ ); **SFC** analysis (Whelk-O (*R,R*), 5% IPA, 3.0 mL/min, 215 nm) indicated 98:2 er:  $t_R$  (minor) = 10.8 min,  $t_R$  (major) = 11.3 min.

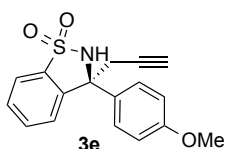

**Sultam 3e** was prepared according to Method A, using the following amounts of reagents:  $\text{AgPF}_6$  (5.0 mg, 0.020 mmol, 0.10 equiv), Walphos W001-1 (22.3 mg, 0.0240 mmol, 0.120 equiv), *tert*-butanol (21  $\mu\text{L}$ , 0.22 mmol, 1.1 equiv), potassium *tert*-butoxide (4.5 mg, 0.040 mmol, 0.20 equiv), substrate **1e** (54.7 mg, 0.200 mmol, 1.00 equiv), DMF (400  $\mu\text{L}$ ), and allenylboronic acid pincol ester (216  $\mu\text{L}$ , 0.800 mmol, 6.00 equiv). The resulting mixture was purified by flash column chromatography using 0–1% TEA/benzene to separate product from unreacted starting material. The mixture was purified again by flash column chromatography using 5–10–20% EtOAc/hexanes (1% TEA) to separate product from excess ligand and afford the title compound as a clear oil (39.0 mg, 0.124 mmol, 62%, 99:1 er). **TLC**  $R_f$  = 0.1 (20% EtOAc/hexanes, stains purple with PAA);  **$^1\text{H NMR}$**  (500 MHz,  $\text{CDCl}_3$ )  $\delta$  7.81 (d,  $J$  = 7.7 Hz, 1H), 7.60 (t,  $J$  = 7.2 Hz, 1H), 7.56 (t,  $J$  = 7.6 Hz, 1H), 7.44 (d,  $J$  = 8.7 Hz, 2H), 7.35 (d,  $J$  = 7.7 Hz, 1H), 6.89 (d,  $J$  = 8.8, 2H), 5.12 (br s, 1H), 3.80 (s, 3H), 3.29–3.20 (m, 2H), 2.07 (t,  $J$  = 2.5 Hz, 1H);  **$^{13}\text{C NMR}$**  (125 MHz,  $\text{CDCl}_3$ )  $\delta$  159.8, 142.9, 135.1, 133.4, 132.3, 129.9, 128.1, 125.0, 121.4, 114.4, 78.7, 73.2, 66.8, 55.5, 31.4; **IR** (neat) 3272, 2923, 1512, 1293, 1164  $\text{cm}^{-1}$ ; **HRMS** (TOF MS ES+)  $m/z$  calcd for  $\text{C}_{17}\text{H}_{15}\text{NO}_3\text{S}$  ( $\text{M} + \text{Na}$ )<sup>+</sup> 336.0670, found 336.0663;  **$[\alpha]_D^{24}$**  +33 ( $c$  0.5,  $\text{CHCl}_3$ ); **SFC** analysis (OD-H, 10% IPA, 3.0 mL/min, 215 nm) indicated 99:1 er:  $t_R$  (major) = 16.1 min,  $t_R$  (minor) = 21.4 min.

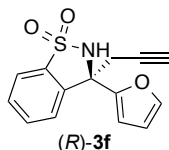

**Sultam (R)-3f** was prepared according to Method A, using the following amounts of reagents:  $\text{AgPF}_6$  (5.0 mg, 0.020 mmol, 0.10 equiv), Walphos W001-1 (22.3 mg, 0.0240 mmol, 0.120 equiv), *tert*-butanol (21  $\mu\text{L}$ , 0.22 mmol, 1.1 equiv), potassium *tert*-butoxide (4.5 mg, 0.040 mmol, 0.20 equiv), substrate **1f** (46.6 mg, 0.200 mmol, 1.00 equiv), DMF (400  $\mu\text{L}$ ), and

allenylboronic acid pincol ester (144  $\mu$ L, 0.800 mmol, 4.00 equiv). The resulting mixture was purified by flash column chromatography using 0–1% TEA/benzene to separate product from unreacted starting material. The mixture was purified again by flash column chromatography using 5–20–40% EtOAc/hexanes (1% TEA) to separate product from excess ligand and afford the title compound as a white solid (35.4 mg, 0.130 mmol, 65%, 97:3 er). **TLC**  $R_f$  = 0.3 (20% EtOAc/hexanes, stains purple with PAA); **m.p.** = 126–127  $^{\circ}$ C;  **$^1$ H NMR** (500 MHz,  $CDCl_3$ )  $\delta$  7.80 (d,  $J$  = 7.6 Hz, 1H), 7.66 (td,  $J$  = 7.6, 1.1 Hz, 1H), 7.60–7.58 (m, 2H), 7.40 (d,  $J$  = 1.1 Hz, 1H), 6.48 (d,  $J$  = 3.3 Hz, 1H), 6.35 (dd,  $J$  = 3.3, 1.8 Hz, 1H), 5.29 (br s, 1H), 3.25 (dd,  $J$  = 17.0, 2.6 Hz, 1H), 3.19 (dd,  $J$  = 17.0, 2.6 Hz, 1H), 2.07 (t,  $J$  = 2.6 Hz, 1H);  **$^{13}$ C NMR** (125.7 MHz,  $CDCl_3$ )  $\delta$  152.1, 143.6, 139.7, 135.2, 133.5, 130.4, 124.8, 121.5, 110.8, 108.8, 77.8, 73.1, 63.3, 30.6; **IR** (neat) 3283, 1295, 1166, 1132, 735  $cm^{-1}$ ; **HRMS** (TOF MS ES+)  $m/z$  calcd for  $C_{14}H_{11}NO_3S$  (M + Na) $^+$  296.0357, found 296.0363;  **$[\alpha]_D^{26}$**  +7.0 ( $c$  1.0,  $CDCl_3$ ); **SFC** analysis (OD-H, 10% IPA, 3.0 mL/min, 215 nm) indicated 97:3 er:  $t_R$  (minor) = 7.2 min,  $t_R$  (major) = 8.6 min.

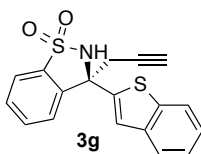

**Sultam 3g** was prepared according to Method A, using the following amounts of reagents:  $AgPF_6$  (5.0 mg, 0.020 mmol, 0.10 equiv), Walphos W001-1 (22.3 mg, 0.0240 mmol, 0.120 equiv), *tert*-butanol (21  $\mu$ L, 0.22 mmol, 1.1 equiv), potassium *tert*-butoxide (4.5 mg, 0.040 mmol, 0.20 equiv), substrate **1g** (59.9 mg, 0.200 mmol, 1.00 equiv), DMF (400  $\mu$ L), and allenylboronic acid pincol ester (144  $\mu$ L, 0.800 mmol, 4.00 equiv). The resulting mixture was purified by flash column chromatography using 0–1% TEA/benzene to separate product from unreacted starting material. The mixture was purified again by flash column chromatography using 5–10–20% EtOAc/hexanes (1% TEA) to separate product from excess ligand and afford the title compound as a pale yellow oil (46.7 mg, 0.138 mmol, 69%, 95:5 er). **TLC**  $R_f$  = 0.3 (20% EtOAc/hexanes, stains purple with PAA);  **$^1$ H NMR** (500 MHz,  $CDCl_3$ )  $\delta$  7.83 (d,  $J$  = 7.8 Hz, 1H), 7.77–7.73 (m, 2H), 7.67 (td,  $J$  = 7.6, 1.1 Hz, 1H), 7.62–7.56 (m, 2H), 7.45 (s, 1H), 7.34 (aquintd,  $J$  = 7.5, 1.4 Hz, 2H), 5.44 (s, 1H), 3.36 (dd,  $J$  = 17.1, 2.7 Hz, 1H), 3.29 (dd,  $J$  = 17.1, 2.7 Hz, 1H), 2.12 (t,  $J$  = 2.7 Hz, 1H);  **$^{13}$ C NMR** (125.7 MHz,  $CDCl_3$ )  $\delta$  145.5, 141.0, 139.9, 139.3, 134.9, 133.7, 130.5, 125.3, 124.9, 124.8, 124.3, 123.0, 122.5, 121.7, 77.8, 73.8, 65.4, 32.8; **IR** (neat) 3288, 1294, 1166, 1131, 726  $cm^{-1}$ ; **HRMS** (TOF MS ES+)  $m/z$  calcd for  $C_{18}H_{13}NO_2S_2$  (M + Na) $^+$  362.0285, found 362.0279;  **$[\alpha]_D^{28}$**  +17 ( $c$  1.1,  $CDCl_3$ ); **SFC** analysis (AS-H, 20% IPA, 3.0 mL/min, 215 nm) indicated 95:5 er:  $t_R$  (major) = 11.0 min,  $t_R$  (minor) = 16.5 min.

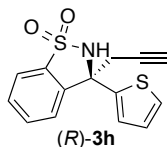

**Sultam (R)-3h** was prepared according to Method A, using the following amounts of reagents:  $AgPF_6$  (5.0 mg, 0.020 mmol, 0.10 equiv), Walphos W001-1 (22.3 mg, 0.0240 mmol, 0.120

equiv), *tert*-butanol (21  $\mu$ L, 0.22 mmol, 1.1 equiv), potassium *tert*-butoxide (4.5 mg, 0.040 mmol, 0.20 equiv), substrate **1h** (49.9 mg, 0.200 mmol, 1.00 equiv), DMF (400  $\mu$ L), and allenylboronic acid pinacol ester (144  $\mu$ L, 0.800 mmol, 4.00 equiv). The resulting mixture was purified by flash column chromatography using 0–1% TEA/benzene to separate product from unreacted starting material. The mixture was purified again by flash column chromatography using 5–10–20% EtOAc/hexanes (1% TEA) to separate product from excess ligand and afford the title compound as a yellow solid (51.3 mg, 0.177 mmol, 89%, 97:3 er). **TLC**  $R_f$  = 0.3 (20% EtOAc/hexanes, stains purple with PAA); **m.p.** = 155–157  $^{\circ}$ C;  **$^1$ H NMR** (500 MHz,  $CDCl_3$ )  $\delta$  7.80 (d,  $J$  = 7.7 Hz, 1H), 7.66 (td,  $J$  = 7.6, 1.3 Hz, 1H), 7.59 (td,  $J$  = 7.5, 1.3 Hz, 1H), 7.54 (d,  $J$  = 7.8 Hz, 1H), 7.30 (dd,  $J$  = 5.1, 1.3 Hz, 1H), 7.18 (dd,  $J$  = 3.7, 1.3 Hz, 1H), 6.98 (dd,  $J$  = 5.1, 3.7 Hz, 1H), 5.34 (br s, 1H), 3.27 (d,  $J$  = 2.6 Hz, 2H), 2.09 (t,  $J$  = 2.6 Hz, 1H);  **$^{13}$ C NMR** (125.7 MHz,  $CDCl_3$ )  $\delta$  145.1, 141.6, 135.0, 133.6, 130.3, 127.4, 126.6, 126.2, 124.8, 121.5, 78.0, 73.5, 65.0, 33.2; **IR** (neat) 3305, 2925, 1302, 1168, 906, 728  $cm^{-1}$ ; **HRMS** (TOF MS ES+)  $m/z$  calcd for  $C_{14}H_{11}NO_2S_2$  ( $M + Na$ ) $^+$  312.0129, found 312.0142;  **$[\alpha]_D^{28}$**  –12 ( $c$  0.9,  $CDCl_3$ ); **SFC** analysis (OD-H, 10% IPA, 3.0 mL/min, 215 nm) indicated 97:3 er:  $t_R$  (minor) = 12.5 min,  $t_R$  (major) = 15.7 min.

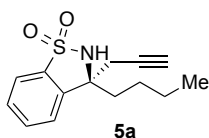

**Sultam 5a** was prepared according to Method A, using the following amounts of reagents:  $AgPF_6$  (5.0 mg, 0.020 mmol, 0.10 equiv), Walphos W001-1 (22.3 mg, 0.0240 mmol, 0.120 equiv), *tert*-butanol (21  $\mu$ L, 0.22 mmol, 1.1 equiv), potassium *tert*-butoxide (4.5 mg, 0.040 mmol, 0.20 equiv), substrate **4a** (44.7 mg, 0.200 mmol, 1.00 equiv), DMF (400  $\mu$ L), and allenylboronic acid pinacol ester (144  $\mu$ L, 0.800 mmol, 4.00 equiv). The resulting mixture was purified by flash column chromatography using 0–1% TEA/benzene to separate product from unreacted starting material. The mixture was purified again by flash column chromatography using 5–10% EtOAc/hexanes (1% TEA) to separate product from excess ligand and afford the title compound as a colorless oil (44.3 mg, 0.168 mmol, 84%, 99:1 er). **TLC**  $R_f$  = 0.6 (20% EtOAc/hexanes, stains pink with PAA);  **$^1$ H NMR** (500 MHz,  $CDCl_3$ )  $\delta$  7.77 (d,  $J$  = 7.8 Hz, 1H), 7.65 (t,  $J$  = 7.6, 1.0 Hz, 1H), 7.56 (t,  $J$  = 7.7, 0.9 Hz, 1H), 7.49 (d,  $J$  = 7.8 Hz, 1H), 4.87 (s, 1H), 2.82 (dd,  $J$  = 16.9, 2.7 Hz, 1H), 2.77 (dd,  $J$  = 16.9, 2.7 Hz, 1H), 2.13 (t,  $J$  = 2.7 Hz, 1H), 2.14–2.08 (m, 1H), 2.02–1.96 (m, 1H), 1.45–1.35 (m, 1H), 1.34–1.24 (m, 2H), 1.04–0.96 (m, 1H), 0.86 (t,  $J$  = 7.3 Hz, 3H);  **$^{13}$ C NMR** (125.7 MHz,  $CDCl_3$ )  $\delta$  141.9, 135.8, 133.4, 129.8, 123.6, 121.6, 78.8, 72.8, 65.2, 38.5, 31.8, 25.8, 22.7, 14.0; **IR** (neat) 3306, 2959, 1289, 1168, 907, 728  $cm^{-1}$ ; **HRMS** (TOF MS ES+)  $m/z$  calcd for  $C_{14}H_{17}NO_2S$  ( $M + Na$ ) $^+$  286.0878, found 286.0884;  **$[\alpha]_D^{28}$**  –2.4 ( $c$  1.1,  $CDCl_3$ ); **SFC** analysis (AS-H, 10% IPA, 3.0 mL/min, 215 nm) indicated 99:1 er:  $t_R$  (major) = 7.5 min,  $t_R$  (minor) = 8.3 min.

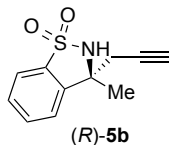

**Sultam (R)-5b** was prepared according to Method A, using the following amounts of reagents: AgPF<sub>6</sub> (5.0 mg, 0.020 mmol, 0.10 equiv), Walphos W001-1 (22.3 mg, 0.0240 mmol, 0.120 equiv), *tert*-butanol (21 μL, 0.22 mmol, 1.1 equiv), potassium *tert*-butoxide (4.5 mg, 0.040 mmol, 0.20 equiv), substrate **4b** (36.2 mg, 0.200 mmol, 1.00 equiv), DMF (400 μL), and allenylboronic acid pinacol ester (144 μL, 0.800 mmol, 4.00 equiv). The resulting mixture was purified by flash column chromatography using 0–1% TEA/benzene to separate product from unreacted starting material. The mixture was purified again by flash column chromatography using 5–10–20% EtOAc/hexanes (1% TEA) to separate product from excess ligand and afford the title compound as a white solid (35.7 mg, 0.161 mmol, 80%, 99:1 er). **TLC** R<sub>f</sub> = 0.3 (20% EtOAc/hexanes, stains pink with PAA); **m.p.** = 91–93 °C; **<sup>1</sup>H NMR** (500 MHz, CDCl<sub>3</sub>) δ 7.77 (d, *J* = 7.8 Hz, 1H), 7.65 (td, *J* = 7.8, 1.1 Hz, 1H), 7.56 (td, *J* = 7.7, 1.0 Hz, 1H), 7.51 (d, *J* = 7.8 Hz, 1H), 4.93 (s, 1H), 2.82 (dd, *J* = 17.0, 2.7 Hz, 1H), 2.77 (dd, *J* = 17.0, 2.7 Hz, 1H), 2.15 (t, *J* = 2.7 Hz, 1H), 1.76 (s, 3H); **<sup>13</sup>C NMR** (125.7 MHz, CDCl<sub>3</sub>) δ 143.3, 135.6, 133.5, 129.8, 123.4, 121.5, 78.8, 72.7, 62.0, 32.6, 26.9; **IR** (neat) 3274, 2980, 2342, 1281, 1156, 1132 cm<sup>-1</sup>; **HRMS** (TOF MS ES<sup>+</sup>) *m/z* calcd for C<sub>11</sub>H<sub>11</sub>NO<sub>2</sub>S (M + Na)<sup>+</sup> 244.0408, found 244.0410; [α]<sub>D</sub><sup>27</sup> +16 (*c* 0.9, CDCl<sub>3</sub>); **SFC** analysis (OD-H, 10% IPA, 3.0 mL/min, 215 nm) indicated 99:1 er: t<sub>R</sub> (minor) = 5.8 min, t<sub>R</sub> (major) = 6.3 min.

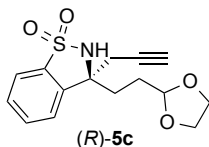

**Sultam (R)-5c** was prepared according to Method A, using the following amounts of reagents: AgPF<sub>6</sub> (5.0 mg, 0.020 mmol, 0.10 equiv), Walphos W001-1 (22.3 mg, 0.0240 mmol, 0.120 equiv), *tert*-butanol (21 μL, 0.22 mmol, 1.1 equiv), potassium *tert*-butoxide (4.5 mg, 0.040 mmol, 0.20 equiv), substrate **4c** (53.5 mg, 0.200 mmol, 1.00 equiv), DMF (400 μL), and allenylboronic acid pinacol ester (144 μL, 0.800 mmol, 4.00 equiv). The resulting mixture was purified by flash column chromatography using 0–1% TEA/benzene to separate product from unreacted starting material. The mixture was purified again by flash column chromatography using 10–20–30% EtOAc/hexanes (1% TEA) to separate product from excess ligand and afford the title compound as a white solid (43.9 mg, 0.143 mmol, 72%, 98:2 er). **TLC** R<sub>f</sub> = 0.2 (20% EtOAc/hexanes, stains yellow then pink with PAA); **m.p.** = 128–129 °C; **<sup>1</sup>H NMR** (500 MHz, CDCl<sub>3</sub>) δ 7.77 (d, *J* = 7.7 Hz, 1H), 7.64 (t, *J* = 7.7 Hz, 1H), 7.57–7.53 (m, 2H), 5.86 (s, 1H), 4.87 (t, *J* = 3.8 Hz, 1H), 4.03–3.95 (m, 2H), 3.91–3.83 (m, 2H), 2.83 (dd, *J* = 17.0, 2.7 Hz, 1H), 2.77 (dd, *J* = 17.0, 2.7 Hz, 1H), 2.33–2.20 (m, 2H), 2.14 (t, *J* = 2.7 Hz, 1H), 1.70–1.63 (m, 1H), 1.62–1.56 (m, 1H); **<sup>13</sup>C NMR** (125.7 MHz, CDCl<sub>3</sub>) δ 141.7, 136.4, 133.3, 129.9, 123.8, 121.5, 103.2, 79.0, 72.7, 65.3, 65.2, 64.6, 32.4, 31.1, 27.5; **IR** (neat) 3269, 2890, 1286, 1164, 1131, 729 cm<sup>-1</sup>; **HRMS** (TOF MS ES<sup>+</sup>) *m/z* calcd for C<sub>15</sub>H<sub>17</sub>NO<sub>4</sub>S (M + Na)<sup>+</sup> 330.0776, found 330.0781; [α]<sub>D</sub><sup>27</sup> –26 (*c* 1.2, CDCl<sub>3</sub>); **SFC** analysis (AS-H, 10% IPA, 3.0 mL/min, 215 nm) indicated 98:2 er: t<sub>R</sub> (major) = 12.4 min, t<sub>R</sub> (minor) = 13.8 min.

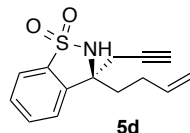

**Sultam 5d** was prepared according to Method A, using the following amounts of reagents: AgPF<sub>6</sub> (5.0 mg, 0.020 mmol, 0.10 equiv), Walphos W001-1 (22.3 mg, 0.0240 mmol, 0.120 equiv), *tert*-butanol (21 μL, 0.22 mmol, 1.1 equiv), potassium *tert*-butoxide (4.5 mg, 0.040 mmol, 0.20 equiv), substrate **4d** (44.3 mg, 0.200 mmol, 1.00 equiv), DMF (400 μL), and allenylboronic acid pinacol ester (144 μL, 0.800 mmol, 4.00 equiv). The resulting mixture was purified by flash column chromatography using 0–1% TEA/benzene to separate product from unreacted starting material. The mixture was purified again by flash column chromatography using 5–10% EtOAc/hexanes (1% TEA) to separate product from excess ligand and afford the title compound as a white solid (46.2 mg, 0.177 mmol, 88%, 98:2 er). **TLC** **R<sub>f</sub>** = 0.4 (20% EtOAc/hexanes, stains pink with PAA); **m.p.** = 80–81 °C; **<sup>1</sup>H NMR** (400 MHz, CDCl<sub>3</sub>) δ 7.78 (d, *J* = 7.8 Hz, 1H), 7.66 (td, *J* = 7.6, 1.3 Hz, 1H), 7.57 (td, *J* = 7.6, 1.0 Hz, 1H), 7.50 (d, *J* = 7.8 Hz, 1H), 5.79–5.69 (m, 1H), 5.02–4.93 (m, 3H), 2.86–2.76 (m, 2H), 2.27–2.16 (m, 2H), 2.15 (t, *J* = 2.6 Hz, 1H), 2.13–2.05 (m, 1H), 1.87–1.76 (m, 1H); **<sup>13</sup>C NMR** (125.7 MHz, CDCl<sub>3</sub>) δ 141.4, 137.0, 135.8, 133.4, 129.9, 123.6, 121.6, 115.7, 78.6, 72.9, 65.0, 37.8, 32.0, 28.0; **IR** (neat) 3273, 1285, 1165, 1131, 730 cm<sup>-1</sup>; **HRMS** (TOF MS ES<sup>+</sup>) *m/z* calcd for C<sub>14</sub>H<sub>15</sub>NO<sub>2</sub>S (M + Na)<sup>+</sup> 284.0721, found 284.0728; **[α]<sub>D</sub><sup>24</sup>** +0.5 (*c* 1.3, CDCl<sub>3</sub>); **SFC** analysis (AS-H, 10% IPA, 3.0 mL/min, 215 nm) indicated 98:2 er: *t<sub>R</sub>* (major) = 7.5 min, *t<sub>R</sub>* (minor) = 8.6 min.

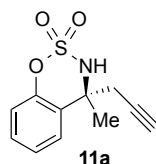

**Sultam 11a** was prepared according to Method A, using the following amounts of reagents: AgPF<sub>6</sub> (5.0 mg, 0.020 mmol, 0.10 equiv), Walphos W001-1 (22.3 mg, 0.0240 mmol, 0.120 equiv), *tert*-butanol (21 μL, 0.22 mmol, 1.1 equiv), potassium *tert*-butoxide (4.5 mg, 0.040 mmol, 0.20 equiv), substrate **10a** (39.4 mg, 0.200 mmol, 1.00 equiv), DMF (400 μL), and allenylboronic acid pinacol ester (144 μL, 0.800 mmol, 4.00 equiv). The resulting mixture was purified by flash column chromatography using 0–1% TEA/benzene to separate product from unreacted starting material. The mixture was purified again by flash column chromatography using 5–10–20% EtOAc/hexanes (1% TEA) to separate product from excess ligand and afford the title compound as a clear oil (36.1 mg, 0.152 mmol, 76%, 99:1 er). **TLC** **R<sub>f</sub>** = 0.5 (20% EtOAc/hexanes, stains pink with PAA); **<sup>1</sup>H NMR** (500 MHz, CDCl<sub>3</sub>) δ 7.33 (td, *J* = 7.7, 2.5 Hz, 1H), 7.27–7.21 (m, 2H), 7.04 (d, *J* = 8.0 Hz, 1H), 4.00 (br s, 1H), 3.04 (dd, *J* = 17.2, 2.5 Hz, 1H), 2.80 (dd, *J* = 17.2, 2.5 Hz, 1H), 2.12 (t, *J* = 2.5 Hz, 1H), 1.81 (s, 3H); **<sup>13</sup>C NMR** (125 MHz, CDCl<sub>3</sub>) δ 150.2, 130.0, 126.5, 125.9, 125.6, 119.5, 78.0, 73.4, 61.8, 33.2, 28.6; **IR** (neat) 3272, 2923, 1512, 1293, 1164 cm<sup>-1</sup>; **HRMS** (TOF MS ES<sup>+</sup>) *m/z* calcd for C<sub>11</sub>H<sub>11</sub>NO<sub>3</sub>S (M + Na)<sup>+</sup> 260.0357, found 260.0356; **[α]<sub>D</sub><sup>26</sup>** +35 (*c* 0.9, CHCl<sub>3</sub>); **SFC** analysis (AD-H, 10% IPA, 3.0 mL/min, 215 nm) indicated 99:1 er: *t<sub>R</sub>* (minor) = 5.4 min, *t<sub>R</sub>* (major) = 6.0 min.

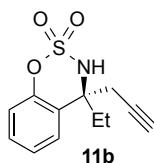

**Sultam 11b** was prepared according to Method A, using the following amounts of reagents: AgPF<sub>6</sub> (5.0 mg, 0.020 mmol, 0.10 equiv), Walphos W001-1 (22.3 mg, 0.0240 mmol, 0.120 equiv), *tert*-butanol (21 μL, 0.22 mmol, 1.1 equiv), potassium *tert*-butoxide (4.5 mg, 0.040 mmol, 0.20 equiv), substrate **10b** (42.2 mg, 0.200 mmol, 1.00 equiv), DMF (400 μL), and allenylboronic acid pinacol ester (144 μL, 0.800 mmol, 4.00 equiv). The resulting mixture was purified by flash column chromatography using 0–1% TEA/benzene to separate product from unreacted starting material. The mixture was purified again by flash column chromatography using 5–10–20% EtOAc/hexanes (1% TEA) to separate product from excess ligand and afford the title compound as a clear oil (25.6 mg, 0.102 mmol, 51%, 99:1 er). **TLC** R<sub>f</sub> = 0.6 (20% EtOAc/hexanes, stains purple with PAA); **<sup>1</sup>H NMR** (500 MHz, CDCl<sub>3</sub>) δ 7.33 (td, *J* = 7.4, 2.4 Hz, 1H), 7.28–7.22 (m, 2H), 7.06 (d, *J* = 8.4 Hz, 1H), 4.71 (br s, 1H), 3.03 (dd, *J* = 17.5, 2.6 Hz, 1H), 2.87 (dd, *J* = 17.9, 3.0 Hz, 1H), 2.22 (sextet, *J* = 7.1 Hz, 1H), 2.11 (t, *J* = 2.5 Hz, 1H), 2.08 (sextet, *J* = 7.2 Hz, 1H), 0.93 (t, *J* = 7.4 Hz, 3H); **<sup>13</sup>C NMR** (125 MHz, CDCl<sub>3</sub>) δ 150.7, 129.9, 126.5, 125.9, 125.0, 119.5, 78.4, 73.3, 64.8, 32.9, 30.9, 7.9; **IR** (neat) 3294, 1485, 1417, 1364 cm<sup>-1</sup>; **HRMS** (TOF MS ES+) *m/z* calcd for C<sub>12</sub>H<sub>13</sub>NO<sub>3</sub>S (M + Na)<sup>+</sup> 274.0514, found 274.0509; **[α]<sub>D</sub><sup>26</sup>** +25 (*c* 0.5, CHCl<sub>3</sub>); **SFC** analysis (AD-H, 10% IPA, 3.0 mL/min, 215 nm) indicated 99:1 er: t<sub>R</sub> (minor) = 4.7 min, t<sub>R</sub> (major) = 5.1 min.



## D. GENERAL PROCEDURES FOR STARTING MATERIAL SYNTHESIS

**Note:** When possible, Method D was preferentially used instead of Method C in order to minimize side reactions and obtain reaction mixtures that were easier to purify. The yields for starting material synthesis are unoptimized.

### METHOD C: GRIGNARD ADDITION INTO SACCHARIN

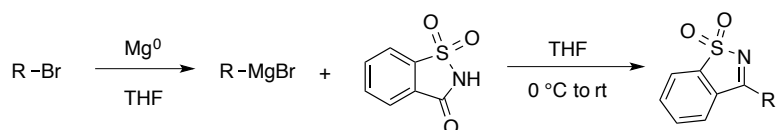

Prepared according to a modified procedure described by Hayashi and co-workers.<sup>5</sup> The Grignard reagent was typically prepared using flame-dried magnesium turnings (2.0 equiv) with a few crystals of I<sub>2</sub> in anhydrous THF (10 mL). The aryl halide (1.0 equiv) was added to the solution until initiation of the Grignard reagent, after which the remaining aryl halide was added dropwise at 0 °C. The reaction was stirred 2 h at rt, then titrated.<sup>1</sup>

The Grignard reagent (2.0 equiv) was then slowly added to a solution of saccharin (1.0 equiv) in THF (6 mL) at 0 °C. The reaction was allowed to warm to rt and stirred at 22 °C overnight. The reaction was quenched at 0 °C with saturated aqueous NH<sub>4</sub>Cl (20 mL) and extracted with EtOAc (3 x 20 mL). The combined organic layers were washed with brine, dried over Na<sub>2</sub>SO<sub>4</sub>, filtered, and concentrated in vacuo. The product was purified either by recrystallization (if the unpurified material was already crystalline) or by flash column chromatography using silica gel (generally, the unpurified material was first adsorbed onto silica).

### METHOD D: ORGANOLITHIUM ADDITION INTO SACCHARIN

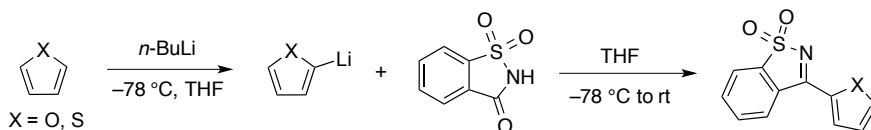

Prepared according to a modified procedure described by Bode and co-workers.<sup>6</sup> The organolithium reagent was typically prepared by slow addition of *n*-butyllithium (2.75 equiv) to a solution of heterocycle (2.5 equiv) in anhydrous THF (10 mL) at -78 °C. The reaction was stirred at -78 °C for 15 min then used directly in the next step.

To this mixture was slowly added a solution of saccharin (1.0 equiv) in THF (6 mL) via syringe at -78 °C. The reaction was allowed to warm to rt slowly over several hours, then stirred at 22 °C overnight. The reaction was quenched at 0 °C with saturated aqueous NH<sub>4</sub>Cl (20 mL) and extracted with EtOAc (3 x 20 mL). The combined organic layers were washed with brine, dried over Na<sub>2</sub>SO<sub>4</sub>, filtered, and concentrated in vacuo. The product was purified either by recrystallization (if the unpurified material was already crystalline) or by flash column chromatography using silica gel (generally, the unpurified material was first adsorbed onto silica).

**Note:** In the case of compounds **4a** or **4b**, *n*-butyllithium or methyllithium (2.2 equiv) was slowly added directly to a solution of saccharin (1.0 equiv) in THF at  $-78\text{ }^{\circ}\text{C}$ .

#### METHOD E: CHLOROSULFONYL ISOCYANATE CONDENSATION

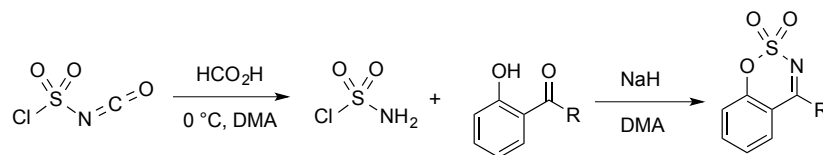

Prepared according to a modified procedure described by Hayashi and co-workers.<sup>7</sup> To a flame-dried round-bottom flask was added chlorosulfonyl isocyanate (2.0 equiv), followed by anhydrous formic acid (2.0 equiv) added dropwise via syringe at  $0\text{ }^{\circ}\text{C}$ . Upon addition, a white solid was formed along with vigorous gas evolution. The viscous reaction was stirred for 10 min, until gas evolution ceased.

To this mixture was added neat 2-hydroxyketone (1.0 equiv) dropwise via syringe at rt, and the reaction was stirred for 10 min, then cooled to  $0\text{ }^{\circ}\text{C}$ . Anhydrous DMA (7 mL) was slowly added and the reaction mixture was warmed to rt and stirred 10 min. One portion of a solution of sodium hydride (1.2 equiv) in DMA (3 mL) was added to the reaction, followed by the other portion after 30 min. The reaction mixture was stirred 1 h at rt, then warmed to  $50\text{ }^{\circ}\text{C}$  and stirred 12 h. The reaction was quenched with  $\text{H}_2\text{O}$  (10 mL) and extracted with EtOAc (3 x 10 mL). The combined organic layers were washed with brine, dried over  $\text{Na}_2\text{SO}_4$ , filtered, and concentrated in vacuo. The product was purified by flash column chromatography using silica gel (the unpurified material was first adsorbed onto silica).

## E. CHARACTERIZATION DATA FOR STARTING MATERIALS

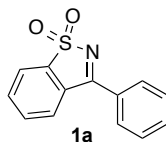

**N-Sulfonyl ketimine 1a** was prepared according Method C, using the following amounts of reagents: saccharin (1.10 g, 6.00 mmol, 1.00 equiv), phenylmagnesium bromide (6.0 mL, 12 mmol, 2.0 M in THF, 2.0 equiv) and THF (25 mL). The product was recrystallized from hot Et<sub>2</sub>O in CHCl<sub>3</sub> (1:1 Et<sub>2</sub>O/CHCl<sub>3</sub>) to afford the title compound as a white solid (0.715 g, 2.94 mmol, 49% yield). Analytical data are consistent with literature values.<sup>5</sup> **TLC**  $R_f$  = 0.2 (20% EtOAc/hexanes, UV active); **m.p.** = 163–165 °C; **<sup>1</sup>H NMR** (500 MHz, CDCl<sub>3</sub>) δ 8.03 (d,  $J$  = 7.5 Hz, 1H), 7.98 (d,  $J$  = 7.3 Hz, 2H), 7.91 (d,  $J$  = 7.3 Hz, 1H), 7.80 (t,  $J$  = 7.3 Hz, 1H), 7.75 (t,  $J$  = 7.3 Hz, 1H), 7.71 (t,  $J$  = 7.5 Hz, 1H), 7.62 (t,  $J$  = 7.6 Hz, 2H); **<sup>13</sup>C NMR** (125 MHz, CDCl<sub>3</sub>) δ 171.2, 141.3, 133.8, 133.6, 133.5, 130.7, 130.6, 129.7, 129.4, 126.7, 123.3; **IR** (neat) 1599, 1531, 1332, 1171 cm<sup>-1</sup>; **HRMS** (TOF MS ES+)  $m/z$  calcd for C<sub>13</sub>H<sub>9</sub>NO<sub>2</sub>S (M + Na)<sup>+</sup> 266.0252, found 266.0255.

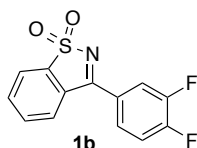

**N-Sulfonyl ketimine 1b** was prepared according Method C, using the following amounts of reagents: saccharin (1.28 g, 7.00 mmol, 1.00 equiv), 3,4-difluorophenylmagnesium bromide (11.2 mL, 14.0 mmol, 1.25 M in THF, 2.00 equiv) and THF (20 mL). The product was recrystallized from hot Et<sub>2</sub>O in CHCl<sub>3</sub> (1:1 Et<sub>2</sub>O/CHCl<sub>3</sub>) to afford the title compound as a yellow solid (0.235 g, 0.840 mmol, 12%). Analytical data are consistent with literature values.<sup>5</sup> **TLC**  $R_f$  = 0.2 (20% EtOAc/hexanes, UV active); **m.p.** = 170–171 °C; **<sup>1</sup>H NMR** (500 MHz, CDCl<sub>3</sub>) δ 8.04 (d,  $J$  = 7.5 Hz, 1H), 7.89–7.76 (m, 5H), 7.43 (q,  $J$  = 8.5 Hz, 1H); **<sup>13</sup>C NMR** (125 MHz, CDCl<sub>3</sub>) δ 169.0, 153.9 (dd,  $J$  = 258.9, 12.5 Hz), 150.8 (dd,  $J$  = 252.9, 13.4 Hz), 141.3, 134.0, 133.9, 130.0, 127.5 (dd,  $J$  = 6.0, 4.2 Hz), 126.7 (dd,  $J$  = 7.4, 3.7), 126.3, 123.6, 119.2 (d,  $J$  = 19.4 Hz), 118.7 (d,  $J$  = 18.0 Hz); **<sup>19</sup>F NMR** (376.5 MHz, CDCl<sub>3</sub>) δ -128.4 (m), -134.3 (dt,  $J$  = 20.7, 9.2 Hz); **IR** (neat) 1738, 1511, 1335, 1173 cm<sup>-1</sup>; **HRMS** (TOF MS ES+)  $m/z$  calcd for C<sub>13</sub>H<sub>7</sub>F<sub>2</sub>NO<sub>2</sub>S (M + Na)<sup>+</sup> 302.0063, found 302.0052.

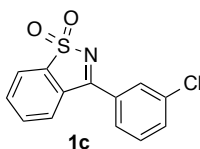

**N-Sulfonyl ketimine 1c** was prepared according Method C, using the following amounts of reagents: saccharin (0.824 g, 4.50 mmol, 1.00 equiv), 3-chlorophenylmagnesium bromide (6.0 mL, 9.0 mmol, 1.5 M in THF, 2.0 equiv) and THF (15 mL). The product was recrystallized from hot Et<sub>2</sub>O in CHCl<sub>3</sub> (1:1 Et<sub>2</sub>O/CHCl<sub>3</sub>) to afford the title compound as a white solid (0.700 g, 2.52 mmol, 56%). Analytical data are consistent with literature values.<sup>5</sup> **TLC**  $R_f$  = 0.2 (20%

EtOAc/hexanes, UV active); **m.p.** = 149–151 °C; **<sup>1</sup>H NMR** (500 MHz, CDCl<sub>3</sub>) δ 8.03 (d, *J* = 7.2 Hz, 1H), 7.96 (s, 1H), 7.87 (t, *J* = 7.5 Hz, 2H), 7.82 (t, *J* = 7.2 Hz, 1H), 7.78 (t, *J* = 7.6 Hz, 1H), 7.68 (d, *J* = 8.3 Hz, 1H), 7.57 (t, *J* = 8.1 Hz, 1H); **<sup>13</sup>C NMR** (125 MHz, CDCl<sub>3</sub>) δ 170.0, 141.2, 135.6, 134.0, 133.8, 133.5, 132.2, 130.7, 130.2, 129.5, 127.7, 126.4, 123.5; **IR** (neat) 1537, 1332, 1173 cm<sup>-1</sup>; **HRMS** (TOF MS ES+) *m/z* calcd for C<sub>13</sub>H<sub>8</sub>ClNO<sub>2</sub>S (M + Na)<sup>+</sup> 299.9862, found 299.9863.

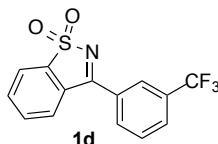

**N-Sulfonyl ketimine 1d** was prepared according Method C, using the following amounts of reagents: saccharin (0.46 g, 2.5 mmol, 1.0 equiv), (3-(trifluoromethyl)phenyl)magnesium iodide (4.00 mL, 5.00 mmol, 1.25 M in THF, 2.00 equiv) and THF (2.5 mL). The product was recrystallized from hot Et<sub>2</sub>O in CHCl<sub>3</sub> (1:1 Et<sub>2</sub>O/CHCl<sub>3</sub>) to afford the title compound as a pale yellow solid (0.21 g, 0.68 mmol, 27%). **TLC** *R<sub>f</sub>* = 0.4 (20% EtOAc/hexanes, UV active); **m.p.** = 154–156 °C; **<sup>1</sup>H NMR** (500 MHz, CDCl<sub>3</sub>) δ 8.22 (s, 1H), 8.16 (d, *J* = 7.8 Hz, 1H), 8.04 (d, *J* = 7.8 Hz, 1H), 7.96 (d, *J* = 8.0 Hz, 1H), 7.84–7.81 (m, 2H), 7.80–7.76 (m, 2H); **<sup>13</sup>C NMR** (125.7 MHz, CDCl<sub>3</sub>) δ 169.9, 141.3, 134.1, 133.9, 132.7, 132.2 (q, *J* = 33.3 Hz), 131.5, 130.14, 130.09, 129.9 (q, *J* = 3.7 Hz), 126.4 (q, *J* = 3.7 Hz), 126.3, 123.55, 123.54 (q, *J* = 272.8 Hz); **<sup>19</sup>F NMR** (376.5 MHz, CDCl<sub>3</sub>) δ -62.9; **IR** (neat) 1614, 1325, 1281, 1166, 1123 cm<sup>-1</sup>; **HRMS** (TOF MS ES+) *m/z* calcd for C<sub>14</sub>H<sub>8</sub>F<sub>3</sub>NO<sub>2</sub>S (M + Na)<sup>+</sup> 334.0125, found 334.0131.

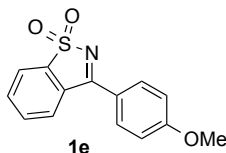

**N-Sulfonyl ketimine 1e** was prepared according Method C, using the following amounts of reagents: saccharin (1.37 g, 7.50 mmol, 1.00 equiv), 4-methoxyphenylmagnesium bromide (7.5 mL, 15 mmol, 2.0 M in THF, 2.0 equiv) and THF (25 mL). The product was recrystallized from hot Et<sub>2</sub>O in CHCl<sub>3</sub> (1:1 Et<sub>2</sub>O/CHCl<sub>3</sub>) to afford the title compound as a light green solid (1.00 g, 3.68 mmol, 49%). Analytical data are consistent with literature values.<sup>5</sup> **TLC** *R<sub>f</sub>* = 0.1 (20% EtOAc/hexanes, UV active); **m.p.** = 205–206 °C; **<sup>1</sup>H NMR** (500 MHz, CDCl<sub>3</sub>) δ 8.05–8.00 (m, 3H), 7.96 (d, *J* = 7.3 Hz, 1H), 7.76 (dt, *J* = 18.2, 7.5 Hz, 2H), 7.10 (d, *J* = 8.7 Hz, 2H), 3.94 (s, 3H); **<sup>13</sup>C NMR** (125 MHz, CDCl<sub>3</sub>) δ 170.1, 164.3, 141.5, 133.6, 133.3, 132.1, 131.1, 126.7, 123.2, 123.0, 114.9, 55.8; **IR** (neat) 1599, 1503, 1316, 1254, 1159 cm<sup>-1</sup>; **HRMS** (TOF MS ES+) *m/z* calcd for C<sub>14</sub>H<sub>11</sub>NO<sub>3</sub>S (M + Na)<sup>+</sup> 296.0357, found 296.0362.

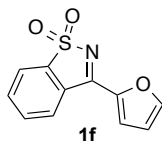

**N-Sulfonyl ketimine 1f** was prepared according Method D, using the following amounts of reagents: furan (0.910 mL, 12.5 mmol, 2.50 equiv), *n*-BuLi (5.50 mL, 13.8 mmol, 2.50 M in hexanes, 2.75 equiv), saccharin (0.92 g, 5.0 mmol, 1.0 equiv), and THF (15 mL). The product was recrystallized from hot Et<sub>2</sub>O in CHCl<sub>3</sub> (1:1 Et<sub>2</sub>O/CHCl<sub>3</sub>) to afford the title compound as a yellow solid (0.16 g, 0.70 mmol, 14%). Analytical data are consistent with literature values.<sup>5</sup> **TLC** *R<sub>f</sub>* = 0.2 (20% EtOAc/hexanes, UV active); **<sup>1</sup>H NMR** (500 MHz, CDCl<sub>3</sub>) δ 8.49 (dd, *J* = 5.5, 3.0 Hz, 1H), 7.98 (dd, *J* = 5.5, 3.0 Hz, 1H), 7.91 (s, 1H), 7.79–7.76 (m, 3H), 6.79 (dd, *J* = 3.7, 1.6 Hz, 1H); **<sup>13</sup>C NMR** (125.7 MHz, CDCl<sub>3</sub>) δ 158.1, 149.4, 148.2, 141.0, 133.9, 133.6, 129.8, 127.6, 122.8, 122.2, 114.1; **IR** (neat) 1600, 1571, 1516, 1320, 1165 cm<sup>-1</sup>; **HRMS** (TOF MS ES+) *m/z* calcd for C<sub>11</sub>H<sub>7</sub>NO<sub>3</sub>S (M + Na)<sup>+</sup> 256.0044, found 256.0043.

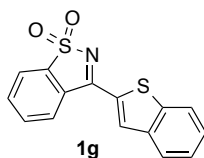

**N-Sulfonyl ketimine 1g** was prepared according Method D, using the following amounts of reagents: benzothiophene (1.46 mL, 12.5 mmol, 2.50 equiv), *n*-BuLi (5.50 mL, 13.8 mmol, 2.50 M in hexanes, 2.75 equiv), saccharin (0.92 g, 5.0 mmol, 1.0 equiv), and THF (16 mL). The product was purified by flash column chromatography using 20–30–50% EtOAc/hexanes to afford the title compound as a yellow solid (0.29 g, 0.96 mmol, 19%). **TLC** *R<sub>f</sub>* = 0.2 (20% EtOAc/hexanes, UV active); **m.p.** = 266–268 °C; **<sup>1</sup>H NMR** (500 MHz, CDCl<sub>3</sub>) δ 8.46 (s, 1H), 8.30–8.28 (m, 1H), 8.05–8.03 (m, 1H), 7.99 (d, *J* = 8.1 Hz, 1H), 7.96 (d, *J* = 8.2 Hz, 1H), 7.83–7.81 (m, 2H), 7.56 (t, *J* = 7.6 Hz, 1H), 7.50 (t, *J* = 7.6 Hz, 1H); **<sup>13</sup>C NMR** (125.7 MHz, CDCl<sub>3</sub>) δ 164.0, 142.9, 141.4, 139.2, 133.9, 133.7, 132.7, 130.4, 128.6, 126.1, 126.0, 125.8, 123.3, 122.9; **IR** (neat) 1593, 1526, 1316, 1171, 744 cm<sup>-1</sup>; **HRMS** (TOF MS ES+) *m/z* calcd for C<sub>15</sub>H<sub>9</sub>NO<sub>2</sub>S<sub>2</sub> (M + Na)<sup>+</sup> 321.9973, found 321.9986.

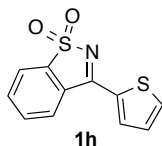

**N-Sulfonyl ketimine 1h** was prepared according Method C, using the following amounts of reagents: saccharin (0.92 g, 5.0 mmol, 1.0 equiv), 2-thienylmagnesium bromide (8.00 mL, 10.0 mmol, 1.25 M in THF, 2.00 equiv) and THF (5 mL). The product was recrystallized from hot Et<sub>2</sub>O in CHCl<sub>3</sub> (1:1 Et<sub>2</sub>O/CHCl<sub>3</sub>) to afford the title compound as an orange solid (0.22 g, 0.90 mmol, 18%). Analytical data are consistent with literature values.<sup>6</sup> **TLC** *R<sub>f</sub>* = 0.2 (20% EtOAc/hexanes, UV active); **<sup>1</sup>H NMR** (500 MHz, CDCl<sub>3</sub>) δ 8.23 (d, *J* = 3.9 Hz, 1H), 8.21–8.18 (m, 1H), 8.03–8.00 (m, 1H), 7.88 (d, *J* = 5.0 Hz, 1H), 7.82–7.77 (m, 2H), 7.34 (t, *J* = 4.4 Hz, 1H); **<sup>13</sup>C NMR** (125.7 MHz, CDCl<sub>3</sub>) δ 163.1, 141.4, 135.8, 135.3, 134.0, 133.8, 133.6, 130.5,

129.2, 125.8, 123.2; **IR** (neat) 1594, 1416, 1316, 1164, 725  $\text{cm}^{-1}$ ; **HRMS** (TOF MS ES+)  $m/z$  calcd for  $\text{C}_{11}\text{H}_7\text{NO}_2\text{S}_2$  ( $\text{M} + \text{Na}$ )<sup>+</sup> 271.9816, found 271.9816.

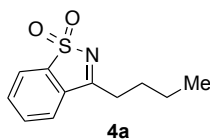

**N-Sulfonyl ketimine 4a** was prepared according Method D, using the following amounts of reagents: saccharin (0.92 g, 5.0 mmol, 1.0 equiv), *n*-BuLi (5.50 mL, 13.8 mmol, 2.50 M in hexanes, 2.75 equiv), and THF (18 mL). The product was purified by flash column chromatography using 20% EtOAc/hexanes to afford the title compound as a yellow solid (0.40 g, 1.8 mmol, 36%). Analytical data are consistent with literature values.<sup>6</sup> **TLC**  $R_f$  = 0.4 (20% EtOAc/hexanes, stains with  $\text{KMnO}_4$ ); **<sup>1</sup>H NMR** (400 MHz,  $\text{CDCl}_3$ )  $\delta$  7.93–7.90 (m, 1H), 7.77–7.68 (m, 3H), 2.97 (t,  $J$  = 7.4 Hz, 2H), 1.88 (quint,  $J$  = 7.4 Hz, 2H), 1.51 (sext,  $J$  = 7.4 Hz, 2H), 0.99 (t,  $J$  = 7.4 Hz, 3H); **<sup>13</sup>C NMR** (125.7 MHz,  $\text{CDCl}_3$ )  $\delta$  176.5, 140.0, 134.0, 133.6, 131.5, 124.0, 122.6, 31.0, 27.6, 22.5, 13.9; **IR** (neat) 2342, 1604, 1558, 1332, 1172  $\text{cm}^{-1}$ ; **HRMS** (TOF MS ES+)  $m/z$  calcd for  $\text{C}_{11}\text{H}_{13}\text{NO}_2\text{S}$  ( $\text{M} + \text{Na}$ )<sup>+</sup> 246.0565, found 246.0568.

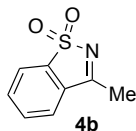

**N-Sulfonyl ketimine 4b** was prepared according Method D, using the following amounts of reagents: saccharin (1.83 g, 10.0 mmol, 1.00 equiv), MeLi (15.7 mL, 22.0 mmol, 1.40 M in  $\text{Et}_2\text{O}$ , 2.20 equiv) and THF (10 mL). The product was purified by flash column chromatography using 20% EtOAc/hexanes to afford the title compound as a white solid (1.13 g, 6.21 mmol, 62%). Analytical data are consistent with literature values.<sup>6</sup> **TLC**  $R_f$  = 0.3 (20% EtOAc/hexanes, stains with  $\text{KMnO}_4$ ); **<sup>1</sup>H NMR** (500 MHz,  $\text{CDCl}_3$ )  $\delta$  7.99–7.97 (m, 1H), 7.84–7.79 (m, 2H), 7.76–7.75 (m, 1H), 2.73 (s, 3H); **<sup>13</sup>C NMR** (125.7 MHz,  $\text{CDCl}_3$ )  $\delta$  173.4, 139.7, 134.1, 133.7, 131.7, 124.3, 122.5, 17.7; **IR** (neat) 2341, 1558, 1316, 1168, 771  $\text{cm}^{-1}$ ; **HRMS** (TOF MS ES+)  $m/z$  calcd for  $\text{C}_8\text{H}_7\text{NO}_2\text{S}$  ( $\text{M} + \text{Na}$ )<sup>+</sup> 204.0095, found 204.0098.

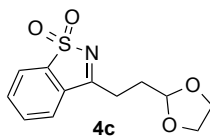

**N-Sulfonyl ketimine 4c** was prepared according Method C, using the following amounts of reagents: saccharin (1.2 g, 6.5 mmol, 1.0 equiv), (2-(1,3-dioxolan-2-yl)ethyl)magnesium bromide (14.0 mL, 13.0 mmol, 0.900 M in THF, 2.00 equiv) and THF (17 mL). The product was purified by flash column chromatography using 50% EtOAc/hexanes to afford the title compound as a white solid (0.80 g, 3.0 mmol, 46%). **TLC**  $R_f$  = 0.5 (50% EtOAc/hexanes, UV active); **m.p.** = 68–70 °C; **<sup>1</sup>H NMR** (400 MHz,  $\text{CDCl}_3$ )  $\delta$  7.93–7.90 (m, 1H), 7.77–7.71 (m, 3H), 5.07 (t,  $J$  = 4.0 Hz, 1H), 4.01–3.95 (m, 2H), 3.93–3.87 (m, 2H), 3.12 (t,  $J$  = 7.4 Hz, 2H), 2.31 (td,  $J$  = 7.4, 4.0 Hz, 2H); **<sup>13</sup>C NMR** (125.7 MHz,  $\text{CDCl}_3$ )  $\delta$  176.2, 139.8, 134.0, 133.6, 131.3, 124.1, 122.5,

102.6, 65.2, 29.0, 25.1; **IR** (neat) 1607, 1333, 1172, 909, 726  $\text{cm}^{-1}$ ; **HRMS** (TOF MS ES+)  $m/z$  calcd for  $\text{C}_{12}\text{H}_{13}\text{NO}_4\text{S}$  ( $\text{M} + \text{Na}$ )<sup>+</sup> 290.0463, found 290.0465.

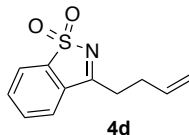

**N-Sulfonyl ketimine 4d** was prepared according Method C, using the following amounts of reagents: saccharin (0.82 g, 4.5 mmol, 1.0 equiv), 4-butenylmagnesium bromide (5.0 mL, 4.5 mmol, 0.90 M in THF, 1.0 equiv) and THF (6 mL). The product was purified by flash column chromatography using 10–20% EtOAc/hexanes to afford the title compound as a white solid (0.16 g, 0.71 mmol, 16%). Analytical data are consistent with literature values.<sup>8</sup> **TLC**  $R_f$  = 0.3 (20% EtOAc/hexanes, stains with  $\text{KMnO}_4$ ); **m.p.** = 81 °C; **<sup>1</sup>H NMR** (400 MHz,  $\text{CDCl}_3$ )  $\delta$  7.93–7.88 (m, 1H), 7.78–7.68 (m, 3H), 5.99–5.89 (m, 1H), 5.15 (dd,  $J$  = 17.1, 1.5 Hz, 1H), 5.09 (dd,  $J$  = 10.2, 1.4 Hz, 1H), 3.07 (t,  $J$  = 7.5 Hz, 2H), 2.69–2.63 (m, 2H); **<sup>13</sup>C NMR** (125.7 MHz,  $\text{CDCl}_3$ )  $\delta$  175.7, 139.9, 135.9, 134.1, 133.7, 131.3, 124.0, 122.6, 116.7, 30.6, 29.2; **IR** (neat) 2923, 2257, 1558, 1334, 907, 726  $\text{cm}^{-1}$ ; **HRMS** (TOF MS ES+)  $m/z$  calcd for  $\text{C}_{11}\text{H}_{11}\text{NO}_2\text{S}$  ( $\text{M} + \text{Na}$ )<sup>+</sup> 244.0408, found 244.0419.

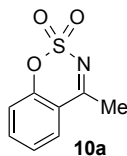

**N-Sulfonyl ketimine 10a** was prepared according Method E, using the following amounts of reagents: chlorosulfonyl isocyanate (1.74 mL, 20.0 mmol, 2.00 equiv), anhydrous formic acid (0.750 mL, 20.0 mmol, 2.00 equiv), 2-hydroxyacetophenone (1.20 mL, 10.0 mmol, 1.00 equiv), sodium hydride (0.576 g, 24.0 mmol, 2.4 equiv) and DMA (25 mL). The product was purified by flash column chromatography using 20% EtOAc/hexanes to afford the title compound as a light yellow solid (0.690 g, 3.50 mmol, 34%). Analytical data are consistent with literature values.<sup>7</sup> **TLC**  $R_f$  = 0.3 (20% EtOAc/hexanes, UV active); **m.p.** = 112–114 °C; **<sup>1</sup>H NMR** (500 MHz,  $\text{CDCl}_3$ )  $\delta$  7.81 (dd,  $J$  = 8.2, 1.5 Hz, 1H), 7.72 (td,  $J$  = 7.6, 1.6 Hz, 1H), 7.40 (t,  $J$  = 7.5 Hz, 1H), 7.30 (d,  $J$  = 8.3 Hz, 1H), 2.74 (s, 3H); **<sup>13</sup>C NMR** (125 MHz,  $\text{CDCl}_3$ )  $\delta$  177.4, 153.6, 137.2, 128.6, 126.0, 119.3, 116.6, 23.9; **IR** (neat) 1594, 1556, 1367, 1323  $\text{cm}^{-1}$ ; **HRMS** (TOF MS ES+)  $m/z$  calcd for  $\text{C}_8\text{H}_7\text{NO}_3\text{S}$  ( $\text{M} + \text{Na}$ )<sup>+</sup> 220.0044, found 220.0046.

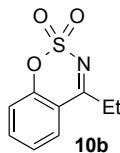

**N-Sulfonyl ketimine 10b** was prepared according Method E, using the following amounts of reagents: chlorosulfonyl isocyanate (1.74 mL, 20.0 mmol, 2.00 equiv), anhydrous formic acid (0.750 mL, 20.0 mmol, 2.00 equiv), 2-hydroxypropiophenone (1.74 mL, 10.0 mmol, 1.00 equiv),

sodium hydride (0.576 g, 24.0 mmol, 2.4 equiv) and DMA (25 mL). The product was purified by flash column chromatography using 20% EtOAc/hexanes to afford the title compound as a light yellow solid (1.06 g, 5.02 mmol, 50%). Analytical data are consistent with literature values.<sup>7</sup> **TLC**  $R_f$  = 0.4 (20% EtOAc/hexanes, UV active); **m.p.** = 79–81 °C **<sup>1</sup>H NMR** (500 MHz, CDCl<sub>3</sub>)  $\delta$  7.82 (dd,  $J$  = 8.0, 1.2 Hz, 1H), 7.71 (td,  $J$  = 7.6, 1.6 Hz, 2H), 7.39 (d,  $J$  = 7.3 Hz, 1H), 7.30 (t,  $J$  = 78.0 Hz, 1H), 7.36 (d,  $J$  = 7.2 Hz, 1H), 3.10 (t,  $J$  = 7.3 Hz, 2H), 1.36 (t,  $J$  = 7.2 Hz, 2H); **<sup>13</sup>C NMR** (125 MHz, CDCl<sub>3</sub>)  $\delta$  180.9, 153.6, 136.9, 1279, 126.0, 119.4, 116.2, 29.4, 9.8; **IR** (neat) 1596, 1553, 1373, 1360 cm<sup>-1</sup>; **HRMS** (TOF MS ES+)  $m/z$  calcd for C<sub>9</sub>H<sub>9</sub>NO<sub>3</sub>S (M + Na)<sup>+</sup> 234.0201, found 234.0202.



## F. SYNTHETIC TRANSFORMATIONS OF HOMOPROPARGYLIC SULTAMS (SCHEME 3)

### 1) ENYNE RING-CLOSING METATHESIS TO FORM **6**

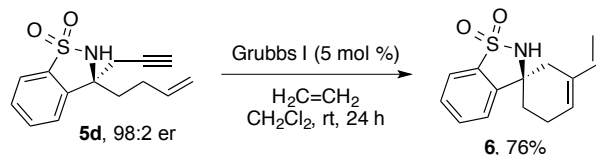

**Sultam 6** was prepared according to a modified procedure described by Mori and co-workers.<sup>9</sup> To a flame-dried 7 mL reaction vial equipped with a  $\text{N}_2$  line and Grubbs 1<sup>st</sup> generation catalyst (6.0 mg, 0.0070 mmol, 0.050 equiv) was added substrate **5d** (36.8 mg, 0.140 mmol, 1.00 equiv) in anhydrous  $\text{CH}_2\text{Cl}_2$  (5 mL). The  $\text{N}_2$  atmosphere was exchanged with ethylene (1 atm, balloon), taking care to fully purge the vial of  $\text{N}_2$ . After stirring 24 h at room temperature, the reaction mixture was concentrated in vacuo. The product was purified by flash column chromatography using 5–10% EtOAc/hexanes (1% TEA) to afford the title compound as a colorless oil (28.0 mg, 0.110 mmol, 76%). Enantiomeric ratio could not be determined for the title compound using chiral SFC instrumentation due to lack of separation of the enantiomers. **TLC**  $R_f$  = 0.4 (20% EtOAc/hexanes, stains blue with PAA); **<sup>1</sup>H NMR** (400 MHz,  $\text{CDCl}_3$ )  $\delta$  7.78 (d,  $J$  = 7.7 Hz, 1H), 7.66 (t,  $J$  = 7.6 Hz, 1H), 7.56 (t,  $J$  = 7.6 Hz, 1H), 7.41 (d,  $J$  = 8.0 Hz, 1H), 6.42 (dd,  $J$  = 17.6, 10.9 Hz, 1H), 5.94 (s, 1H), 5.04–4.97 (m, 2H), 4.72 (s, 1H), 2.69 (d,  $J$  = 17.4 Hz, 1H), 2.58–2.49 (m, 2H), 2.45–2.37 (m, 1H), 2.07–1.94 (m, 2H); **<sup>13</sup>C NMR** (125.7 MHz,  $\text{CDCl}_3$ )  $\delta$  144.6, 138.6, 135.5, 133.6, 133.2, 129.6, 128.7, 123.4, 121.6, 111.7, 61.9, 37.0, 33.3, 23.4; **IR** (neat) 3455, 3251, 2926, 1161, 1061, 744  $\text{cm}^{-1}$ ; **HRMS** (TOF MS ES+)  $m/z$  calcd for  $\text{C}_{14}\text{H}_{15}\text{NO}_2\text{S}$  (M + Na)<sup>+</sup> 284.0721, found 284.0712;  $[\alpha]_D^{24}$  –14 ( $c$  0.9,  $\text{CDCl}_3$ ).

### 2) SONOGASHIRA CROSS-COUPLING REACTION TO FORM **7**

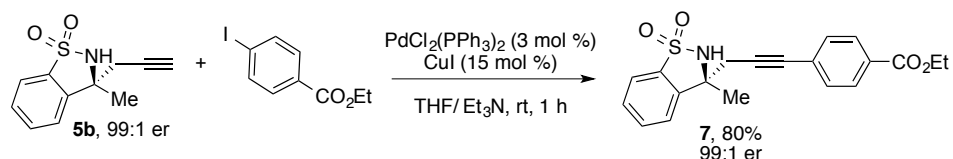

**Sultam 7** was prepared according to a modified procedure described by Hoppe and co-workers.<sup>10</sup> To a flame-dried 7 mL reaction vial equipped with a  $\text{N}_2$  line, substrate **5b** (22.1 mg, 0.100 mmol, 1.00 equiv), bis(triphenylphosphine)palladium(II) dichloride (2.1 mg, 0.0030 mmol, 0.030 equiv), and copper(I) iodide (2.9 mg, 0.015, 0.15 equiv) was added anhydrous THF (0.7 mL) then anhydrous TEA (0.3 mL). Ethyl 4-iodobenzoate (37  $\mu\text{L}$ , 0.20 mmol, 2.0 equiv) was added via syringe. After stirring 1 h at room temperature, the reaction mixture was quenched with 1 M HCl (2 mL), extracted with EtOAc (3 x 2 mL), rinsed with brine, dried with  $\text{Na}_2\text{SO}_4$ , filtered, and concentrated in vacuo. The product was purified by flash column chromatography using 5–30% EtOAc/hexanes (1% TEA) to afford the title compound as a yellow solid (29.8 mg, 0.0807 mmol, 80%, 99:1 er). **TLC**  $R_f$  = 0.2 (20% EtOAc/hexanes, UV active, stains pink with PAA); **m.p.** = 162–164 °C; **<sup>1</sup>H NMR** (500 MHz,  $\text{CDCl}_3$ )  $\delta$  7.97 (d,  $J$  = 8.4 Hz, 2H), 7.80 (d,  $J$  = 7.7 Hz,

1H), 7.67 (td,  $J = 7.7, 1.0$  Hz, 1H), 7.57 (td,  $J = 7.7, 1.0$  Hz, 1H), 7.52 (d,  $J = 8.0$  Hz, 3H), 7.42 (d,  $J = 8.4$ , 2H), 4.83 (br s, 1H), 4.38 (q,  $J = 7.1$  Hz, 2H), 3.08–3.00 (m, 2H), 1.82 (s, 3H), 1.39 (t,  $J = 7.1$  Hz, 3H);  $^{13}\text{C}$  NMR (125.7 MHz,  $\text{CDCl}_3$ )  $\delta$  166.0, 143.3, 135.7, 133.4, 131.6, 130.1, 129.8, 129.5, 127.1, 123.3, 121.5, 87.0, 83.9, 62.4, 61.2, 33.7, 27.2, 14.4; IR (neat) 3254, 2982, 1713, 1606, 1274, 1172  $\text{cm}^{-1}$ ; HRMS (TOF MS ES+)  $m/z$  calcd for  $\text{C}_{20}\text{H}_{19}\text{NO}_4\text{S}$  ( $\text{M} + \text{Na}$ ) $^+$  392.0933, found 392.0932;  $[\alpha]^{24}_{\text{D}}$  +8 ( $c$  0.8,  $\text{CDCl}_3$ ); SFC analysis (OD-H, 20% IPA, 3.0 mL/min, 215 nm) indicated 99:1 er:  $t_{\text{R}}$  (minor) = 5.8 min,  $t_{\text{R}}$  (major) = 6.3 min.

### 3) LINDLAR REDUCTION TO FORM **8**

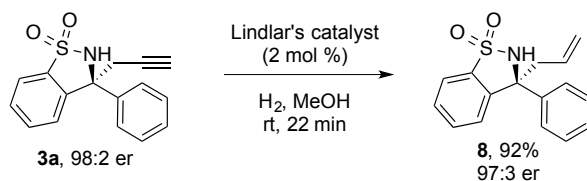

**Sultam 8** was prepared according to a modified procedure described by Jarvo and co-workers.<sup>11</sup> To a flame-dried 7 mL reaction vial equipped with a  $\text{N}_2$  line, substrate **3a** (41.0 mg, 0.145 mmol, 1.00 equiv), and palladium, 5% on calcium carbonate, lead poisoned (6.4 mg, 2 mol % palladium relative to **3a**) was added anhydrous MeOH (2 mL). The  $\text{N}_2$  atmosphere was exchanged with  $\text{H}_2$  (1 atm, balloon) and the reaction was allowed to stir at room temperature. After 22 min, the  $\text{H}_2$  atmosphere was exchanged with  $\text{N}_2$  and the reaction mixture was filtered through a pad of Celite using 50% EtOAc/hexanes, and then concentrated in vacuo. The product was purified by flash column chromatography using 5–10% EtOAc/hexanes (1% TEA) to afford the title compound as a white solid (38.2 mg, 0.134 mmol, 92%, 97:3 er). TLC  $R_{\text{f}}$  = 0.1 (10% EtOAc/hexanes, stains blue with PAA); m.p. = 125–127  $^{\circ}\text{C}$ ;  $^1\text{H}$  NMR (500 MHz,  $\text{CDCl}_3$ )  $\delta$  7.77 (d,  $J = 7.8$  Hz, 1H), 7.62–7.58 (m, 3H), 7.52 (t,  $J = 7.7$  Hz, 1H), 7.38 (t,  $J = 7.9$  Hz, 3H), 7.30 (m, 1H), 5.66–5.57 (m, 1H), 5.28–5.21 (m, 2H), 5.00 (s, 1H), 3.25 (dd,  $J = 14.3, 6.6$  Hz, 1H), 3.03 (dd,  $J = 14.3, 7.7$  Hz, 1H);  $^{13}\text{C}$  NMR (125.7 MHz,  $\text{CDCl}_3$ )  $\delta$  143.2, 141.7, 134.8, 133.5, 131.7, 129.6, 129.1, 128.3, 126.3, 124.6, 122.0, 121.6, 67.7, 45.2; IR (neat) 3290, 3069, 1295, 1168, 906, 729  $\text{cm}^{-1}$ ; HRMS (TOF MS ES+)  $m/z$  calcd for  $\text{C}_{16}\text{H}_{15}\text{NO}_2\text{S}$  ( $\text{M} + \text{Na}$ ) $^+$  308.0721, found 308.0723;  $[\alpha]^{24}_{\text{D}}$  +72 ( $c$  0.9,  $\text{CDCl}_3$ ); SFC analysis (OD-H, 10% IPA, 3.0 mL/min, 215 nm) indicated 97:3 er:  $t_{\text{R}}$  (minor) = 9.9 min,  $t_{\text{R}}$  (major) = 12.6 min.

#### 4) Pd/C REDUCTION TO FORM **9**

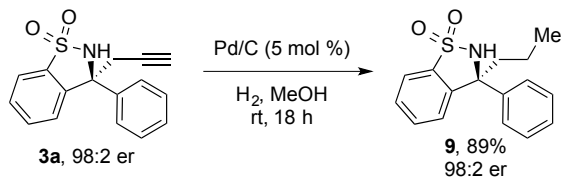

**Sultam 9.** To a flame-dried 7 mL reaction vial equipped with a N<sub>2</sub> line and palladium, 10% on carbon (6.3 mg, 5 mol % palladium relative to **3a**) was added substrate **3a** (32.3 mg, 0.114 mmol, 1.00 equiv) in anhydrous MeOH (1.0 mL). The vial was evacuated and refilled with N<sub>2</sub> three times. The N<sub>2</sub> atmosphere was exchanged with H<sub>2</sub> (1 atm, balloon) and the reaction was allowed to stir at room temperature. After 18 h, the H<sub>2</sub> atmosphere was exchanged with N<sub>2</sub> and the reaction mixture was filtered through a pad of Celite using MeOH, and then concentrated in vacuo. The product was purified by flash column chromatography using 5–10–20% EtOAc/hexanes (1% TEA) to afford the title compound as a white solid (29.2 mg, 0.102 mmol, 89%, 98:2 er). **TLC** R<sub>f</sub> = 0.5 (20% EtOAc/hexanes, stains blue with PAA); **m.p.** = 160–162 °C; **<sup>1</sup>H NMR** (400 MHz, CDCl<sub>3</sub>) δ 7.78 (d, *J* = 7.7 Hz, 1H), 7.60–7.49 (m, 4H), 7.36 (t, *J* = 7.7 Hz, 2H), 7.29 (t, *J* = 7.0 Hz, 2H), 4.86 (br s, 1H), 2.44–2.36 (m, 1H), 2.33–2.26 (m, 1H), 1.57–1.46 (m, 1H), 1.24–1.02 (m, 1H), 0.94 (t, *J* = 7.3 Hz, 3H); **<sup>13</sup>C NMR** (125.7 MHz, CDCl<sub>3</sub>) δ 143.6, 142.5, 134.5, 133.5, 129.4, 129.1, 128.2, 126.1, 124.4, 121.4, 68.9, 42.6, 17.5, 14.1; **IR** (neat) 3251, 2958, 1450, 1281, 1157, 765 cm<sup>-1</sup>; **HRMS** (TOF MS ES<sup>+</sup>) *m/z* calcd for C<sub>16</sub>H<sub>17</sub>NO<sub>2</sub>S (M + Na)<sup>+</sup> 310.0878, found 310.0883; **[α]<sub>D</sub><sup>25</sup>** +95 (*c* 0.9, CDCl<sub>3</sub>); **SFC** analysis (OD-H, 10% IPA, 3.0 mL/min, 215 nm) indicated 98:2 er: t<sub>R</sub> (minor) = 11.0 min, t<sub>R</sub> (major) = 13.9 min.

## G. MECHANISTIC STUDIES (TABLE 2)

### 1) SYNTHESIS OF PROPARGYL BOROLANE REAGENT **12**

Scheme SI-2. Synthesis of propargyl borolane **12**.

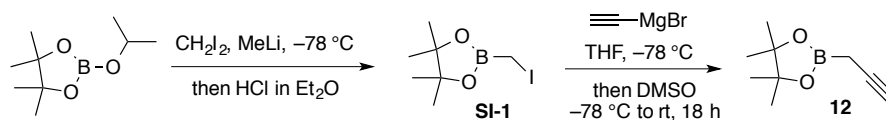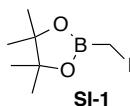

**2-(iodomethyl)-4,4,5,5-tetramethyl-1,3,2-dioxaborolane SI-1** was prepared according to a modified procedure described by Brown and co-workers,<sup>12</sup> using the following amounts of reagents: 2-isopropoxy-4,4,5,5-tetramethyl-1,3,2-dioxaborolane (17.7 mL, 86.9 mmol, 1.00 equiv), diiodomethane (7.00 mL, 86.9 mmol, 1.00 equiv), methyl lithium (52.3 mL, 86.9 mmol, 1.66 M in  $\text{Et}_2\text{O}$ , 1.00 equiv), THF (45 mL), and anhydrous HCl (93.0 mL, 93.0 mmol, 1.00 M in  $\text{Et}_2\text{O}$ , 1.07 equiv). The resulting red solution was filtered through a plug of silica gel (40 mL) eluting with 10%  $\text{Et}_2\text{O}$ /pentanes and concentrated in vacuo. Distillation twice through a short path distillation apparatus onto activated 4Å molecular sieves at 13.7 mmHg and  $T_{\text{vap}} = 95\text{ }^\circ\text{C}$  provided the title compound as a clear, colorless liquid (7.64 g, 28.5 mmol, 33%). Analytical data are consistent with literature values.<sup>12</sup> **TLC**  $R_f = 0.7$  (10%  $\text{Et}_2\text{O}$ /pentanes, stains blue with PAA);  **$^1\text{H NMR}$**  ( $\text{CDCl}_3$ , 400 MHz)  $\delta$  2.16 (s, 2H), 1.28 (s, 12 H);  **$^{13}\text{C NMR}$**  ( $\text{CDCl}_3$ , 125.7 MHz)  $\delta$  84.1, 24.5;  **$^{11}\text{B NMR}$**  ( $\text{CDCl}_3$ , 160.2 MHz)  $\delta$  31.7; **IR** (neat) 2977, 1322, 1142, 844, 673,  $577\text{ cm}^{-1}$ ; **HRMS** (TOF MS  $\text{CI}^+$ )  $m/z$  calcd for  $\text{C}_7\text{H}_{14}\text{BIO}_2$  ( $\text{M}^+$ ) 268.0133, found 268.0143.

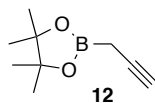

**Propargylboronic acid pinacol ester 12** was prepared according to a literature procedure by Fandrick and co-workers,<sup>4</sup> using the following amounts of reagents: **SI-1** (2.0 mL, 11 mmol, 1.0 equiv), ethynylmagnesium bromide (19.8 mL, 11.2 mmol, 0.566 M in THF, 1.02 equiv), THF (15 mL), and 1:1 THF/DMSO (24 mL). Distillation using a Kugelrohr distillation apparatus at 3–6 torr and  $T_{\text{vap}} = 60\text{ }^\circ\text{C}$  provided the title compound as a 96:4 mixture of propargyl borolane **12** and allenyl borolane **2** as a clear, colorless oil (0.37 g, 2.2 mmol, 20%). Analytical data for allenyl borolane **2** are consistent with literature values.<sup>3</sup> **TLC**  $R_f = 0.9$  (10%  $\text{Et}_2\text{O}$ /hexanes, stains blue with PAA);  **$^1\text{H NMR}$**  (400 MHz,  $\text{DMF-}d_7$ )  $\delta$  4.90 (t,  $J = 7.0\text{ Hz}$ , 1H), 4.71 (d,  $J = 7.0\text{ Hz}$ , 2H), 1.26 (s, 12H). Analytical data for propargyl borolane **12** are consistent with literature values.<sup>4</sup>  **$^1\text{H NMR}$**  (400 MHz,  $\text{DMF-}d_7$ )  $\delta$  2.46 (t,  $J = 2.9\text{ Hz}$ , 1H), 1.78 (d,  $J = 2.9\text{ Hz}$ , 2H), 1.26 (s, 12H);  **$^{13}\text{C NMR}$**  (125.7 MHz,  $\text{DMF-}d_7$ )  $\delta$  84.9, 81.9, 69.5, 25.3.

**Note:** We found that in order to obtain high ratios of propargyl borolane to allenyl borolane, it was necessary to use precisely 1.02 equivalents of ethynylmagnesium bromide relative to iodomethyl borolane **SI-1**. Excess Grignard reagent (1.1 equivalents) causes isomerization to allenyl borolane, while fewer than 1.0 equivalents of Grignard reagent results in low conversion to product (Figure SI-1).

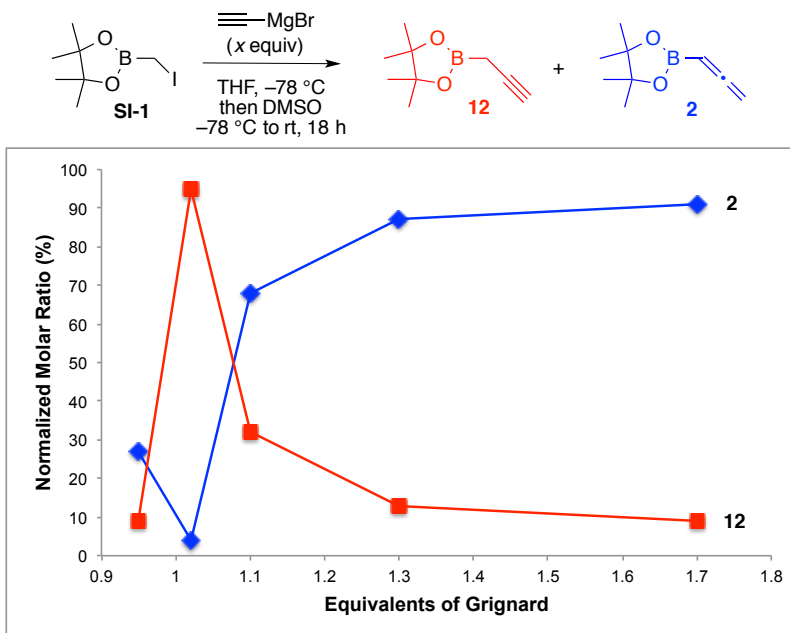

**Figure SI-1.** Isomerization of propargyl borolane **12** to allenyl borolane **2** in the presence of excess Grignard reagent.

## 2) CONTROL REACTIONS WITH **12**

### 1) ISOMERIZATION IN PRESENCE OF 8 MOL % BASE

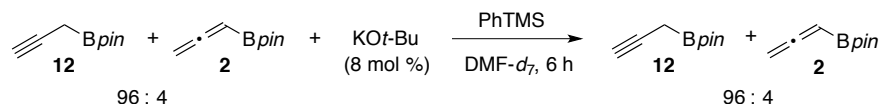

In a glovebox, a flame-dried vial was charged with potassium *tert*-butoxide (1.7 mg, 0.015 mmol, 0.076 equiv). *N,N*-Dimethylformamide-*d*<sub>7</sub> (+0.05% V/V TMS, 0.6 mL) was added from an ampule opened in the glovebox and the solution was transferred into an oven-dried NMR tube. The NMR tube was capped with a rubber septum, sealed with parafilm, and removed from the glovebox. Phenyltrimethylsilane (PhTMS, internal standard) (17.2  $\mu$ L, 0.100 mmol, 0.500 equiv) was added via syringe to the NMR tube through the septum, and the NMR tube was inverted to mix. An initial <sup>1</sup>H NMR spectrum was collected of the solution, after which propargyl borolane **12** (72  $\mu$ L, 0.40 mmol, 2.0 equiv) was added via syringe to the NMR tube through the septum, and the NMR tube was inverted to mix. A <sup>1</sup>H NMR spectrum was collected (1 minute after adding **12**, Figure SI-2a), followed by sequential <sup>1</sup>H NMR spectra collected at the time points listed below:

| Time elapsed | Ratio <b>12</b> : <b>2</b> |
|--------------|----------------------------|
| 1 min        | 96:4                       |
| 4 min        | 96:4                       |
| 7 min        | 96:4                       |
| 9 min        | 96:4                       |
| 10 min       | 96:4                       |
| 15 min       | 96:4                       |
| 20 min       | 96:4                       |
| 30 min       | 96:4                       |
| 40 min       | 96:4                       |
| 1 h          | 96:4                       |
| 3 h          | 96:4                       |
| 6 h          | 96:4                       |

Isomerization of propargyl borolane in 8 mol % base

a) after 1 min

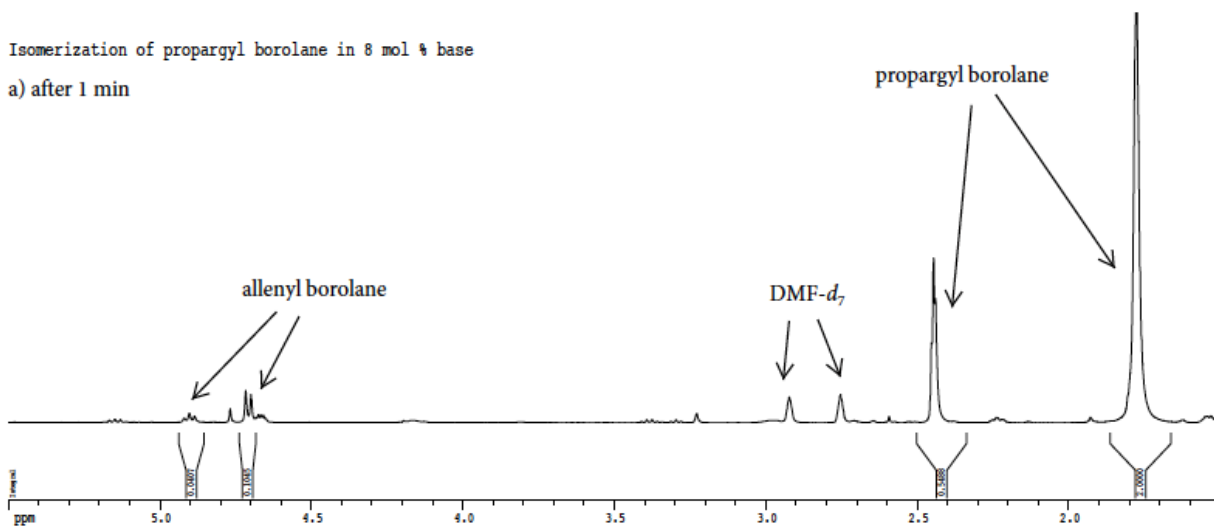

b) after 6 h

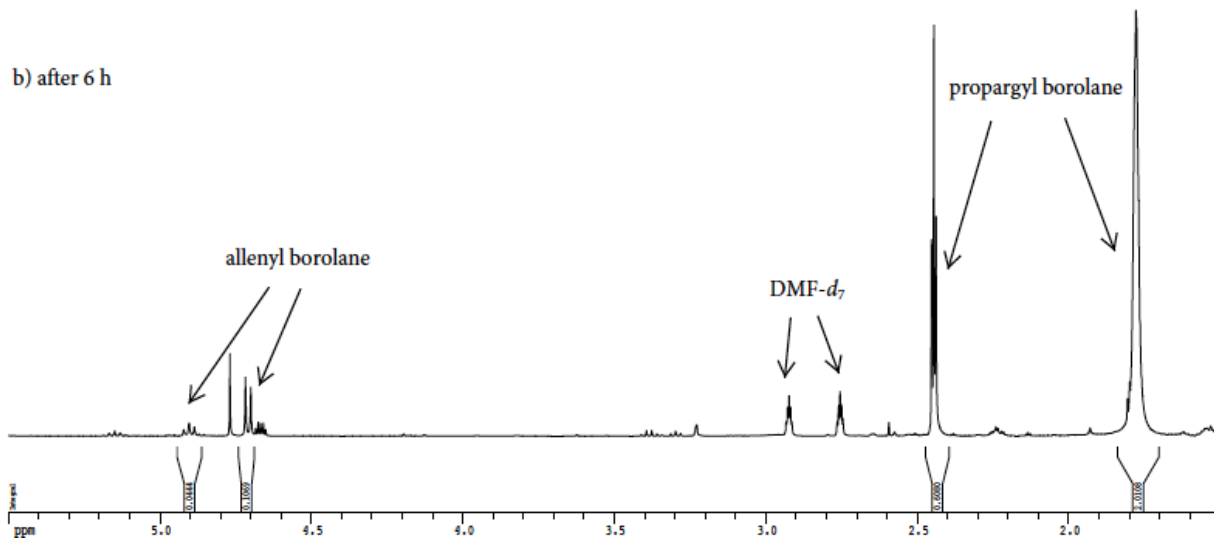

**Figure SI-2.** Absence of isomerization of propargyl borolane **12** in the presence of 8 mol % KO*t*-Bu at RT.

## II) ISOMERIZATION IN PRESENCE OF 20 MOL % BASE

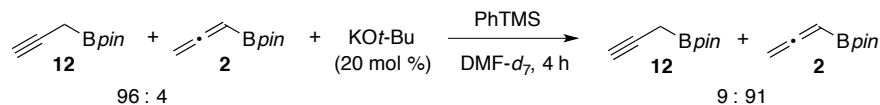

In a glovebox, a flame-dried vial was charged with potassium *tert*-butoxide (4.5 mg, 0.040 mmol, 0.20 equiv). *N,N*-Dimethylformamide-*d*<sub>7</sub> (+0.05% V/V TMS, 0.6 mL) was added from an ampule opened in the glovebox and the solution was transferred into an oven-dried NMR tube. The NMR tube was capped with a rubber septum, sealed with parafilm, and removed from the glovebox. Phenyltrimethylsilane (PhTMS, internal standard) (17.2  $\mu$ L, 0.100 mmol, 0.500 equiv) was added via syringe to the NMR tube through the septum, and the NMR tube was inverted to mix. An initial <sup>1</sup>H NMR spectrum was collected, after which propargyl borolane **12** (72  $\mu$ L, 0.40 mmol, 2.0 equiv) was added via syringe to the NMR tube through the septum, and the NMR tube was inverted to mix. A <sup>1</sup>H NMR spectrum was collected (1 minute after adding **12**, Figure SI-3a), followed by sequential <sup>1</sup>H NMR spectra collected at the time points listed below:

| Time elapsed | Ratio 12 : 2 |
|--------------|--------------|
| 1 min        | 92:8         |
| 5 min        | 87:13        |
| 8 min        | 84:16        |
| 10 min       | 82:18        |
| 20 min       | 69:31        |
| 30 min       | 64:36        |
| 35 min       | 60:40        |
| 40 min       | 57:43        |
| 1 h          | 46:54        |
| 2 h          | 27:73        |
| 3 h          | 18:82        |
| 4 h          | 9:91         |



Isomerization of propargyl borolane in presence of 20 mol % base  
a) after 1 min

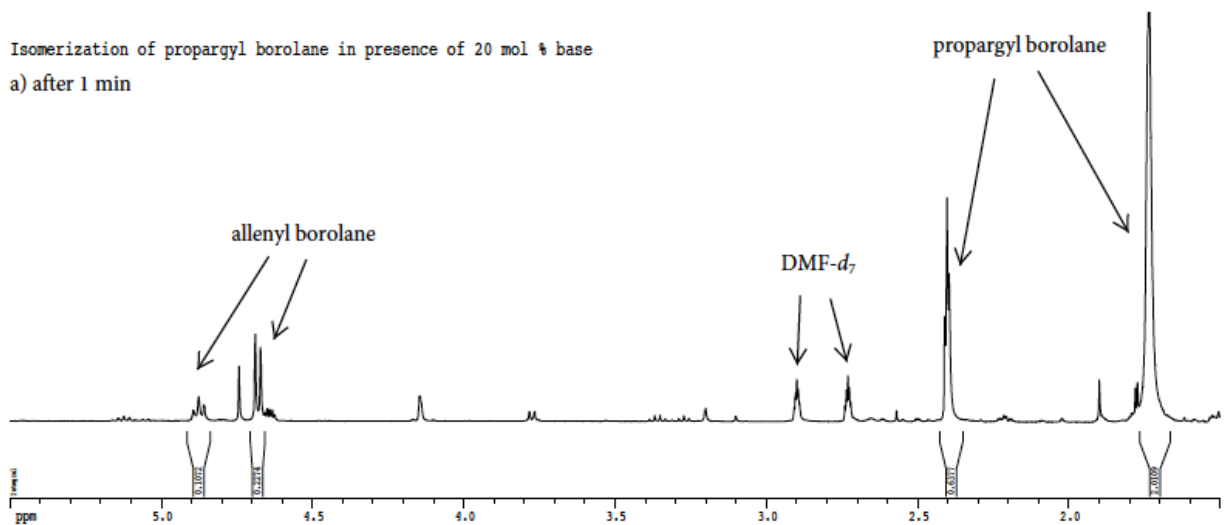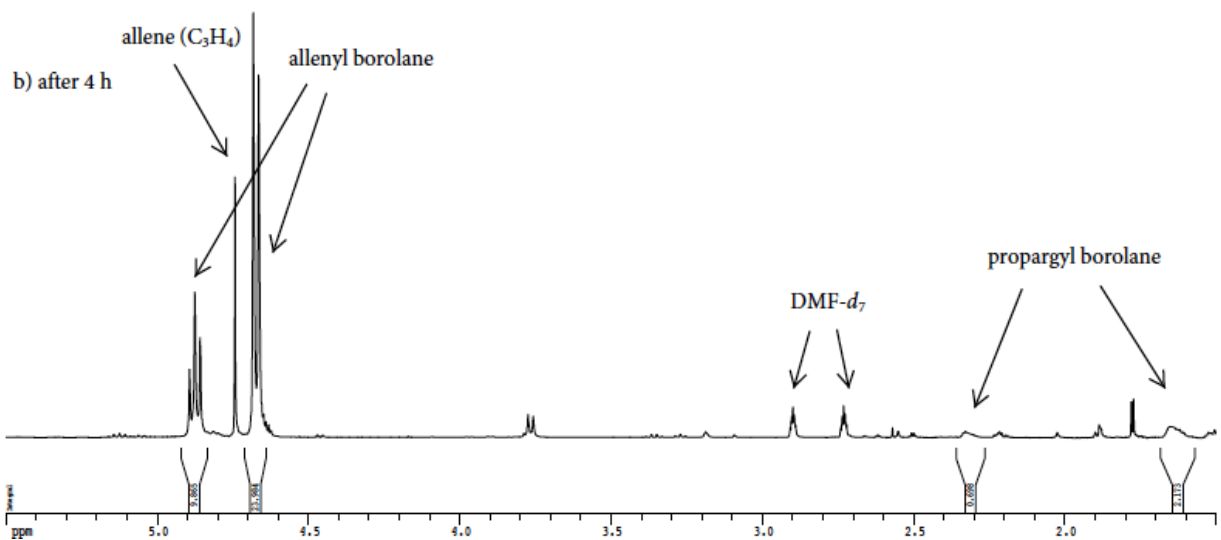

**Figure SI-3.** Isomerization of propargyl borolane **12** to allenyl borolane **2** in the presence of 20 mol % KO*t*-Bu at RT.

### 3) MECHANISTIC STUDIES WITH BOROLANE REAGENTS

We were interested in distinguishing between two of the most likely mechanisms for this propargylation reaction: transmetalation of the silver catalyst with the borolane reagent (Mechanism A), or Lewis acid catalysis (Mechanism B). To distinguish between these mechanisms, we examined reactions employing propargyl borolane reagent **12** while lowering the base loading to 8 mol %. This experimental modification was performed to minimize isomerization of **12** to allenyl borolane **2** (see Section 2-G-II, *vide supra*). We also performed the reactions in deuterated solvent in order to determine the ratio of **12** to **2** by  $^1\text{H}$  NMR immediately after the reaction.

A control reaction using allenyl borolane **2** (Table 2, entry 1) demonstrated that under these conditions, alkyne **3a** was formed in 68% yield with 28% recovered starting material **1a** (*vide infra*). Using propargyl borolane **12** in the reaction (Table 2, entry 2) yielded alkyne **3a** in 64% yield with 32% recovered starting material **1a** (*vide infra*). This product distribution is most consistent with Mechanism A.

**Note:** All manipulations involving silver-catalyzed reactions were performed in the absence of direct light, using vials and NMR tubes wrapped in aluminum foil.

#### 1) REACTION USING ALLENYL BOROLANE **2** (TABLE 2, ENTRY 1)

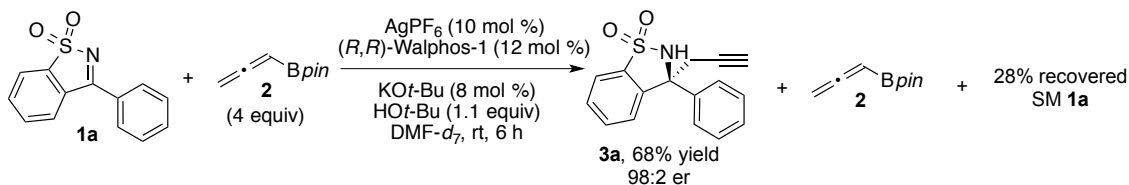

In a glovebox, an oven-dried 1.0 mL conical vial equipped with a triangular stir bar was charged with  $\text{AgPF}_6$  (5.0 mg, 0.020 mmol, 0.10 equiv) and Walphos W001-1 (22.3 mg, 0.0240 mmol, 0.102 equiv). The vial was sealed with a screw-top cap fit with a septum and  $\text{DMF-}d_7$  (+0.05% V/V TMS, 400  $\mu\text{L}$ ) was added from an ampule opened in the glovebox. The vial was removed from the glovebox and the solution was stirred for 5 min at rt. The  $\text{N}_2$  line was then removed and the solution was stirred for 30 min at 70  $^\circ\text{C}$ , then cooled to rt over 15 min.

To the catalyst solution was added *tert*-butanol (21  $\mu\text{L}$ , 0.22 mmol, 1.1 equiv), followed by potassium *tert*-butoxide (1.7 mg, 0.015 mmol, 0.076 equiv) and phenyl ketimine **1a** (48.6 mg, 0.200 mmol, 1.00 equiv) under a flow of  $\text{N}_2$ . The reaction was stirred at rt for 5 min to dissolve the ketimine. Allenylboronic acid pinacol ester **2** (72  $\mu\text{L}$ , 0.40 mmol, 2.0 equiv) was added via syringe, followed by another portion of allenylboronic acid pinacol ester (72  $\mu\text{L}$ , 0.40 mmol, 2.0 equiv) added via slow addition over 3 h using a syringe pump. The  $\text{N}_2$  line was removed and the reaction was stirred at 22  $^\circ\text{C}$  for another 3 h. The reaction mixture in  $\text{DMF-}d_7$  was transferred to an NMR tube and the ratio of allenyl borolane **2** to propargyl borolane **12** was determined to be 94:6 by  $^1\text{H}$  NMR (Figure SI-4). The mixture was then filtered through a plug of silica gel eluting with 100%  $\text{Et}_2\text{O}$  to remove the catalyst.  $\text{Et}_2\text{O}$  was removed in vacuo and the resulting residue

was purified by silica gel chromatography using 0–1% TEA/benzene to separate product from unreacted starting material. The mixture was purified again by flash column chromatography using 5–10–20% EtOAc/hexanes (1% TEA) to separate product from excess ligand and afford alkyne **3a** as a white solid (38.5 mg, 0.136 mmol, 68%, 98:2 er). Analytical data are consistent with the values listed in Section II-C (vide supra). SFC analysis (OD-H, 10% IPA, 3.0 mL/min, 215 nm) indicated 98:2 er:  $t_R$  (minor) = 11.8 min,  $t_R$  (major) = 13.7 min.

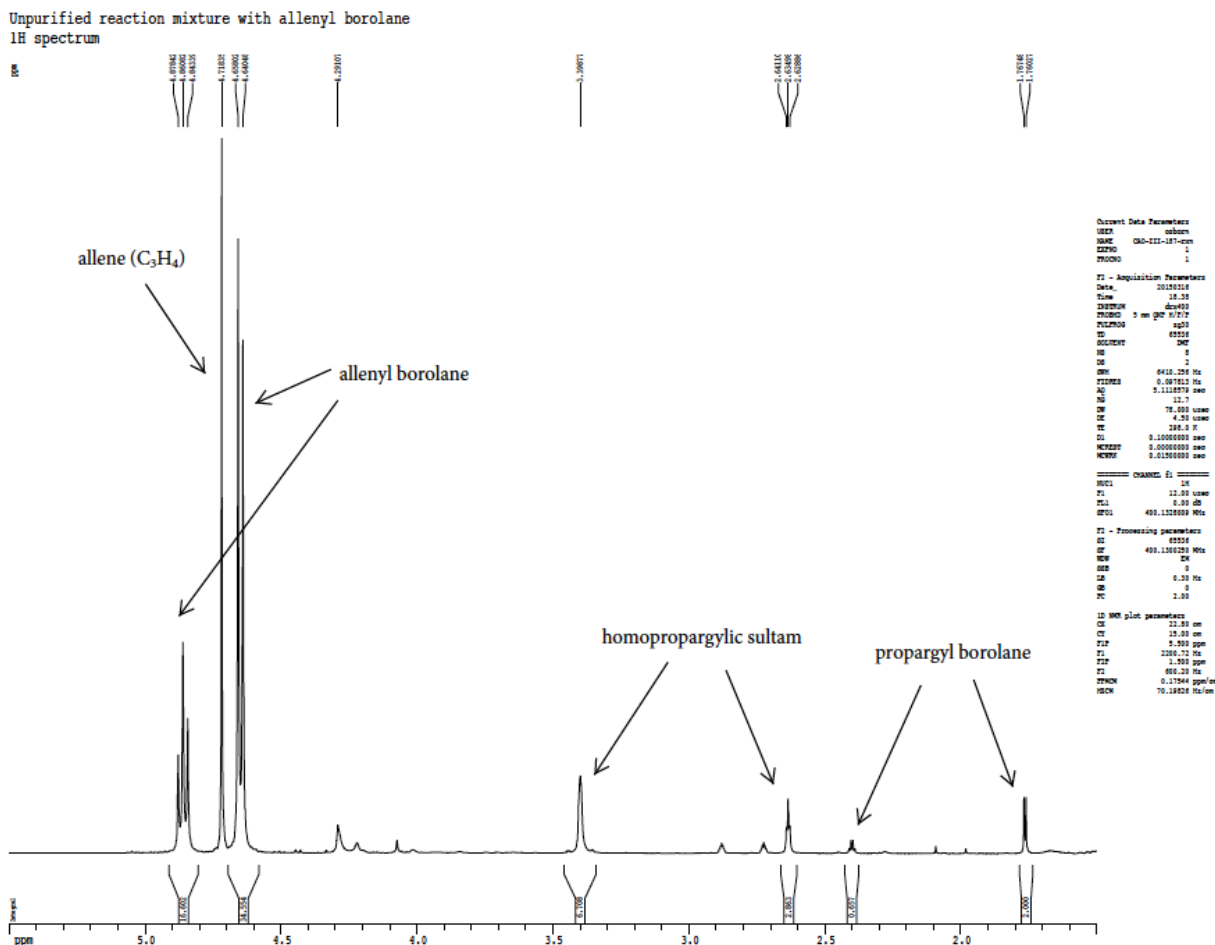

Figure SI-4. Unpurified reaction mixture in DMF-*d*<sub>7</sub>.

## II) REACTION USING PROPARGYL BOROLANE **12** (TABLE 2, ENTRY 2)

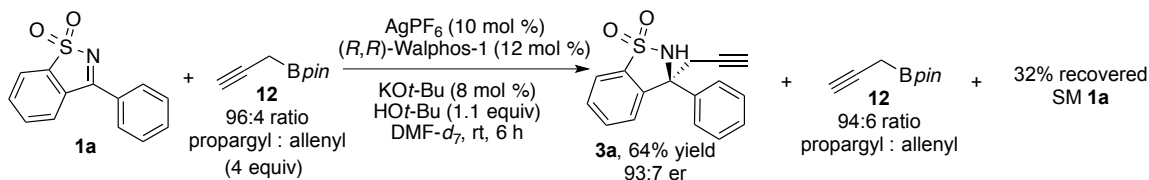

In a glovebox, an oven-dried 1.0 mL conical vial equipped with a triangular stir bar was charged with  $\text{AgPF}_6$  (5.0 mg, 0.020 mmol, 0.10 equiv) and Walphos W001-1 (22.3 mg, 0.0240 mmol, 0.120 equiv). The vial was sealed with a screw-top cap fit with a septum and  $\text{DMF-}d_7$  (+0.05% V/V TMS, 400  $\mu\text{L}$ ) was added from an ampule opened in the glovebox. The vial was removed from the glovebox and the solution was stirred for 5 min at rt. The  $\text{N}_2$  line was then removed and the solution was stirred for 30 min at 70  $^\circ\text{C}$ , then cooled to rt over 15 min.

To the catalyst solution was added *tert*-butanol (21  $\mu\text{L}$ , 0.22 mmol, 1.1 equiv), followed by potassium *tert*-butoxide (1.7 mg, 0.015 mmol, 0.076 equiv) and phenyl ketimine **1a** (48.6 mg, 0.200 mmol, 1.00 equiv) under a flow of  $\text{N}_2$ . The reaction was stirred at rt for 5 min to dissolve the ketimine. Propargylboronic acid pinacol ester **12** (72  $\mu\text{L}$ , 0.40 mmol, 2.0 equiv) was added via syringe, followed by another portion of propargylboronic acid pinacol ester (72  $\mu\text{L}$ , 0.40 mmol, 2.0 equiv) added via slow addition over 3 h using a syringe pump. The  $\text{N}_2$  line was removed and the reaction was stirred at 22  $^\circ\text{C}$  for another 3 h. The reaction mixture in  $\text{DMF-}d_7$  was transferred to an NMR tube and the ratio of propargyl borolane **12** to allenyl borolane **2** was determined to be 94:6 by  $^1\text{H}$  NMR (Figure SI-5). The mixture was then filtered through a plug of silica gel eluting with 100%  $\text{Et}_2\text{O}$  to remove the catalyst.  $\text{Et}_2\text{O}$  was removed in vacuo and the resulting residue was purified by silica gel chromatography using 0–1% TEA/benzene to separate product from unreacted starting material. The mixture was purified again by flash column chromatography using 5–10–20%  $\text{EtOAc}$ /hexanes (1% TEA) to separate product from excess ligand and afford alkyne **3a** as a white solid (36.5 mg, 0.129 mmol, 64%, 93:7 er). Analytical data are consistent with the values listed in Section II-C (vide supra). SFC analysis (OD-H, 10% IPA, 3.0 mL/min, 215 nm) indicated 93:7 er:  $t_{\text{R}}$  (minor) = 11.8 min,  $t_{\text{R}}$  (major) = 13.7 min.

Unpurified reaction mixture with propargyl borolane  
 1H spectrum

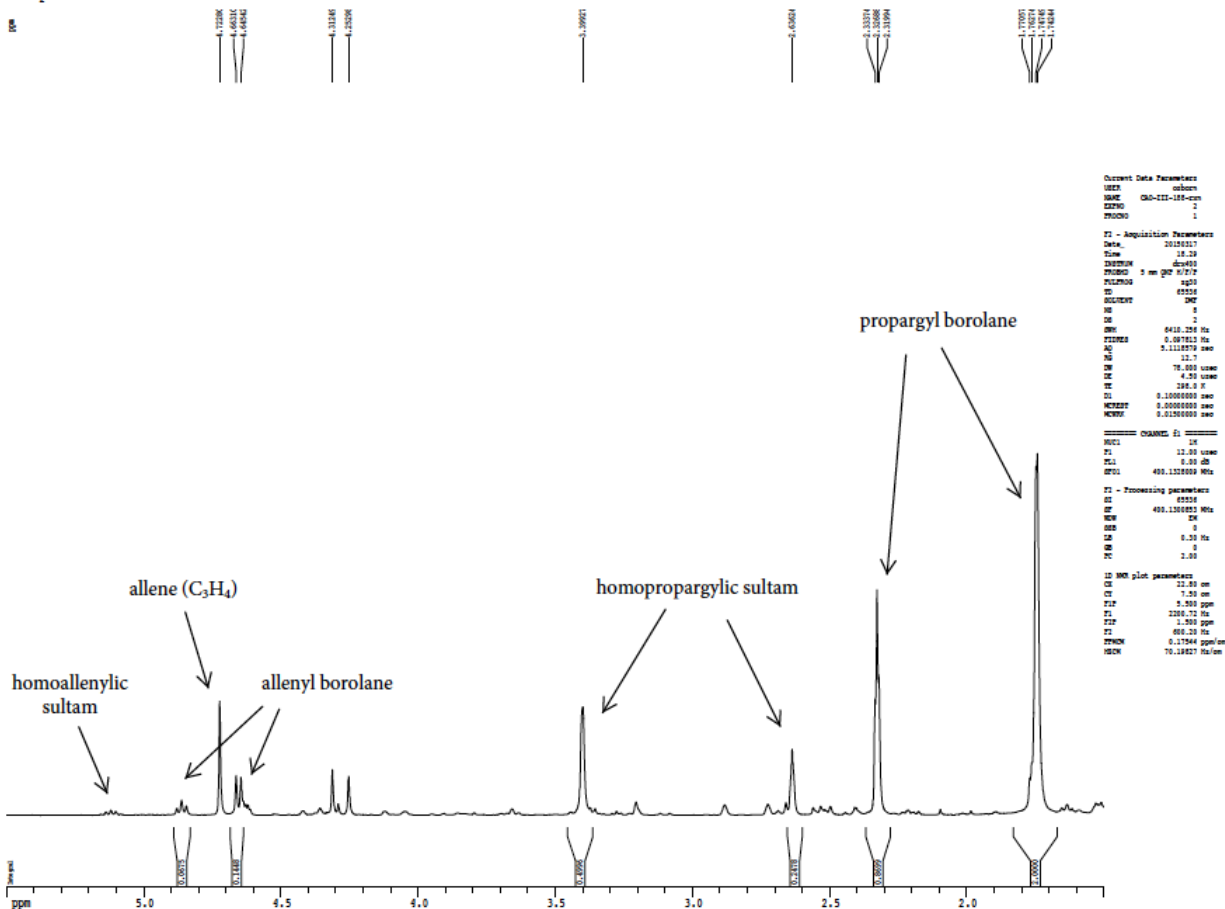

Figure SI-5. Unpurified reaction mixture in DMF-*d*<sub>7</sub>.

### III. REFERENCES

- 
- <sup>1</sup> Krasovskiy, A.; Knochel, P. *Synthesis* **2006**, 5, 890.
  - <sup>2</sup> Love, B. E.; Jones, E. G. *J. Org. Chem.* **1999**, 64, 3755.
  - <sup>3</sup> Tonogaki, K.; Itami, K.; Yoshida, J.-i. *J. Am. Chem. Soc.* **2006**, 128, 1464.
  - <sup>4</sup> Fandrick, D. R.; Saha, J.; Fandrick, K. R.; Sanyal, S.; Ogikubo, J.; Lee, H.; Roschangar, F.; Song, J. J.; Senanayake, C. H. *Org. Lett.* **2011**, 13, 5616.
  - <sup>5</sup> Nishimura, T.; Noishiki, A.; Tsui, G. C.; Hayashi, T. *J. Am. Chem. Soc.* **2012**, 134, 5056.
  - <sup>6</sup> Rommel, M.; Fukuzumi, T.; Bode, J. W. *J. Am. Chem. Soc.* **2008**, 130, 17266,
  - <sup>7</sup> Jiang, C.; Lu, Y.; Hayashi, T. *Angew. Chem., Int. Ed.* **2014**, 53, 9936.
  - <sup>8</sup> Paderes M. C.; Chemler, S. R. *Org. Lett.* **2009**, 11, 1915.
  - <sup>9</sup> Mori, M.; Sakakibara N.; Kinoshita, A. *J. Org. Chem.* **1998**, 63, 6082.
  - <sup>10</sup> Oestreich, M.; Fröhlich, R.; Hoppe, D. *J. Org. Chem.* **1999**, 64, 8616.
  - <sup>11</sup> Harris, M. R.; Konev, M. O.; Jarvo, E. R. *J. Am. Chem. Soc.* **2014**, 136, 7825.
  - <sup>12</sup> Roy, C. D.; Soundararajan, R.; Brown, H. C. *Monatsch. Chem.* **2008**, 139, 241.

## IV. CRYSTALLOGRAPHIC DATA

### A. X-ray Data Collection, Structure Solution and Refinement for (S)-3a:

CCDC 1405841

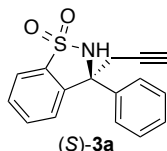

A single crystal was grown from Et<sub>2</sub>O with slow diffusion of pentanes at room temperature. A colorless crystal of approximate dimensions 0.250 x 0.196 x 0.182 mm was mounted on a glass fiber and transferred to a Bruker SMART APEX II diffractometer. The APEX2<sup>1</sup> program package was used to determine the unit-cell parameters and for data collection (60 sec/frame scan time for a sphere of diffraction data). The raw frame data was processed using SAINT<sup>2</sup> and SADABS<sup>3</sup> to yield the reflection data file. Subsequent calculations were carried out using the SHELXTL<sup>4</sup> program. The diffraction symmetry was *4/m* and the systematic absences were consistent with the tetragonal space group *P4*<sub>3</sub> that was later determined to be correct.

The structure was solved by direct methods and refined on *F*<sup>2</sup> by full-matrix least-squares techniques. The analytical scattering factors<sup>5</sup> for neutral atoms were used throughout the analysis. Hydrogen atoms were located from a difference-Fourier map and refined (*x*,*y*,*z* and *U*<sub>iso</sub>).

At convergence, *wR*<sub>2</sub> = 0.0661 and *Goof* = 1.065 for 233 variables refined against 3225 data (0.74 Å), *R*<sub>1</sub> = 0.0269 for those 3084 data with *I* > 2.0σ(*I*). The absolute structure was assigned by refinement of the Flack parameter<sup>6</sup>.

**References.**

1. APEX2 Version 2014.9-0, Bruker AXS, Inc.; Madison, WI 2014.
  2. SAINT Version 8.34a, Bruker AXS, Inc.; Madison, WI 2013.
  3. Sheldrick, G. M. SADABS, Version 2014/4, Bruker AXS, Inc.; Madison, WI 2014.
  4. Sheldrick, G. M. SHELXTL, Version 2014/7, Bruker AXS, Inc.; Madison, WI 2014.
  5. International Tables for Crystallography 1992, Vol. C., Dordrecht: Kluwer Academic Publishers.
  6. Parsons, S., Flack, H. D., Wagner, T. Acta Cryst. B69, 249-259, 2013.
- 

**Definitions:**

$$wR2 = [\Sigma[w(F_o^2 - F_c^2)^2] / \Sigma[w(F_o^2)^2]]^{1/2}$$

$$R1 = \Sigma||F_o| - |F_c|| / \Sigma|F_o|$$

Goof = S =  $[\Sigma[w(F_o^2 - F_c^2)^2] / (n-p)]^{1/2}$  where n is the number of reflections and p is the total number of parameters refined.

The thermal ellipsoid plot is shown at the 50% probability level.



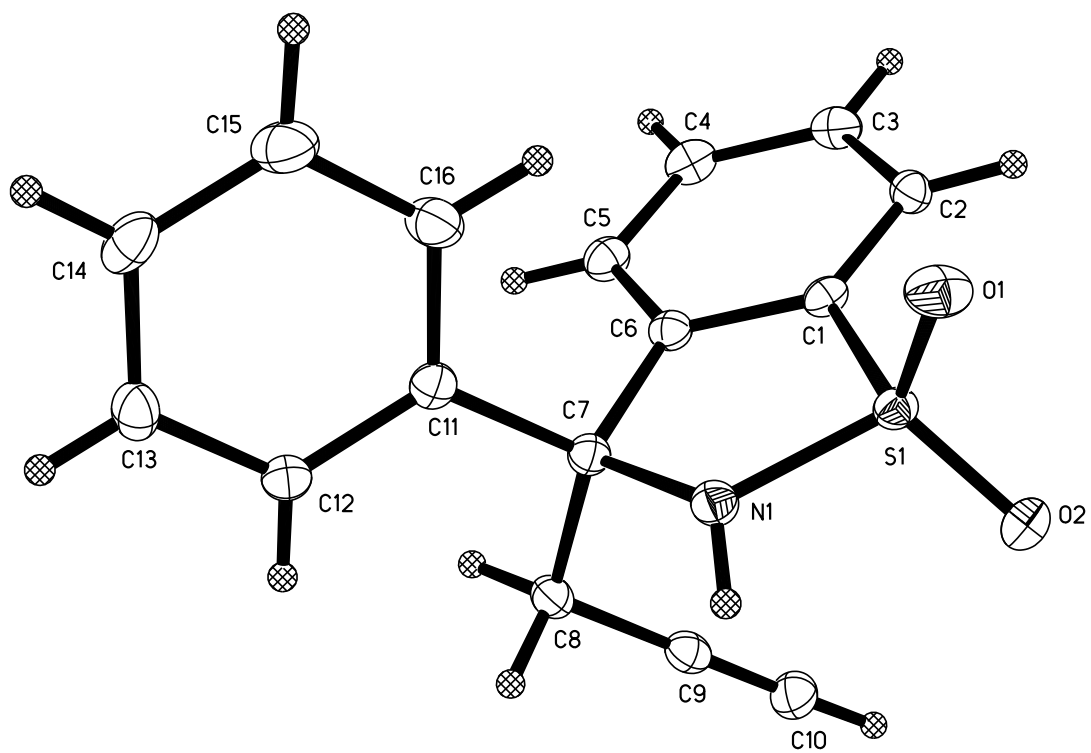

Table 1. Crystal data and structure refinement for erj21.

|                                         |                                                   |          |
|-----------------------------------------|---------------------------------------------------|----------|
| Identification code                     | erj21 (Thomas Endean)                             |          |
| Empirical formula                       | C <sub>16</sub> H <sub>13</sub> NO <sub>2</sub> S |          |
| Formula weight                          | 283.33                                            |          |
| Temperature                             | 133(2) K                                          |          |
| Wavelength                              | 0.71073 Å                                         |          |
| Crystal system                          | Tetragonal                                        |          |
| Space group                             | P4 <sub>3</sub>                                   |          |
| Unit cell dimensions                    | a = 10.7582(6) Å                                  | a = 90°. |
|                                         | b = 10.7582(6) Å                                  | b = 90°. |
|                                         | c = 11.4283(7) Å                                  | g = 90°. |
| Volume                                  | 1322.70(17) Å <sup>3</sup>                        |          |
| Z                                       | 4                                                 |          |
| Density (calculated)                    | 1.423 Mg/m <sup>3</sup>                           |          |
| Absorption coefficient                  | 0.245 mm <sup>-1</sup>                            |          |
| F(000)                                  | 592                                               |          |
| Crystal color                           | colorless                                         |          |
| Crystal size                            | 0.250 x 0.196 x 0.182 mm <sup>3</sup>             |          |
| Theta range for data collection         | 1.893 to 28.656°                                  |          |
| Index ranges                            | -13 ≤ h ≤ 13, -14 ≤ k ≤ 14, -14 ≤ l ≤ 15          |          |
| Reflections collected                   | 15344                                             |          |
| Independent reflections                 | 3225 [R(int) = 0.0270]                            |          |
| Completeness to theta = 25.500°         | 100.0 %                                           |          |
| Absorption correction                   | Numerical                                         |          |
| Max. and min. transmission              | 1.0000 and 0.9257                                 |          |
| Refinement method                       | Full-matrix least-squares on F <sup>2</sup>       |          |
| Data / restraints / parameters          | 3225 / 1 / 233                                    |          |
| Goodness-of-fit on F <sup>2</sup>       | 1.065                                             |          |
| Final R indices [I > 2σ(I) = 3084 data] | R1 = 0.0269, wR2 = 0.0645                         |          |
| R indices (all data, 0.74 Å)            | R1 = 0.0295, wR2 = 0.0661                         |          |

|                              |                                    |
|------------------------------|------------------------------------|
| Absolute structure parameter | -0.04(3)                           |
| Largest diff. peak and hole  | 0.306 and -0.185 e.Å <sup>-3</sup> |

Table 2. Atomic coordinates ( $\times 10^4$ ) and equivalent isotropic displacement parameters ( $\text{\AA}^2 \times 10^3$ ) for erj21.  $U(\text{eq})$  is defined as one third of the trace of the orthogonalized  $U^{ij}$  tensor.

|       | x        | y       | z        | $U(\text{eq})$ |
|-------|----------|---------|----------|----------------|
| S(1)  | 7902(1)  | 4294(1) | 1443(1)  | 13(1)          |
| O(1)  | 7584(2)  | 5501(1) | 978(1)   | 21(1)          |
| O(2)  | 8458(2)  | 4312(1) | 2587(1)  | 20(1)          |
| N(1)  | 6713(2)  | 3349(2) | 1387(2)  | 15(1)          |
| C(1)  | 8771(2)  | 3469(2) | 396(2)   | 13(1)          |
| C(2)  | 9948(2)  | 3779(2) | -26(2)   | 15(1)          |
| C(3)  | 10465(2) | 3013(2) | -878(2)  | 18(1)          |
| C(4)  | 9807(2)  | 1980(2) | -1283(2) | 18(1)          |
| C(5)  | 8630(2)  | 1691(2) | -859(2)  | 17(1)          |
| C(6)  | 8104(2)  | 2453(2) | -4(2)    | 14(1)          |
| C(7)  | 6834(2)  | 2280(2) | 570(2)   | 13(1)          |
| C(8)  | 6822(2)  | 1046(2) | 1277(2)  | 16(1)          |
| C(9)  | 7837(2)  | 986(2)  | 2134(2)  | 16(1)          |
| C(10) | 8653(2)  | 950(2)  | 2833(2)  | 20(1)          |
| C(11) | 5777(2)  | 2333(2) | -340(2)  | 14(1)          |
| C(12) | 4743(2)  | 1553(2) | -280(2)  | 16(1)          |
| C(13) | 3790(2)  | 1650(2) | -1105(2) | 20(1)          |
| C(14) | 3859(2)  | 2518(2) | -2002(2) | 22(1)          |
| C(15) | 4885(2)  | 3302(2) | -2060(2) | 24(1)          |
| C(16) | 5830(2)  | 3214(2) | -1232(2) | 21(1)          |

Table 3. Bond lengths [Å] and angles [°] for *erj21*.

---

|             |            |
|-------------|------------|
| S(1)-O(2)   | 1.4373(16) |
| S(1)-O(1)   | 1.4446(15) |
| S(1)-N(1)   | 1.6351(17) |
| S(1)-C(1)   | 1.758(2)   |
| N(1)-C(7)   | 1.487(3)   |
| N(1)-H(1)   | 0.81(3)    |
| C(1)-C(6)   | 1.386(3)   |
| C(1)-C(2)   | 1.395(3)   |
| C(2)-C(3)   | 1.392(3)   |
| C(2)-H(2)   | 0.91(3)    |
| C(3)-C(4)   | 1.396(3)   |
| C(3)-H(3)   | 0.98(3)    |
| C(4)-C(5)   | 1.391(3)   |
| C(4)-H(4)   | 0.94(3)    |
| C(5)-C(6)   | 1.395(3)   |
| C(5)-H(5)   | 0.90(3)    |
| C(6)-C(7)   | 1.527(3)   |
| C(7)-C(11)  | 1.542(3)   |
| C(7)-C(8)   | 1.554(3)   |
| C(8)-C(9)   | 1.469(3)   |
| C(8)-H(8A)  | 0.94(2)    |
| C(8)-H(8B)  | 1.01(3)    |
| C(9)-C(10)  | 1.187(3)   |
| C(10)-H(10) | 0.93(4)    |
| C(11)-C(16) | 1.393(3)   |
| C(11)-C(12) | 1.395(3)   |
| C(12)-C(13) | 1.397(3)   |
| C(12)-H(12) | 0.89(3)    |

|                |            |
|----------------|------------|
| C(13)-C(14)    | 1.388(3)   |
| C(13)-H(13)    | 0.87(3)    |
| C(14)-C(15)    | 1.391(3)   |
| C(14)-H(14)    | 0.90(3)    |
| C(15)-C(16)    | 1.392(3)   |
| C(15)-H(15)    | 0.92(4)    |
| C(16)-H(16)    | 0.95(3)    |
| O(2)-S(1)-O(1) | 114.86(10) |
| O(2)-S(1)-N(1) | 111.71(10) |
| O(1)-S(1)-N(1) | 111.03(10) |
| O(2)-S(1)-C(1) | 113.88(9)  |
| O(1)-S(1)-C(1) | 109.23(9)  |
| N(1)-S(1)-C(1) | 94.34(9)   |
| C(7)-N(1)-S(1) | 115.92(13) |
| C(7)-N(1)-H(1) | 116.9(19)  |
| S(1)-N(1)-H(1) | 112(2)     |
| C(6)-C(1)-C(2) | 122.99(19) |
| C(6)-C(1)-S(1) | 110.32(15) |
| C(2)-C(1)-S(1) | 126.66(16) |
| C(3)-C(2)-C(1) | 117.60(19) |
| C(3)-C(2)-H(2) | 118.0(16)  |
| C(1)-C(2)-H(2) | 124.4(16)  |
| C(2)-C(3)-C(4) | 120.00(19) |
| C(2)-C(3)-H(3) | 119.5(16)  |
| C(4)-C(3)-H(3) | 120.5(16)  |
| C(5)-C(4)-C(3) | 121.6(2)   |
| C(5)-C(4)-H(4) | 119.2(19)  |
| C(3)-C(4)-H(4) | 119.2(19)  |
| C(4)-C(5)-C(6) | 118.9(2)   |

|                   |            |
|-------------------|------------|
| C(4)-C(5)-H(5)    | 121(2)     |
| C(6)-C(5)-H(5)    | 120(2)     |
| C(1)-C(6)-C(5)    | 118.95(18) |
| C(1)-C(6)-C(7)    | 114.70(17) |
| C(5)-C(6)-C(7)    | 126.34(18) |
| N(1)-C(7)-C(6)    | 104.68(15) |
| N(1)-C(7)-C(11)   | 109.29(16) |
| C(6)-C(7)-C(11)   | 111.43(16) |
| N(1)-C(7)-C(8)    | 109.52(16) |
| C(6)-C(7)-C(8)    | 109.54(16) |
| C(11)-C(7)-C(8)   | 112.11(16) |
| C(9)-C(8)-C(7)    | 112.23(17) |
| C(9)-C(8)-H(8A)   | 106.2(15)  |
| C(7)-C(8)-H(8A)   | 111.0(14)  |
| C(9)-C(8)-H(8B)   | 111.6(14)  |
| C(7)-C(8)-H(8B)   | 109.0(14)  |
| H(8A)-C(8)-H(8B)  | 106.7(19)  |
| C(10)-C(9)-C(8)   | 179.2(2)   |
| C(9)-C(10)-H(10)  | 178(2)     |
| C(16)-C(11)-C(12) | 118.56(19) |
| C(16)-C(11)-C(7)  | 119.24(18) |
| C(12)-C(11)-C(7)  | 122.16(19) |
| C(11)-C(12)-C(13) | 120.5(2)   |
| C(11)-C(12)-H(12) | 121.3(17)  |
| C(13)-C(12)-H(12) | 118.2(17)  |
| C(14)-C(13)-C(12) | 120.6(2)   |
| C(14)-C(13)-H(13) | 119(2)     |
| C(12)-C(13)-H(13) | 120(2)     |
| C(13)-C(14)-C(15) | 119.1(2)   |
| C(13)-C(14)-H(14) | 121.6(18)  |

|                   |           |
|-------------------|-----------|
| C(15)-C(14)-H(14) | 119.3(18) |
| C(14)-C(15)-C(16) | 120.4(2)  |
| C(14)-C(15)-H(15) | 124(2)    |
| C(16)-C(15)-H(15) | 116(2)    |
| C(15)-C(16)-C(11) | 120.9(2)  |
| C(15)-C(16)-H(16) | 120.1(16) |
| C(11)-C(16)-H(16) | 119.0(16) |

---



Table 4. Anisotropic displacement parameters ( $\text{\AA}^2 \times 10^3$ ) for erj21. The anisotropic displacement factor exponent takes the form:  $-2p^2[ h^2 a^{*2}U^{11} + \dots + 2 h k a^* b^* U^{12} ]$

|       | U <sup>11</sup> | U <sup>22</sup> | U <sup>33</sup> | U <sup>23</sup> | U <sup>13</sup> | U <sup>12</sup> |
|-------|-----------------|-----------------|-----------------|-----------------|-----------------|-----------------|
| S(1)  | 16(1)           | 12(1)           | 12(1)           | 0(1)            | 0(1)            | 1(1)            |
| O(1)  | 30(1)           | 14(1)           | 20(1)           | 2(1)            | 4(1)            | 5(1)            |
| O(2)  | 22(1)           | 22(1)           | 14(1)           | -2(1)           | -3(1)           | -2(1)           |
| N(1)  | 15(1)           | 16(1)           | 14(1)           | -2(1)           | 3(1)            | -1(1)           |
| C(1)  | 15(1)           | 14(1)           | 11(1)           | 0(1)            | -1(1)           | 3(1)            |
| C(2)  | 14(1)           | 16(1)           | 16(1)           | 2(1)            | -3(1)           | -1(1)           |
| C(3)  | 12(1)           | 23(1)           | 18(1)           | 4(1)            | 1(1)            | 3(1)            |
| C(4)  | 19(1)           | 20(1)           | 16(1)           | 0(1)            | 1(1)            | 6(1)            |
| C(5)  | 20(1)           | 16(1)           | 15(1)           | -1(1)           | 0(1)            | 2(1)            |
| C(6)  | 13(1)           | 14(1)           | 13(1)           | 2(1)            | -1(1)           | 1(1)            |
| C(7)  | 13(1)           | 15(1)           | 13(1)           | -1(1)           | 1(1)            | 0(1)            |
| C(8)  | 15(1)           | 15(1)           | 17(1)           | 2(1)            | 0(1)            | -2(1)           |
| C(9)  | 18(1)           | 13(1)           | 18(1)           | 1(1)            | 2(1)            | -1(1)           |
| C(10) | 22(1)           | 20(1)           | 19(1)           | 2(1)            | -2(1)           | -1(1)           |
| C(11) | 13(1)           | 17(1)           | 13(1)           | -2(1)           | 2(1)            | 2(1)            |
| C(12) | 17(1)           | 18(1)           | 14(1)           | 0(1)            | 2(1)            | 0(1)            |
| C(13) | 13(1)           | 25(1)           | 20(1)           | -4(1)           | 1(1)            | -1(1)           |
| C(14) | 16(1)           | 32(1)           | 16(1)           | -2(1)           | -3(1)           | 6(1)            |
| C(15) | 22(1)           | 30(1)           | 21(1)           | 9(1)            | 0(1)            | 3(1)            |
| C(16) | 17(1)           | 24(1)           | 22(1)           | 6(1)            | 1(1)            | -1(1)           |

Table 5. Hydrogen coordinates ( $\times 10^4$ ) and isotropic displacement parameters ( $\text{\AA}^2 \times 10^{-3}$ ) for erj21.

|       | x         | y        | z         | U(eq) |
|-------|-----------|----------|-----------|-------|
| H(1)  | 6440(30)  | 3200(20) | 2030(30)  | 20(7) |
| H(2)  | 10390(20) | 4460(20) | 210(20)   | 14(6) |
| H(3)  | 11290(30) | 3210(20) | -1190(30) | 22(7) |
| H(4)  | 10170(30) | 1470(30) | -1850(30) | 34(8) |
| H(5)  | 8220(30)  | 1010(30) | -1120(30) | 34(8) |
| H(8A) | 6080(20)  | 960(20)  | 1700(20)  | 11(6) |
| H(8B) | 6850(20)  | 320(20)  | 710(20)   | 13(6) |
| H(10) | 9310(30)  | 910(30)  | 3360(30)  | 46(9) |
| H(13) | 3150(30)  | 1150(30) | -1080(30) | 24(7) |
| H(14) | 3250(30)  | 2590(30) | -2540(30) | 23(7) |
| H(15) | 5000(30)  | 3890(30) | -2640(30) | 42(9) |
| H(16) | 6510(30)  | 3780(30) | -1250(20) | 22(7) |
| H(12) | 4680(20)  | 970(30)  | 270(30)   | 20(6) |

Table 6. Torsion angles [°] for etj21.

---

|                      |             |
|----------------------|-------------|
| O(2)-S(1)-N(1)-C(7)  | -117.33(15) |
| O(1)-S(1)-N(1)-C(7)  | 113.04(15)  |
| C(1)-S(1)-N(1)-C(7)  | 0.52(16)    |
| O(2)-S(1)-C(1)-C(6)  | 116.77(15)  |
| O(1)-S(1)-C(1)-C(6)  | -113.34(15) |
| N(1)-S(1)-C(1)-C(6)  | 0.71(16)    |
| O(2)-S(1)-C(1)-C(2)  | -65.2(2)    |
| O(1)-S(1)-C(1)-C(2)  | 64.6(2)     |
| N(1)-S(1)-C(1)-C(2)  | 178.70(19)  |
| C(6)-C(1)-C(2)-C(3)  | -0.8(3)     |
| S(1)-C(1)-C(2)-C(3)  | -178.56(16) |
| C(1)-C(2)-C(3)-C(4)  | 0.3(3)      |
| C(2)-C(3)-C(4)-C(5)  | 0.2(3)      |
| C(3)-C(4)-C(5)-C(6)  | -0.3(3)     |
| C(2)-C(1)-C(6)-C(5)  | 0.8(3)      |
| S(1)-C(1)-C(6)-C(5)  | 178.84(15)  |
| C(2)-C(1)-C(6)-C(7)  | -179.80(18) |
| S(1)-C(1)-C(6)-C(7)  | -1.7(2)     |
| C(4)-C(5)-C(6)-C(1)  | -0.2(3)     |
| C(4)-C(5)-C(6)-C(7)  | -179.56(19) |
| S(1)-N(1)-C(7)-C(6)  | -1.5(2)     |
| S(1)-N(1)-C(7)-C(11) | -120.91(16) |
| S(1)-N(1)-C(7)-C(8)  | 115.92(16)  |
| C(1)-C(6)-C(7)-N(1)  | 2.0(2)      |
| C(5)-C(6)-C(7)-N(1)  | -178.63(19) |
| C(1)-C(6)-C(7)-C(11) | 120.00(19)  |
| C(5)-C(6)-C(7)-C(11) | -60.6(3)    |
| C(1)-C(6)-C(7)-C(8)  | -115.36(19) |

|                         |             |
|-------------------------|-------------|
| C(5)-C(6)-C(7)-C(8)     | 64.0(3)     |
| N(1)-C(7)-C(8)-C(9)     | -59.2(2)    |
| C(6)-C(7)-C(8)-C(9)     | 55.0(2)     |
| C(11)-C(7)-C(8)-C(9)    | 179.28(17)  |
| N(1)-C(7)-C(11)-C(16)   | 74.1(2)     |
| C(6)-C(7)-C(11)-C(16)   | -41.1(2)    |
| C(8)-C(7)-C(11)-C(16)   | -164.25(19) |
| N(1)-C(7)-C(11)-C(12)   | -103.7(2)   |
| C(6)-C(7)-C(11)-C(12)   | 141.10(19)  |
| C(8)-C(7)-C(11)-C(12)   | 17.9(3)     |
| C(16)-C(11)-C(12)-C(13) | 0.6(3)      |
| C(7)-C(11)-C(12)-C(13)  | 178.41(19)  |
| C(11)-C(12)-C(13)-C(14) | 0.4(3)      |
| C(12)-C(13)-C(14)-C(15) | -0.8(3)     |
| C(13)-C(14)-C(15)-C(16) | 0.2(3)      |
| C(14)-C(15)-C(16)-C(11) | 0.8(4)      |
| C(12)-C(11)-C(16)-C(15) | -1.2(3)     |
| C(7)-C(11)-C(16)-C(15)  | -179.1(2)   |

---

Table 7. Hydrogen bonds for erj21 [ $\text{\AA}$  and  $^\circ$ ].

---

| D-H...A | d(D-H) | d(H...A) | d(D...A) | $\angle$ (DHA) |
|---------|--------|----------|----------|----------------|
|---------|--------|----------|----------|----------------|

---

## B. X-ray Data Collection, Structure Solution and Refinement for (R)-3f:

CCDC 1405894

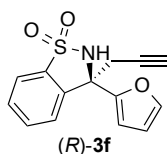

A single crystal was grown from EtOAc with slow diffusion of pentanes at room temperature. A colorless crystal of approximate dimensions 0.202 x 0.333 x 0.426 mm was mounted on a glass fiber and transferred to a Bruker SMART APEX II diffractometer. The APEX2<sup>1</sup> program package was used to determine the unit-cell parameters and for data collection (15 sec/frame scan time for a sphere of diffraction data). The raw frame data was processed using SAINT<sup>2</sup> and SADABS<sup>3</sup> to yield the reflection data file. Subsequent calculations were carried out using the SHELXTL<sup>4</sup> program. The diffraction symmetry was *mmm* and the systematic absences were consistent with the orthorhombic space group  $P2_12_12_1$  that was later determined to be correct.

The structure was solved by direct methods and refined on  $F^2$  by full-matrix least-squares techniques. The analytical scattering factors<sup>5</sup> for neutral atoms were used throughout the analysis. Hydrogen atoms H(1) and H(10) were located from a difference-Fourier map and refined ( $x, y, z$  and  $U_{iso}$ ). The remaining hydrogen atoms were included using a riding model. O(3) and C(12) were disordered and included using partial site-occupancy-factors. The disorder was included to account for the approximate distribution of carbon (50%) and oxygen (50%) over the two sites.

At convergence,  $wR2 = 0.0909$  and  $Goof = 1.070$  for 180 variables refined against 3100 data (0.74 Å),  $R1 = 0.0363$  for those 2870 data with  $I > 2.0\sigma(I)$ . The absolute structure was assigned by refinement of the Flack parameter<sup>6</sup>.

**References.**

1. APEX2 Version 2014.11-0, Bruker AXS, Inc.; Madison, WI 2014.
  2. SAINT Version 8.34a, Bruker AXS, Inc.; Madison, WI 2013.
  3. Sheldrick, G. M. SADABS, Version 2014/5, Bruker AXS, Inc.; Madison, WI 2014.
  4. Sheldrick, G. M. SHELXTL, Version 2014/7, Bruker AXS, Inc.; Madison, WI 2014.
  5. International Tables for Crystallography 1992, Vol. C., Dordrecht: Kluwer Academic Publishers.
  6. Parsons, S., Flack, H. D., Wagner, T. Acta Cryst. B69, 249-259, 2013.
- 

**Definitions:**

$$wR2 = [\Sigma[w(F_o^2 - F_c^2)^2] / \Sigma[w(F_o^2)^2]]^{1/2}$$

$$R1 = \Sigma||F_o| - |F_c|| / \Sigma|F_o|$$

Goof = S =  $[\Sigma[w(F_o^2 - F_c^2)^2] / (n-p)]^{1/2}$  where n is the number of reflections and p is the total number of parameters refined.

The thermal ellipsoid plot is shown at the 30% probability level.

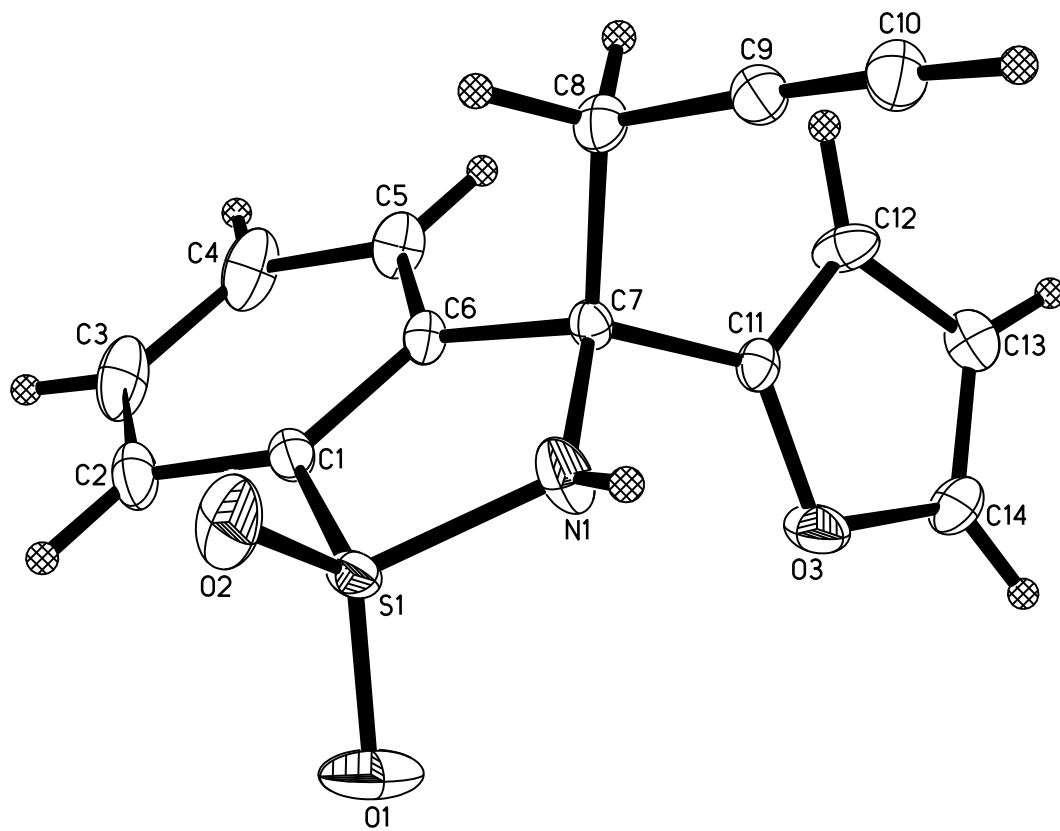



Table 1. Crystal data and structure refinement for erj23.

|                                             |                                                    |          |
|---------------------------------------------|----------------------------------------------------|----------|
| Identification code                         | erj23 (Charlotte Osborne)                          |          |
| Empirical formula                           | C <sub>14</sub> H <sub>11</sub> N O <sub>3</sub> S |          |
| Formula weight                              | 273.30                                             |          |
| Temperature                                 | 133(2) K                                           |          |
| Wavelength                                  | 0.71073 Å                                          |          |
| Crystal system                              | Orthorhombic                                       |          |
| Space group                                 | P2 <sub>1</sub> 2 <sub>1</sub> 2 <sub>1</sub>      |          |
| Unit cell dimensions                        | a = 7.5472(5) Å                                    | a = 90°. |
|                                             | b = 10.3052(7) Å                                   | b = 90°. |
|                                             | c = 16.2327(10) Å                                  | g = 90°. |
| Volume                                      | 1262.51(14) Å <sup>3</sup>                         |          |
| Z                                           | 4                                                  |          |
| Density (calculated)                        | 1.438 Mg/m <sup>3</sup>                            |          |
| Absorption coefficient                      | 0.259 mm <sup>-1</sup>                             |          |
| F(000)                                      | 568                                                |          |
| Crystal color                               | colorless                                          |          |
| Crystal size                                | 0.426 x 0.333 x 0.202 mm <sup>3</sup>              |          |
| Theta range for data collection             | 2.341 to 28.839°                                   |          |
| Index ranges                                | -10 ≤ h ≤ 10, -13 ≤ k ≤ 13, -21 ≤ l ≤ 20           |          |
| Reflections collected                       | 15206                                              |          |
| Independent reflections                     | 3100 [R(int) = 0.0274]                             |          |
| Completeness to theta = 25.500°             | 99.9 %                                             |          |
| Absorption correction                       | Semi-empirical from equivalents                    |          |
| Max. and min. transmission                  | 0.8621 and 0.8165                                  |          |
| Refinement method                           | Full-matrix least-squares on F <sup>2</sup>        |          |
| Data / restraints / parameters              | 3100 / 0 / 180                                     |          |
| Goodness-of-fit on F <sup>2</sup>           | 1.070                                              |          |
| Final R indices [I > 2sigma(I) = 2870 data] | R1 = 0.0363, wR2 = 0.0881                          |          |
| R indices (all data, 0.74Å)                 | R1 = 0.0403, wR2 = 0.0909                          |          |

|                              |                                    |
|------------------------------|------------------------------------|
| Absolute structure parameter | 0.04(2)                            |
| Largest diff. peak and hole  | 0.298 and -0.366 e.Å <sup>-3</sup> |

Table 2. Atomic coordinates ( $\times 10^4$ ) and equivalent isotropic displacement parameters ( $\text{\AA}^2 \times 10^3$ ) for erj23.  $U(\text{eq})$  is defined as one third of the trace of the orthogonalized  $U^{ij}$  tensor.

|       | x       | y       | z       | $U(\text{eq})$ |
|-------|---------|---------|---------|----------------|
| S(1)  | 3053(1) | 7602(1) | 8953(1) | 25(1)          |
| N(1)  | 4347(4) | 6393(2) | 9154(2) | 36(1)          |
| O(1)  | 1714(3) | 7709(3) | 9570(1) | 58(1)          |
| O(2)  | 4026(4) | 8766(2) | 8781(1) | 48(1)          |
| O(3)  | 3159(3) | 3886(2) | 9539(2) | 38(1)          |
| C(1)  | 2206(3) | 6903(2) | 8057(2) | 24(1)          |
| C(2)  | 897(3)  | 7416(3) | 7551(2) | 37(1)          |
| C(3)  | 430(4)  | 6713(3) | 6868(2) | 47(1)          |
| C(4)  | 1240(4) | 5532(3) | 6696(2) | 46(1)          |
| C(5)  | 2551(4) | 5035(3) | 7203(2) | 33(1)          |
| C(6)  | 3040(3) | 5741(2) | 7897(1) | 22(1)          |
| C(7)  | 4499(3) | 5402(2) | 8508(1) | 20(1)          |
| C(8)  | 6309(3) | 5461(3) | 8061(2) | 28(1)          |
| C(9)  | 7799(3) | 5308(2) | 8617(2) | 28(1)          |
| C(10) | 8994(4) | 5223(3) | 9089(2) | 34(1)          |
| C(11) | 4214(3) | 4100(2) | 8891(2) | 22(1)          |
| C(12) | 4765(3) | 2981(2) | 8580(1) | 32(1)          |
| C(13) | 4119(3) | 1987(3) | 9100(2) | 31(1)          |
| C(14) | 3160(4) | 2544(3) | 9680(2) | 33(1)          |

Table 3. Bond lengths [Å] and angles [°] for erj23.

---

|                |            |
|----------------|------------|
| S(1)-O(1)      | 1.426(2)   |
| S(1)-O(2)      | 1.435(2)   |
| S(1)-N(1)      | 1.616(2)   |
| S(1)-C(1)      | 1.745(3)   |
| N(1)-C(7)      | 1.468(3)   |
| O(3)-C(11)     | 1.338(3)   |
| O(3)-C(14)     | 1.402(4)   |
| C(1)-C(6)      | 1.378(3)   |
| C(1)-C(2)      | 1.389(4)   |
| C(2)-C(3)      | 1.371(5)   |
| C(3)-C(4)      | 1.390(5)   |
| C(4)-C(5)      | 1.385(4)   |
| C(5)-C(6)      | 1.391(4)   |
| C(6)-C(7)      | 1.522(3)   |
| C(7)-C(11)     | 1.494(3)   |
| C(7)-C(8)      | 1.548(3)   |
| C(8)-C(9)      | 1.451(4)   |
| C(9)-C(10)     | 1.186(4)   |
| C(11)-C(12)    | 1.326(3)   |
| C(12)-C(13)    | 1.414(3)   |
| C(13)-C(14)    | 1.319(4)   |
| O(1)-S(1)-O(2) | 115.75(16) |
| O(1)-S(1)-N(1) | 110.28(16) |
| O(2)-S(1)-N(1) | 112.00(15) |
| O(1)-S(1)-C(1) | 110.97(13) |
| O(2)-S(1)-C(1) | 111.74(12) |
| N(1)-S(1)-C(1) | 94.07(12)  |

|                   |            |
|-------------------|------------|
| C(7)-N(1)-S(1)    | 116.09(18) |
| C(11)-O(3)-C(14)  | 106.9(2)   |
| C(6)-C(1)-C(2)    | 123.0(3)   |
| C(6)-C(1)-S(1)    | 110.40(18) |
| C(2)-C(1)-S(1)    | 126.6(2)   |
| C(3)-C(2)-C(1)    | 117.4(3)   |
| C(2)-C(3)-C(4)    | 120.8(3)   |
| C(5)-C(4)-C(3)    | 121.3(3)   |
| C(4)-C(5)-C(6)    | 118.5(3)   |
| C(1)-C(6)-C(5)    | 119.1(2)   |
| C(1)-C(6)-C(7)    | 114.0(2)   |
| C(5)-C(6)-C(7)    | 126.8(2)   |
| N(1)-C(7)-C(11)   | 108.4(2)   |
| N(1)-C(7)-C(6)    | 104.41(19) |
| C(11)-C(7)-C(6)   | 111.9(2)   |
| N(1)-C(7)-C(8)    | 112.1(2)   |
| C(11)-C(7)-C(8)   | 111.0(2)   |
| C(6)-C(7)-C(8)    | 108.93(19) |
| C(9)-C(8)-C(7)    | 112.8(2)   |
| C(10)-C(9)-C(8)   | 177.4(3)   |
| C(12)-C(11)-O(3)  | 110.0(2)   |
| C(12)-C(11)-C(7)  | 125.2(2)   |
| O(3)-C(11)-C(7)   | 124.2(2)   |
| C(11)-C(12)-C(13) | 107.2(2)   |
| C(14)-C(13)-C(12) | 107.5(2)   |
| C(13)-C(14)-O(3)  | 108.3(2)   |

---

Table 4. Anisotropic displacement parameters ( $\text{\AA}^2 \times 10^3$ ) for erj23. The anisotropic displacement factor exponent takes the form:  $-2p^2[ h^2 a^{*2}U^{11} + \dots + 2 h k a^* b^* U^{12} ]$

|       | U <sup>11</sup> | U <sup>22</sup> | U <sup>33</sup> | U <sup>23</sup> | U <sup>13</sup> | U <sup>12</sup> |
|-------|-----------------|-----------------|-----------------|-----------------|-----------------|-----------------|
| S(1)  | 26(1)           | 19(1)           | 30(1)           | -2(1)           | 8(1)            | 2(1)            |
| N(1)  | 44(1)           | 26(1)           | 38(1)           | -13(1)          | -19(1)          | 10(1)           |
| O(1)  | 38(1)           | 91(2)           | 45(1)           | -20(1)          | 19(1)           | 1(1)            |
| O(2)  | 74(2)           | 19(1)           | 50(1)           | 4(1)            | -6(1)           | -12(1)          |
| O(3)  | 38(1)           | 28(1)           | 48(1)           | 4(1)            | 21(1)           | 3(1)            |
| C(1)  | 19(1)           | 22(1)           | 32(1)           | 6(1)            | 2(1)            | 0(1)            |
| C(2)  | 24(1)           | 35(2)           | 53(2)           | 18(1)           | -2(1)           | 5(1)            |
| C(3)  | 36(2)           | 52(2)           | 53(2)           | 23(2)           | -24(2)          | -9(1)           |
| C(4)  | 50(2)           | 48(2)           | 39(2)           | 10(1)           | -26(2)          | -16(2)          |
| C(5)  | 38(2)           | 30(1)           | 32(1)           | 2(1)            | -11(1)          | -7(1)           |
| C(6)  | 21(1)           | 21(1)           | 25(1)           | 5(1)            | -4(1)           | -2(1)           |
| C(7)  | 23(1)           | 18(1)           | 20(1)           | -2(1)           | -3(1)           | 2(1)            |
| C(8)  | 24(1)           | 28(1)           | 31(1)           | 6(1)            | 0(1)            | -4(1)           |
| C(9)  | 25(1)           | 25(1)           | 35(1)           | 5(1)            | 3(1)            | -2(1)           |
| C(10) | 24(1)           | 38(2)           | 40(2)           | 10(1)           | -2(1)           | -4(1)           |
| C(11) | 18(1)           | 25(1)           | 23(1)           | 4(1)            | -5(1)           | -2(1)           |
| C(12) | 44(1)           | 25(1)           | 27(1)           | -6(1)           | 12(1)           | -10(1)          |
| C(13) | 29(1)           | 22(1)           | 43(2)           | -1(1)           | -4(1)           | -5(1)           |
| C(14) | 36(1)           | 33(1)           | 31(1)           | 9(1)            | 4(1)            | -9(1)           |

Table 5. Hydrogen coordinates ( $\times 10^4$ ) and isotropic displacement parameters ( $\text{\AA}^2 \times 10^{-3}$ ) for erj23.

|        | x        | y        | z        | U(eq)  |
|--------|----------|----------|----------|--------|
| H(1)   | 5160(50) | 6570(30) | 9490(20) | 44(10) |
| H(2B)  | 346      | 8222     | 7674     | 45     |
| H(3A)  | -457     | 7037     | 6507     | 57     |
| H(4A)  | 887      | 5056     | 6223     | 55     |
| H(5A)  | 3105     | 4230     | 7079     | 40     |
| H(8A)  | 6353     | 4769     | 7639     | 33     |
| H(8B)  | 6414     | 6306     | 7774     | 33     |
| H(10)  | 9950(60) | 5160(40) | 9500(30) | 69(13) |
| H(12A) | 5464     | 2869     | 8098     | 38     |
| H(13A) | 4336     | 1084     | 9042     | 38     |
| H(14A) | 2571     | 2110     | 10117    | 40     |

Table 6. Hydrogen bonds for erj23 [ $\text{\AA}$  and  $^\circ$ ].

| D-H...A            | d(D-H)  | d(H...A) | d(D...A) | $\angle(\text{DHA})$ |
|--------------------|---------|----------|----------|----------------------|
| N(1)-H(1)...O(1)#1 | 0.84(4) | 2.06(4)  | 2.888(3) | 167(3)               |

Symmetry transformations used to generate equivalent atoms:

#1  $x+1/2, -y+3/2, -z+2$



### C. X-ray Data Collection, Structure Solution and Refinement for (R)-3h:

CCDC 1405895

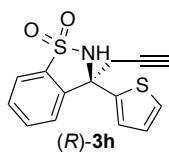

A single crystal was grown from EtOAc with slow diffusion of pentanes at room temperature. A colorless crystal of approximate dimensions 0.573 x 0.369 x 0.266 mm was mounted on a glass fiber and transferred to a Bruker SMART APEX II diffractometer. The APEX2<sup>1</sup> program package was used to determine the unit-cell parameters and for data collection (5 sec/frame scan time for a sphere of diffraction data). The raw frame data was processed using SAINT<sup>2</sup> and SADABS<sup>3</sup> to yield the reflection data file. Subsequent calculations were carried out using the SHELXTL<sup>4</sup> program. The diffraction symmetry was *mmm* and the systematic absences were consistent with the orthorhombic space group  $P2_12_12_1$  that was later determined to be correct.

The structure was solved by direct methods and refined on  $F^2$  by full-matrix least-squares techniques. The analytical scattering factors<sup>5</sup> for neutral atoms were used throughout the analysis. S(2) and C(12) were disordered and included using partial site-occupancy-factors. The disorder was included to account for the approximate distribution of carbon (25%) / sulfur (75%) at the position of S(2) and carbon (75%) / sulfur (25%) at the position of C(12). H(1) and H(10) were located from a difference-Fourier map and refined ( $x, y, z$  and  $U_{iso}$ ). All other hydrogen atoms were included using a riding model.

At convergence,  $wR2 = 0.0762$  and  $Goof = 1.076$  for 180 variables refined against 3338 data (0.73 Å),  $R1 = 0.0275$  for those 3263 data with  $I > 2.0\sigma(I)$ . The absolute structure was assigned by refinement of the Flack parameter<sup>6</sup>.

**References.**

1. APEX2 Version 2014.11-0, Bruker AXS, Inc.; Madison, WI 2014.
  2. SAINT Version 8.34a, Bruker AXS, Inc.; Madison, WI 2013.
  3. Sheldrick, G. M. SADABS, Version 2014/5, Bruker AXS, Inc.; Madison, WI 2014.
  4. Sheldrick, G. M. SHELXTL, Version 2014/7, Bruker AXS, Inc.; Madison, WI 2014.
  5. International Tables for Crystallography 1992, Vol. C., Dordrecht: Kluwer Academic Publishers.
  6. Parsons, S., Flack, H. D., Wagner, T. Acta Cryst. B69, 249-259, 2013.
- 

**Definitions:**

$$wR2 = [\Sigma[w(F_o^2 - F_c^2)^2] / \Sigma[w(F_o^2)^2]]^{1/2}$$

$$R1 = \Sigma||F_o| - |F_c|| / \Sigma|F_o|$$

Goof = S =  $[\Sigma[w(F_o^2 - F_c^2)^2] / (n-p)]^{1/2}$  where n is the number of reflections and p is the total number of parameters refined.

The thermal ellipsoid plot is shown at the 50% probability level.

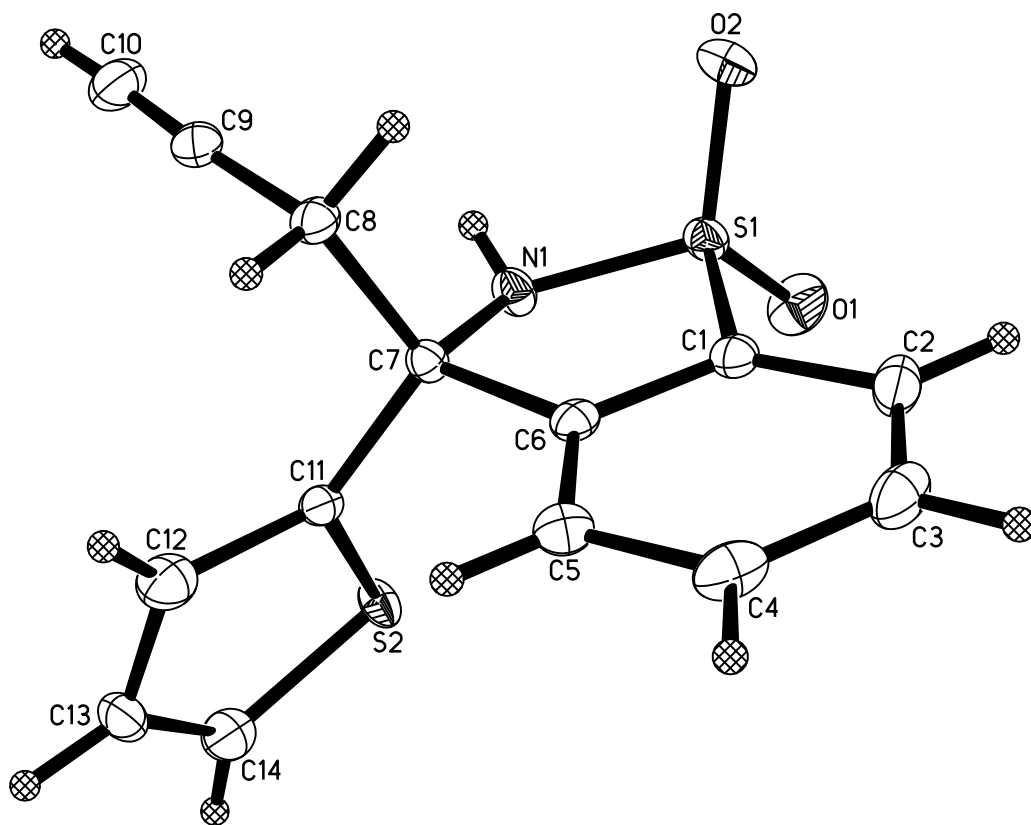

Table 1. Crystal data and structure refinement for erj24.

|                                             |                                                                 |          |
|---------------------------------------------|-----------------------------------------------------------------|----------|
| Identification code                         | erj24 (Charlotte Osborne)                                       |          |
| Empirical formula                           | C <sub>14</sub> H <sub>11</sub> N O <sub>2</sub> S <sub>2</sub> |          |
| Formula weight                              | 289.36                                                          |          |
| Temperature                                 | 88(2) K                                                         |          |
| Wavelength                                  | 0.71073 Å                                                       |          |
| Crystal system                              | Orthorhombic                                                    |          |
| Space group                                 | P2 <sub>1</sub> 2 <sub>1</sub> 2 <sub>1</sub>                   |          |
| Unit cell dimensions                        | a = 7.5169(3) Å                                                 | a = 90°. |
|                                             | b = 10.5263(5) Å                                                | b = 90°. |
|                                             | c = 16.5993(8) Å                                                | g = 90°. |
| Volume                                      | 1313.42(10) Å <sup>3</sup>                                      |          |
| Z                                           | 4                                                               |          |
| Density (calculated)                        | 1.463 Mg/m <sup>3</sup>                                         |          |
| Absorption coefficient                      | 0.401 mm <sup>-1</sup>                                          |          |
| F(000)                                      | 600                                                             |          |
| Crystal color                               | colorless                                                       |          |
| Crystal size                                | 0.573 x 0.369 x 0.266 mm <sup>3</sup>                           |          |
| Theta range for data collection             | 2.291 to 29.140°                                                |          |
| Index ranges                                | -9 ≤ h ≤ 10, -14 ≤ k ≤ 14, -22 ≤ l ≤ 22                         |          |
| Reflections collected                       | 16368                                                           |          |
| Independent reflections                     | 3338 [R(int) = 0.0221]                                          |          |
| Completeness to theta = 25.500°             | 99.9 %                                                          |          |
| Absorption correction                       | Numerical                                                       |          |
| Max. and min. transmission                  | 0.9277 and 0.8316                                               |          |
| Refinement method                           | Full-matrix least-squares on F <sup>2</sup>                     |          |
| Data / restraints / parameters              | 3338 / 0 / 180                                                  |          |
| Goodness-of-fit on F <sup>2</sup>           | 1.076                                                           |          |
| Final R indices [I > 2sigma(I) = 3263 data] | R1 = 0.0275, wR2 = 0.0754                                       |          |
| R indices (all data, 0.73 Å)                | R1 = 0.0283, wR2 = 0.0762                                       |          |

|                              |                                    |
|------------------------------|------------------------------------|
| Absolute structure parameter | 0.040(17)                          |
| Largest diff. peak and hole  | 0.529 and -0.343 e.Å <sup>-3</sup> |

Table 2. Atomic coordinates ( $\times 10^4$ ) and equivalent isotropic displacement parameters ( $\text{\AA}^2 \times 10^3$ ) for erj24.  $U(\text{eq})$  is defined as one third of the trace of the orthogonalized  $U^{ij}$  tensor.

|       | x       | y       | z       | $U(\text{eq})$ |
|-------|---------|---------|---------|----------------|
| S(1)  | 3023(1) | 2396(1) | 1085(1) | 14(1)          |
| S(2)  | 2903(1) | 6156(1) | 301(1)  | 14(1)          |
| O(1)  | 1668(2) | 2128(2) | 496(1)  | 25(1)          |
| O(2)  | 4157(2) | 1338(1) | 1302(1) | 23(1)          |
| N(1)  | 4166(2) | 3658(2) | 827(1)  | 15(1)          |
| C(1)  | 2139(3) | 3119(2) | 1943(1) | 14(1)          |
| C(2)  | 841(3)  | 2609(2) | 2448(1) | 20(1)          |
| C(3)  | 343(3)  | 3334(2) | 3112(1) | 23(1)          |
| C(4)  | 1123(3) | 4508(2) | 3257(1) | 21(1)          |
| C(5)  | 2439(3) | 4994(2) | 2750(1) | 17(1)          |
| C(6)  | 2945(3) | 4280(2) | 2079(1) | 13(1)          |
| C(7)  | 4410(3) | 4602(2) | 1480(1) | 12(1)          |
| C(8)  | 6241(3) | 4446(2) | 1908(1) | 15(1)          |
| C(9)  | 7722(3) | 4540(2) | 1342(1) | 18(1)          |
| C(10) | 8858(3) | 4545(2) | 845(2)  | 24(1)          |
| C(11) | 4195(2) | 5919(2) | 1128(1) | 12(1)          |
| C(12) | 4882(2) | 7120(2) | 1456(1) | 23(1)          |
| C(13) | 4238(3) | 8128(2) | 940(1)  | 21(1)          |
| C(14) | 3182(3) | 7740(2) | 320(1)  | 22(1)          |

Table 3. Bond lengths [Å] and angles [°] for etj24.

---

|                |            |
|----------------|------------|
| S(1)-O(1)      | 1.4387(15) |
| S(1)-O(2)      | 1.4478(16) |
| S(1)-N(1)      | 1.6393(18) |
| S(1)-C(1)      | 1.747(2)   |
| S(2)-C(14)     | 1.682(2)   |
| S(2)-C(11)     | 1.6990(19) |
| N(1)-C(7)      | 1.482(2)   |
| C(1)-C(6)      | 1.382(3)   |
| C(1)-C(2)      | 1.394(3)   |
| C(2)-C(3)      | 1.392(3)   |
| C(3)-C(4)      | 1.389(3)   |
| C(4)-C(5)      | 1.396(3)   |
| C(5)-C(6)      | 1.396(3)   |
| C(6)-C(7)      | 1.522(3)   |
| C(7)-C(11)     | 1.513(3)   |
| C(7)-C(8)      | 1.557(3)   |
| C(8)-C(9)      | 1.460(3)   |
| C(9)-C(10)     | 1.187(3)   |
| C(11)-C(12)    | 1.470(2)   |
| C(12)-C(13)    | 1.447(3)   |
| C(13)-C(14)    | 1.363(3)   |
| O(1)-S(1)-O(2) | 115.80(10) |
| O(1)-S(1)-N(1) | 110.63(10) |
| O(2)-S(1)-N(1) | 112.31(10) |
| O(1)-S(1)-C(1) | 111.70(10) |
| O(2)-S(1)-C(1) | 110.87(9)  |
| N(1)-S(1)-C(1) | 93.38(9)   |

|                   |            |
|-------------------|------------|
| C(14)-S(2)-C(11)  | 93.42(10)  |
| C(7)-N(1)-S(1)    | 114.66(13) |
| C(6)-C(1)-C(2)    | 123.30(19) |
| C(6)-C(1)-S(1)    | 110.61(14) |
| C(2)-C(1)-S(1)    | 126.07(16) |
| C(3)-C(2)-C(1)    | 117.0(2)   |
| C(4)-C(3)-C(2)    | 120.8(2)   |
| C(3)-C(4)-C(5)    | 121.4(2)   |
| C(6)-C(5)-C(4)    | 118.5(2)   |
| C(1)-C(6)-C(5)    | 119.15(18) |
| C(1)-C(6)-C(7)    | 114.06(16) |
| C(5)-C(6)-C(7)    | 126.69(18) |
| N(1)-C(7)-C(11)   | 108.54(15) |
| N(1)-C(7)-C(6)    | 103.80(15) |
| C(11)-C(7)-C(6)   | 112.32(15) |
| N(1)-C(7)-C(8)    | 111.86(16) |
| C(11)-C(7)-C(8)   | 111.52(16) |
| C(6)-C(7)-C(8)    | 108.58(15) |
| C(9)-C(8)-C(7)    | 111.95(16) |
| C(10)-C(9)-C(8)   | 174.7(2)   |
| C(12)-C(11)-C(7)  | 127.37(16) |
| C(12)-C(11)-S(2)  | 111.95(13) |
| C(7)-C(11)-S(2)   | 120.48(14) |
| C(13)-C(12)-C(11) | 107.10(15) |
| C(14)-C(13)-C(12) | 114.98(18) |
| C(13)-C(14)-S(2)  | 112.53(16) |

---



Table 4. Anisotropic displacement parameters ( $\text{\AA}^2 \times 10^3$ ) for erj24. The anisotropic displacement factor exponent takes the form:  $-2p^2[ h^2 a^{*2}U^{11} + \dots + 2 h k a^* b^* U^{12} ]$

|       | U <sup>11</sup> | U <sup>22</sup> | U <sup>33</sup> | U <sup>23</sup> | U <sup>13</sup> | U <sup>12</sup> |
|-------|-----------------|-----------------|-----------------|-----------------|-----------------|-----------------|
| S(1)  | 15(1)           | 12(1)           | 16(1)           | -1(1)           | -2(1)           | 0(1)            |
| S(2)  | 20(1)           | 11(1)           | 12(1)           | 3(1)            | -5(1)           | -2(1)           |
| O(1)  | 21(1)           | 31(1)           | 24(1)           | -9(1)           | -7(1)           | -2(1)           |
| O(2)  | 25(1)           | 14(1)           | 31(1)           | 2(1)            | 0(1)            | 4(1)            |
| N(1)  | 18(1)           | 12(1)           | 14(1)           | -2(1)           | 3(1)            | -1(1)           |
| C(1)  | 13(1)           | 15(1)           | 15(1)           | 2(1)            | -1(1)           | 2(1)            |
| C(2)  | 15(1)           | 23(1)           | 23(1)           | 7(1)            | -1(1)           | -4(1)           |
| C(3)  | 17(1)           | 32(1)           | 21(1)           | 11(1)           | 4(1)            | 1(1)            |
| C(4)  | 20(1)           | 30(1)           | 13(1)           | 3(1)            | 3(1)            | 7(1)            |
| C(5)  | 17(1)           | 19(1)           | 14(1)           | 0(1)            | 0(1)            | 3(1)            |
| C(6)  | 11(1)           | 15(1)           | 12(1)           | 3(1)            | -2(1)           | 2(1)            |
| C(7)  | 13(1)           | 11(1)           | 12(1)           | -1(1)           | 1(1)            | 0(1)            |
| C(8)  | 13(1)           | 16(1)           | 16(1)           | 3(1)            | -1(1)           | 1(1)            |
| C(9)  | 15(1)           | 17(1)           | 22(1)           | 5(1)            | -5(1)           | 1(1)            |
| C(10) | 15(1)           | 27(1)           | 29(1)           | 7(1)            | 2(1)            | 2(1)            |
| C(11) | 11(1)           | 13(1)           | 13(1)           | 2(1)            | 1(1)            | 1(1)            |
| C(12) | 21(1)           | 24(1)           | 24(1)           | 7(1)            | 1(1)            | 2(1)            |
| C(13) | 22(1)           | 13(1)           | 28(1)           | -2(1)           | 8(1)            | -1(1)           |
| C(14) | 20(1)           | 22(1)           | 22(1)           | 10(1)           | 3(1)            | 2(1)            |

Table 5. Hydrogen coordinates ( $\times 10^4$ ) and isotropic displacement parameters ( $\text{\AA}^2 \times 10^{-3}$ ) for erj24.

|        | x        | y        | z       | U(eq)  |
|--------|----------|----------|---------|--------|
| H(1)   | 4980(40) | 3440(30) | 590(20) | 34(9)  |
| H(2B)  | 321      | 1803     | 2344    | 24     |
| H(3A)  | -542     | 3022     | 3470    | 28     |
| H(4A)  | 754      | 4991     | 3711    | 25     |
| H(5A)  | 2977     | 5793     | 2858    | 20     |
| H(8A)  | 6368     | 5112     | 2325    | 18     |
| H(8B)  | 6283     | 3610     | 2180    | 18     |
| H(10)  | 9730(50) | 4590(40) | 510(20) | 55(11) |
| H(12A) | 5610     | 7216     | 1920    | 27     |
| H(13A) | 4530     | 8995     | 1027    | 25     |
| H(14A) | 2661     | 8303     | -61     | 26     |

Table 6. Hydrogen bonds for erj24 [ $\text{\AA}$  and  $^\circ$ ].

| D-H...A               | d(D-H)  | d(H...A) | d(D...A) | <(DHA) |
|-----------------------|---------|----------|----------|--------|
| N(1)-H(1)...O(1)#1    | 0.76(3) | 2.28(3)  | 3.008(2) | 159(3) |
| C(8)-H(8A)...O(2)#2   | 0.99    | 2.65     | 3.590(3) | 158.9  |
| C(13)-H(13A)...O(2)#3 | 0.95    | 2.52     | 3.432(3) | 160.2  |

Symmetry transformations used to generate equivalent atoms:

#1  $x+1/2, -y+1/2, -z$  #2  $-x+1, y+1/2, -z+1/2$  #3  $x, y+1, z$

#### **D. X-ray Data Collection, Structure Solution and Refinement for (R)-5b:**

CCDC 1410049

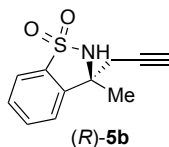

A single crystal was grown from Et<sub>2</sub>O with slow diffusion of pentanes at room temperature. A colorless crystal of approximate dimensions 0.284 x 0.299 x 0.489 mm was mounted on a glass fiber and transferred to a Bruker SMART APEX II diffractometer. The APEX2<sup>1</sup> program package was used to determine the unit-cell parameters and for data collection (10 sec/frame scan time for a sphere of diffraction data). The raw frame data was processed using SAINT<sup>2</sup> and SADABS<sup>3</sup> to yield the reflection data file. Subsequent calculations were carried out using the SHELXTL<sup>4</sup> program. The diffraction symmetry was *mmm* and the systematic absences were consistent with the orthorhombic space group *P*2<sub>1</sub>2<sub>1</sub>2<sub>1</sub> that was later determined to be correct.

The structure was solved by direct methods and refined on F<sup>2</sup> by full-matrix least-squares techniques. The analytical scattering factors<sup>5</sup> for neutral atoms were used throughout the analysis. Hydrogen atoms were located from a difference-Fourier map and refined (x,y,z and U<sub>iso</sub>).

At convergence, wR2 = 0.0679 and Goof = 1.058 for 180 variables refined against 2571 data (0.74Å), R1 = 0.0259 for those 2521 data with I > 2.0σ(I). The absolute structure was assigned by refinement of the Flack parameter<sup>6</sup>.

**References.**

1. APEX2 Version 2014.11-0, Bruker AXS, Inc.; Madison, WI 2014.
  2. SAINT Version 8.34a, Bruker AXS, Inc.; Madison, WI 2013.
  3. Sheldrick, G. M. SADABS, Version 2014/5, Bruker AXS, Inc.; Madison, WI 2014.
  4. Sheldrick, G. M. SHELXTL, Version 2014/7, Bruker AXS, Inc.; Madison, WI 2014.
  5. International Tables for Crystallography 1992, Vol. C., Dordrecht: Kluwer Academic Publishers.
  6. Parsons, S., Flack, H. D., Wagner, T. Acta Cryst. B69, 249-259, 2013.
- 

**Definitions:**

$$wR2 = [\Sigma[w(F_o^2 - F_c^2)^2] / \Sigma[w(F_o^2)^2]]^{1/2}$$

$$R1 = \Sigma||F_o| - |F_c|| / \Sigma|F_o|$$

Goof = S =  $[\Sigma[w(F_o^2 - F_c^2)^2] / (n-p)]^{1/2}$  where n is the number of reflections and p is the total number of parameters refined.

The thermal ellipsoid plot is shown at the 50% probability level.

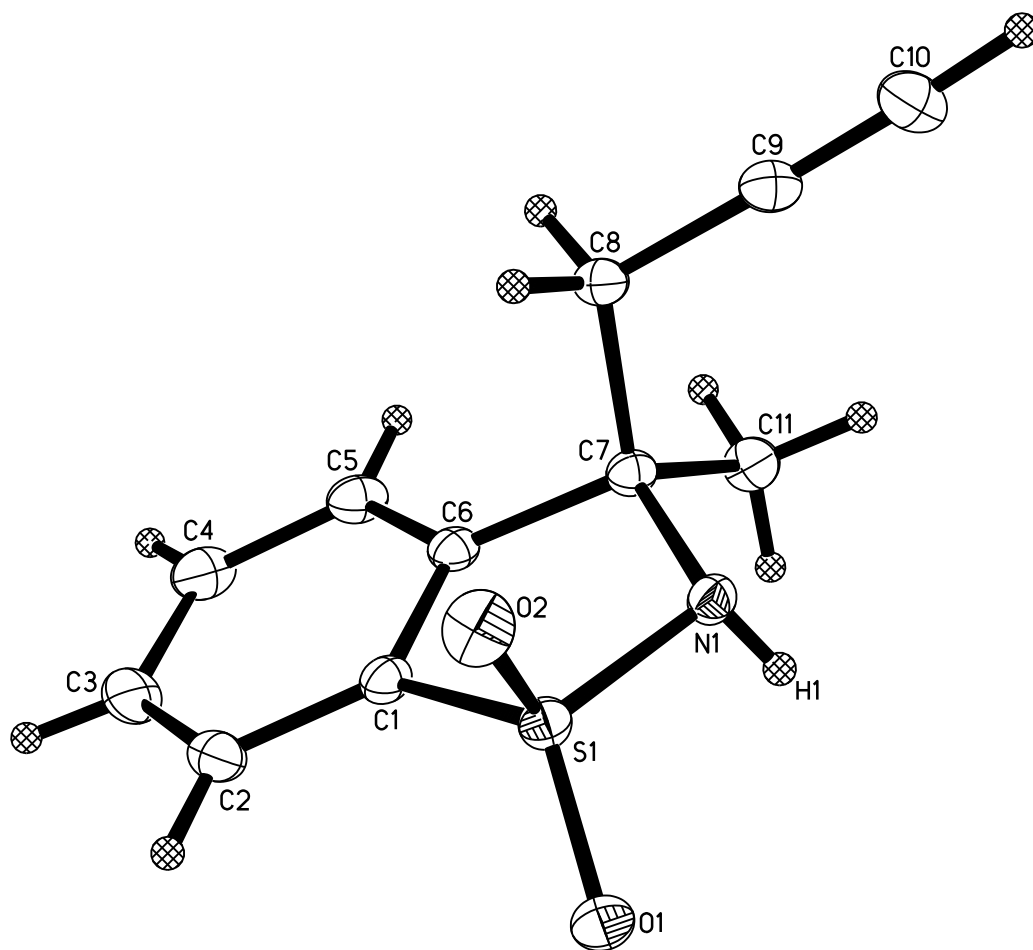

Table 1. Crystal data and structure refinement for erj26.

|                                         |                                                    |          |
|-----------------------------------------|----------------------------------------------------|----------|
| Identification code                     | erj26 (Charlotte Osborne)                          |          |
| Empirical formula                       | C <sub>11</sub> H <sub>11</sub> N O <sub>2</sub> S |          |
| Formula weight                          | 221.27                                             |          |
| Temperature                             | 133(2) K                                           |          |
| Wavelength                              | 0.71073 Å                                          |          |
| Crystal system                          | Orthorhombic                                       |          |
| Space group                             | P2 <sub>1</sub> 2 <sub>1</sub> 2 <sub>1</sub>      |          |
| Unit cell dimensions                    | a = 8.0916(6) Å                                    | a = 90°. |
|                                         | b = 9.4218(7) Å                                    | b = 90°. |
|                                         | c = 13.8016(10) Å                                  | g = 90°. |
| Volume                                  | 1052.20(13) Å <sup>3</sup>                         |          |
| Z                                       | 4                                                  |          |
| Density (calculated)                    | 1.397 Mg/m <sup>3</sup>                            |          |
| Absorption coefficient                  | 0.285 mm <sup>-1</sup>                             |          |
| F(000)                                  | 464                                                |          |
| Crystal color                           | colorless                                          |          |
| Crystal size                            | 0.489 x 0.299 x 0.284 mm <sup>3</sup>              |          |
| Theta range for data collection         | 2.617 to 28.724°                                   |          |
| Index ranges                            | -10 ≤ h ≤ 10, -12 ≤ k ≤ 12, -18 ≤ l ≤ 18           |          |
| Reflections collected                   | 12648                                              |          |
| Independent reflections                 | 2571 [R(int) = 0.0277]                             |          |
| Completeness to theta = 25.500°         | 99.9 %                                             |          |
| Absorption correction                   | Numerical                                          |          |
| Max. and min. transmission              | 1.0000 and 0.8521                                  |          |
| Refinement method                       | Full-matrix least-squares on F <sup>2</sup>        |          |
| Data / restraints / parameters          | 2571 / 0 / 180                                     |          |
| Goodness-of-fit on F <sup>2</sup>       | 1.058                                              |          |
| Final R indices [I > 2σ(I) = 2521 data] | R1 = 0.0259, wR2 = 0.0672                          |          |

R indices (all data, 0.74Å)

R1 = 0.0265, wR2 = 0.0679

Absolute structure parameter

0.01(3)

Largest diff. peak and hole

0.314 and -0.279 e.Å<sup>-3</sup>



Table 2. Atomic coordinates ( $\times 10^4$ ) and equivalent isotropic displacement parameters ( $\text{\AA}^2 \times 10^3$ )

for erj26.  $U(\text{eq})$  is defined as one third of the trace of the orthogonalized  $U^{ij}$  tensor.

|       | x        | y       | z       | $U(\text{eq})$ |
|-------|----------|---------|---------|----------------|
| S(1)  | 995(1)   | 3781(1) | 7431(1) | 14(1)          |
| O(1)  | 639(2)   | 4308(2) | 8386(1) | 21(1)          |
| O(2)  | 360(2)   | 2389(1) | 7201(1) | 22(1)          |
| N(1)  | 370(2)   | 4924(2) | 6611(1) | 14(1)          |
| C(1)  | 3091(2)  | 3848(2) | 7115(1) | 15(1)          |
| C(2)  | 4403(2)  | 3209(2) | 7592(1) | 22(1)          |
| C(3)  | 5950(3)  | 3368(2) | 7180(1) | 26(1)          |
| C(4)  | 6157(2)  | 4107(2) | 6320(1) | 24(1)          |
| C(5)  | 4813(2)  | 4700(2) | 5835(1) | 19(1)          |
| C(6)  | 3250(2)  | 4566(2) | 6245(1) | 14(1)          |
| C(7)  | 1612(2)  | 5056(2) | 5812(1) | 14(1)          |
| C(8)  | 1157(2)  | 4018(2) | 4982(1) | 17(1)          |
| C(9)  | -448(2)  | 4300(2) | 4531(1) | 18(1)          |
| C(10) | -1745(2) | 4511(2) | 4149(1) | 23(1)          |
| C(11) | 1642(3)  | 6587(2) | 5455(1) | 19(1)          |

Table 3. Bond lengths [Å] and angles [°] for etj26.

---

|              |            |
|--------------|------------|
| S(1)-O(1)    | 1.4377(13) |
| S(1)-O(2)    | 1.4438(14) |
| S(1)-N(1)    | 1.6418(16) |
| S(1)-C(1)    | 1.7524(17) |
| N(1)-C(7)    | 1.497(2)   |
| N(1)-H(1)    | 0.77(3)    |
| C(1)-C(6)    | 1.384(2)   |
| C(1)-C(2)    | 1.388(3)   |
| C(2)-C(3)    | 1.384(3)   |
| C(2)-H(2)    | 0.93(3)    |
| C(3)-C(4)    | 1.386(3)   |
| C(3)-H(3)    | 0.91(3)    |
| C(4)-C(5)    | 1.394(3)   |
| C(4)-H(4)    | 0.95(3)    |
| C(5)-C(6)    | 1.392(2)   |
| C(5)-H(5)    | 0.94(3)    |
| C(6)-C(7)    | 1.525(2)   |
| C(7)-C(11)   | 1.525(2)   |
| C(7)-C(8)    | 1.550(2)   |
| C(8)-C(9)    | 1.464(3)   |
| C(8)-H(8A)   | 1.01(2)    |
| C(8)-H(8B)   | 0.95(2)    |
| C(9)-C(10)   | 1.192(3)   |
| C(10)-H(10)  | 0.92(3)    |
| C(11)-H(11A) | 0.98(3)    |
| C(11)-H(11B) | 0.93(3)    |
| C(11)-H(11C) | 0.97(3)    |

|                 |            |
|-----------------|------------|
| O(1)-S(1)-O(2)  | 116.34(8)  |
| O(1)-S(1)-N(1)  | 110.12(8)  |
| O(2)-S(1)-N(1)  | 109.58(8)  |
| O(1)-S(1)-C(1)  | 114.17(8)  |
| O(2)-S(1)-C(1)  | 108.82(9)  |
| N(1)-S(1)-C(1)  | 95.88(8)   |
| C(7)-N(1)-S(1)  | 110.82(12) |
| C(7)-N(1)-H(1)  | 113.8(19)  |
| S(1)-N(1)-H(1)  | 107.4(18)  |
| C(6)-C(1)-C(2)  | 123.60(16) |
| C(6)-C(1)-S(1)  | 108.88(13) |
| C(2)-C(1)-S(1)  | 127.35(14) |
| C(3)-C(2)-C(1)  | 116.72(17) |
| C(3)-C(2)-H(2)  | 120.5(15)  |
| C(1)-C(2)-H(2)  | 122.6(15)  |
| C(2)-C(3)-C(4)  | 121.09(18) |
| C(2)-C(3)-H(3)  | 121.4(17)  |
| C(4)-C(3)-H(3)  | 117.5(17)  |
| C(3)-C(4)-C(5)  | 121.24(18) |
| C(3)-C(4)-H(4)  | 120.9(17)  |
| C(5)-C(4)-H(4)  | 117.9(17)  |
| C(6)-C(5)-C(4)  | 118.52(17) |
| C(6)-C(5)-H(5)  | 121.0(16)  |
| C(4)-C(5)-H(5)  | 120.5(16)  |
| C(1)-C(6)-C(5)  | 118.79(16) |
| C(1)-C(6)-C(7)  | 114.00(15) |
| C(5)-C(6)-C(7)  | 127.10(15) |
| N(1)-C(7)-C(11) | 109.09(14) |
| N(1)-C(7)-C(6)  | 105.65(13) |
| C(11)-C(7)-C(6) | 113.48(15) |

|                     |            |
|---------------------|------------|
| N(1)-C(7)-C(8)      | 109.46(14) |
| C(11)-C(7)-C(8)     | 111.19(14) |
| C(6)-C(7)-C(8)      | 107.79(14) |
| C(9)-C(8)-C(7)      | 114.22(15) |
| C(9)-C(8)-H(8A)     | 109.7(14)  |
| C(7)-C(8)-H(8A)     | 108.6(14)  |
| C(9)-C(8)-H(8B)     | 109.7(15)  |
| C(7)-C(8)-H(8B)     | 109.1(14)  |
| H(8A)-C(8)-H(8B)    | 105.1(19)  |
| C(10)-C(9)-C(8)     | 178.6(2)   |
| C(9)-C(10)-H(10)    | 177.4(18)  |
| C(7)-C(11)-H(11A)   | 109.3(16)  |
| C(7)-C(11)-H(11B)   | 114.0(15)  |
| H(11A)-C(11)-H(11B) | 109(2)     |
| C(7)-C(11)-H(11C)   | 109.1(17)  |
| H(11A)-C(11)-H(11C) | 107(2)     |
| H(11B)-C(11)-H(11C) | 108(2)     |

---

Table 4. Anisotropic displacement parameters ( $\text{\AA}^2 \times 10^3$ ) for erj26. The anisotropic

displacement factor exponent takes the form:  $-2p^2 [ h^2 a^{*2} U^{11} + \dots + 2 h k a^* b^* U^{12} ]$

|       | U <sup>11</sup> | U <sup>22</sup> | U <sup>33</sup> | U <sup>23</sup> | U <sup>13</sup> | U <sup>12</sup> |
|-------|-----------------|-----------------|-----------------|-----------------|-----------------|-----------------|
| S(1)  | 13(1)           | 16(1)           | 14(1)           | 1(1)            | 3(1)            | 0(1)            |
| O(1)  | 21(1)           | 27(1)           | 14(1)           | 1(1)            | 5(1)            | 4(1)            |
| O(2)  | 22(1)           | 17(1)           | 26(1)           | 3(1)            | 4(1)            | -4(1)           |
| N(1)  | 14(1)           | 15(1)           | 14(1)           | 0(1)            | 2(1)            | 1(1)            |
| C(1)  | 12(1)           | 19(1)           | 15(1)           | -4(1)           | 1(1)            | 0(1)            |
| C(2)  | 20(1)           | 30(1)           | 15(1)           | -1(1)           | -2(1)           | 5(1)            |
| C(3)  | 15(1)           | 41(1)           | 22(1)           | -6(1)           | -6(1)           | 6(1)            |
| C(4)  | 12(1)           | 36(1)           | 23(1)           | -9(1)           | 1(1)            | -2(1)           |
| C(5)  | 16(1)           | 25(1)           | 16(1)           | -3(1)           | 3(1)            | -4(1)           |
| C(6)  | 14(1)           | 16(1)           | 14(1)           | -4(1)           | -1(1)           | -2(1)           |
| C(7)  | 14(1)           | 16(1)           | 12(1)           | 0(1)            | 2(1)            | -1(1)           |
| C(8)  | 18(1)           | 19(1)           | 14(1)           | -3(1)           | -1(1)           | 0(1)            |
| C(9)  | 20(1)           | 20(1)           | 14(1)           | -1(1)           | 1(1)            | -2(1)           |
| C(10) | 21(1)           | 28(1)           | 19(1)           | 1(1)            | -3(1)           | -3(1)           |
| C(11) | 23(1)           | 16(1)           | 18(1)           | 2(1)            | 2(1)            | -1(1)           |

Table 5. Hydrogen coordinates ( $\times 10^4$ ) and isotropic displacement parameters ( $\text{\AA}^2 \times 10^3$ ) for erj26.

|        | x         | y        | z        | U(eq) |
|--------|-----------|----------|----------|-------|
| H(1)   | 190(30)   | 5630(30) | 6875(19) | 20(6) |
| H(2)   | 4280(30)  | 2750(30) | 8185(18) | 23(6) |
| H(3)   | 6870(30)  | 2970(30) | 7450(20) | 28(6) |
| H(4)   | 7230(30)  | 4240(30) | 6048(19) | 32(7) |
| H(5)   | 4960(30)  | 5170(30) | 5240(20) | 34(7) |
| H(8A)  | 2060(30)  | 4060(30) | 4474(18) | 21(6) |
| H(8B)  | 1180(30)  | 3070(20) | 5224(17) | 18(5) |
| H(10)  | -2740(40) | 4630(30) | 3840(20) | 36(7) |
| H(11A) | 2430(30)  | 6670(30) | 4925(19) | 28(6) |
| H(11B) | 1900(30)  | 7240(30) | 5932(18) | 23(6) |
| H(11C) | 570(40)   | 6830(30) | 5200(20) | 36(7) |

Table 6. Torsion angles [°] for etj26.

---

|                      |             |
|----------------------|-------------|
| O(1)-S(1)-N(1)-C(7)  | 138.66(12)  |
| O(2)-S(1)-N(1)-C(7)  | -92.16(13)  |
| C(1)-S(1)-N(1)-C(7)  | 20.23(13)   |
| O(1)-S(1)-C(1)-C(6)  | -126.43(12) |
| O(2)-S(1)-C(1)-C(6)  | 101.75(14)  |
| N(1)-S(1)-C(1)-C(6)  | -11.27(14)  |
| O(1)-S(1)-C(1)-C(2)  | 58.3(2)     |
| O(2)-S(1)-C(1)-C(2)  | -73.50(18)  |
| N(1)-S(1)-C(1)-C(2)  | 173.48(17)  |
| C(6)-C(1)-C(2)-C(3)  | 2.9(3)      |
| S(1)-C(1)-C(2)-C(3)  | 177.46(15)  |
| C(1)-C(2)-C(3)-C(4)  | -1.4(3)     |
| C(2)-C(3)-C(4)-C(5)  | -0.7(3)     |
| C(3)-C(4)-C(5)-C(6)  | 1.6(3)      |
| C(2)-C(1)-C(6)-C(5)  | -2.1(3)     |
| S(1)-C(1)-C(6)-C(5)  | -177.56(13) |
| C(2)-C(1)-C(6)-C(7)  | 174.41(17)  |
| S(1)-C(1)-C(6)-C(7)  | -1.05(18)   |
| C(4)-C(5)-C(6)-C(1)  | -0.2(3)     |
| C(4)-C(5)-C(6)-C(7)  | -176.18(17) |
| S(1)-N(1)-C(7)-C(11) | -144.84(13) |
| S(1)-N(1)-C(7)-C(6)  | -22.51(16)  |
| S(1)-N(1)-C(7)-C(8)  | 93.30(15)   |
| C(1)-C(6)-C(7)-N(1)  | 14.5(2)     |
| C(5)-C(6)-C(7)-N(1)  | -169.29(17) |
| C(1)-C(6)-C(7)-C(11) | 134.01(16)  |
| C(5)-C(6)-C(7)-C(11) | -49.8(2)    |
| C(1)-C(6)-C(7)-C(8)  | -102.40(17) |

|                      |            |
|----------------------|------------|
| C(5)-C(6)-C(7)-C(8)  | 73.8(2)    |
| N(1)-C(7)-C(8)-C(9)  | 61.96(19)  |
| C(11)-C(7)-C(8)-C(9) | -58.6(2)   |
| C(6)-C(7)-C(8)-C(9)  | 176.40(14) |

---



Table 7. Hydrogen bonds for erj26 [ $\text{\AA}$  and  $^\circ$ ].

| D-H...A            | d(D-H)  | d(H...A) | d(D...A) | $\angle(\text{DHA})$ |
|--------------------|---------|----------|----------|----------------------|
| N(1)-H(1)...O(2)#1 | 0.77(3) | 2.14(3)  | 2.903(2) | 171(3)               |

Symmetry transformations used to generate equivalent atoms:

#1  $-x, y+1/2, -z+3/2$

## E. X-ray Data Collection, Structure Solution and Refinement for (R)-5c:

CCDC 1405843

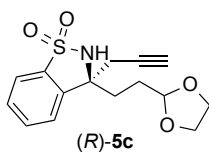

A single crystal was grown from EtOAc with slow diffusion of pentanes at room temperature. A colorless crystal of approximate dimensions 0.288 x 0.160 x 0.108 mm was mounted on a glass fiber and transferred to a Bruker SMART APEX II diffractometer. The APEX2<sup>1</sup> program package was used to determine the unit-cell parameters and for data collection (60 sec/frame scan time for a sphere of diffraction data). The raw frame data was processed using SAINT<sup>2</sup> and SADABS<sup>3</sup> to yield the reflection data file. Subsequent calculations were carried out using the SHELXTL<sup>4</sup> program. The diffraction symmetry was *mmm* and the systematic absences were consistent with the orthorhombic space group  $P2_12_12_1$  that was later determined to be correct.

The structure was solved by direct methods and refined on  $F^2$  by full-matrix least-squares techniques. The analytical scattering factors<sup>5</sup> for neutral atoms were used throughout the analysis. Hydrogen atoms were located from a difference-Fourier map and refined (*x*,*y*,*z* and  $U_{iso}$ ).

At convergence,  $wR2 = 0.0706$  and  $Goof = 1.040$  for 258 variables refined against 3562 data (0.75 Å),  $R1 = 0.0294$  for those 3283 data with  $I > 2.0\sigma(I)$ . The absolute structure was assigned by refinement of the Flack parameter<sup>6</sup>.

**References.**

1. APEX2 Version 2014.11-0, Bruker AXS, Inc.; Madison, WI 2014.
  2. SAINT Version 8.34a, Bruker AXS, Inc.; Madison, WI 2013.
  3. Sheldrick, G. M. SADABS, Version 2014/5, Bruker AXS, Inc.; Madison, WI 2014.
  4. Sheldrick, G. M. SHELXTL, Version 2014/7, Bruker AXS, Inc.; Madison, WI 2014.
  5. International Tables for Crystallography 1992, Vol. C., Dordrecht: Kluwer Academic Publishers.
  6. Flack, H. D. Acta. Cryst., A39, 876-881, 1983.
- 

**Definitions:**

$$wR2 = [\Sigma[w(F_o^2 - F_c^2)^2] / \Sigma[w(F_o^2)^2]]^{1/2}$$

$$R1 = \Sigma||F_o| - |F_c|| / \Sigma|F_o|$$

Goof = S =  $[\Sigma[w(F_o^2 - F_c^2)^2] / (n-p)]^{1/2}$  where n is the number of reflections and p is the total number of parameters refined.

The thermal ellipsoid plot is shown at the 50% probability level.

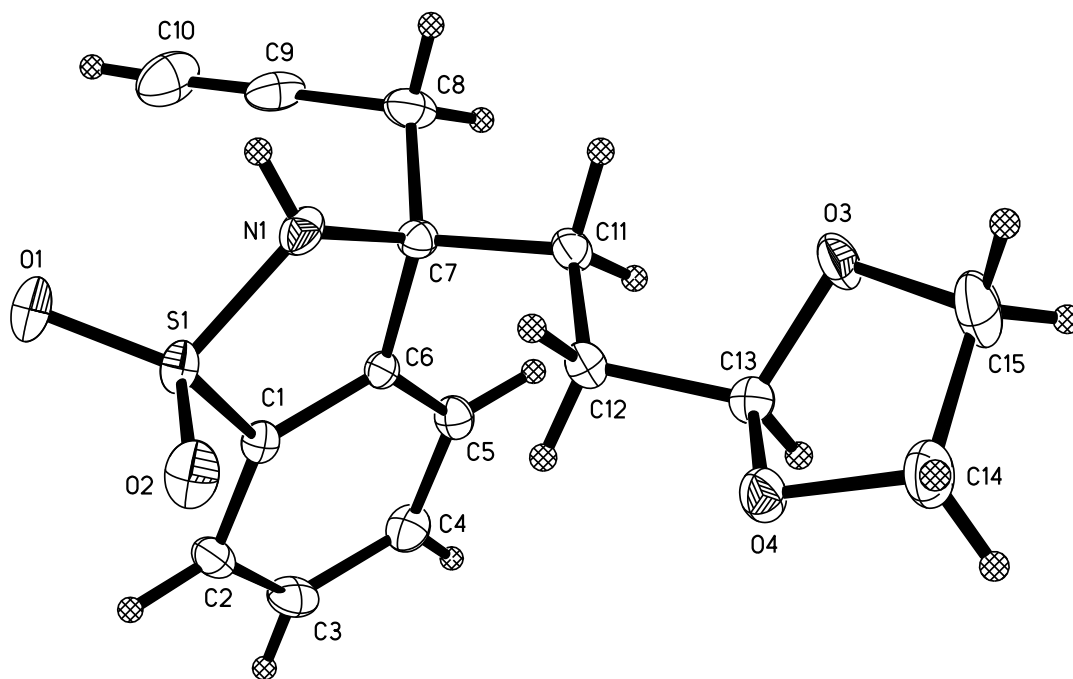

Table 1. Crystal data and structure refinement for erj22.

|                                         |                                                   |          |
|-----------------------------------------|---------------------------------------------------|----------|
| Identification code                     | erj22 (Charlotte Osborne)                         |          |
| Empirical formula                       | C <sub>15</sub> H <sub>17</sub> NO <sub>4</sub> S |          |
| Formula weight                          | 307.35                                            |          |
| Temperature                             | 133(2) K                                          |          |
| Wavelength                              | 0.71073 Å                                         |          |
| Crystal system                          | Orthorhombic                                      |          |
| Space group                             | P2 <sub>1</sub> 2 <sub>1</sub> 2 <sub>1</sub>     |          |
| Unit cell dimensions                    | a = 7.7171(5) Å                                   | a = 90°. |
|                                         | b = 7.9486(5) Å                                   | b = 90°. |
|                                         | c = 23.8160(14) Å                                 | g = 90°. |
| Volume                                  | 1460.88(16) Å <sup>3</sup>                        |          |
| Z                                       | 4                                                 |          |
| Density (calculated)                    | 1.397 Mg/m <sup>3</sup>                           |          |
| Absorption coefficient                  | 0.237 mm <sup>-1</sup>                            |          |
| F(000)                                  | 648                                               |          |
| Crystal color                           | colorless                                         |          |
| Crystal size                            | 0.288 x 0.160 x 0.108 mm <sup>3</sup>             |          |
| Theta range for data collection         | 1.710 to 28.288°                                  |          |
| Index ranges                            | -10 ≤ h ≤ 10, -10 ≤ k ≤ 10, -31 ≤ l ≤ 31          |          |
| Reflections collected                   | 17581                                             |          |
| Independent reflections                 | 3562 [R(int) = 0.0306]                            |          |
| Completeness to theta = 25.500°         | 100.0 %                                           |          |
| Absorption correction                   | Numerical                                         |          |
| Max. and min. transmission              | 0.9980 and 0.9400                                 |          |
| Refinement method                       | Full-matrix least-squares on F <sup>2</sup>       |          |
| Data / restraints / parameters          | 3562 / 0 / 258                                    |          |
| Goodness-of-fit on F <sup>2</sup>       | 1.040                                             |          |
| Final R indices [I > 2σ(I) = 3283 data] | R1 = 0.0294, wR2 = 0.0678                         |          |
| R indices (all data, 0.75 Å)            | R1 = 0.0342, wR2 = 0.0706                         |          |

|                              |                                    |
|------------------------------|------------------------------------|
| Absolute structure parameter | 0.07(2)                            |
| Largest diff. peak and hole  | 0.316 and -0.247 e.Å <sup>-3</sup> |

Table 2. Atomic coordinates ( $\times 10^4$ ) and equivalent isotropic displacement parameters ( $\text{\AA}^2 \times 10^3$ ) for erj22.  $U(\text{eq})$  is defined as one third of the trace of the orthogonalized  $U^{ij}$  tensor.

|       | x        | y       | z       | $U(\text{eq})$ |
|-------|----------|---------|---------|----------------|
| S(1)  | 9619(1)  | 2605(1) | 9054(1) | 17(1)          |
| N(1)  | 10456(2) | 3214(2) | 8456(1) | 18(1)          |
| O(1)  | 10861(2) | 1665(2) | 9377(1) | 25(1)          |
| O(2)  | 7974(2)  | 1792(2) | 8972(1) | 25(1)          |
| O(3)  | 7309(2)  | 5275(2) | 6830(1) | 22(1)          |
| O(4)  | 5065(2)  | 4151(2) | 7301(1) | 20(1)          |
| C(1)  | 9266(2)  | 4647(2) | 9298(1) | 14(1)          |
| C(2)  | 8545(3)  | 5077(3) | 9810(1) | 19(1)          |
| C(3)  | 8250(3)  | 6771(3) | 9908(1) | 22(1)          |
| C(4)  | 8676(3)  | 7967(3) | 9505(1) | 21(1)          |
| C(5)  | 9407(2)  | 7505(2) | 8996(1) | 17(1)          |
| C(6)  | 9706(2)  | 5809(2) | 8890(1) | 13(1)          |
| C(7)  | 10489(3) | 5054(2) | 8361(1) | 15(1)          |
| C(8)  | 12367(3) | 5666(3) | 8281(1) | 23(1)          |
| C(9)  | 13497(3) | 5248(3) | 8757(1) | 24(1)          |
| C(10) | 14373(3) | 4848(3) | 9138(1) | 34(1)          |
| C(11) | 9414(3)  | 5506(3) | 7836(1) | 16(1)          |
| C(12) | 7675(3)  | 4603(3) | 7816(1) | 16(1)          |
| C(13) | 6485(3)  | 5257(3) | 7365(1) | 16(1)          |
| C(14) | 4400(3)  | 4455(4) | 6752(1) | 30(1)          |
| C(15) | 5922(3)  | 5167(4) | 6424(1) | 30(1)          |

Table 3. Bond lengths [ $\text{\AA}$ ] and angles [ $^\circ$ ] for *erj22*.

---

|                |            |
|----------------|------------|
| S(1)-O(2)      | 1.4379(16) |
| S(1)-O(1)      | 1.4383(15) |
| S(1)-N(1)      | 1.6361(18) |
| S(1)-C(1)      | 1.746(2)   |
| N(1)-C(7)      | 1.480(3)   |
| O(3)-C(13)     | 1.425(2)   |
| O(3)-C(15)     | 1.445(3)   |
| O(4)-C(13)     | 1.413(2)   |
| O(4)-C(14)     | 1.425(3)   |
| C(1)-C(2)      | 1.383(3)   |
| C(1)-C(6)      | 1.384(3)   |
| C(2)-C(3)      | 1.385(3)   |
| C(3)-C(4)      | 1.390(3)   |
| C(4)-C(5)      | 1.387(3)   |
| C(5)-C(6)      | 1.391(3)   |
| C(6)-C(7)      | 1.521(3)   |
| C(7)-C(8)      | 1.541(3)   |
| C(7)-C(11)     | 1.543(3)   |
| C(8)-C(9)      | 1.468(3)   |
| C(9)-C(10)     | 1.175(3)   |
| C(11)-C(12)    | 1.523(3)   |
| C(12)-C(13)    | 1.505(3)   |
| C(14)-C(15)    | 1.519(3)   |
| O(2)-S(1)-O(1) | 115.30(10) |
| O(2)-S(1)-N(1) | 111.35(9)  |
| O(1)-S(1)-N(1) | 110.84(10) |
| O(2)-S(1)-C(1) | 108.98(9)  |
| O(1)-S(1)-C(1) | 114.11(9)  |



|                   |            |
|-------------------|------------|
| N(1)-S(1)-C(1)    | 94.39(9)   |
| C(7)-N(1)-S(1)    | 115.63(13) |
| C(13)-O(3)-C(15)  | 105.46(17) |
| C(13)-O(4)-C(14)  | 105.85(16) |
| C(2)-C(1)-C(6)    | 123.63(18) |
| C(2)-C(1)-S(1)    | 125.90(16) |
| C(6)-C(1)-S(1)    | 110.34(14) |
| C(1)-C(2)-C(3)    | 117.03(19) |
| C(2)-C(3)-C(4)    | 120.6(2)   |
| C(5)-C(4)-C(3)    | 121.3(2)   |
| C(4)-C(5)-C(6)    | 118.85(18) |
| C(1)-C(6)-C(5)    | 118.58(17) |
| C(1)-C(6)-C(7)    | 114.62(16) |
| C(5)-C(6)-C(7)    | 126.80(17) |
| N(1)-C(7)-C(6)    | 104.84(15) |
| N(1)-C(7)-C(8)    | 110.31(17) |
| C(6)-C(7)-C(8)    | 110.57(16) |
| N(1)-C(7)-C(11)   | 110.20(16) |
| C(6)-C(7)-C(11)   | 111.43(15) |
| C(8)-C(7)-C(11)   | 109.42(16) |
| C(9)-C(8)-C(7)    | 113.10(18) |
| C(10)-C(9)-C(8)   | 177.2(3)   |
| C(12)-C(11)-C(7)  | 112.91(16) |
| C(13)-C(12)-C(11) | 113.39(17) |
| O(4)-C(13)-O(3)   | 104.82(15) |
| O(4)-C(13)-C(12)  | 109.61(16) |
| O(3)-C(13)-C(12)  | 111.66(17) |
| O(4)-C(14)-C(15)  | 104.84(18) |
| O(3)-C(15)-C(14)  | 104.59(18) |

---

Table 4. Anisotropic displacement parameters ( $\text{\AA}^2 \times 10^3$ ) for erj22. The anisotropic displacement factor exponent takes the form:  $-2p^2[ h^2 a^{*2}U^{11} + \dots + 2 h k a^* b^* U^{12} ]$

|       | U <sup>11</sup> | U <sup>22</sup> | U <sup>33</sup> | U <sup>23</sup> | U <sup>13</sup> | U <sup>12</sup> |
|-------|-----------------|-----------------|-----------------|-----------------|-----------------|-----------------|
| S(1)  | 19(1)           | 12(1)           | 18(1)           | 1(1)            | -6(1)           | 0(1)            |
| N(1)  | 21(1)           | 17(1)           | 18(1)           | -4(1)           | -2(1)           | 6(1)            |
| O(1)  | 28(1)           | 20(1)           | 27(1)           | 4(1)            | -9(1)           | 5(1)            |
| O(2)  | 26(1)           | 18(1)           | 32(1)           | 1(1)            | -9(1)           | -7(1)           |
| O(3)  | 22(1)           | 31(1)           | 12(1)           | 5(1)            | -3(1)           | -6(1)           |
| O(4)  | 17(1)           | 26(1)           | 17(1)           | 4(1)            | -4(1)           | -5(1)           |
| C(1)  | 14(1)           | 13(1)           | 16(1)           | 0(1)            | -3(1)           | -1(1)           |
| C(2)  | 17(1)           | 24(1)           | 15(1)           | 3(1)            | 1(1)            | -5(1)           |
| C(3)  | 22(1)           | 28(1)           | 15(1)           | -6(1)           | 4(1)            | 0(1)            |
| C(4)  | 24(1)           | 18(1)           | 21(1)           | -4(1)           | -2(1)           | 4(1)            |
| C(5)  | 18(1)           | 16(1)           | 18(1)           | 1(1)            | -2(1)           | -2(1)           |
| C(6)  | 11(1)           | 17(1)           | 11(1)           | 1(1)            | -3(1)           | -1(1)           |
| C(7)  | 14(1)           | 16(1)           | 14(1)           | -1(1)           | 0(1)            | 1(1)            |
| C(8)  | 16(1)           | 34(1)           | 18(1)           | -2(1)           | 3(1)            | -3(1)           |
| C(9)  | 14(1)           | 31(1)           | 28(1)           | -8(1)           | 3(1)            | -1(1)           |
| C(10) | 23(1)           | 43(1)           | 34(1)           | -10(1)          | -8(1)           | 4(1)            |
| C(11) | 17(1)           | 19(1)           | 12(1)           | 1(1)            | 0(1)            | -1(1)           |
| C(12) | 19(1)           | 17(1)           | 14(1)           | 2(1)            | 0(1)            | -1(1)           |
| C(13) | 17(1)           | 15(1)           | 16(1)           | 0(1)            | 0(1)            | 0(1)            |
| C(14) | 24(1)           | 45(2)           | 22(1)           | 9(1)            | -8(1)           | -5(1)           |
| C(15) | 33(1)           | 37(1)           | 19(1)           | 9(1)            | -10(1)          | -12(1)          |

Table 5. Hydrogen coordinates ( $\times 10^4$ ) and isotropic displacement parameters ( $\text{\AA}^2 \times 10^{-3}$ ) for erj22.

|        | x         | y        | z         | U(eq)  |
|--------|-----------|----------|-----------|--------|
| H(1)   | 11280(40) | 2610(40) | 8381(11)  | 34(7)  |
| H(2B)  | 8200(40)  | 4230(40) | 10076(12) | 37(8)  |
| H(3A)  | 7770(30)  | 7090(30) | 10250(10) | 20(6)  |
| H(4A)  | 8440(30)  | 9070(40) | 9586(11)  | 28(7)  |
| H(5A)  | 9700(30)  | 8340(30) | 8715(10)  | 27(7)  |
| H(8A)  | 12820(30) | 5150(30) | 7952(11)  | 23(6)  |
| H(8B)  | 12330(30) | 6880(40) | 8216(10)  | 24(6)  |
| H(10)  | 15060(40) | 4580(40) | 9411(13)  | 51(9)  |
| H(11A) | 9240(30)  | 6750(30) | 7845(9)   | 21(6)  |
| H(11B) | 10110(30) | 5230(30) | 7509(10)  | 15(5)  |
| H(12A) | 7860(30)  | 3410(30) | 7749(10)  | 20(6)  |
| H(12B) | 7070(30)  | 4720(30) | 8154(11)  | 23(6)  |
| H(13A) | 6040(30)  | 6350(30) | 7452(9)   | 12(5)  |
| H(14A) | 3410(40)  | 5190(40) | 6780(12)  | 40(8)  |
| H(14B) | 4030(50)  | 3470(50) | 6598(15)  | 67(11) |
| H(15A) | 6290(40)  | 4470(40) | 6122(14)  | 55(10) |
| H(15B) | 5690(30)  | 6250(30) | 6278(11)  | 27(7)  |

<sup>1</sup>H spectrum

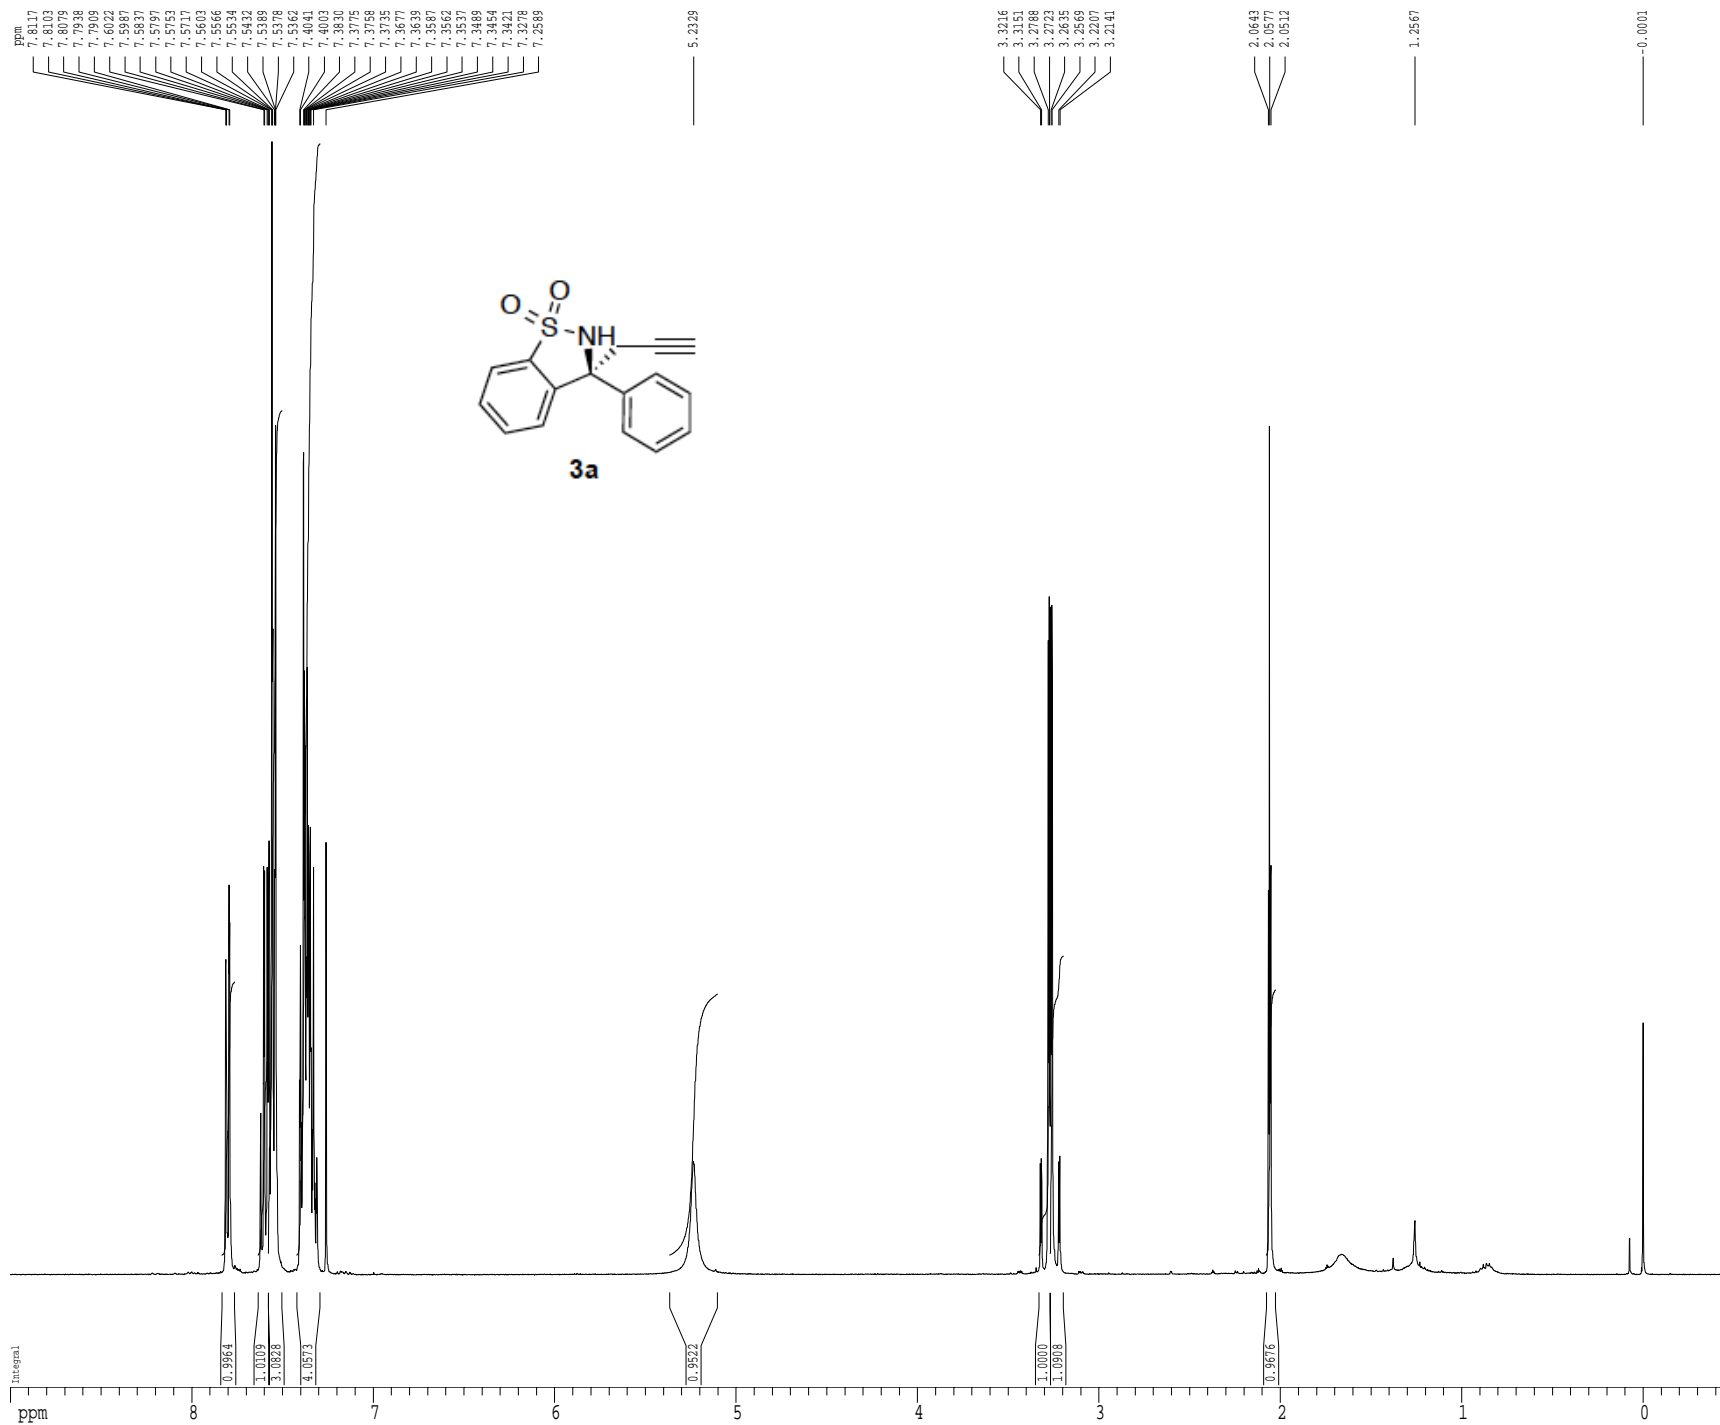

Current Data Parameters  
 USER osborn  
 NAME CAO-III-1868-SI  
 EXPNO 3  
 PROCNO 1

F2 - Acquisition Parameters  
 Date\_ 20150519  
 Time 13.16  
 INSTRUM drx400  
 PROBRHD 5 mm QNP H/P/P  
 PULPROG zg30  
 TD 65536  
 SOLVENT CDCl3  
 NS 8  
 DS 2  
 SWH 6410.256 Hz  
 FIDRES 0.097813 Hz  
 AQ 5.1118579 sec  
 RG 203.2  
 DW 78.000 usec  
 DE 4.50 usec  
 TE 298.0 K  
 D1 0.10000000 sec  
 MCREST 0.00000000 sec  
 MCWREK 0.01500000 sec

===== CHANNEL f1 =====  
 NUC1 1H  
 P1 12.00 usec  
 PL1 0.00 dB  
 SF01 400.1328009 MHz

F2 - Processing parameters  
 SI 65536  
 SF 400.1300212 MHz  
 WDW EM  
 SSB 0  
 LB 0.30 Hz  
 GB 0  
 PC 2.00

1D NMR plot parameters  
 CX 22.80 cm  
 CY 15.00 cm  
 F1P 9.000 ppm  
 F1 3601.17 Hz  
 F2P -0.500 ppm  
 F2 -200.06 Hz  
 PPMCM 0.41667 ppm/cm  
 HZCM 166.72086 Hz/cm

Z-restored spin-echo 13C spectrum with 1H decoupling

ppm

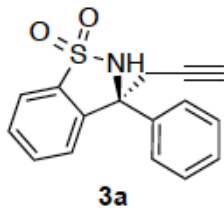

142.44  
140.39  
135.02  
133.46  
129.17  
128.71  
126.60  
124.97  
121.48

78.53  
77.42  
77.16  
76.91  
73.33  
67.10

31.35

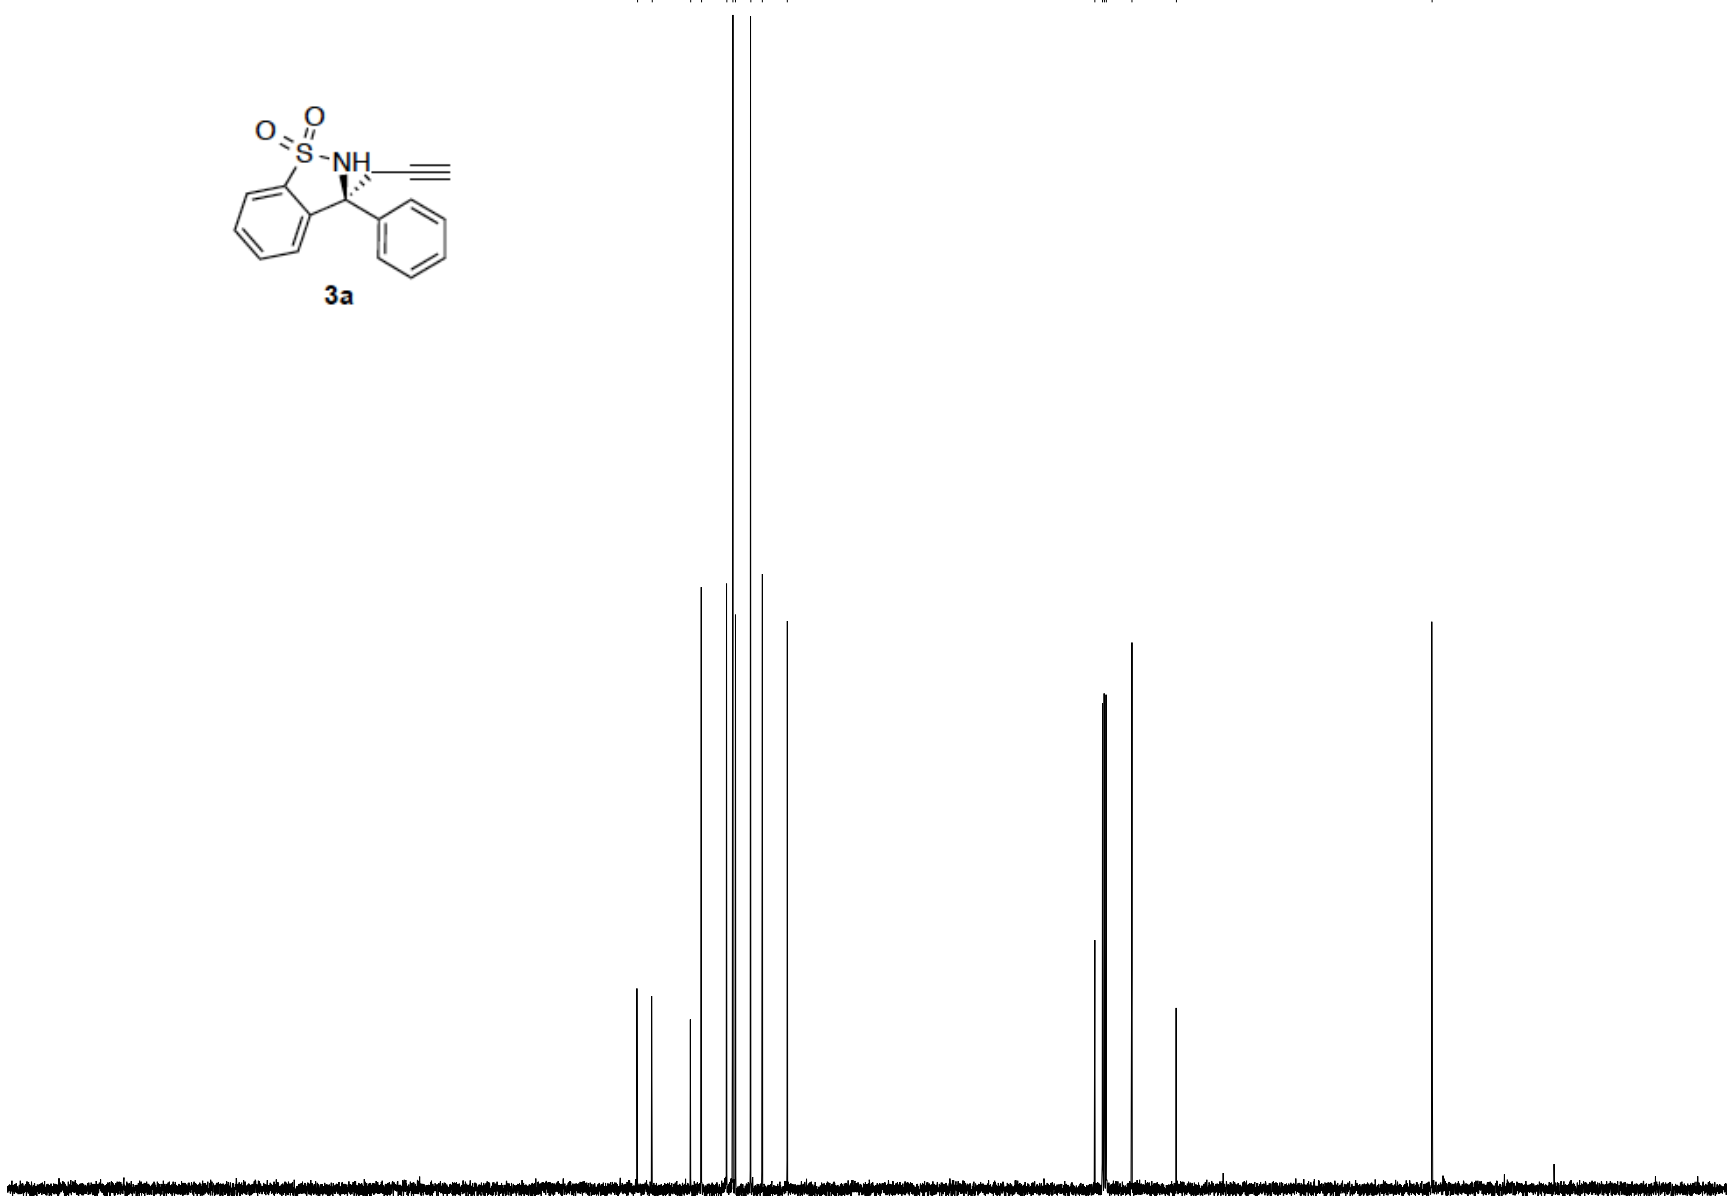

```

Current Data Parameters
USER          osborn
NAME         CAO-III-188B-SI
EXPNO        2
PROCNO       1

F2 - Acquisition Parameters
Date_        20150331
Time         16.21
INSTRUM      cryo500
PROBHD       5 mm CPTCI 1H-
PULPROG      SpinEchopg30gp.prd
TD           65536
SOLVENT      CDCl3
NS           81
DS           16
SWH          30303.031 Hz
FIDRES       0.462388 Hz
AQ           1.0813940 sec
RG           3649.1
DW           16.500 usec
DE           6.00 usec
TE           298.0 K
D1           0.25000000 sec
d11          0.03000000 sec
D16          0.00020000 sec
d17          0.00019600 sec
MCREST       0.00000000 sec
MCMRXC       0.01500000 sec
P2           33.10 usec

===== CHANNEL f1 =====
NUC1         13c
P1           16.55 usec
P11          500.00 usec
P12          2000.00 usec
PL0          120.00 dB
PL1          -1.00 dB
SFO1         125.7942548 MHz
SF1          2.70 dB
SF2          2.70 dB
SFO1M1       Crp60,0.5,20.1
SFO1M2       Crp60comp,4
SFOFF1       0.00 Hz
SFOFF2       0.00 Hz

===== CHANNEL f2 =====
CPDPRG2     waltz16
NUC2         1H
PCPD2       100.00 usec
PL2         1.60 dB
PL12        24.50 dB
SFO2        500.2225011 MHz

===== GRADIENT CHANNEL =====
GENAM1      SINE.100
GENAM2      SINE.100
GFX1        0.00 %
GFX2        0.00 %
GPF1        0.00 %
GPF2        0.00 %
GPF3        0.00 %
GPF4        30.00 %
GPF5        50.00 %
p15         500.00 usec
p16         1000.00 usec

F2 - Processing parameters
SI          65536
SF          125.7804122 MHz
WDW         EM
SSB         0
LB          1.00 Hz
GB          0
PC          2.00

1D NMR plot parameters
CX          22.80 cm
CY          15.65 cm
F1P         230.637 ppm
F1          29009.68 Hz
F2P         -10.287 ppm
F2          -1293.96 Hz
PFMCM       10.56688 ppm/cm
HZCM        1329.10693 Hz/cm
    
```

ppm 200 150 100 50 0

<sup>1</sup>H spectrum

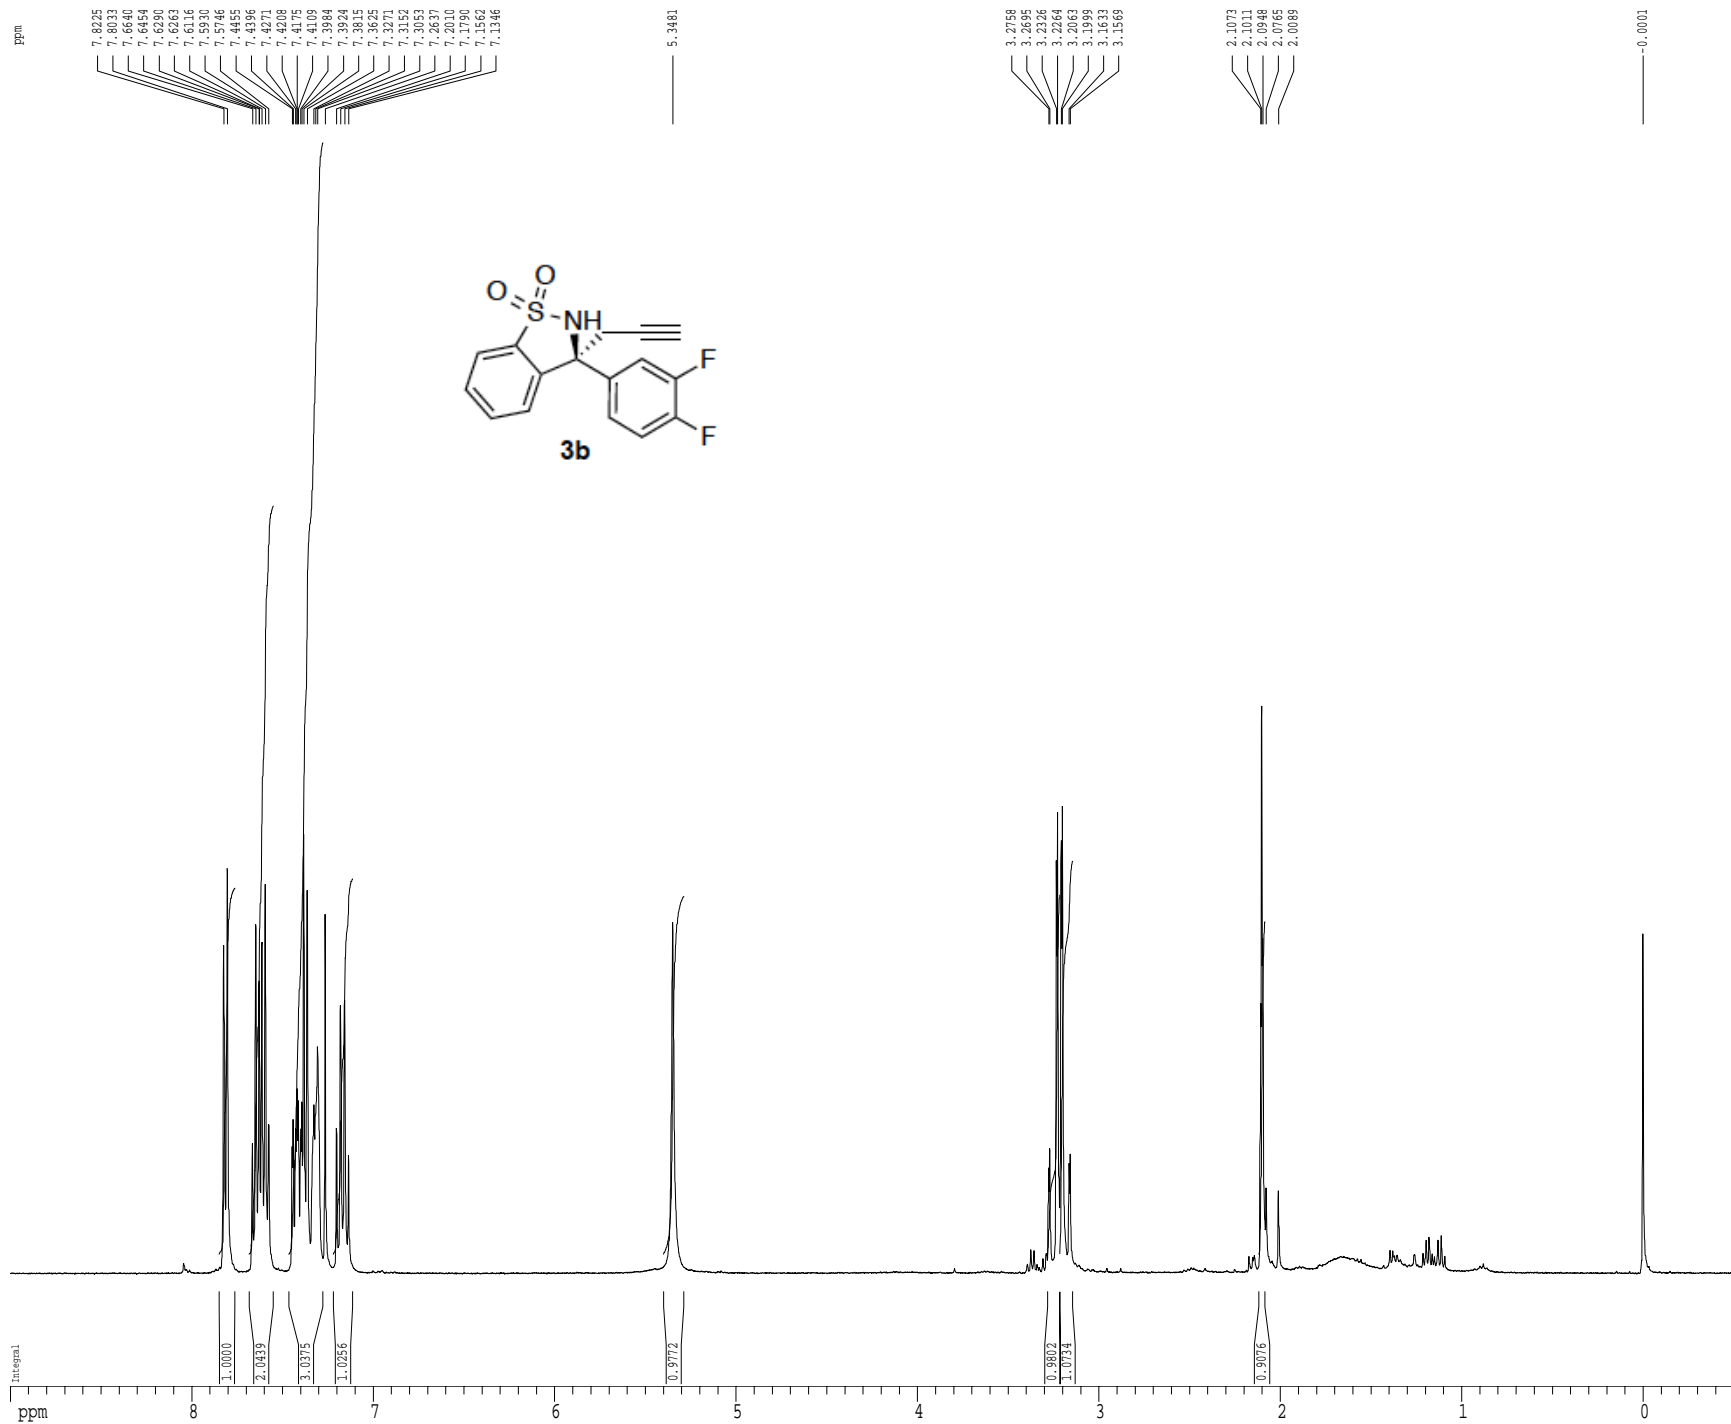

```

Current Data Parameters
NAME      endean
EXPNO     1
PROCNO    1

F2 - Acquisition Parameters
Date_     20150511
Time      2.37
INSTRUM   drx400
PROBHD    5 mm QNP H/P/
PULPROG   zg30
TD        65536
SOLVENT   CDCl3
NS         8
DS         2
SWH        6410.256 Hz
FIDRES     0.097813 Hz
AQ         5.1118579 sec
RG         322.5
DM         78.000 usec
DE         4.50 usec
TE         298.0 K
D1         0.10000000 sec
MCREST    0.00000000 sec
MCWEX     0.01500000 sec

***** CHANNEL f1 *****
NUC1       1H
P1         12.00 usec
PL1        0.00 dB
SFO1      400.1328009 MHz

F2 - Processing parameters
SI         65536
SF         400.1300191 MHz
WDW        EM
SSB        0
LB         0.30 Hz
GB         0
PC         2.00

ID NMR plot parameters
CX         22.80 cm
CY         7.50 cm
F1P        9.000 ppm
F1         3601.17 Hz
F2P        -0.500 ppm
F2         -200.06 Hz
PPMCM      0.41667 ppm/cm
HZCM       166.72084 Hz/cm
    
```

Z-restored spin-echo 13C spectrum with 1H decoupling

ppm

151.33  
151.27  
151.21  
151.17  
149.35  
149.27  
149.25  
149.17  
141.43  
137.48  
134.46  
133.86  
130.20  
124.43  
122.83  
122.80  
122.78  
122.75  
121.62  
117.80  
117.66  
116.35  
116.19

77.64  
77.61  
77.28  
77.03  
76.78  
73.74  
66.14

0.00

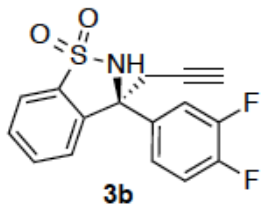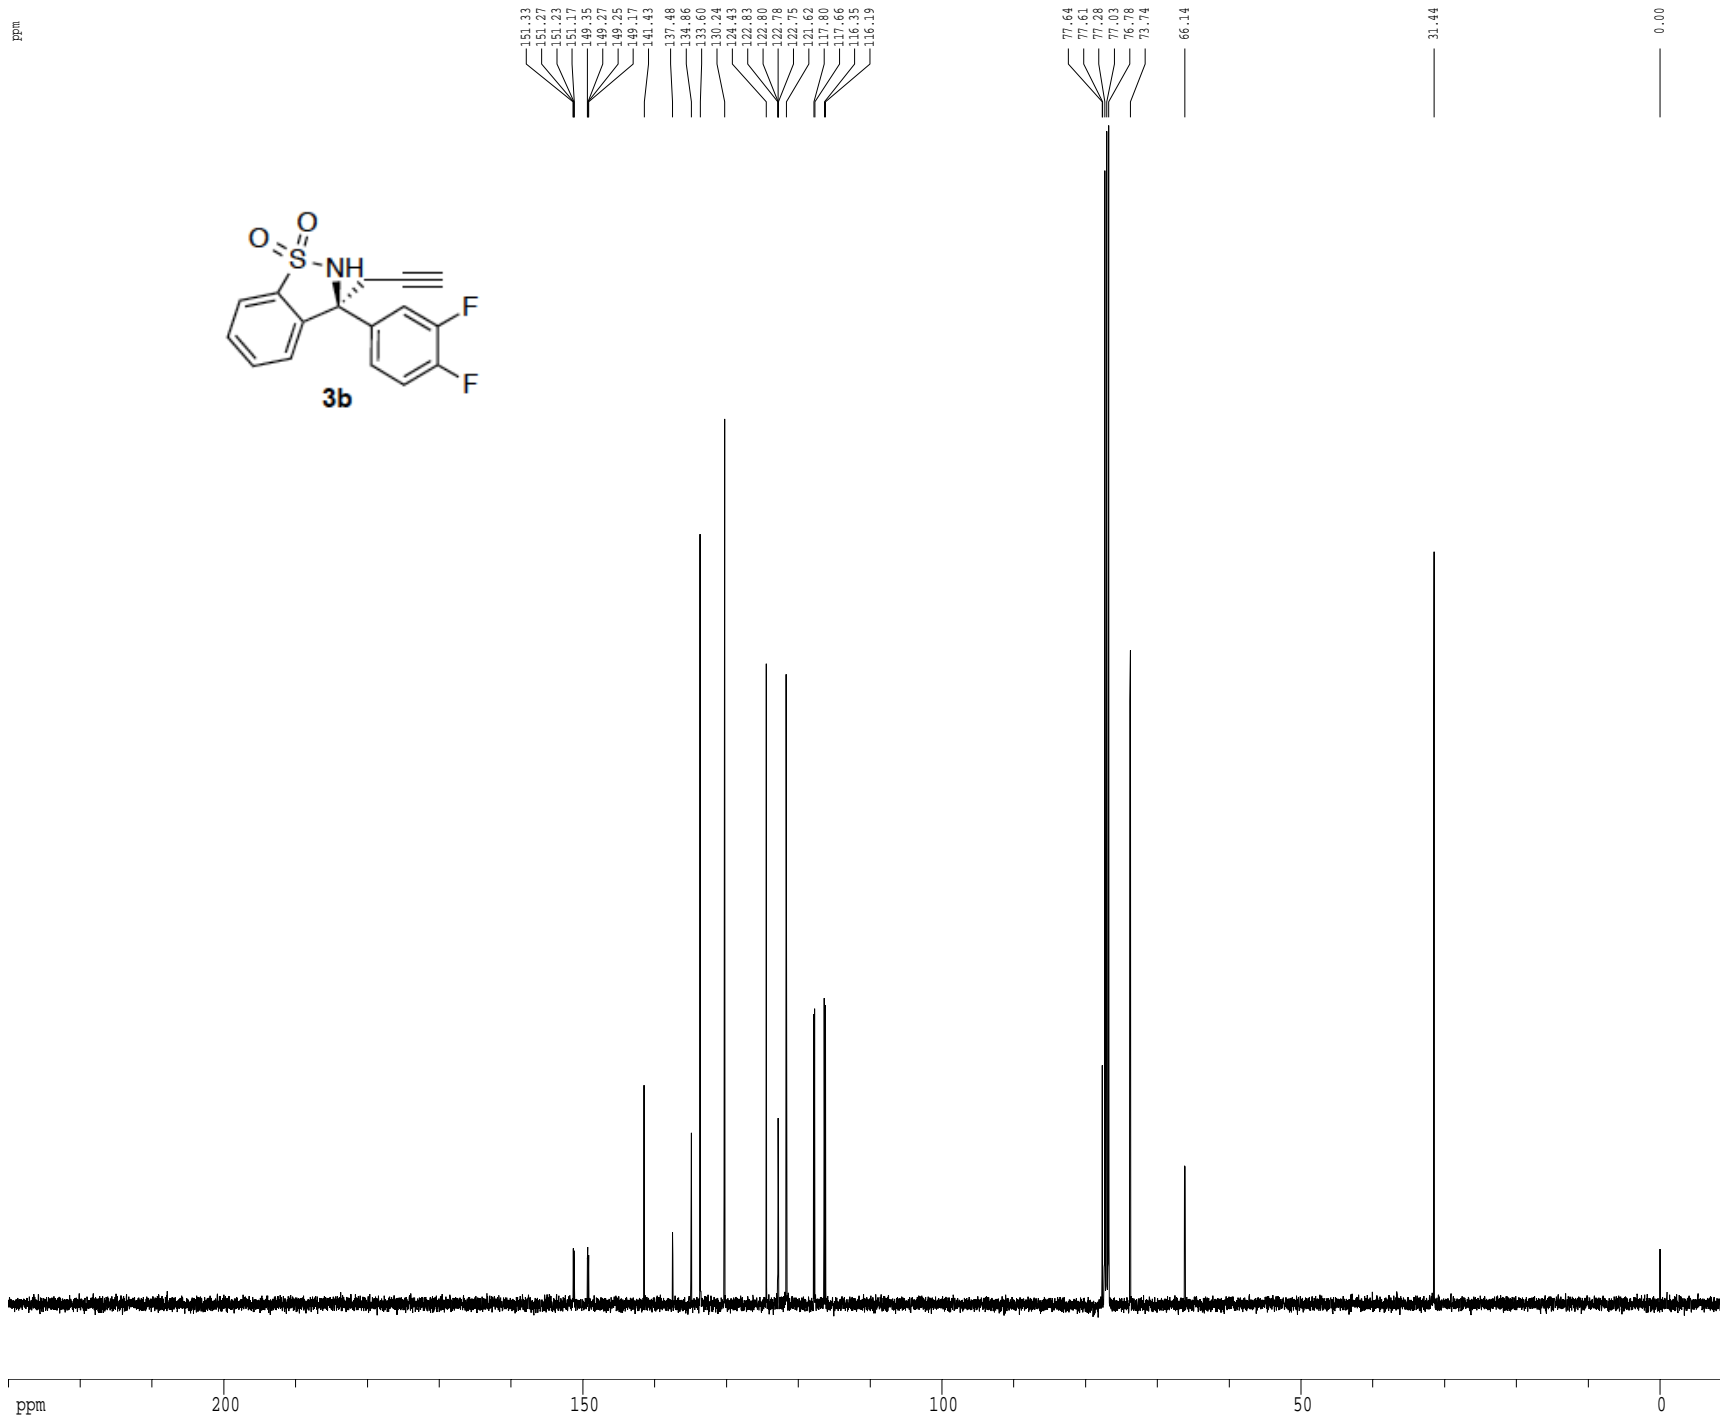

```

Current Data Parameters
USER          endean
NAME         TR02-1-140-rsp-pure-char-paper
EXPNO        2
PROCNO       1

F2 - Acquisition Parameters
Date_        20150603
Time         22.23
INSTRUM      cryo500
PROBHD       5 mm CPCCI 1H-
PULPROG      Spinhoprog2
TD           65536
SOLVENT      CDCl3
NS           1024
DS           16
SMH          30303.031 Hz
FIDRES       0.462388 Hz
AQ           1.0813940 sec
RG           7298.2
EM           16.500 usec
DE           6.00 usec
TE           298.0 K
DL           0.2500000 sec
d11          0.0300000 sec
d16          0.0020000 sec
d17          0.0019600 sec
MCWREST      0.0000000 sec
MCWEX        0.0150000 sec
P2           33.10 usec

***** CHANNEL f1 *****
NUC1          13C
P1           16.50 usec
P11          500.00 usec
P12          2000.00 usec
PL0          12.00 dB
PL1          -1.00 dB
SFO1         125.7842548 MHz
SF1          2.70 dB
SF2          2.70 dB
SFOFF1       Cmp60, 0.5, 20.1
SFOFF2       Cmp60comp, 4
SFOFF3       0.00 Hz
SFOFF4       0.00 Hz

***** CHANNEL f2 *****
CPDPRG2      waltz16
NUC2          1H
PCPD2        100.00 usec
PL2          1.60 dB
PL12         24.50 dB
SFO2         500.2225011 MHz

***** GRADIENT CHANNEL *****
GPRAM1       SINE.100
GPRAM2       SINE.100
GPX1         0.00 %
GPX2         0.00 %
GPY1         0.00 %
GPY2         0.00 %
GPZ1         30.00 %
GPZ2         50.00 %
p15          500.00 usec
p16          1000.00 usec

F2 - Processing parameters
SI           65536
SF           125.7842548 MHz
WDW          EM
SSB          0
LB           1.00 Hz
GB           0
PC           2.00

ID NMR plot parameters
CX           22.80 cm
CY           15.60 cm
FIP          230.000 ppm
F1           28924.50 Hz
F2P          -10.000 ppm
F2           -1257.80 Hz
PPMCM        10.52632 ppm/cm
HZCM         1324.00452 Hz/cm
    
```

19F spectrum

ppm

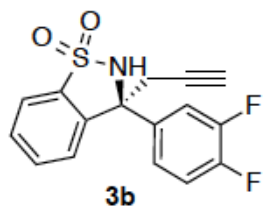

135.67  
135.69  
135.70  
135.71  
135.72  
135.73  
135.74  
135.75  
135.76  
135.77  
135.78  
135.79  
135.80  
135.81  
135.82  
135.83  
135.84  
135.85  
135.86  
135.87  
135.88  
135.89  
135.90  
135.91  
135.92  
135.93  
135.94  
135.95  
135.96  
135.97  
135.98  
135.99  
136.00  
136.01  
136.02  
136.03  
136.04  
136.05  
136.06  
136.07  
136.08  
136.09  
136.10  
136.11  
136.12  
136.13  
136.14  
136.15  
136.16  
136.17  
136.18  
136.19  
136.20  
136.21  
136.22  
136.23  
136.24  
136.25  
136.26  
136.27  
136.28  
136.29  
136.30  
136.31  
136.32  
136.33  
136.34  
136.35  
136.36  
136.37  
136.38  
136.39  
136.40  
136.41  
136.42  
136.43  
136.44  
136.45  
136.46  
136.47  
136.48  
136.49  
136.50  
136.51  
136.52  
136.53  
136.54  
136.55  
136.56  
136.57  
136.58  
136.59  
136.60  
136.61  
136.62  
136.63  
136.64  
136.65  
136.66  
136.67  
136.68  
136.69  
136.70  
136.71  
136.72  
136.73  
136.74

Current Data Parameters  
USER endean  
NAME TBDE-I-120-prop-char  
EXPNO 3  
PROCNO 1

F2 - Acquisition Parameters  
Date\_ 20141124  
Time 13.59  
INSTRUM drx400  
PROBHD 5 mm QNP H/P/P  
PULPROG zgpg30  
TD 65536  
SOLVENT CDCl3  
NS 48  
DS 2  
SWH 75187.969 Hz  
FIDRES 1.147277 Hz  
AQ 0.4358644 sec  
RG 3251  
DW 6.650 usec  
DE 9.46 usec  
TE 297.9 K  
D1 2.0000000 sec

\*\*\*\*\* CHANNEL f1 \*\*\*\*\*  
NUC1 19F  
P1 22.50 usec  
PL1 -6.00 dB  
SFO1 376.4646491 MHz

F2 - Processing parameters  
SI 65536  
SF 376.4984640 MHz  
WDW EM  
SSB 0  
LB 1.00 Hz  
GB 0  
PC 1.00

1D NMR plot parameters  
CX 22.80 cm  
CY 15.00 cm  
F1P 1.000 ppm  
F1 376.50 Hz  
F2P -190.000 ppm  
F2 -71534.71 Hz  
DFMCM 8.37719 ppm/cm  
H2CM 3154.00049 Hz/cm

ppm -20 -40 -60 -80 -100 -120 -140 -160 -180



<sup>1</sup>H spectrum

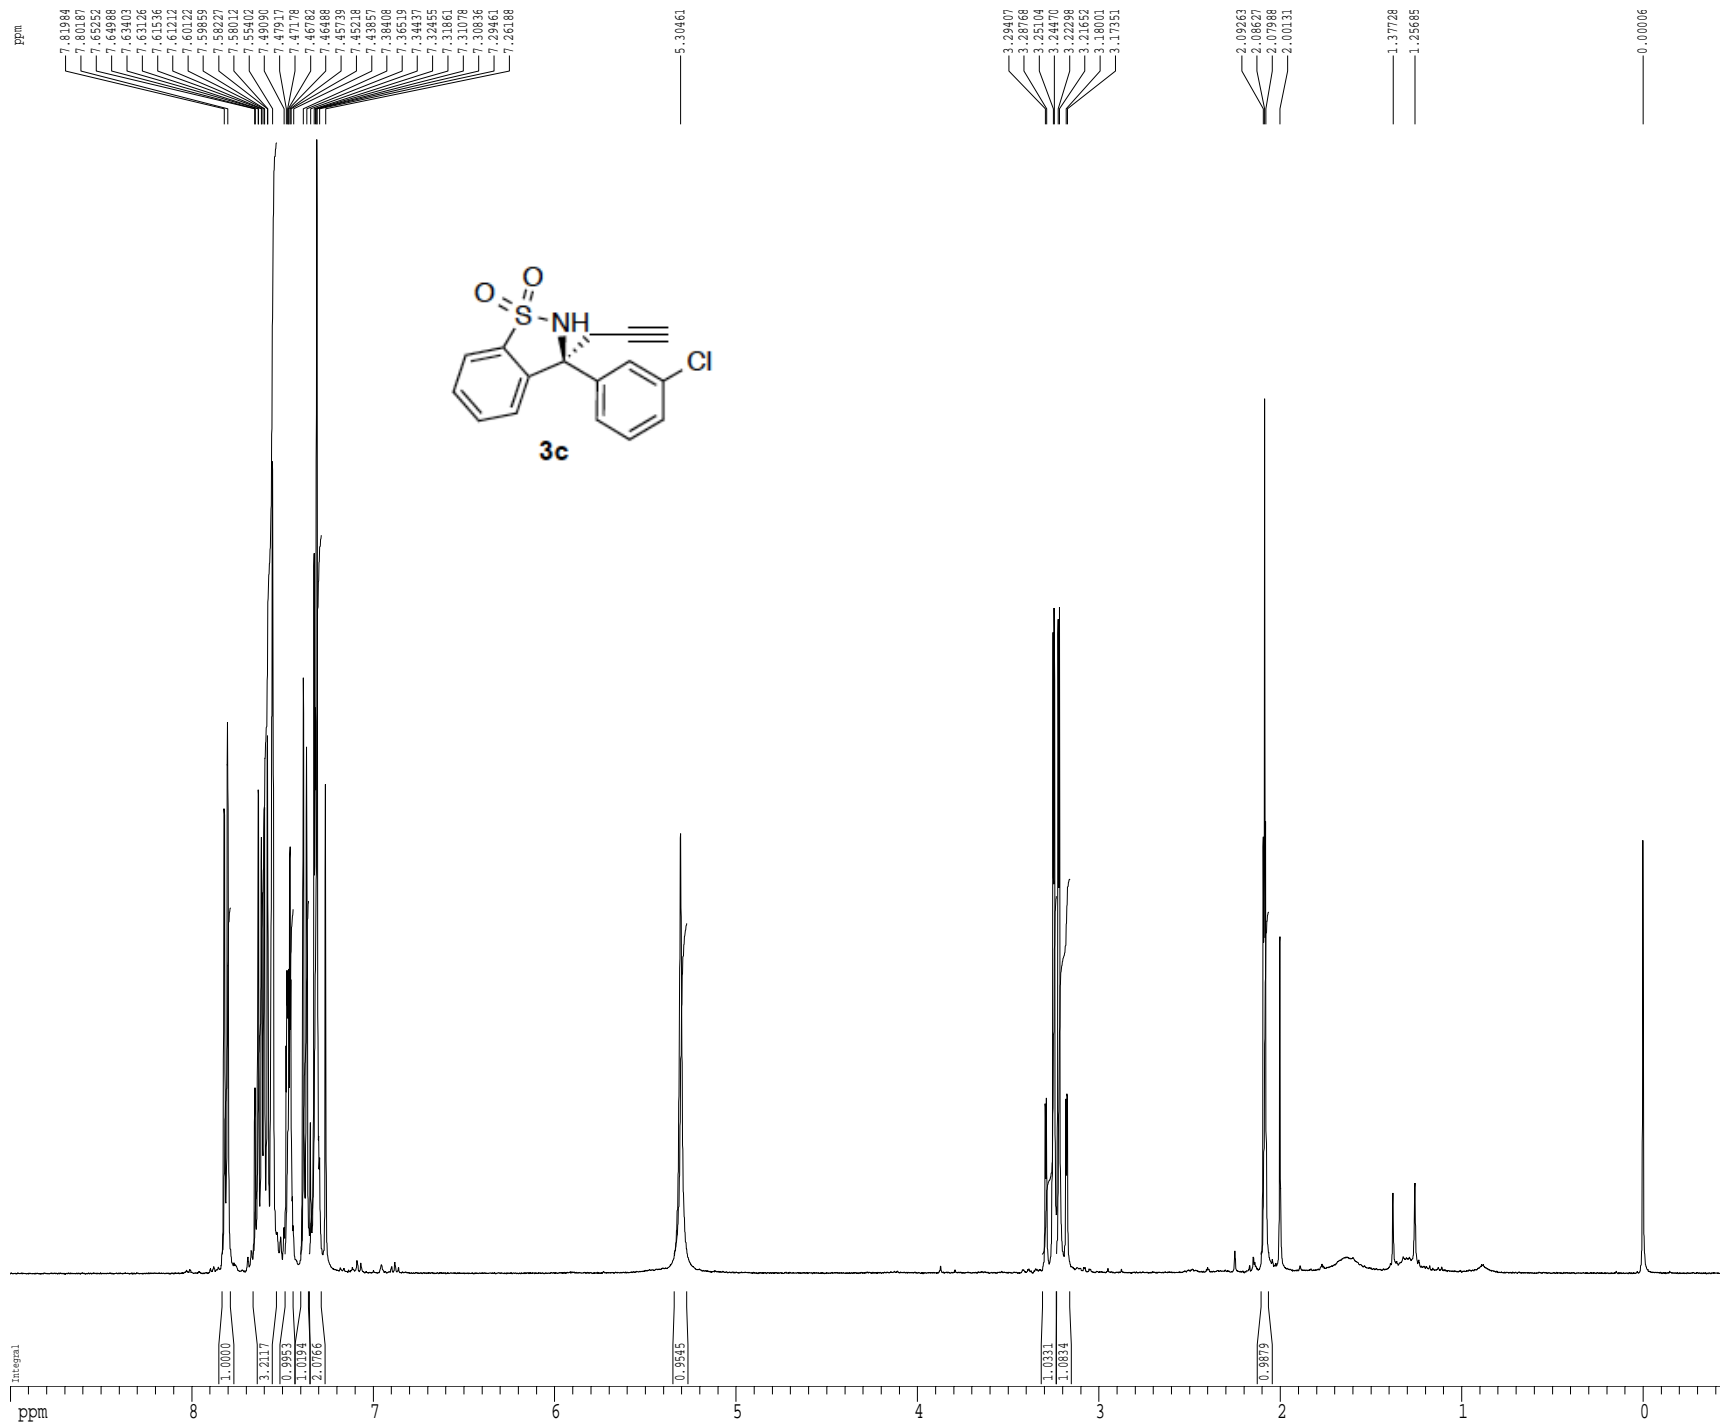

```

Current Data Parameters
NAME      endean
EXPNO     1
PROCNO    1

F2 - Acquisition Parameters
Date_     20150511
Time      2.45
INSTRUM   spect
PROBHD    5 mm QNP H/F/P
PULPROG   zg30
TD         65536
SOLVENT   CDCl3
NS         8
DS         2
SWH        6410.256 Hz
FIDRES     0.097813 Hz
AQ         5.1118579 sec
RG         256
DM         78.000 usec
DE         4.50 usec
TE         298.0 K
D1         0.10000000 sec
MCREST    0.00000000 sec
MCWEX     0.01500000 sec

***** CHANNEL f1 *****
NUC1      1H
P1        12.00 usec
PE1       0.00 dB
SFO1     400.1328009 MHz

F2 - Processing parameters
SI         65536
SF        400.1300198 MHz
WDW        EM
SSB        0
LB         0.30 Hz
GB         0
PC         2.00

ID NMR plot parameters
CX         22.80 cm
CY         15.00 cm
F1P        9.000 ppm
F1         3601.17 Hz
F2P        -0.500 ppm
F2         -200.06 Hz
PPMCM     0.41667 ppm/cm
HZCM      166.72084 Hz/cm
    
```

Z-restored spin-echo 13C spectrum with 1H decoupling

ppm

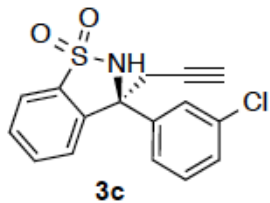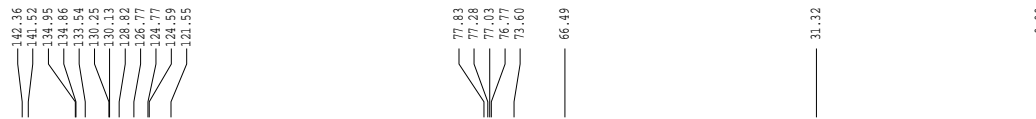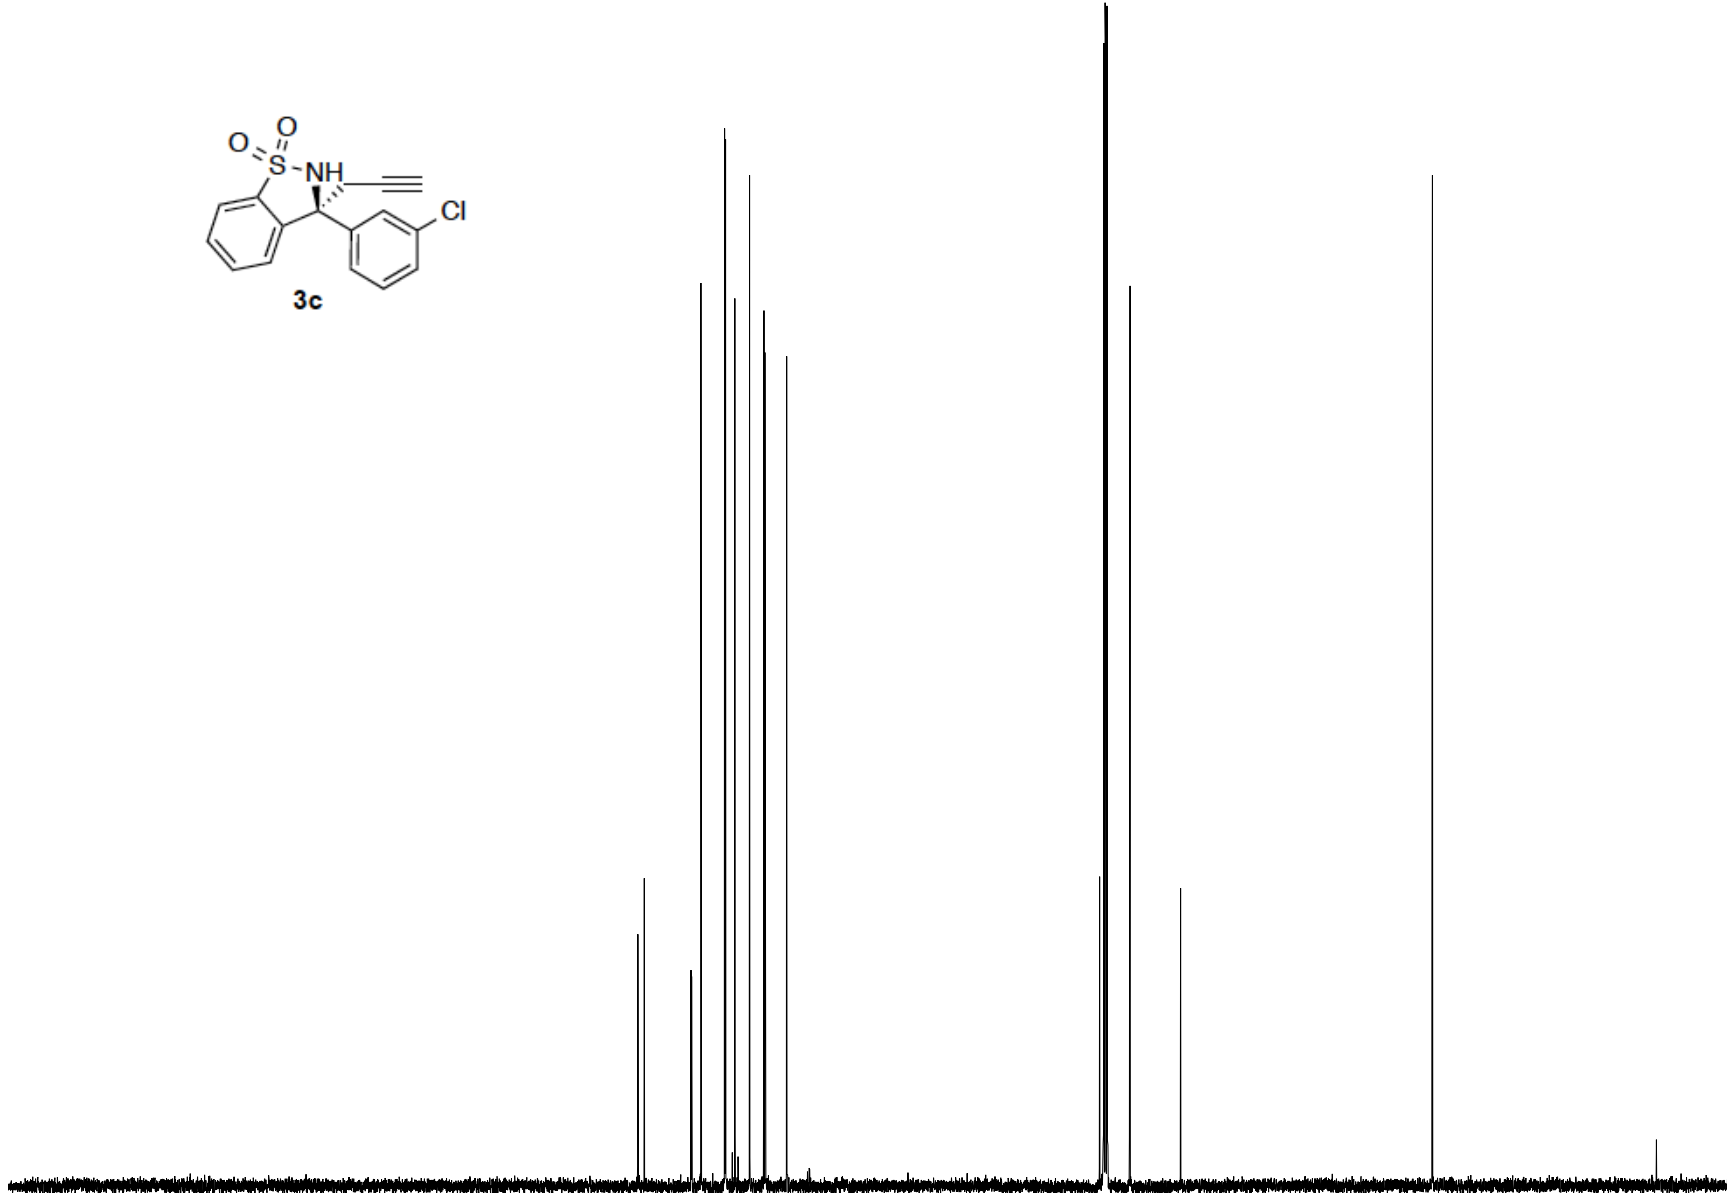

```

Current Data Parameters
USER      endean
NAME      TR02-1-141-rsp-pure-char-paper
EXPNO     2
PROCNO    1

F2 - Acquisition Parameters
Date_     20150603
Time      23.06
INSTRUM   cryo500
PROBHD    5 mm CPCCI 1H
PULPROG   SpunEchozgpgp
TD         65536
SOLVENT   CDCl3
NS         1024
DS         16
SWH        30303.031 Hz
FIDRES     0.462388 Hz
AQ         1.0813940 sec
RG         4597.6
EM         16.500 usec
DE         6.00 usec
TE         298.0 K
DL         0.2500000 sec
d11        0.0300000 sec
d16        0.0020000 sec
d17        0.0019600 sec
MCREST     0.0000000 sec
MCWEX      0.0150000 sec
P2         33.10 usec

***** CHANNEL f1 *****
NUC1       13C
P1         16.50 usec
P11        500.00 usec
P12        2000.00 usec
PL0        120.00 dB
PL1        -1.00 dB
SFO1       125.7842548 MHz
SF1        2.70 dB
SF2        2.70 dB
SFOFF1     Cnp60,0.5,20.1
SFOFF2     Cnp60comp,4
SPOFF1     0.00 Hz
SPOFF2     0.00 Hz

***** CHANNEL f2 *****
CPDPRG2   waltz16
NUC2       1H
PCPD2     100.00 usec
PL2        1.60 dB
PL12       24.50 dB
SFO2       500.2225011 MHz

***** GRADIENT CHANNEL *****
GPRAM1    SINE.100
GPRAM2    SINE.100
GPX1      0.00 %
GPX2      0.00 %
GPY1      0.00 %
GPY2      0.00 %
GPH1      30.00 %
GPH2      50.00 %
p15       500.00 usec
p16       1000.00 usec

F2 - Processing parameters
SI         65536
SF         125.7804272 MHz
WDW        EM
SSB        0
LB         1.00 Hz
GB         0
PC         2.00

1D NMR plot parameters
CX         22.80 cm
CY         15.63 cm
FIP        230.637 ppm
F1         29009.68 Hz
F2P        -10.287 ppm
F2         -1293.96 Hz
PPMCM      10.56688 ppm/cm
HSCM       1329.10718 Hz/cm
    
```

ppm

<sup>1</sup>H spectrum

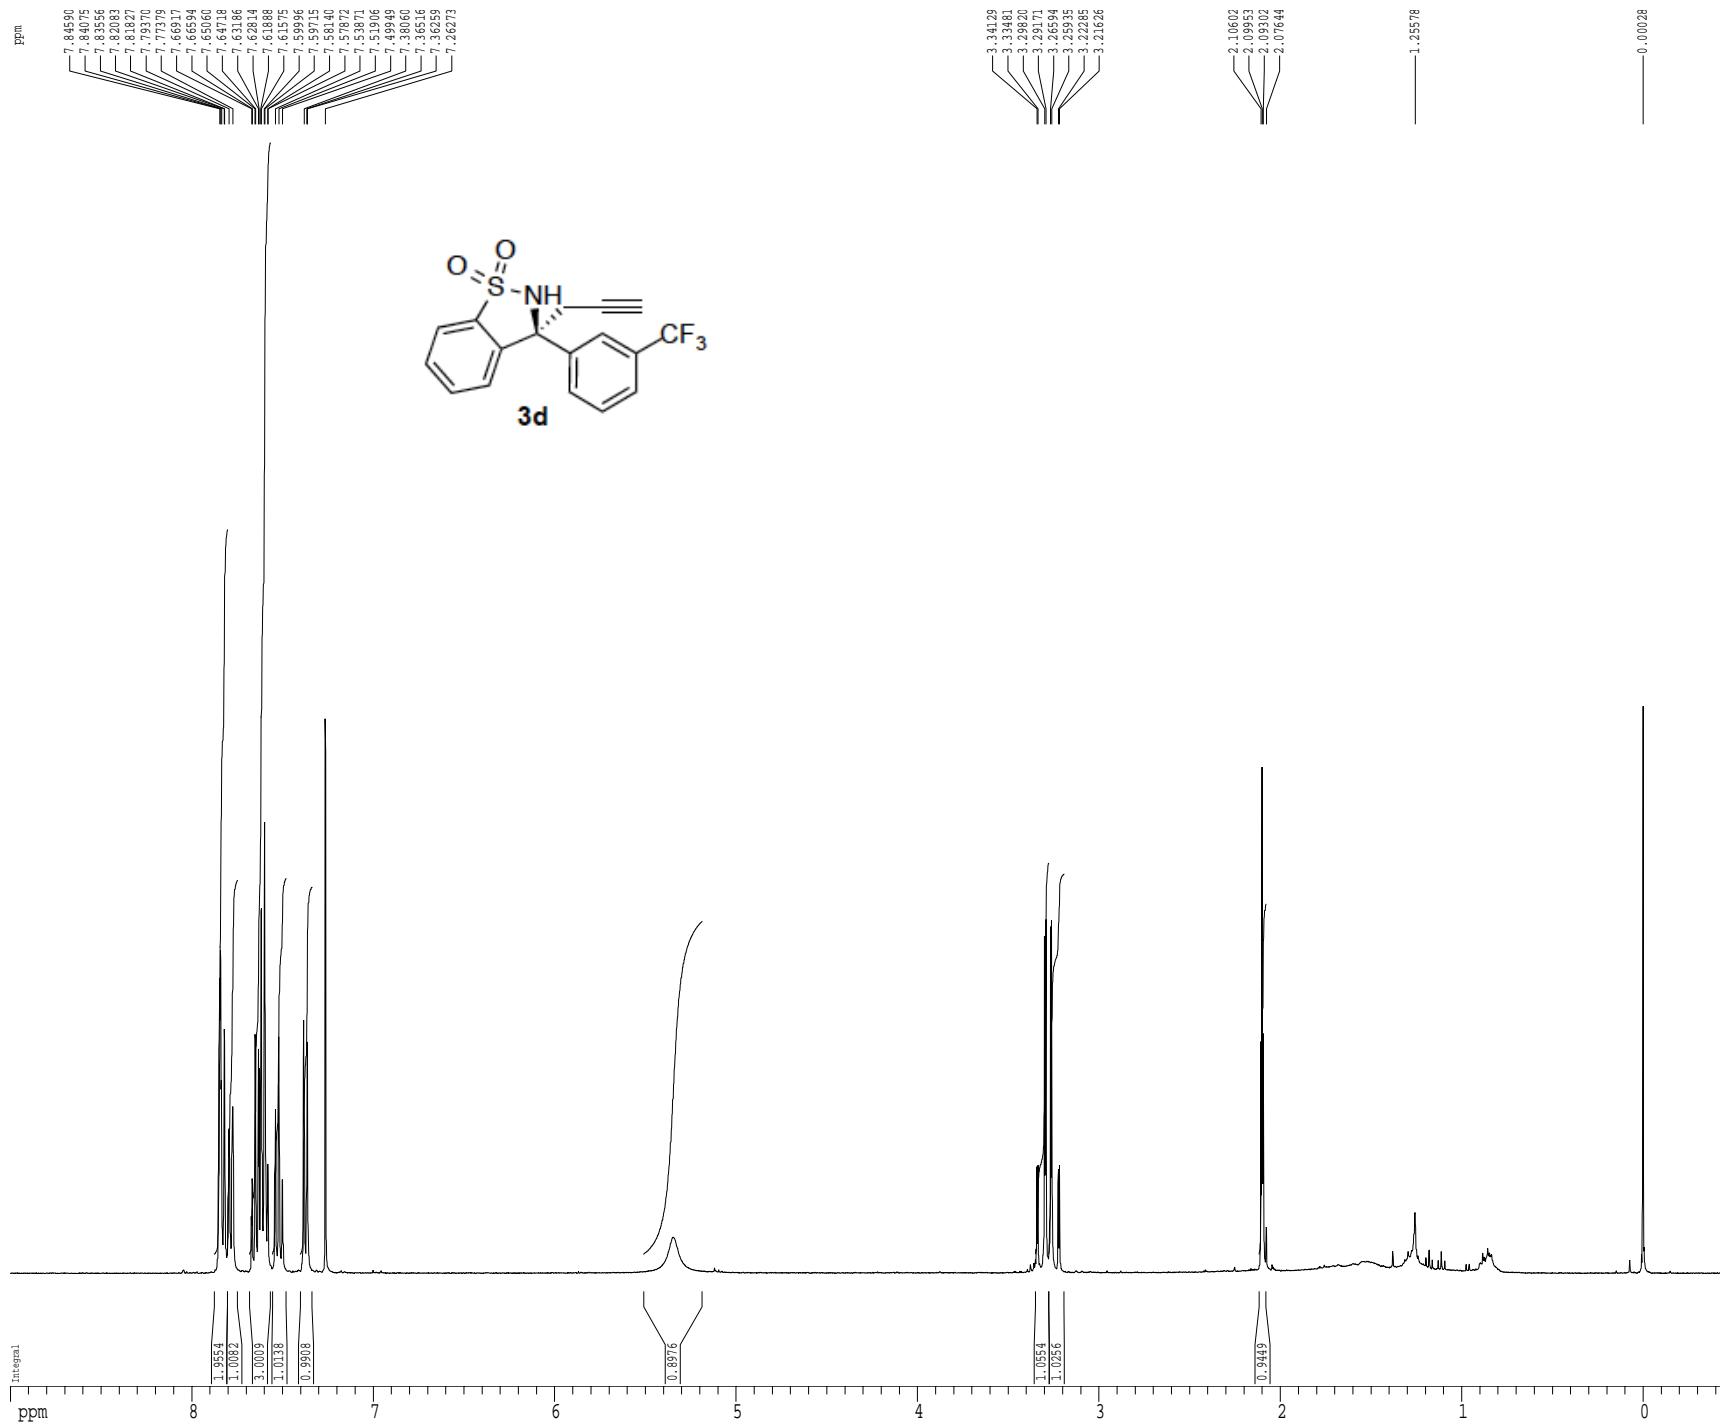

Current Data Parameters  
 USER osborn  
 NAME CAO-III-75B-SI  
 EXPNO 5  
 PROCNO 1

F2 - Acquisition Parameters  
 Date\_ 20150526  
 Time 14.35  
 INSTRUM drx400  
 PROBHND 5 mm QNP H/P/P  
 PULPROG zg30  
 TD 65536  
 SOLVENT CDCl3  
 NS 8  
 DS 2  
 SWH 6410.256 Hz  
 FIDRES 0.097813 Hz  
 AQ 5.1118579 sec  
 RG 362  
 DW 78.000 usec  
 DE 4.50 usec  
 TE 295.8 K  
 D1 0.10000000 sec  
 MCREST 0.00000000 sec  
 MCWRR 0.01500000 sec

===== CHANNEL f1 =====  
 NUC1 1H  
 P1 12.00 usec  
 PL1 0.00 dB  
 SF01 400.1328009 MHz

F2 - Processing parameters  
 SI 65536  
 SF 400.1300197 MHz  
 WDW EM  
 SSB 0  
 LB 0.30 Hz  
 GB 0  
 PC 2.00

1D NMR plot parameters  
 CX 22.80 cm  
 CY 7.50 cm  
 F1P 9.000 ppm  
 F1 3601.17 Hz  
 F2P -0.500 ppm  
 F2 -200.06 Hz  
 PPMCM 0.41667 ppm/cm  
 HZCM 166.72084 Hz/cm

Z-restored spin-echo 13C spectrum with 1H decoupling

ppm

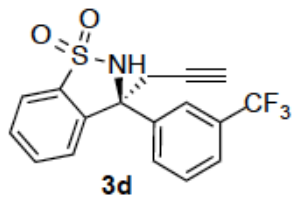

141.61  
141.58  
133.09  
131.56  
131.29  
130.38  
130.34  
129.75  
125.66  
125.63  
125.60  
124.99  
124.61  
123.31  
123.28  
123.25  
122.82  
121.79

77.73  
77.41  
77.16  
76.91  
73.95

66.67

31.52

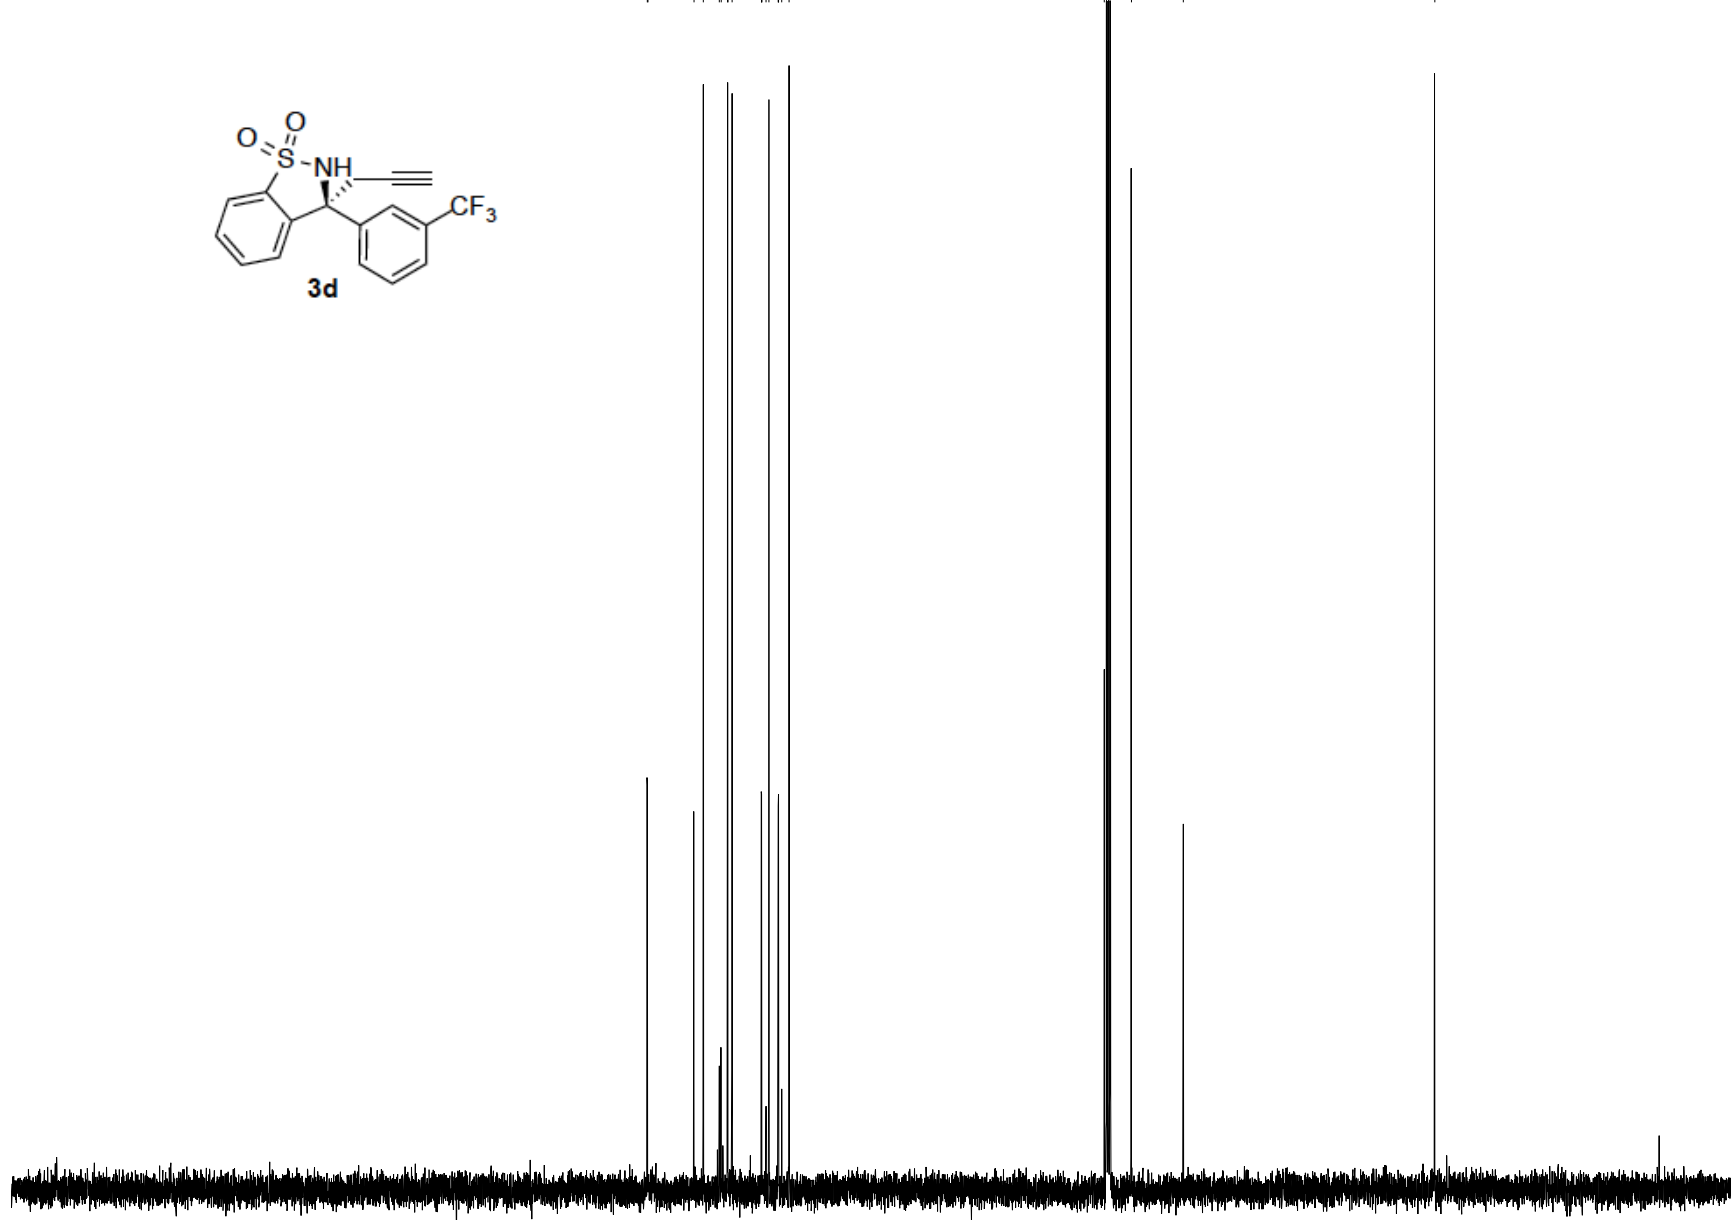

```

Current Data Parameters
USER          osborn
NAME          CAO-III-75B-SI
EXPNO         4
PROCNO        1

F2 - Acquisition Parameters
Date_         20150525
Time          19.03
INSTRUM       cryo500
PROBHD        5 mm CPTCI 1H-
PULPROG       SpinEchopg30gp.prd
TD            65536
SOLVENT       CDCl3
NS            391
DS            16
SWH           30303.031 Hz
FIDRES        0.462388 Hz
AQ            1.0813940 sec
RG            3251
DW            16.500 usec
DE            6.00 usec
TE            298.0 K
D1            0.25000000 sec
d11           0.03000000 sec
d16           0.00020000 sec
d17           0.00019600 sec
MCREST        0.00000000 sec
MCMRK         0.01500000 sec
P2            33.10 usec

===== CHANNEL f1 =====
NUC1          13c
P1            16.55 usec
P11           500.00 usec
P12           2000.00 usec
PL0           120.00 dB
PL1           -1.00 dB
SFO1          125.7942548 MHz
SF1           2.70 dB
SF2           2.70 dB
SFOFF1        Crp60,0.5,20.1
SFOFF2        Crp60comp,4
SPOFF1        0.00 Hz
SPOFF2        0.00 Hz

===== CHANNEL f2 =====
CPDPRG2       waltz16
NUC2          1H
PCPD2         100.00 usec
PL2           1.60 dB
PL12          24.50 dB
SFO2          500.2225011 MHz

===== GRADIENT CHANNEL =====
GENAM1        SINE.100
GENAM2        SINE.100
GFX1          0.00 %
GFX2          0.00 %
GPF1          0.00 %
GPF2          0.00 %
GPF3          30.00 %
GPF4          50.00 %
p15           500.00 usec
p16           1000.00 usec

F2 - Processing parameters
SI            65536
SF            125.7804090 MHz
WDW           EM
SSB           0
LB            1.00 Hz
GB            0
PC            2.00

ID NMR plot parameters
CX            22.80 cm
CY            35.00 cm
F1P           230.637 ppm
F1            29009.68 Hz
F2P           -10.287 ppm
F2            -1293.96 Hz
PFMCM         10.56688 ppm/cm
HZCM          1329.10693 Hz/cm
    
```

ppm

200

150

100

50

0

19F spectrum with 1H decoupling

ppm

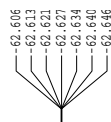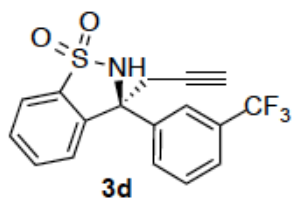

```

Current Data Parameters
USER      osborn
NAME      CAO-III-75B-SI
EXPNO     7
PROCNO    1

F2 - Acquisition Parameters
Date_     20150526
Time      20.53
INSTRUM   drx400
PROBHD    5 mm QNP H/P/P
PULPROG   zgfhigsn30
TD         65536
SOLVENT   CDCl3
NS         31
DS         4
SWH        75187.969 Hz
FIDRES     1.147277 Hz
AQ         0.4358644 sec
RG         3649.1
DW         6.650 usec
DE         9.46 usec
TE         298.0 K
D1         2.0000000 sec
d11        0.0300000 sec
d12        0.0002000 sec

===== CHANNEL f1 =====
NUC1       19F
P1         22.50 usec
PL1        -6.00 dB
SF01       376.4646491 MHz

===== CHANNEL f2 =====
CPDPRG2    waltz16
NUC2       1H
PCPD2      90.00 usec
PL2        120.00 dB
PL12       17.70 dB
SFO2       400.1320007 MHz

F2 - Processing parameters
SI         65536
SF         376.4983852 MHz
WDW        EM
SSB        0
LB         0.30 Hz
GB         0
PC         1.00

1D NMR plot parameters
CX         22.80 cm
CY         15.00 cm
F1P        1.000 ppm
F1         376.50 Hz
F2P        -190.000 ppm
F2         -71534.70 Hz
PFMCM      8.37719 ppm/cm
HZCM       3153.99976 Hz/cm
    
```

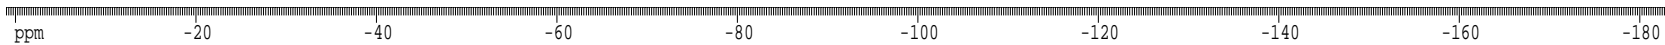

<sup>1</sup>H spectrum

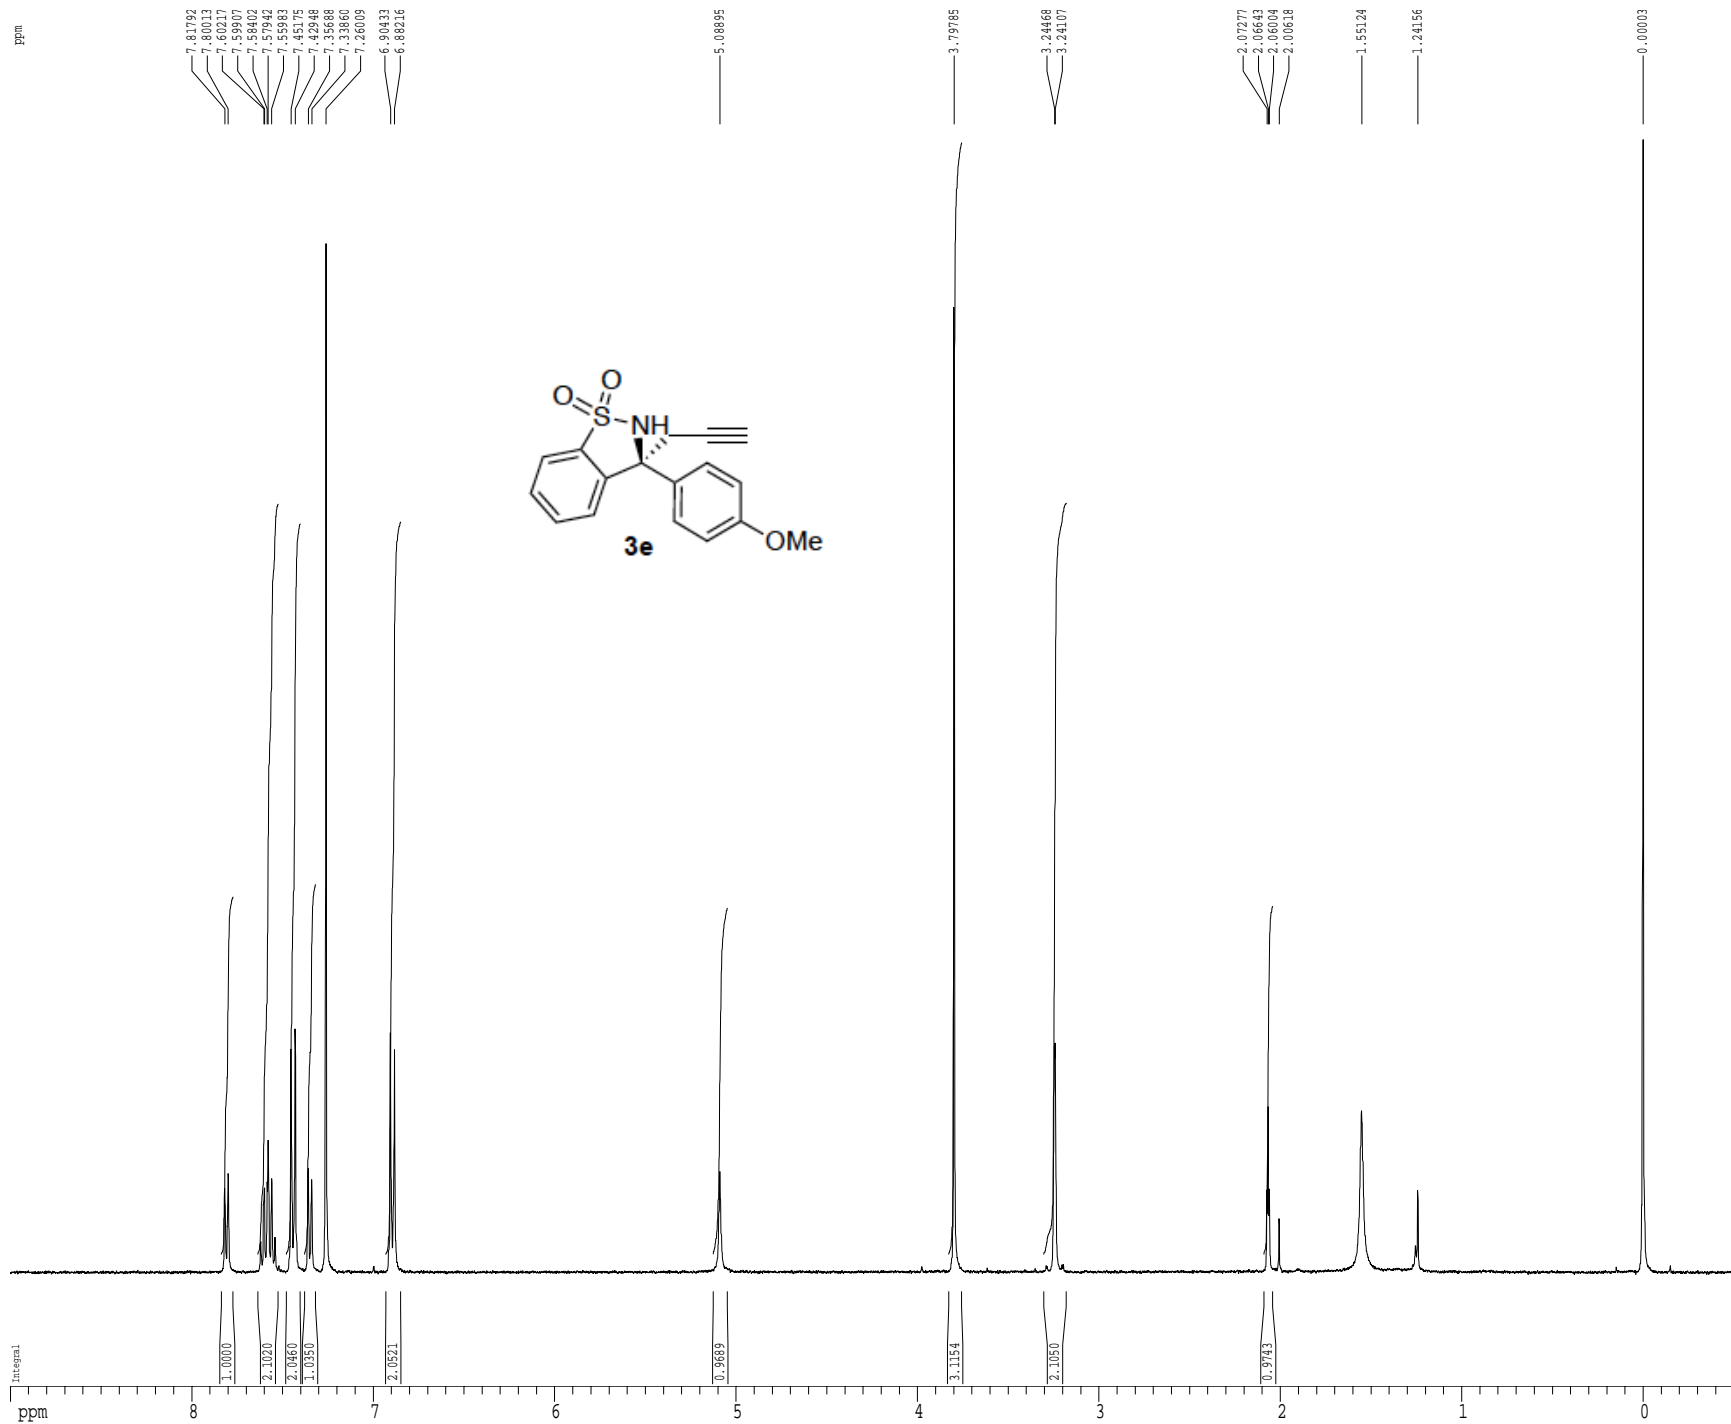

Current Data Parameters  
 USER endean  
 NAME TBDE-I-198-NH  
 EXPNO 1  
 PROCNO 1

F2 - Acquisition Parameters  
 Date\_ 20150717  
 Time 14.54  
 INSTRUM drx400  
 PROBHD 5 mm QNP H/P/P  
 PULPROG zg30  
 TD 65536  
 SOLVENT CDCl3  
 NS 8  
 DS 2  
 SWH 6410.256 Hz  
 FIDRES 0.097813 Hz  
 AQ 5.1118579 sec  
 RG 1024  
 DW 78.000 usec  
 DE 4.50 usec  
 TE 298.0 K  
 D1 0.10000000 sec  
 MCREST 0.00000000 sec  
 MCWREK 0.01500000 sec

===== CHANNEL f1 =====  
 NUC1 1H  
 P1 12.00 usec  
 PL1 0.00 dB  
 SF01 400.1328009 MHz

F2 - Processing parameters  
 SI 65536  
 SF 400.1300217 MHz  
 WDW EM  
 SSB 0  
 LB 0.30 Hz  
 GB 0  
 PC 2.00

1D NMR plot parameters  
 CX 22.80 cm  
 CY 15.00 cm  
 F1P 9.000 ppm  
 F1 3601.17 Hz  
 F2P -0.500 ppm  
 F2 -200.06 Hz  
 PPMCM 0.41667 ppm/cm  
 HZCM 166.72086 Hz/cm

Z-restored spin-echo 13C spectrum with 1H decoupling

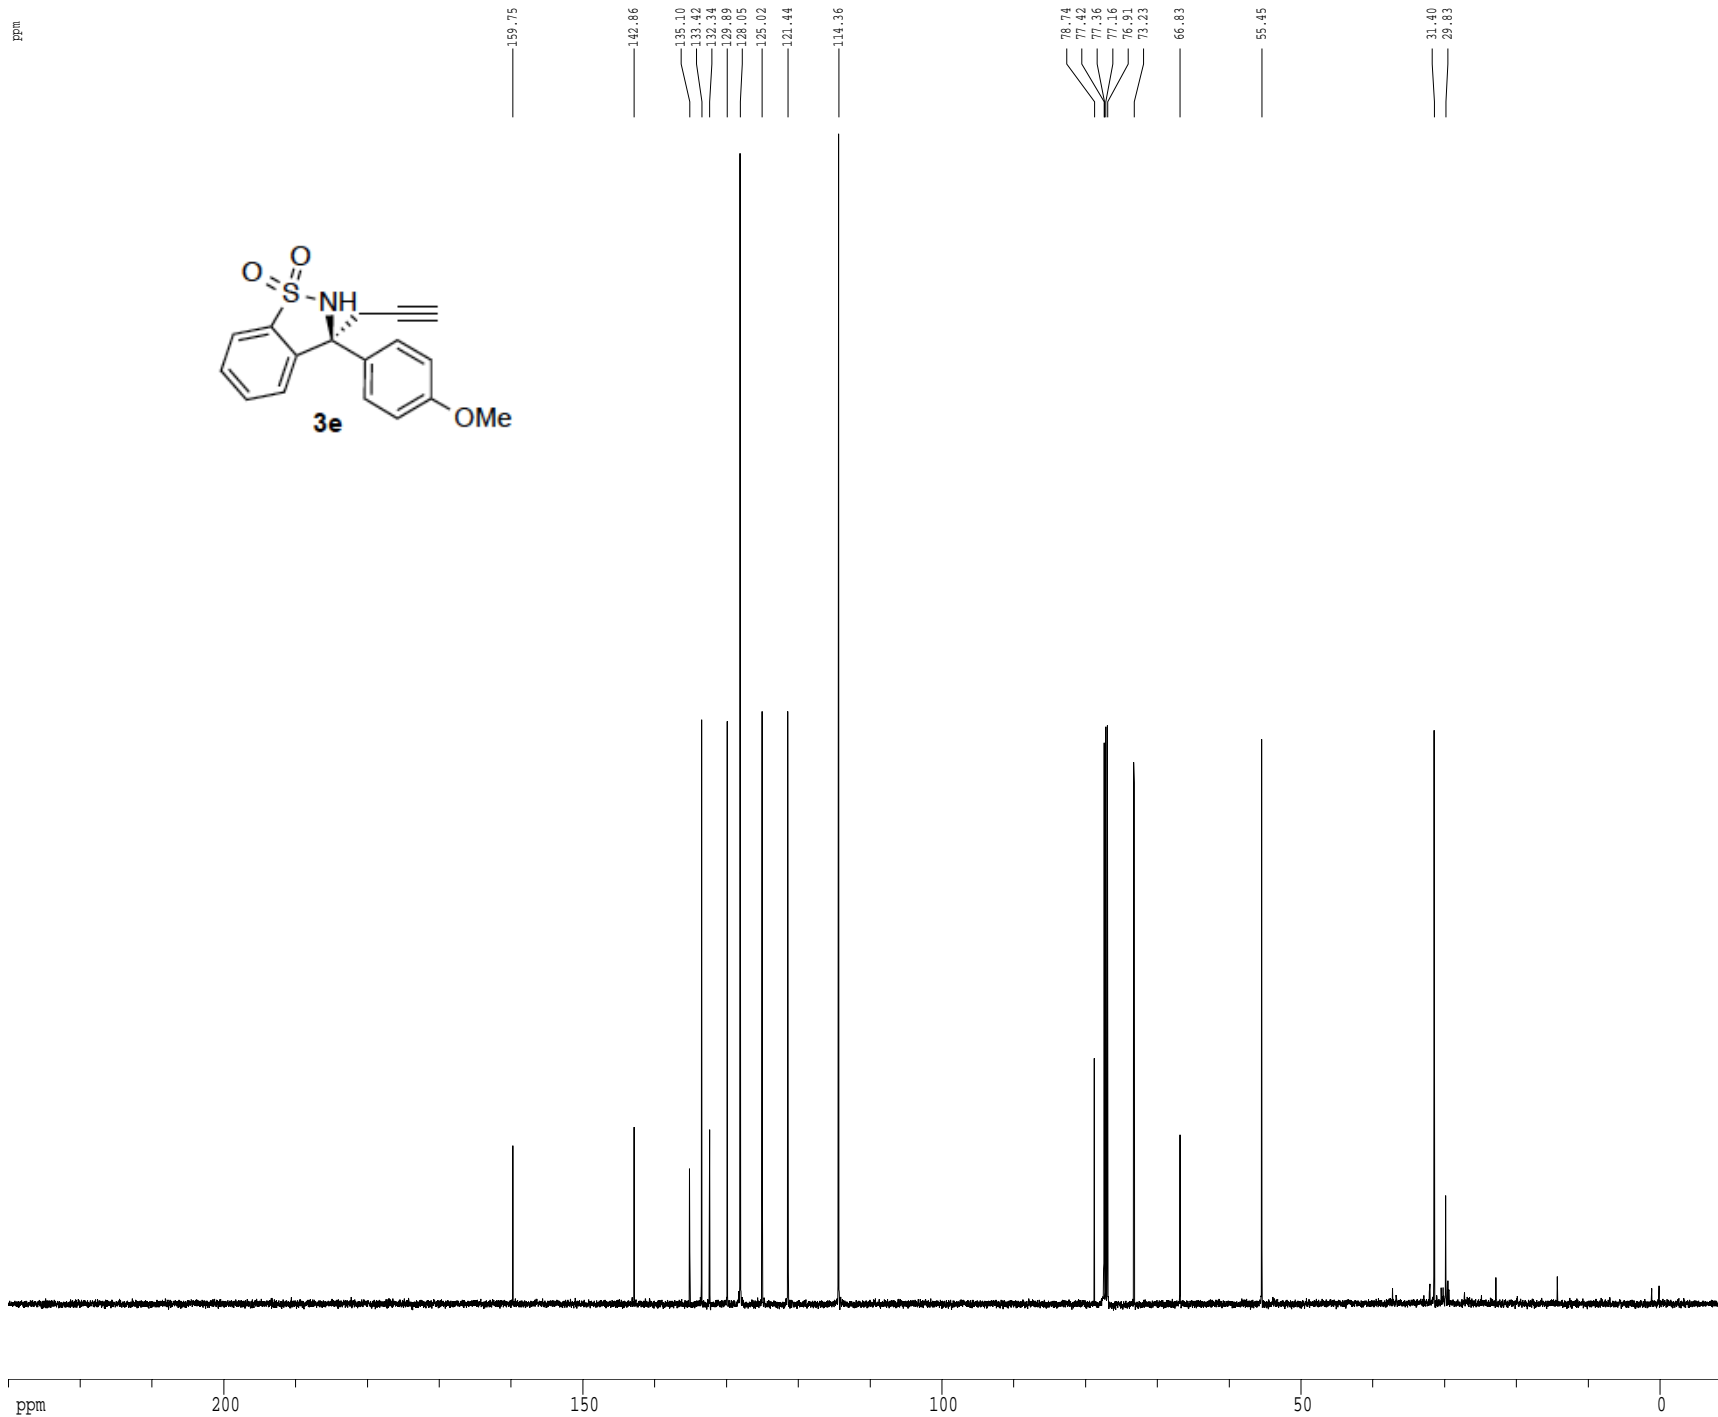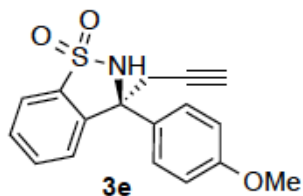

```

Current Data Parameters
USER          endean
NAME         TBDE-1-119-prop-pure-char
EXPNO        2
PROCNO       1

F2 - Acquisition Parameters
Date_        20141123
Time         20.40
INSTRUM      cryo500
PROBHD       5 mm CPY11 1H-
PULPROG      SpinEcho30pp.prd
TD           65536
SOLVENT      CDCl3
NS           1024
DS           16
SMH          30303.031 Hz
FIDRES       0.462388 Hz
AQ           1.0813940 sec
RG           8132
DW           16.500 usec
DE           6.00 usec
TE           298.0 K
D1           0.25000000 sec
d11          0.03000000 sec
D16          0.00020000 sec
d17          0.00019600 sec
MCREST       0.00000000 sec
MWRK        0.01500000 sec
P2           33.10 usec

***** CHANNEL f1 *****
NUC1          13C
P1            16.55 usec
P11           500.00 usec
P12           2000.00 usec
PL0           120.00 dB
PL1           -1.00 dB
SFO1         125.7842548 MHz
SP1           2.70 dB
SP2           2.70 dB
SFO2         Crp60.0.4.20.1
SFO3         Crp60comp.4
SPOFF1        0.00 Hz
SPOFF2        0.00 Hz

***** CHANNEL f2 *****
CPDPRG2       waltz16
NUC2          1H
PCPD2         100.00 usec
PL2           1.60 dB
PL12          24.50 dB
SFO2         500.2225011 MHz

***** GRADIENT CHANNEL *****
GPRAM1        SINE.100
GPRAM2        SINE.100
GFX1          0.00 %
GFX2          0.00 %
GFX3          0.00 %
GFX4          0.00 %
GFX5          30.00 %
GFX6          50.00 %
p15           500.00 usec
p16           1000.00 usec

F2 - Processing parameters
SI            65536
SF            125.7804122 MHz
WDW           EM
SSB           0
LB            1.00 Hz
GB            0
PC            2.00

1D NMR plot parameters
CX            22.80 cm
CY            15.65 cm
FIP           230.000 ppm
F1            28929.49 Hz
F2P          -10.000 ppm
F2            -1257.80 Hz
FPPMCM       10.52632 ppm/cm
HEM          1324.00439 Hz/cm
    
```

<sup>1</sup>H spectrum

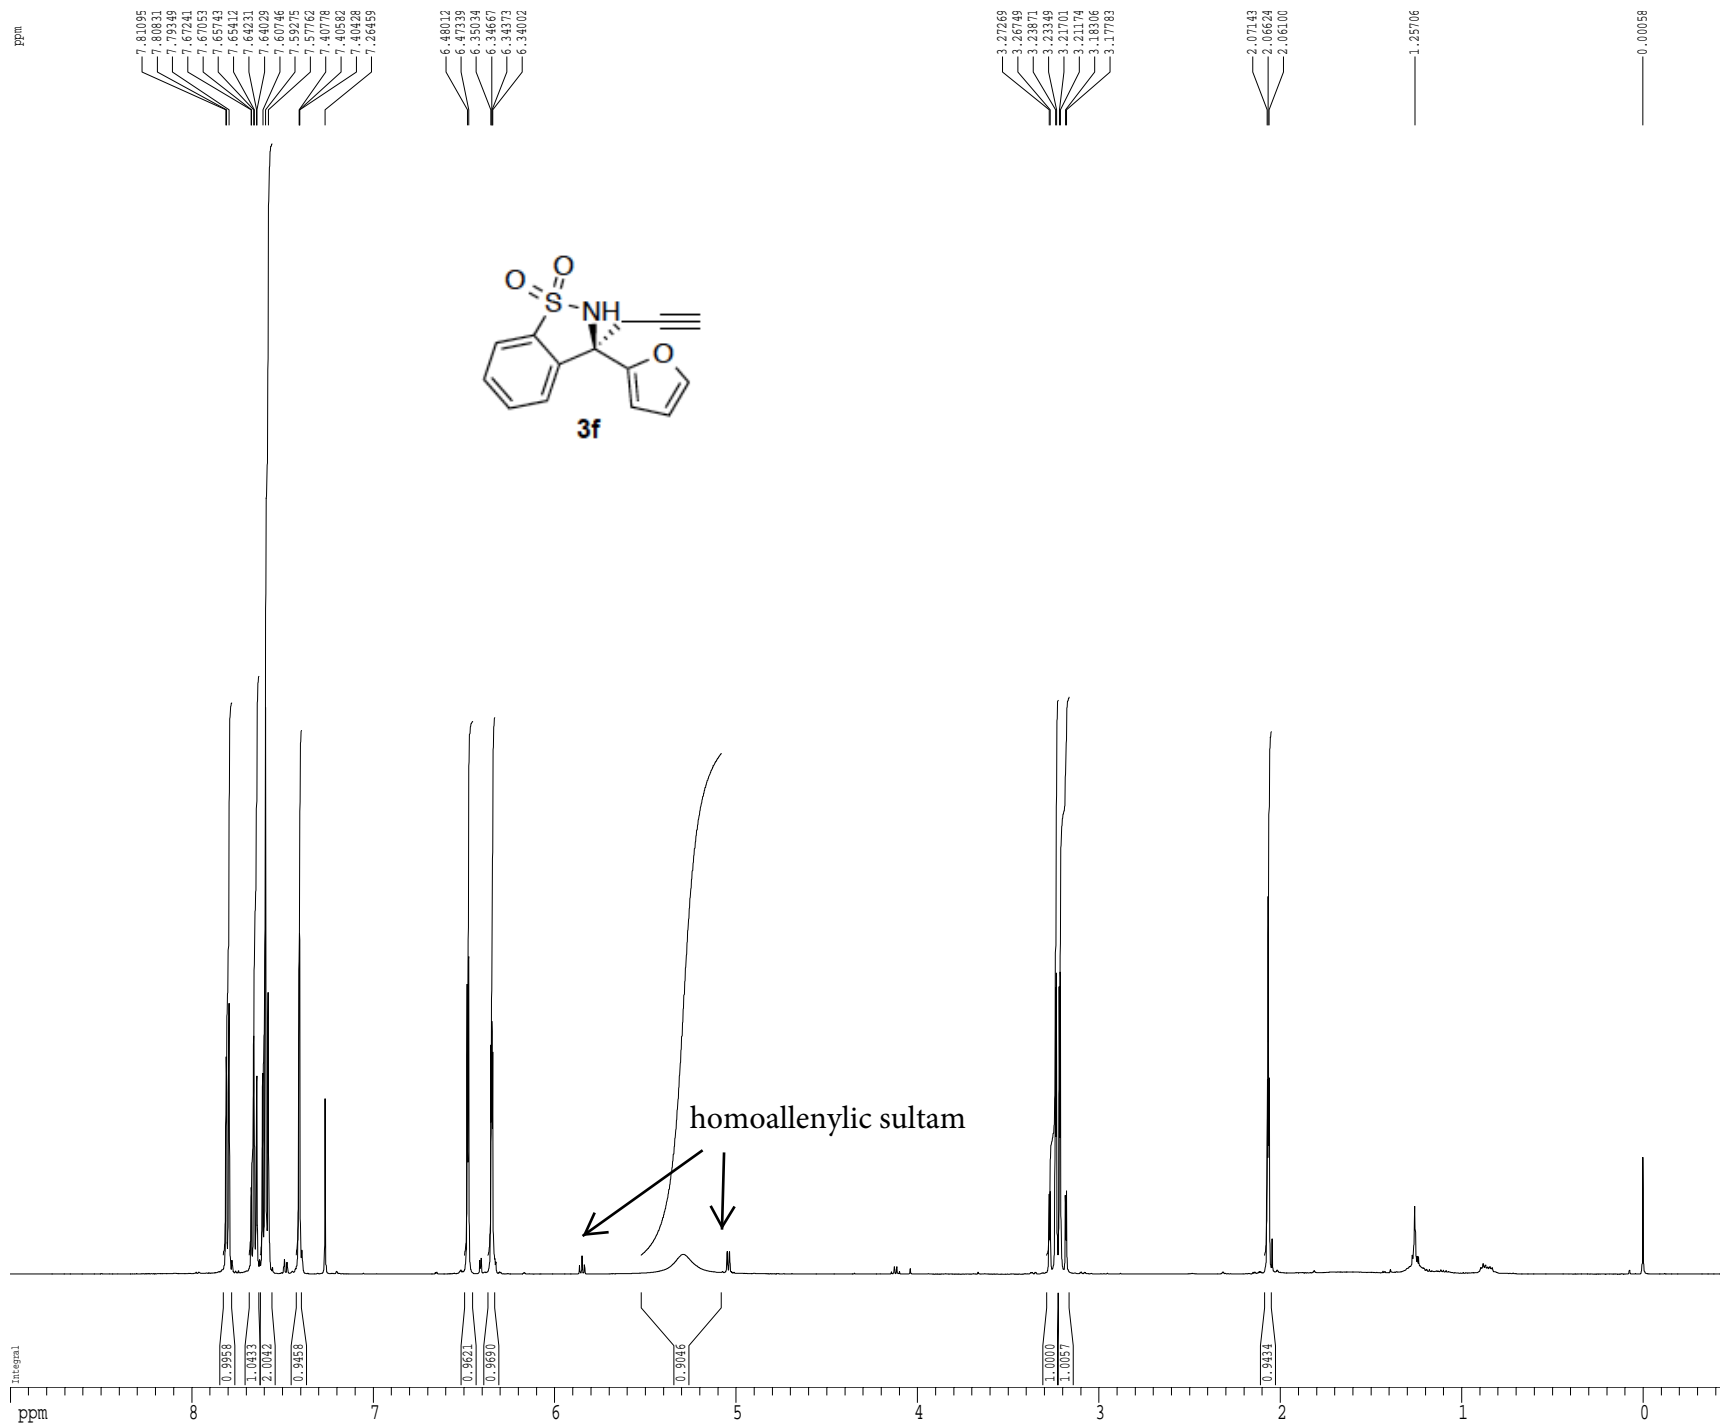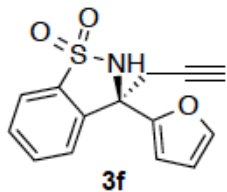

Current Data Parameters  
 USER osborn  
 NAME CAO-III-92-SI  
 EXPNO 1  
 PROCNO 1

F2 - Acquisition Parameters  
 Date\_ 20150331  
 Time 15.47  
 INSTRUM cryo500  
 PROBHD 5 mm CPTCI 1H-  
 PULPROG zg30  
 TD 81728  
 SOLVENT CDCl3  
 NS 8  
 DS 2  
 SWH 8012.820 Hz  
 FIDRES 0.098043 Hz  
 AQ 5.0998774 sec  
 RG 5  
 DW 62.400 usec  
 DE 6.00 usec  
 TE 298.0 K  
 DL 0.10000000 sec  
 MCREST 0.00000000 sec  
 MCWRR 0.01500000 sec

===== CHANNEL f1 =====  
 NUC1 1H  
 P1 7.50 usec  
 PL1 1.60 dB  
 SF01 500.2235015 MHz

F2 - Processing parameters  
 SI 65536  
 SF 500.2200287 MHz  
 WDW EM  
 SSB 0  
 LB 0.30 Hz  
 GB 0  
 PC 4.00

1D NMR plot parameters  
 CX 22.80 cm  
 CY 7.50 cm  
 F1P 9.000 ppm  
 F1 4501.98 Hz  
 F2P -0.500 ppm  
 F2 -250.11 Hz  
 PPMCM 0.41667 ppm/cm  
 HZCM 208.42502 Hz/cm



Z-restored spin-echo 13C spectrum with 1H decoupling

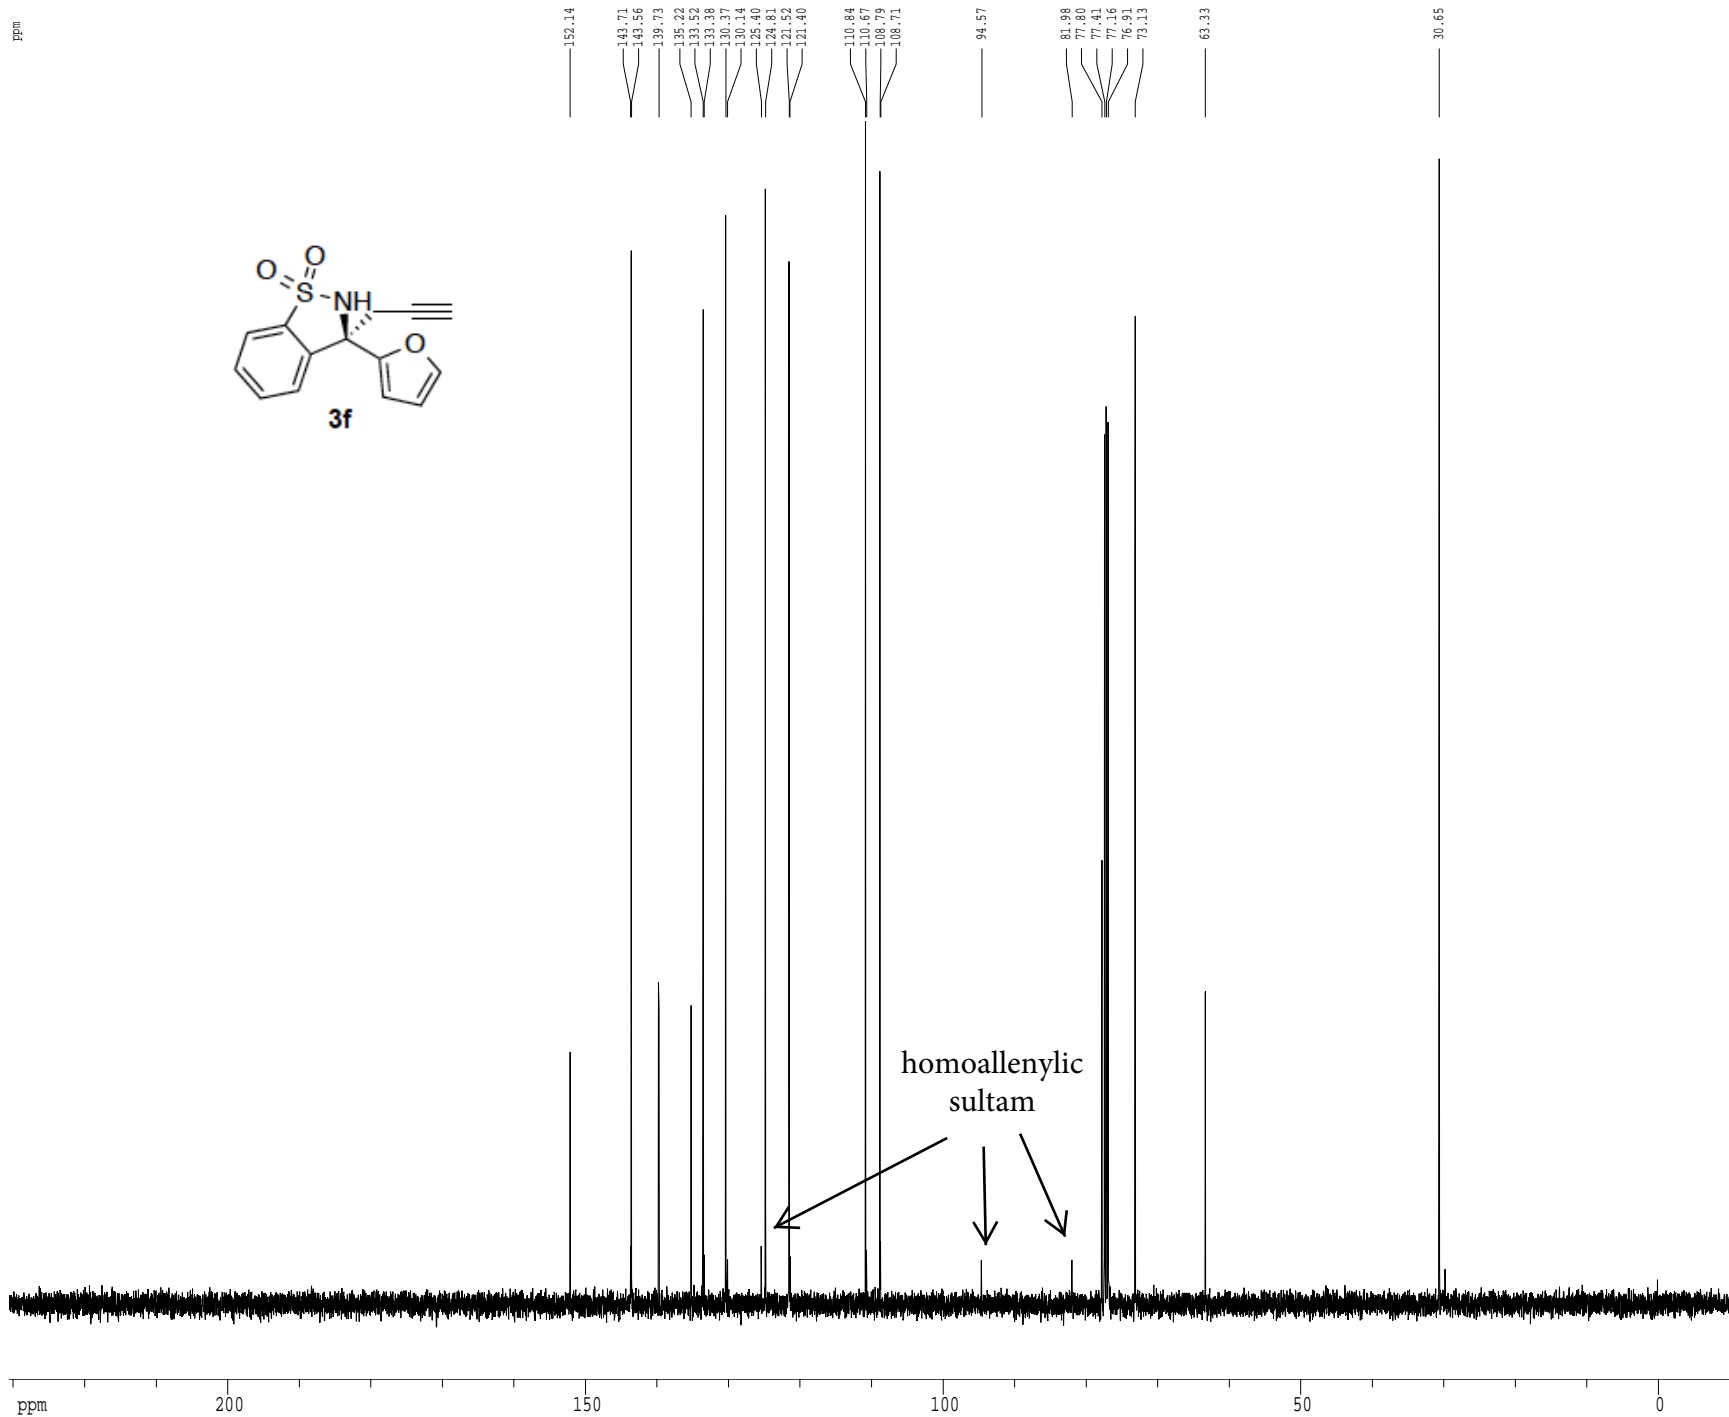

```

Current Data Parameters
USER      osborn
NAME      CAO-III-92-SI
EXPNO     2
PROCNO    1

F2 - Acquisition Parameters
Date_     20150331
Time      15.49
INSTRUM   cryo500
PROBHD    5 mm CPTCI 1H-
PULPROG   SpinEchopg30gp.prd
TD         65536
SOLVENT   CDCl3
NS         80
DS         16
SWH        30303.031 Hz
FIDRES     0.462388 Hz
AQ         1.0813940 sec
RG         5792.6
DW         16.500 usec
DE         6.00 usec
TE         298.0 K
D1         0.25000000 sec
d11        0.03000000 sec
D16        0.00020000 sec
d17        0.00019600 sec
MCREST     0.00000000 sec
MCONKX     0.01500000 sec
P2         33.10 usec

===== CHANNEL f1 =====
NUC1       13C
P1         16.55 usec
P11        500.00 usec
P12        2000.00 usec
PL0        120.00 dB
PL1        -1.00 dB
SFO1       125.7942548 MHz
SF1        2.70 dB
SF2        2.70 dB
SFO1M1     Crp60,0.5,20.1
SFO1M2     Crp60comp,4
SFOFF1     0.00 Hz
SFOFF2     0.00 Hz

===== CHANNEL f2 =====
CPDPRG2    waltz16
NUC2       1H
PCPD2     100.00 usec
PL2       1.60 dB
PL12      24.50 dB
SFO2      500.2225011 MHz

===== GRADIENT CHANNEL =====
GENAM1     SINE.100
GENAM2     SINE.100
GFX1       0.00 %
GFX2       0.00 %
GPY1       0.00 %
GPY2       0.00 %
GPZ1       30.00 %
GPZ2       50.00 %
p15        500.00 usec
p16        1000.00 usec

F2 - Processing parameters
SI         65536
SF         125.7804122 MHz
WDW        EM
SSB        0
LB         1.00 Hz
GB         0
PC         2.00

ID NMR plot parameters
CX         22.80 cm
CY         15.65 cm
F1         230.637 ppm
F2         29009.68 Hz
F2P        -10.287 ppm
F2         -1293.96 Hz
PFMCM      10.56688 ppm/cm
HZCM       1329.10693 Hz/cm
    
```

<sup>1</sup>H spectrum

7.83618  
7.80078  
7.79078  
7.75574  
7.75388  
7.74427  
7.74189  
7.72714  
7.68235  
7.68022  
7.66728  
7.65509  
7.65223  
7.65002  
7.62402  
7.62190  
7.60687  
7.60107  
7.59388  
7.59179  
7.58557  
7.45273  
7.37774  
7.36924  
7.35898  
7.34354  
7.33982  
7.32754  
7.32490  
7.31328  
7.31063  
7.26003

5.43639

3.37618  
3.37101  
3.34198  
3.33681  
3.31738  
3.31214  
3.28320  
3.27995  
2.94693  
2.87691

2.12564  
2.12048  
2.11527

1.60479

1.25663  
1.23831

0.00103

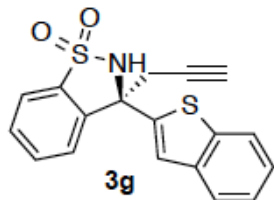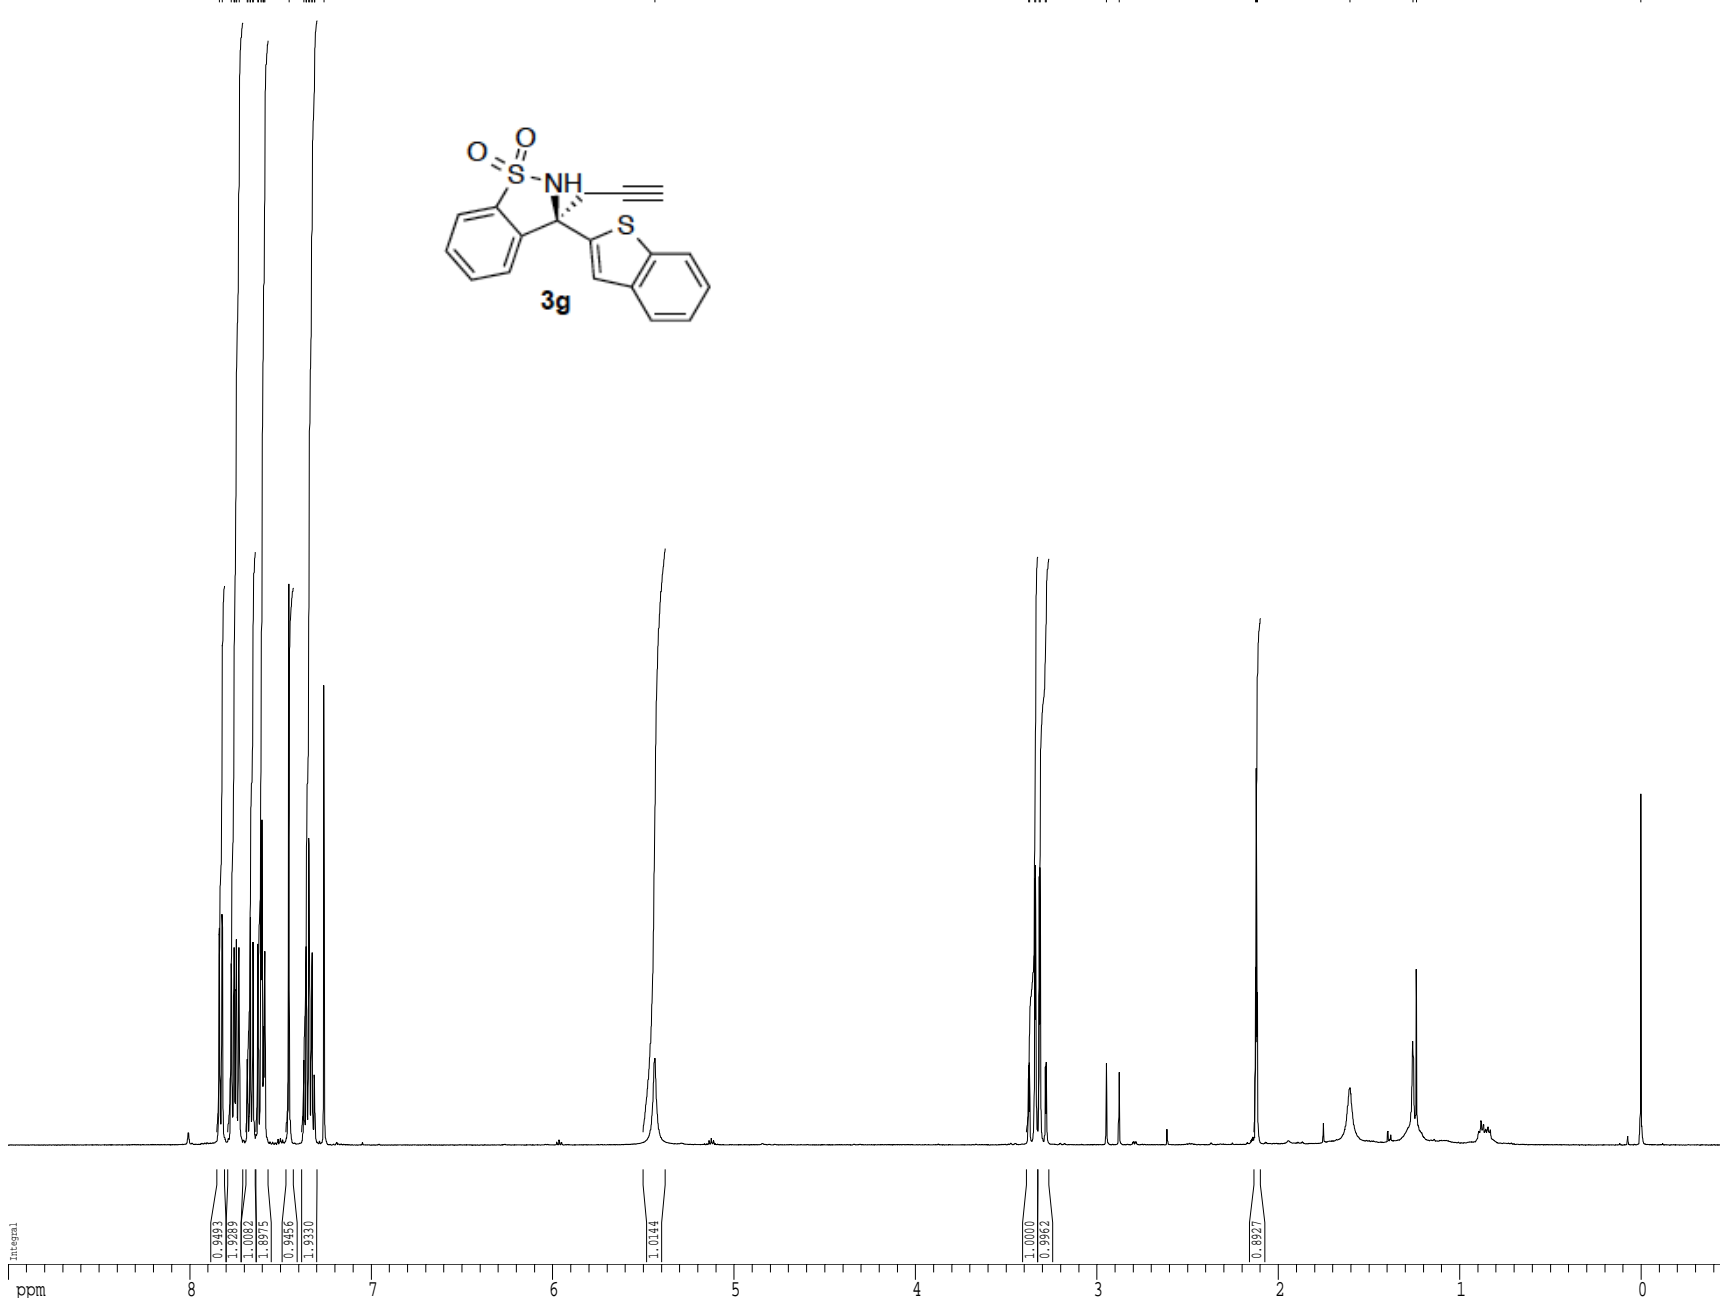

Current Data Parameters  
USER osborn  
NAME CAO-III-196-SI  
EXPNO 1  
PROCNO 1

F2 - Acquisition Parameters  
Date\_ 20150515  
Time 19.16  
INSTRUM cryo500  
PROBHD 5 mm CPTCI 1H-  
PULPROG zg30  
TD 81728  
SOLVENT CDCl3  
NS 8  
DS 2  
SWH 8012.820 Hz  
FIDRES 0.098043 Hz  
AQ 5.0998774 sec  
RG 3.6  
DW 62.400 usec  
DE 6.00 usec  
TE 298.0 K  
DL 0.10000000 sec  
MCREST 0.00000000 sec  
MCWRX 0.01500000 sec

===== CHANNEL f1 =====  
NUC1 1H  
P1 7.50 usec  
PL1 1.60 dB  
SF01 500.2235015 MHz

F2 - Processing parameters  
SI 65536  
SF 500.2200313 MHz  
WDW EM  
SSB 0  
LB 0.30 Hz  
GB 0  
PC 4.00

1D NMR plot parameters  
CX 22.80 cm  
CY 7.50 cm  
F1P 9.000 ppm  
F1 4501.98 Hz  
F2P -0.500 ppm  
F2 -250.11 Hz  
PPMCM 0.41667 ppm/cm  
HZCM 208.42502 Hz/cm

Z-restored spin-echo 13C spectrum with 1H decoupling

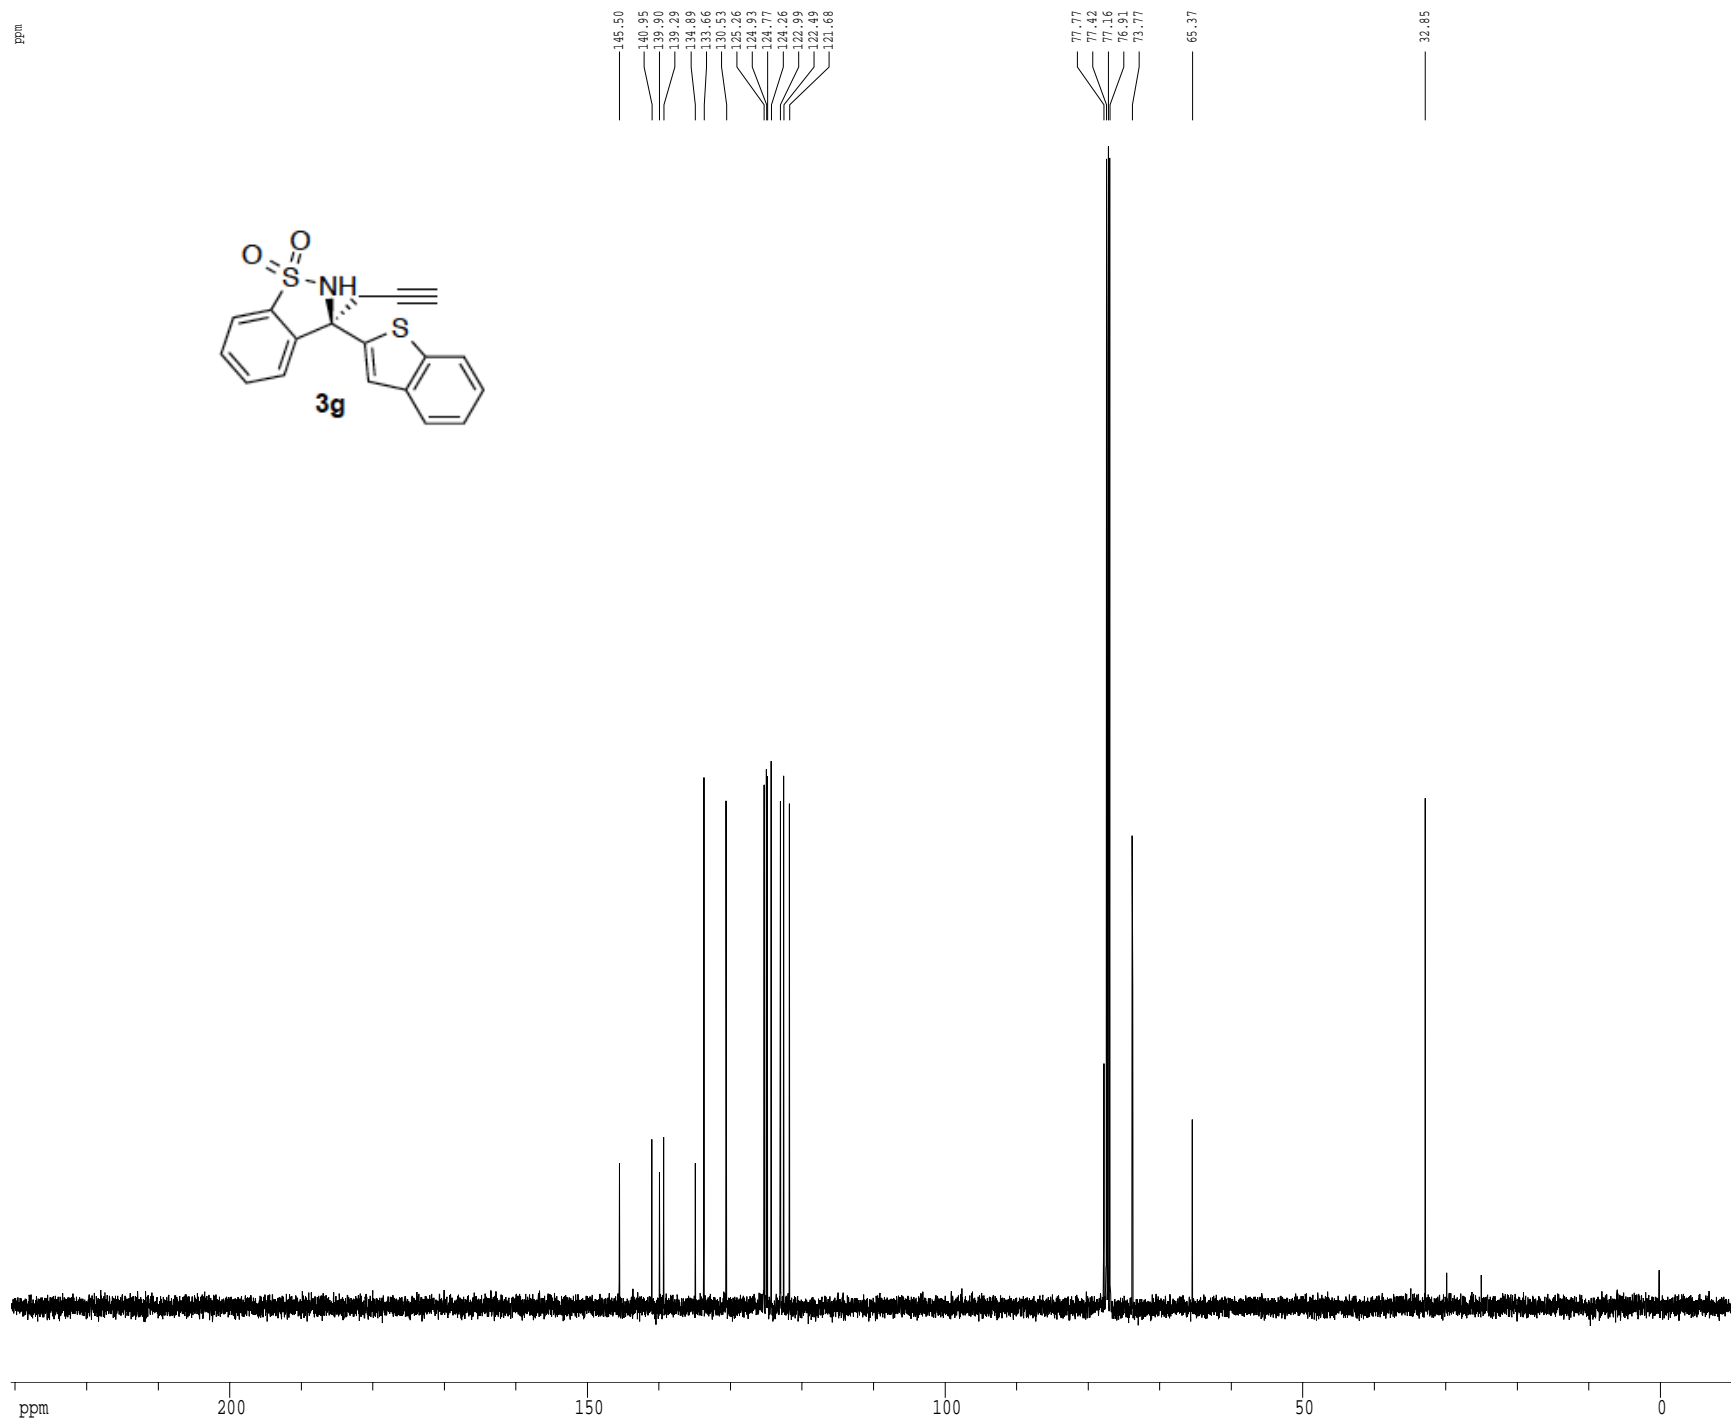

```

Current Data Parameters
USER      osborn
NAME      CAO-III-196-SI
EXPNO     2
PROCNO    1

F2 - Acquisition Parameters
Date_     20150515
Time      19.19
INSTRUM   cryo500
PROBHD    5 mm CPTCI 1H-
PULPROG   SpinEchopg30gp.prd
TD         65536
SOLVENT   CDCl3
NS         215
DS         16
SWH        30303.031 Hz
FIDRES     0.462388 Hz
AQ         1.0813940 sec
RG         7298.2
DW         16.500 usec
DE         6.00 usec
TE         298.0 K
D1         0.25000000 sec
d11        0.03000000 sec
d16        0.00020000 sec
d17        0.00019600 sec
MCREST     0.00000000 sec
MCMRXX     0.01500000 sec
P2         33.10 usec

===== CHANNEL f1 =====
NUC1       13c
P1         16.55 usec
P11        500.00 usec
P12        2000.00 usec
PL0        120.00 dB
PL1        -1.00 dB
SFO1       125.7942548 MHz
SF1        2.70 dB
SF2        2.70 dB
SFO1M1     Crp60,0.5,20.1
SFO1M2     Crp60comp,4
SFOFF1     0.00 Hz
SFOFF2     0.00 Hz

===== CHANNEL f2 =====
CPDPRG2    waltz16
NUC2       1H
PCPD2     100.00 usec
PL2        1.60 dB
PL12       24.50 dB
SFO2       500.2225011 MHz

===== GRADIENT CHANNEL =====
GENAM1     SINE.100
GENAM2     SINE.100
GFX1       0.00 %
GFX2       0.00 %
GPF1       0.00 %
GPF2       0.00 %
GPF3       0.00 %
GPF4       30.00 %
GPF5       50.00 %
p15        500.00 usec
p16        1000.00 usec

F2 - Processing parameters
SI         65536
SF         125.7804094 MHz
WDW        EM
SSB        0
LB         1.00 Hz
GB         0
PC         2.00

ID NMR plot parameters
CX         22.80 cm
CY         15.65 cm
F1P        230.637 ppm
F1         29009.68 Hz
F2P        -10.287 ppm
F2         -1293.96 Hz
PFMCM      10.56688 ppm/cm
HZCM       1329.10693 Hz/cm
    
```

<sup>1</sup>H spectrum

ppm  
 7.81154  
 7.79345  
 7.79205  
 7.67681  
 7.67385  
 7.65804  
 7.65498  
 7.63922  
 7.63601  
 7.61152  
 7.60867  
 7.52258  
 7.58983  
 7.57355  
 7.56075  
 7.53075  
 7.38425  
 7.30130  
 7.29148  
 7.28852  
 7.26227  
 7.18610  
 7.18313  
 7.17698  
 7.17400  
 6.98912  
 6.97995  
 6.97637  
 6.96719

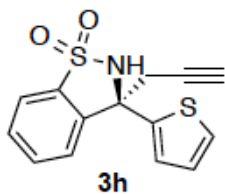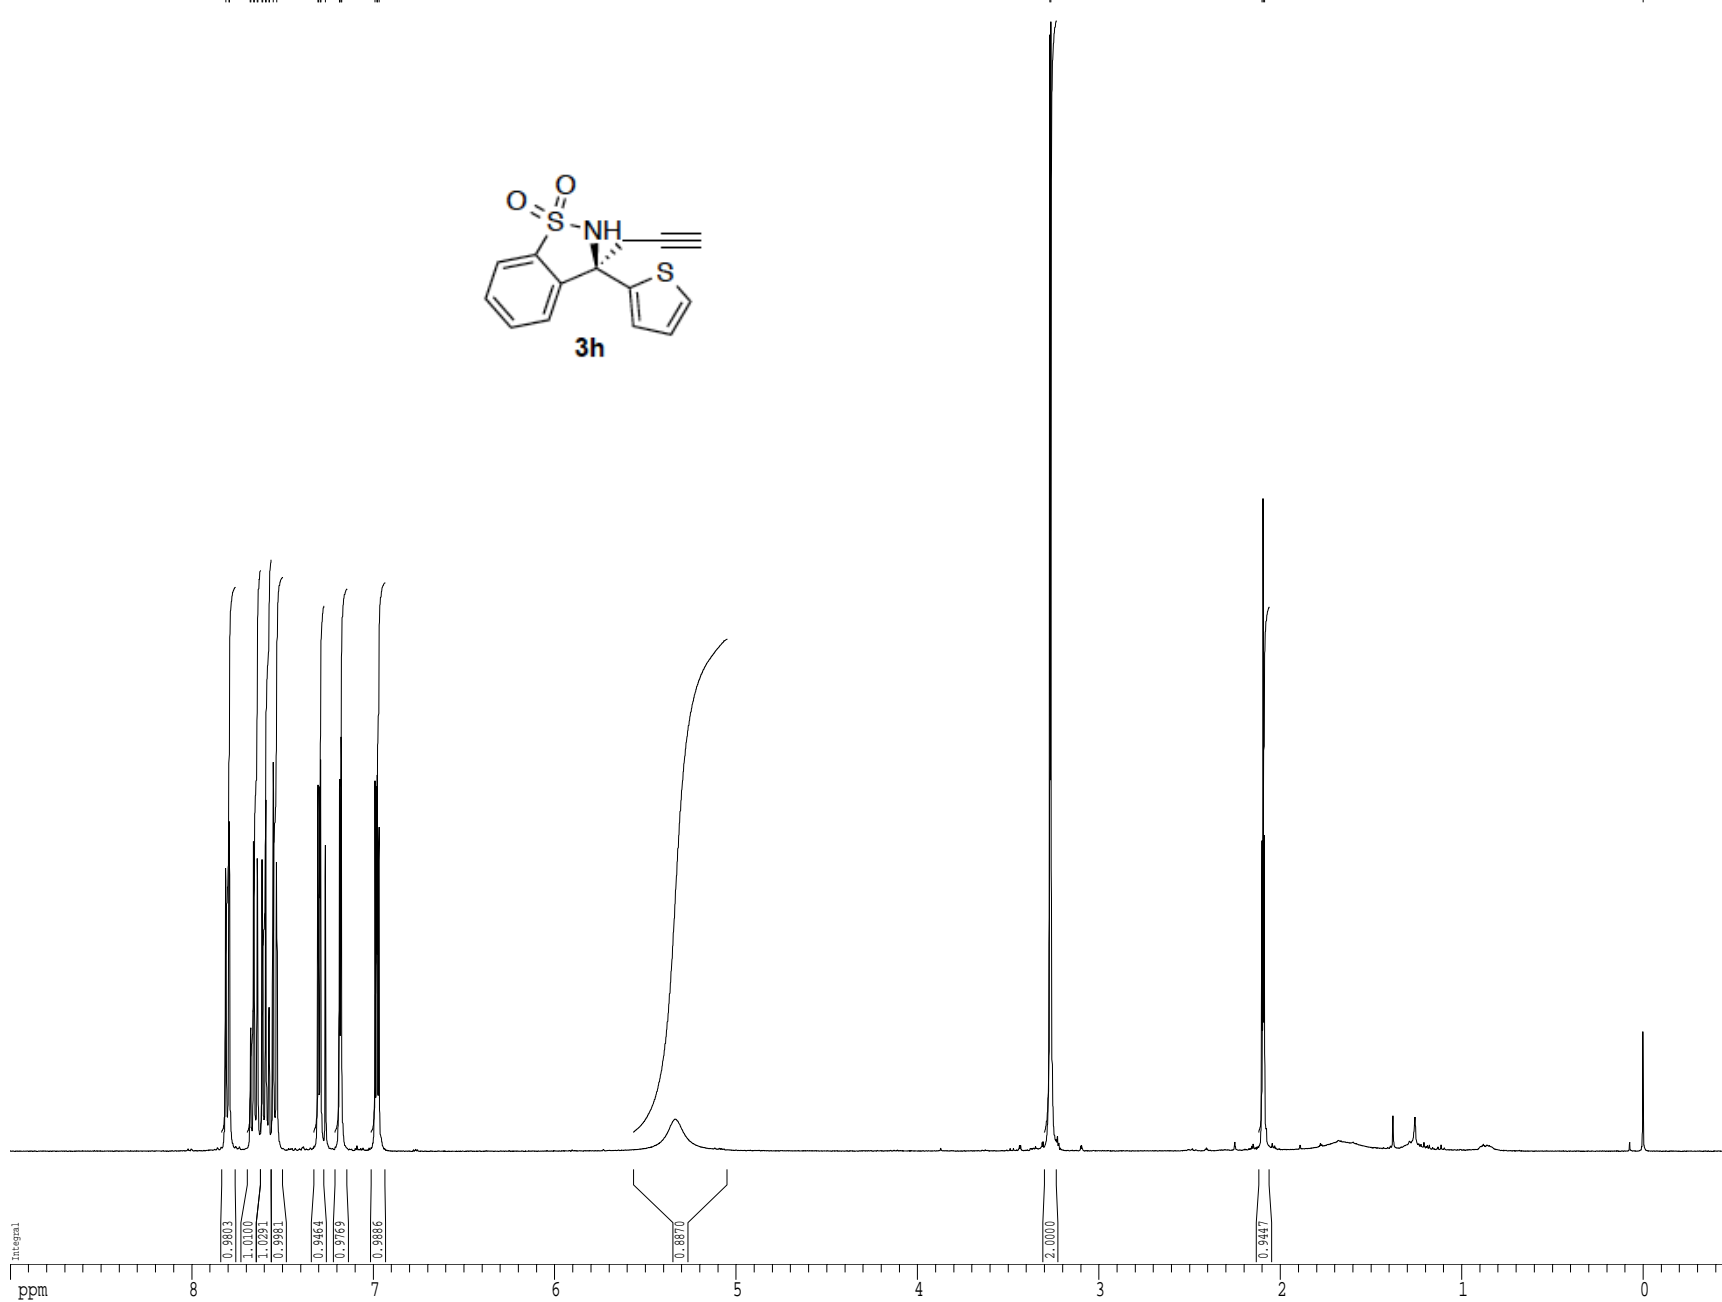

Current Data Parameters  
 USER osborn  
 NAME CAO-III-81B-SI  
 EXPNO 2  
 PROCNO 1

F2 - Acquisition Parameters  
 Date\_ 20150525  
 Time 18.04  
 INSTRUM drx400  
 PROBHD 5 mm QNP H/P/P  
 PULPROG zg30  
 TD 65536  
 SOLVENT CDCl3  
 NS 8  
 DS 2  
 SWH 6410.256 Hz  
 FIDRES 0.097813 Hz  
 AQ 5.1118579 sec  
 RG 228.1  
 DW 78.000 usec  
 DE 4.50 usec  
 TE 295.8 K  
 D1 0.10000000 sec  
 MCREST 0.00000000 sec  
 MCMRK 0.01500000 sec

===== CHANNEL f1 =====  
 NUC1 1H  
 F1 12.00 usec  
 PL1 0.00 dB  
 SF01 400.1328009 MHz

F2 - Processing parameters  
 SI 65536  
 SF 400.1300198 MHz  
 WDW EM  
 SSB 0  
 LB 0.30 Hz  
 GB 0  
 PC 2.00

1D NMR plot parameters  
 CX 22.80 cm  
 CY 15.00 cm  
 F1P 9.000 ppm  
 F1 3601.17 Hz  
 F2P -0.500 ppm  
 F2 -200.06 Hz  
 PPMCM 0.41667 ppm/cm  
 HZCM 166.72084 Hz/cm

Z-restored spin-echo 13C spectrum with 1H decoupling

ppm

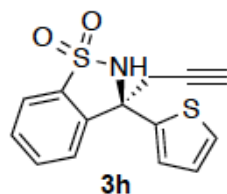

145.12  
141.57  
134.95  
133.57  
130.34  
127.40  
126.60  
126.16  
124.11  
121.51  
78.01  
77.41  
77.16  
76.90  
73.50  
65.03  
33.24

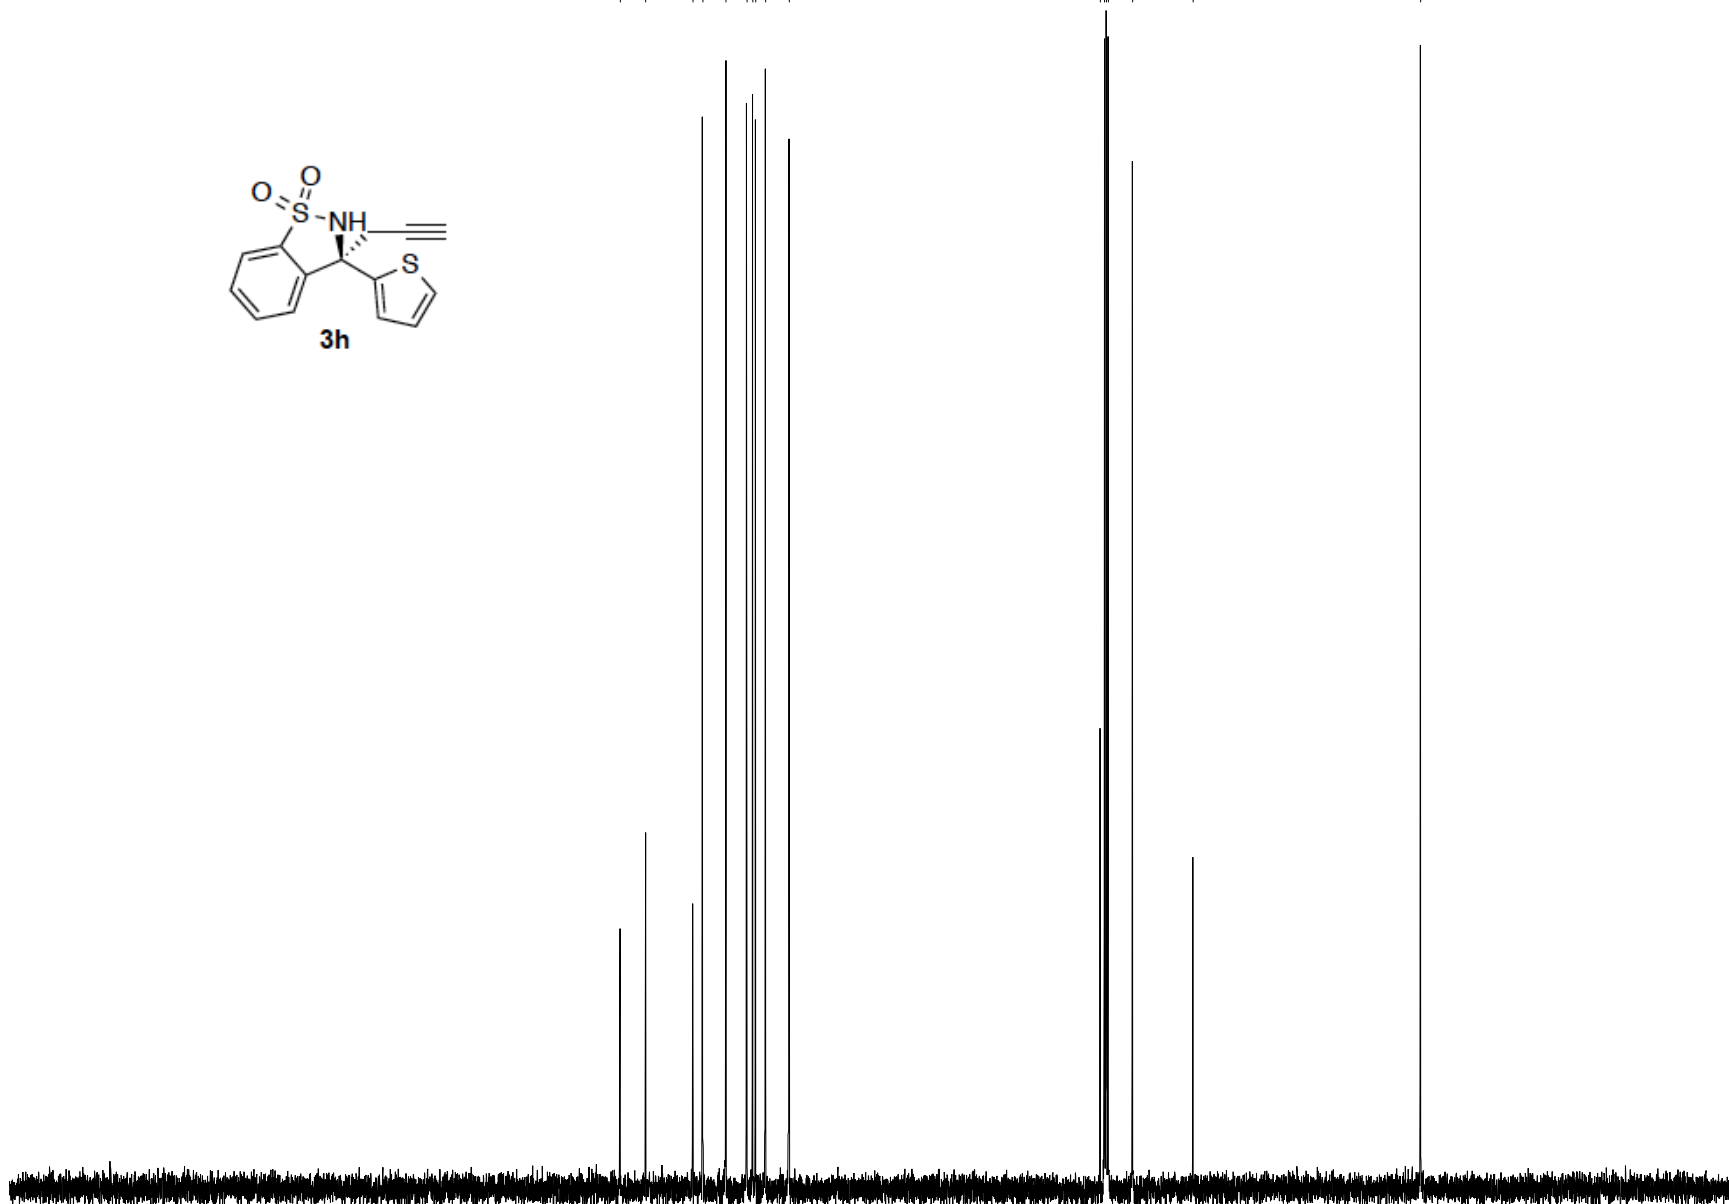

```

Current Data Parameters
USER      osborn
NAME      CAO-III-81B-SI
EXPNO     5
PROCNO    1

F2 - Acquisition Parameters
Date_     20150525
Time      18.52
INSTRUM   cryo500
PROBHD    5 mm CPTCI 1H-
PULPROG   SpinEchopg30gp.prd
TD         65536
SOLVENT   CDCl3
NS         251
DS         15
SWH        30303.031 Hz
FIDRES     0.462388 Hz
AQ         1.0813940 sec
RG         7298.2
DW         16.500 usec
DE         6.00 usec
TE         298.0 K
D1         0.25000000 sec
d11        0.03000000 sec
D16        0.00020000 sec
d17        0.00019600 sec
MCREST     0.00000000 sec
MCONK      0.01500000 sec
P2         33.10 usec

===== CHANNEL f1 =====
NUC1       13C
P1         16.55 usec
P11        500.00 usec
P12        2000.00 usec
PL0        120.00 dB
PL1        -1.00 dB
SFO1       125.7942548 MHz
SF1        2.70 dB
SF2        2.70 dB
SFO1M1     Crp60,0.5,20.1
SFO1M2     Crp60comp,4
SFOFF1     0.00 Hz
SFOFF2     0.00 Hz

===== CHANNEL f2 =====
CPDPRG2    waltz16
NUC2       1H
PCPD2      100.00 usec
PL2        1.60 dB
PL12       24.50 dB
SFO2       500.2225011 MHz

===== GRADIENT CHANNEL =====
GENAM1     SINE.100
GENAM2     SINE.100
GFX1       0.00 %
GFX2       0.00 %
GPF1       0.00 %
GPF2       0.00 %
GPF3       0.00 %
GPF4       30.00 %
GPF5       50.00 %
p15        500.00 usec
p16        1000.00 usec

F2 - Processing parameters
SI         65536
SF         125.7804127 MHz
WDW        EM
SSB        0
LB         1.00 Hz
GB         0
PC         2.00

ID NMR plot parameters
CX         22.80 cm
CY         15.65 cm
F1         230.637 ppm
F2         29009.68 Hz
F3         -10.287 ppm
F4         -1293.96 Hz
PFMCM      10.56688 ppm/cm
HZCM       1329.10693 Hz/cm
    
```

ppm 200 150 100 50 0

<sup>1</sup>H spectrum

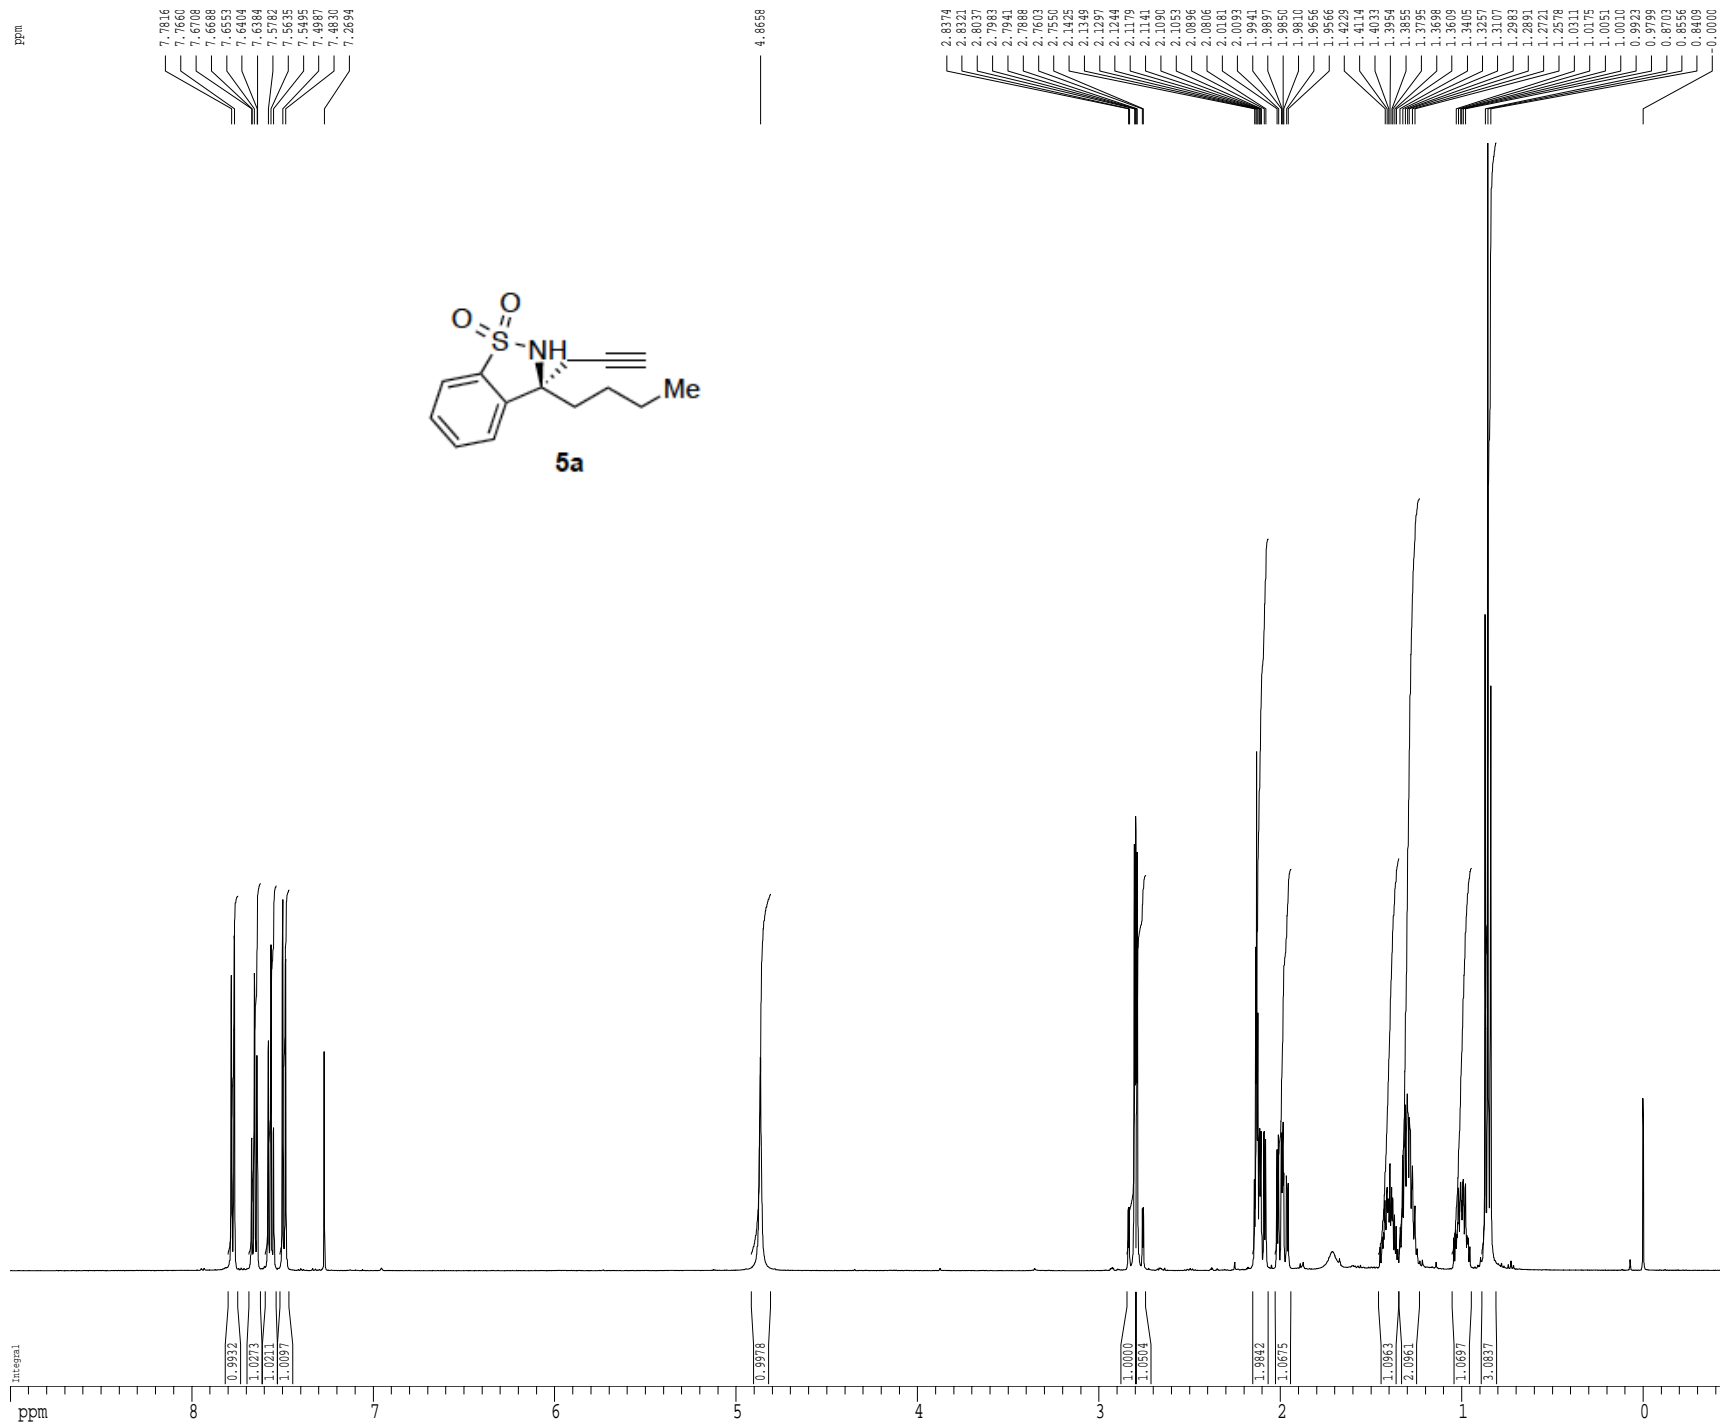

Current Data Parameters  
 USER osborn  
 NAME CAO-III-94B-SI  
 EXPNO 1  
 PROCNO 1

F2 - Acquisition Parameters  
 Date\_ 20150514  
 Time 17.55  
 INSTRUM cryo500  
 PROBHD 5 mm CPTCI 1H-  
 PULPROG zg30  
 TD 81728  
 SOLVENT CDCl3  
 NS 8  
 DS 2  
 SWH 8012.820 Hz  
 FIDRES 0.098043 Hz  
 AQ 5.0998774 sec  
 RG 3.2  
 DW 62.400 usec  
 DE 6.00 usec  
 TE 298.0 K  
 DL 0.10000000 sec  
 MCREST 0.00000000 sec  
 MCWEX 0.01500000 sec

===== CHANNEL f1 =====  
 NUC1 1H  
 P1 7.50 usec  
 PL1 1.60 dB  
 SF01 500.2235015 MHz

F2 - Processing parameters  
 SI 65536  
 SF 500.2200264 MHz  
 WDW EM  
 SSB 0  
 LB 0.30 Hz  
 GB 0  
 PC 4.00

1D NMR plot parameters  
 CX 22.80 cm  
 CY 15.00 cm  
 F1P 9.000 ppm  
 F1 4501.98 Hz  
 F2P -0.500 ppm  
 F2 -250.11 Hz  
 PPMCM 0.41667 ppm/cm  
 HZCM 208.42502 Hz/cm

Z-restored spin-echo 13C spectrum with 1H decoupling

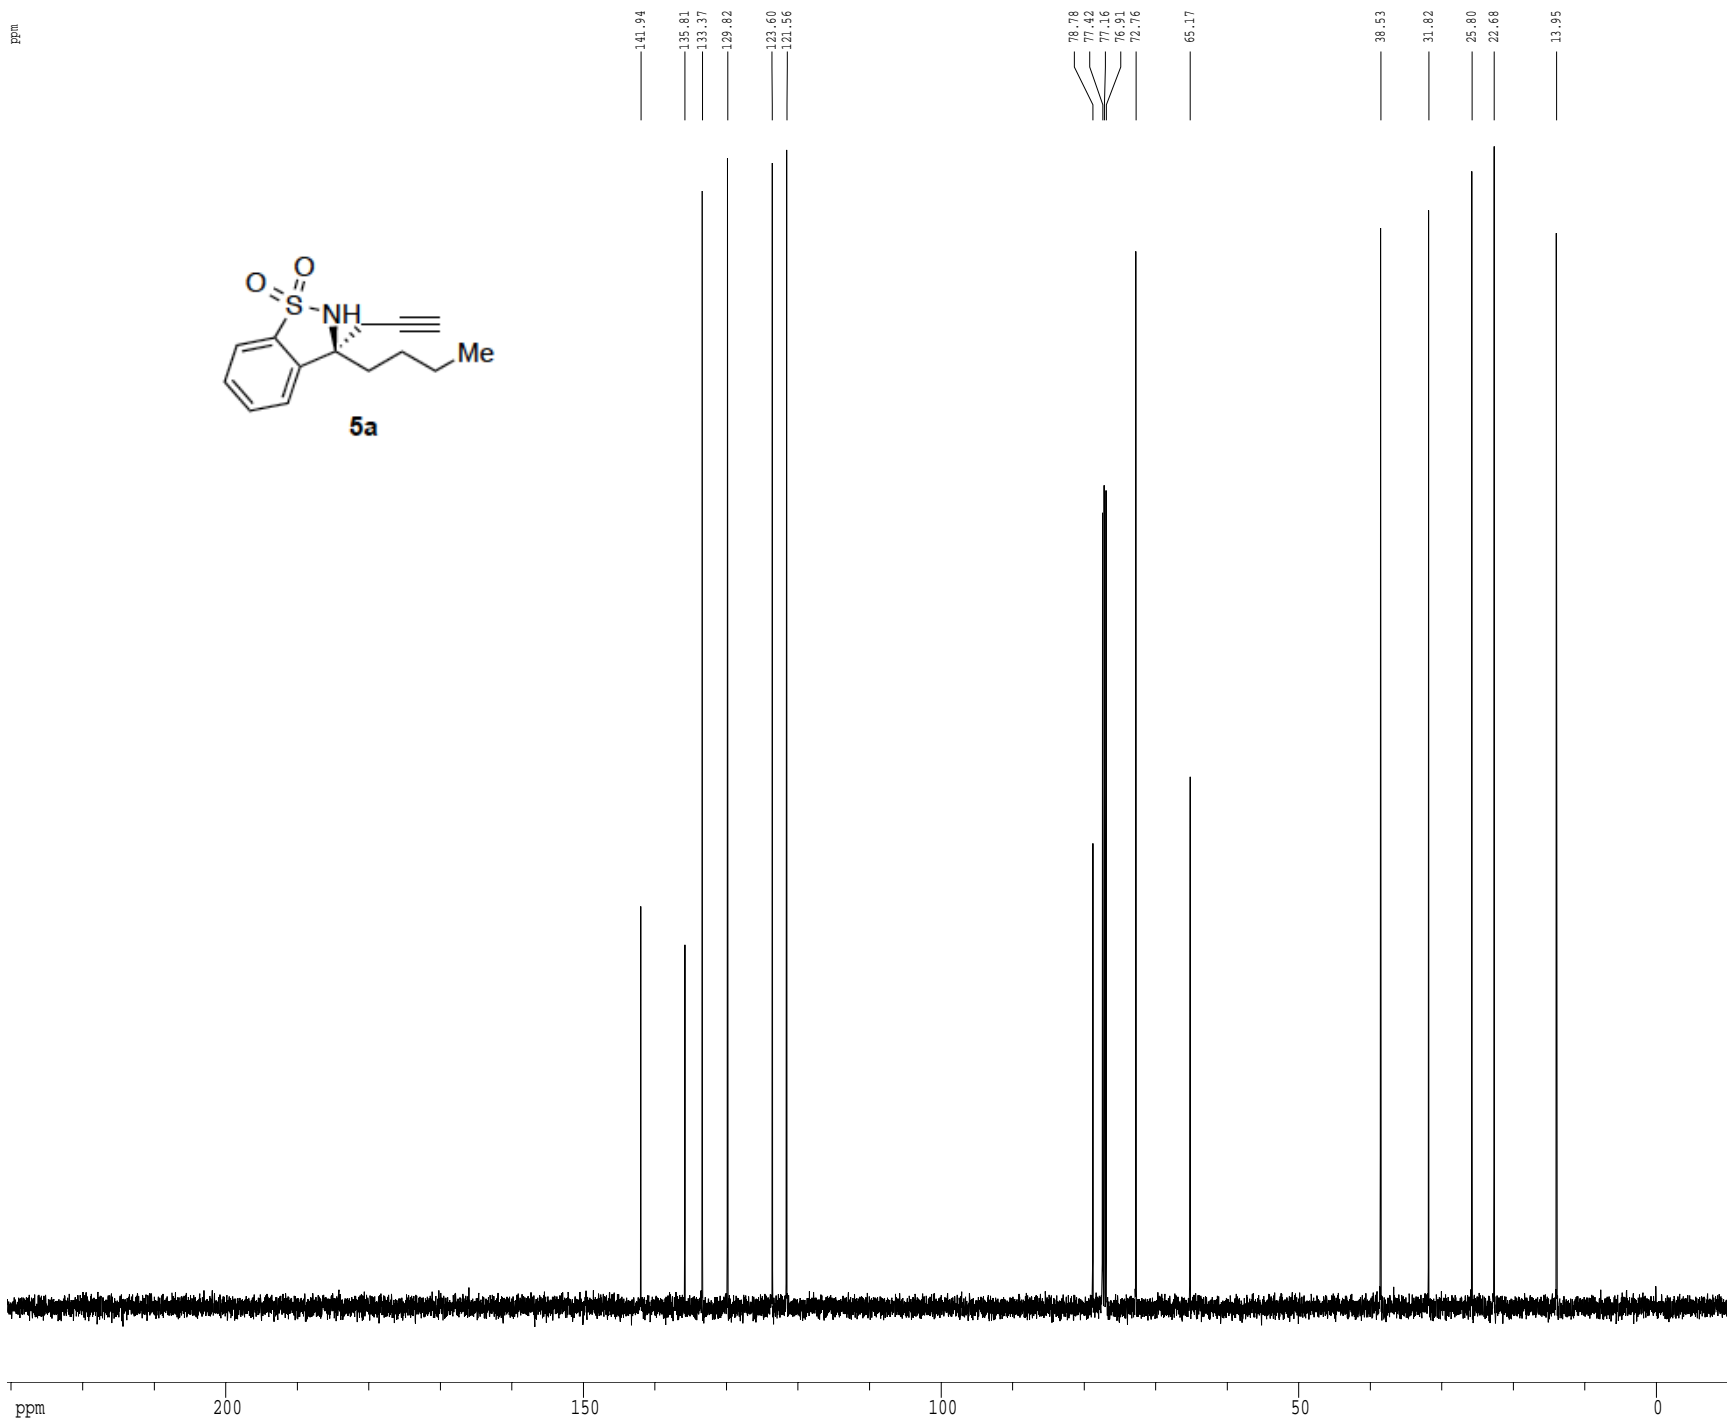

```

Current Data Parameters
USER      osborn
NAME      CAO-III-94B-SI
EXPNO     2
PROCNO    1

F2 - Acquisition Parameters
Date_     20150514
Time      17.57
INSTRUM   cryo500
PROBHD    5 mm CPTCI 1H-
PULPROG   SpinEchopg30gp.prd
TD         65536
SOLVENT   CDCl3
NS         136
DS         16
SWH        30303.031 Hz
FIDRES     0.462388 Hz
AQ         1.0813940 sec
RG         11585.2
DW         16.500 usec
DE         6.00 usec
TE         298.0 K
D1         0.25000000 sec
d11        0.03000000 sec
d16        0.00020000 sec
d17        0.00019600 sec
MCREST     0.00000000 sec
MCONRX     0.01500000 sec
P2         33.10 usec

===== CHANNEL f1 =====
NUC1       13C
P1         16.55 usec
P11        500.00 usec
P12        2000.00 usec
PL0        120.00 dB
PL1        -1.00 dB
SFO1       125.7942548 MHz
SF1        2.70 dB
SF2        2.70 dB
SFO1M1     Crp60,0.5,20.1
SFO1M2     Crp60comp,4
SFOFF1     0.00 Hz
SFOFF2     0.00 Hz

===== CHANNEL f2 =====
CPDPRG2    waltz16
NUC2       1H
PCPD2     100.00 usec
PL2       1.60 dB
PL12      24.50 dB
SFO2      500.2225011 MHz

===== GRADIENT CHANNEL =====
GENAM1     SINE.100
GENAM2     SINE.100
GFX1       0.00 %
GFX2       0.00 %
GPF1       0.00 %
GPF2       0.00 %
GPF3       0.00 %
GPF4       30.00 %
GPF5       50.00 %
p15        500.00 usec
p16        1000.00 usec

F2 - Processing parameters
SI         65536
SF         125.7804113 MHz
WDW        EM
SSB        0
LB         1.00 Hz
GB         0
PC         2.00

ID NMR plot parameters
CX         22.80 cm
CY         15.65 cm
F1P        230.637 ppm
F1         29009.68 Hz
F2P        -10.287 ppm
F2         -1293.96 Hz
PFMCM      10.56688 ppm/cm
HZCM       1329.10693 Hz/cm
    
```

<sup>1</sup>H spectrum

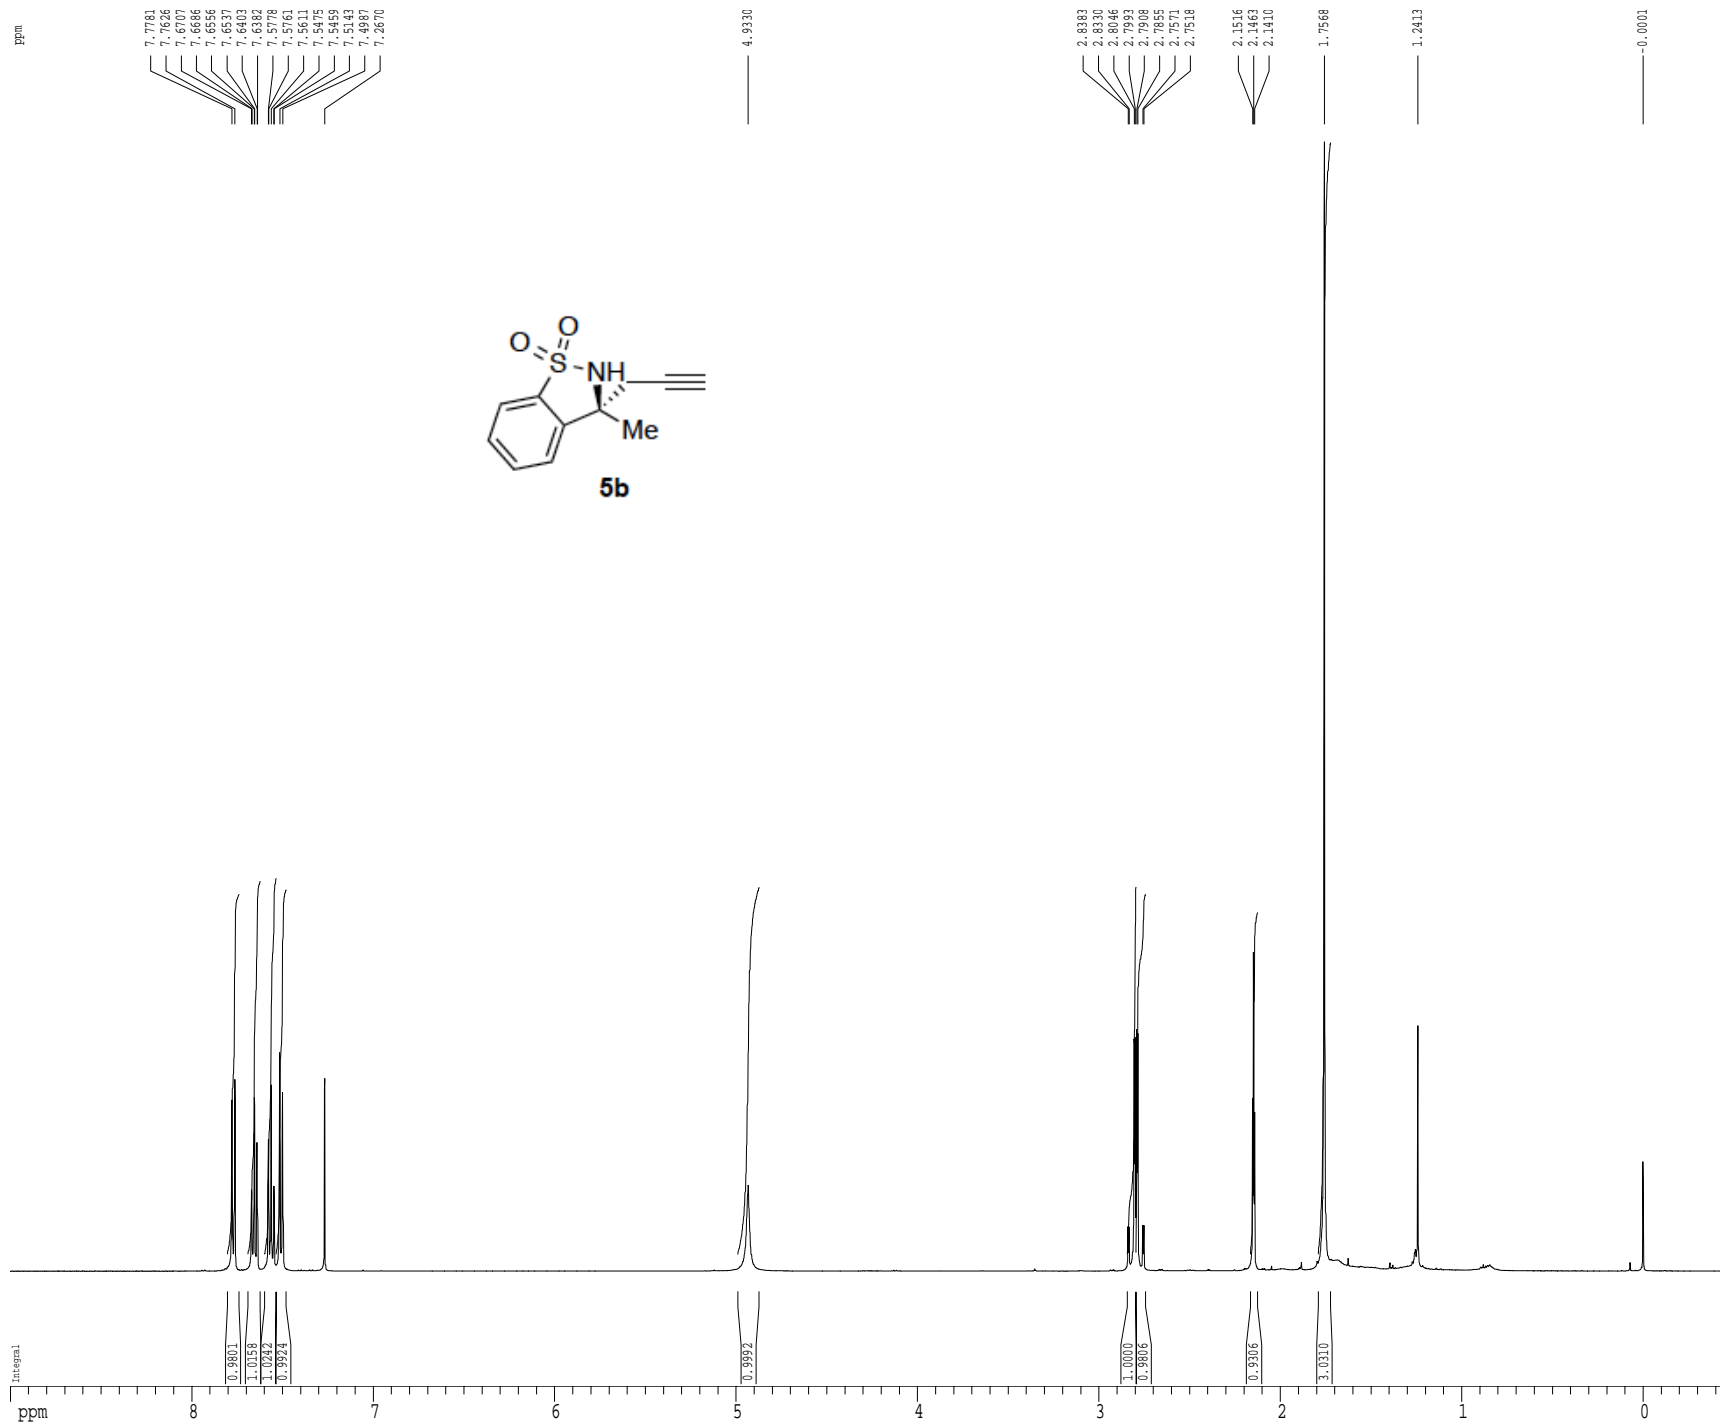

Current Data Parameters  
 USER osborn  
 NAME CAO-III-124B-SI  
 EXPNO 3  
 PROCNO 1

F2 - Acquisition Parameters  
 Date\_ 20150515  
 Time 16.42  
 INSTRUM cryo500  
 PROBHD 5 mm CPTCI 1H-  
 PULPROG zg30  
 TD 81728  
 SOLVENT CDCl3  
 NS 8  
 DS 2  
 SWH 8012.820 Hz  
 FIDRES 0.098043 Hz  
 AQ 5.0998774 sec  
 RG 5  
 DW 62.400 usec  
 DE 6.00 usec  
 TE 298.0 K  
 DL 0.10000000 sec  
 MCREST 0.00000000 sec  
 MCWEX 0.01500000 sec

===== CHANNEL f1 =====  
 NUC1 1H  
 P1 7.50 usec  
 PL1 1.60 dB  
 SF01 500.2235015 MHz

F2 - Processing parameters  
 SI 65536  
 SF 500.2200275 MHz  
 WDW EM  
 SSB 0  
 LB 0.30 Hz  
 GB 0  
 PC 4.00

1D NMR plot parameters  
 CX 22.80 cm  
 CY 15.00 cm  
 F1P 9.000 ppm  
 F1 4501.98 Hz  
 F2P -0.500 ppm  
 F2 -250.11 Hz  
 PPMCM 0.41667 ppm/cm  
 HZCM 208.42502 Hz/cm



Z-restored spin-echo 13C spectrum with 1H decoupling

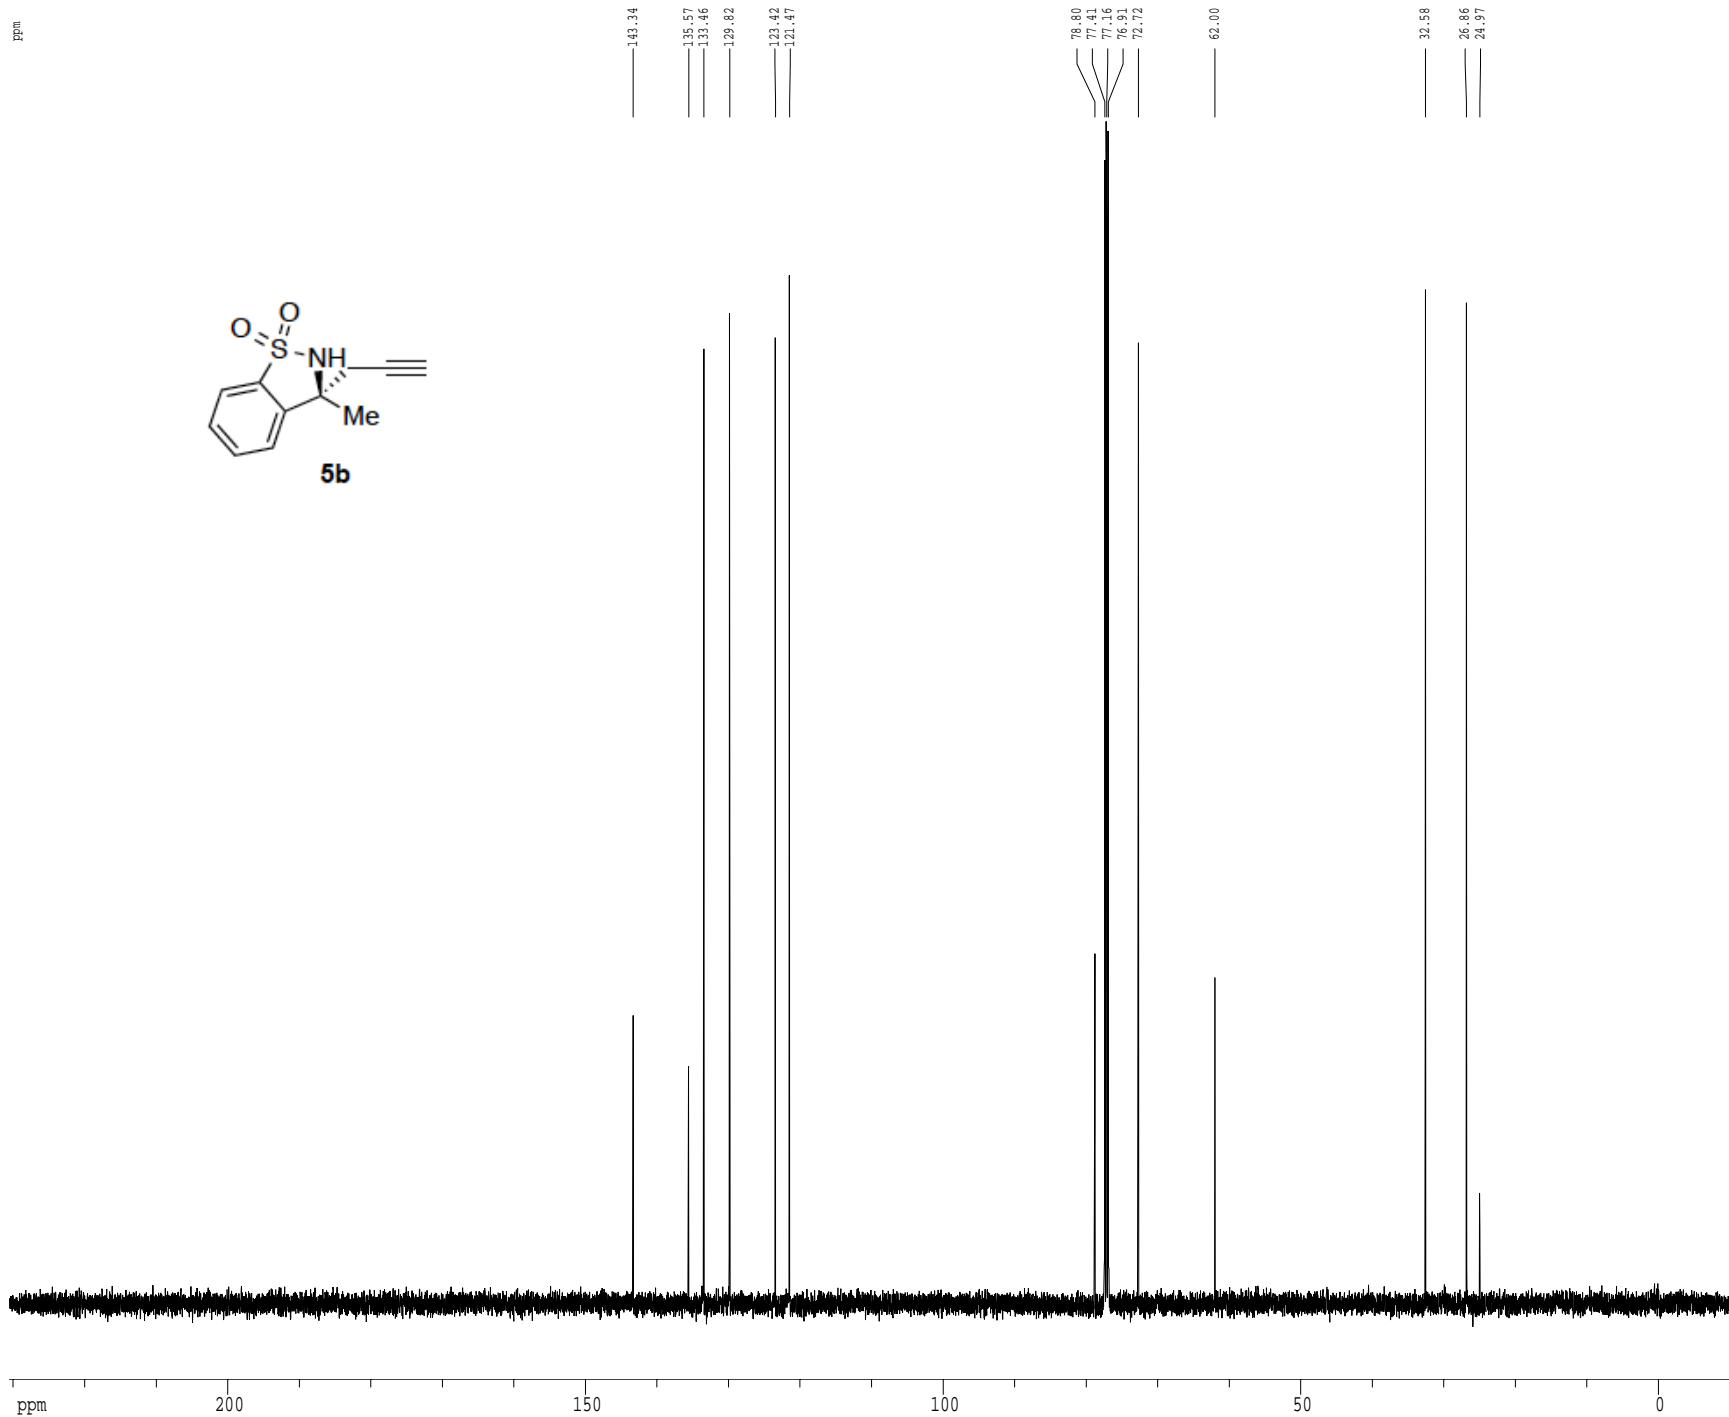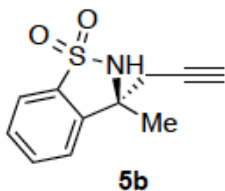

```

Current Data Parameters
USER      osborn
NAME      CAO-III-124B-SI
EXPNO     7
PROCNO    1

F2 - Acquisition Parameters
Date_     20150515
Time      19.31
INSTRUM   cryo500
PROBHD    5 mm CPTCI 1H-
PULPROG   SpinEchopg30gp.prd
TD         65536
SOLVENT   CDCl3
NS         201
DS         15
SWH        30303.031 Hz
FIDRES     0.462388 Hz
AQ         1.0813940 sec
RG         7298.2
DW         16.500 usec
DE         6.00 usec
TE         298.0 K
D1         0.25000000 sec
d11        0.03000000 sec
D16        0.00020000 sec
d17        0.00019600 sec
MCREST     0.00000000 sec
MCONRX     0.01500000 sec
P2         33.10 usec

===== CHANNEL f1 =====
NUC1       13c
P1         16.55 usec
P11        500.00 usec
P12        2000.00 usec
PL0        120.00 dB
PL1        -1.00 dB
SFO1       125.7942548 MHz
SF1        2.70 dB
SF2        2.70 dB
SFO1M1     Crp60,0.5,20.1
SFO1M2     Crp60comp,4
SFOFF1     0.00 Hz
SFOFF2     0.00 Hz

===== CHANNEL f2 =====
CPDPRG2    waltz16
NUC2       1H
PCPD2     100.00 usec
PL2       1.60 dB
PL12      24.50 dB
SFO2      500.2225011 MHz

===== GRADIENT CHANNEL =====
GENAM1     SINE.100
GENAM2     SINE.100
GFX1       0.00 %
GFX2       0.00 %
GPY1       0.00 %
GPY2       0.00 %
GPZ1       30.00 %
GPZ2       50.00 %
p15        500.00 usec
p16        1000.00 usec

F2 - Processing parameters
SI         65536
SF         125.7804103 MHz
WDW        EM
SSB        0
LB         1.00 Hz
GB         0
PC         2.00

ID NMR plot parameters
CX         22.80 cm
CY         15.65 cm
F1         230.637 ppm
F2         -10.287 ppm
F1         29009.68 Hz
F2         -1293.96 Hz
PFMCM      10.56688 ppm/cm
HZCM       1329.10693 Hz/cm
    
```

<sup>1</sup>H spectrum

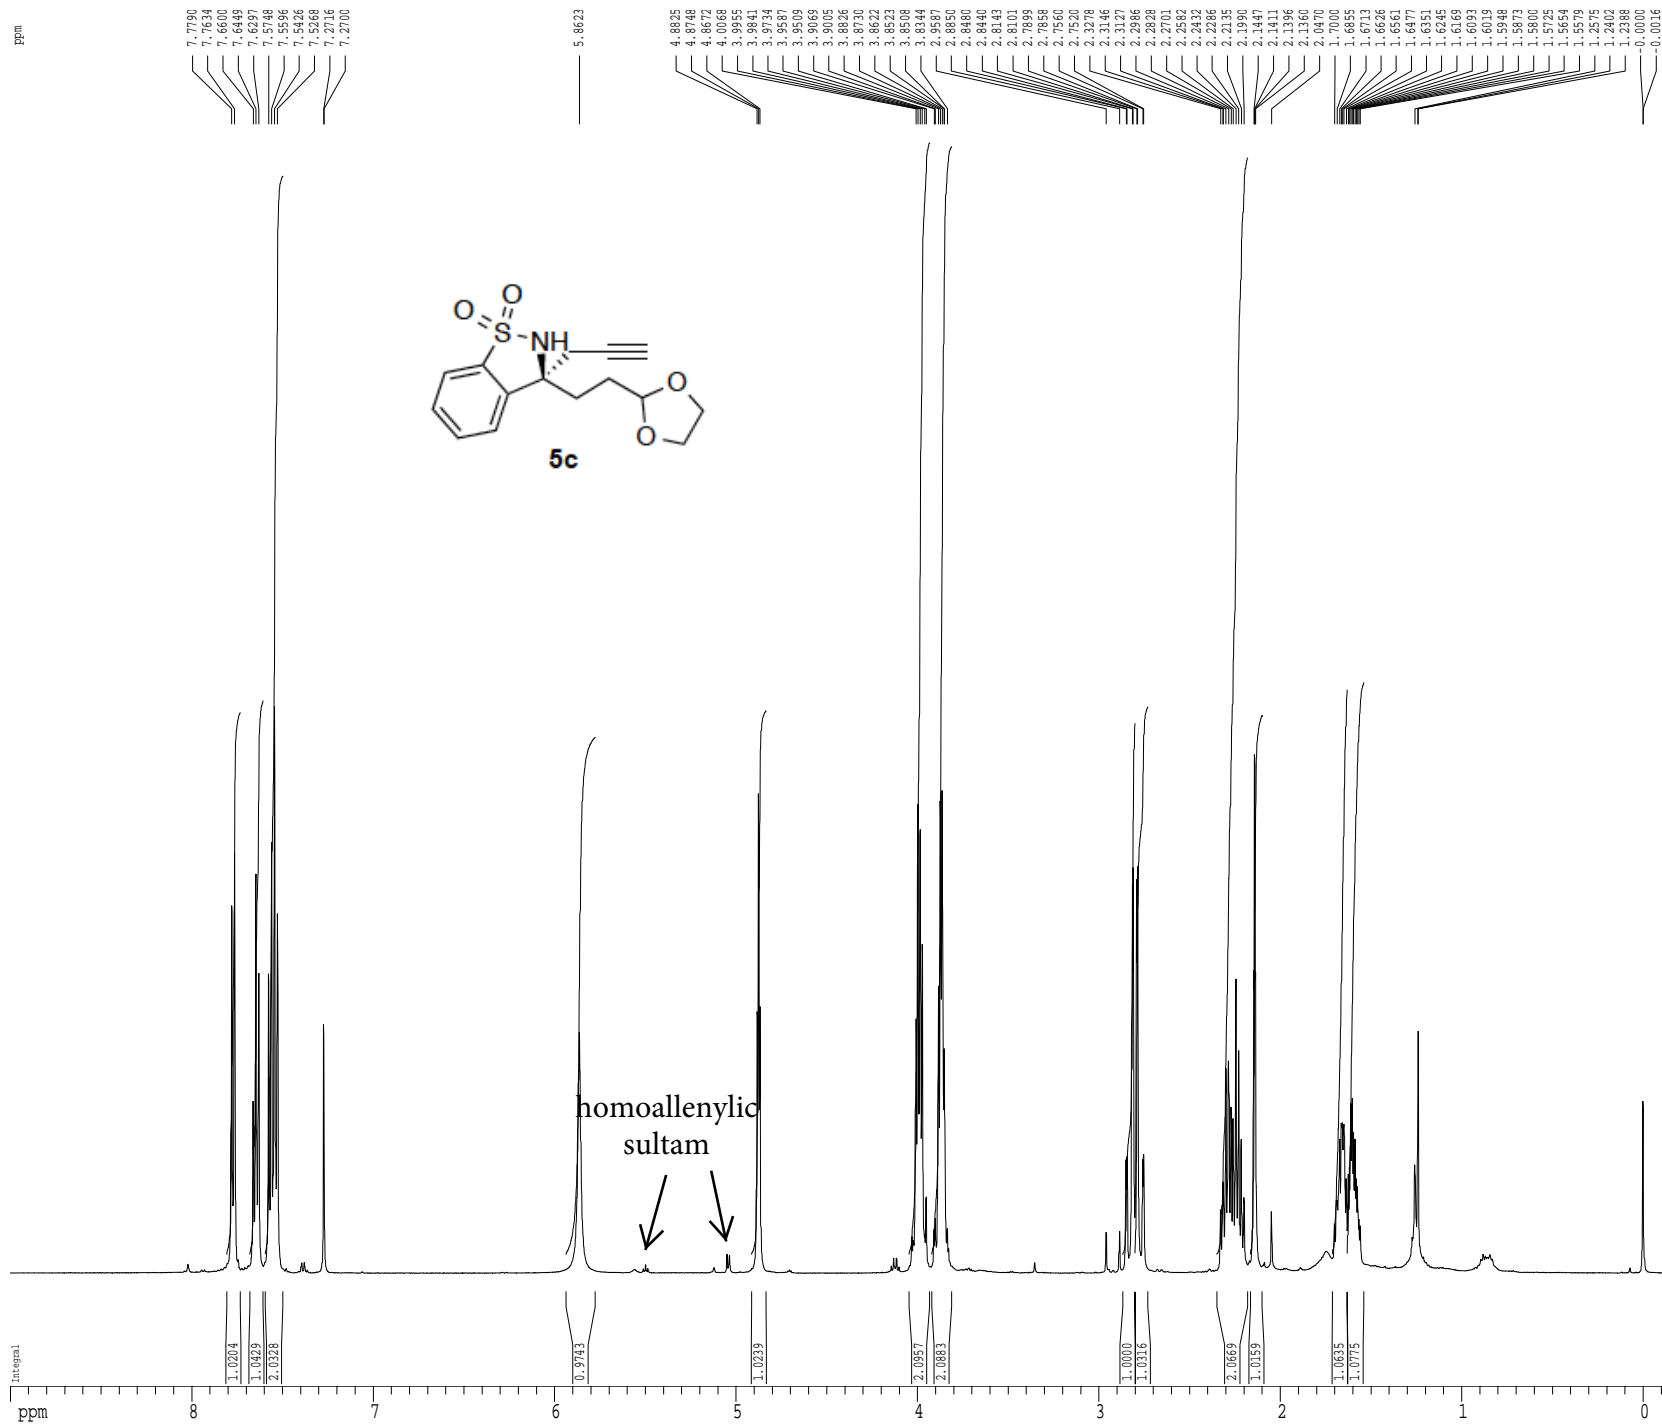

Current Data Parameters  
 USER osborn  
 NAME CAO-III-123B-S1  
 EXPNO 1  
 PROCNO 1

F2 - Acquisition Parameters  
 Date\_ 20150331  
 Time 16.06  
 INSTRUM cryo500  
 PROBHD 5 mm CPTCI 1H-  
 PULPROG zg30  
 TD 81728  
 SOLVENT CDCl3  
 NS 8  
 DS 2  
 SWH 8012.820 Hz  
 FIDRES 0.098043 Hz  
 AQ 5.0998774 sec  
 RG 4.5  
 DW 62.400 usec  
 DE 6.00 usec  
 TE 298.0 K  
 DL 0.10000000 sec  
 MCREST 0.00000000 sec  
 MCWEX 0.01500000 sec

===== CHANNEL f1 =====  
 NUC1 1H  
 P1 7.50 usec  
 PL1 1.60 dB  
 SF01 500.2235015 MHz

F2 - Processing parameters  
 SI 65536  
 SF 500.2200253 MHz  
 WDW EM  
 SSB 0  
 LB 0.30 Hz  
 GB 0  
 PC 4.00

1D NMR plot parameters  
 CX 22.80 cm  
 CY 7.50 cm  
 F1P 9.000 ppm  
 F1 4501.98 Hz  
 F2P -0.500 ppm  
 F2 -250.11 Hz  
 PPMCM 0.41667 ppm/cm  
 HZCM 208.42502 Hz/cm

Z-restored spin-echo 13C spectrum with 1H decoupling

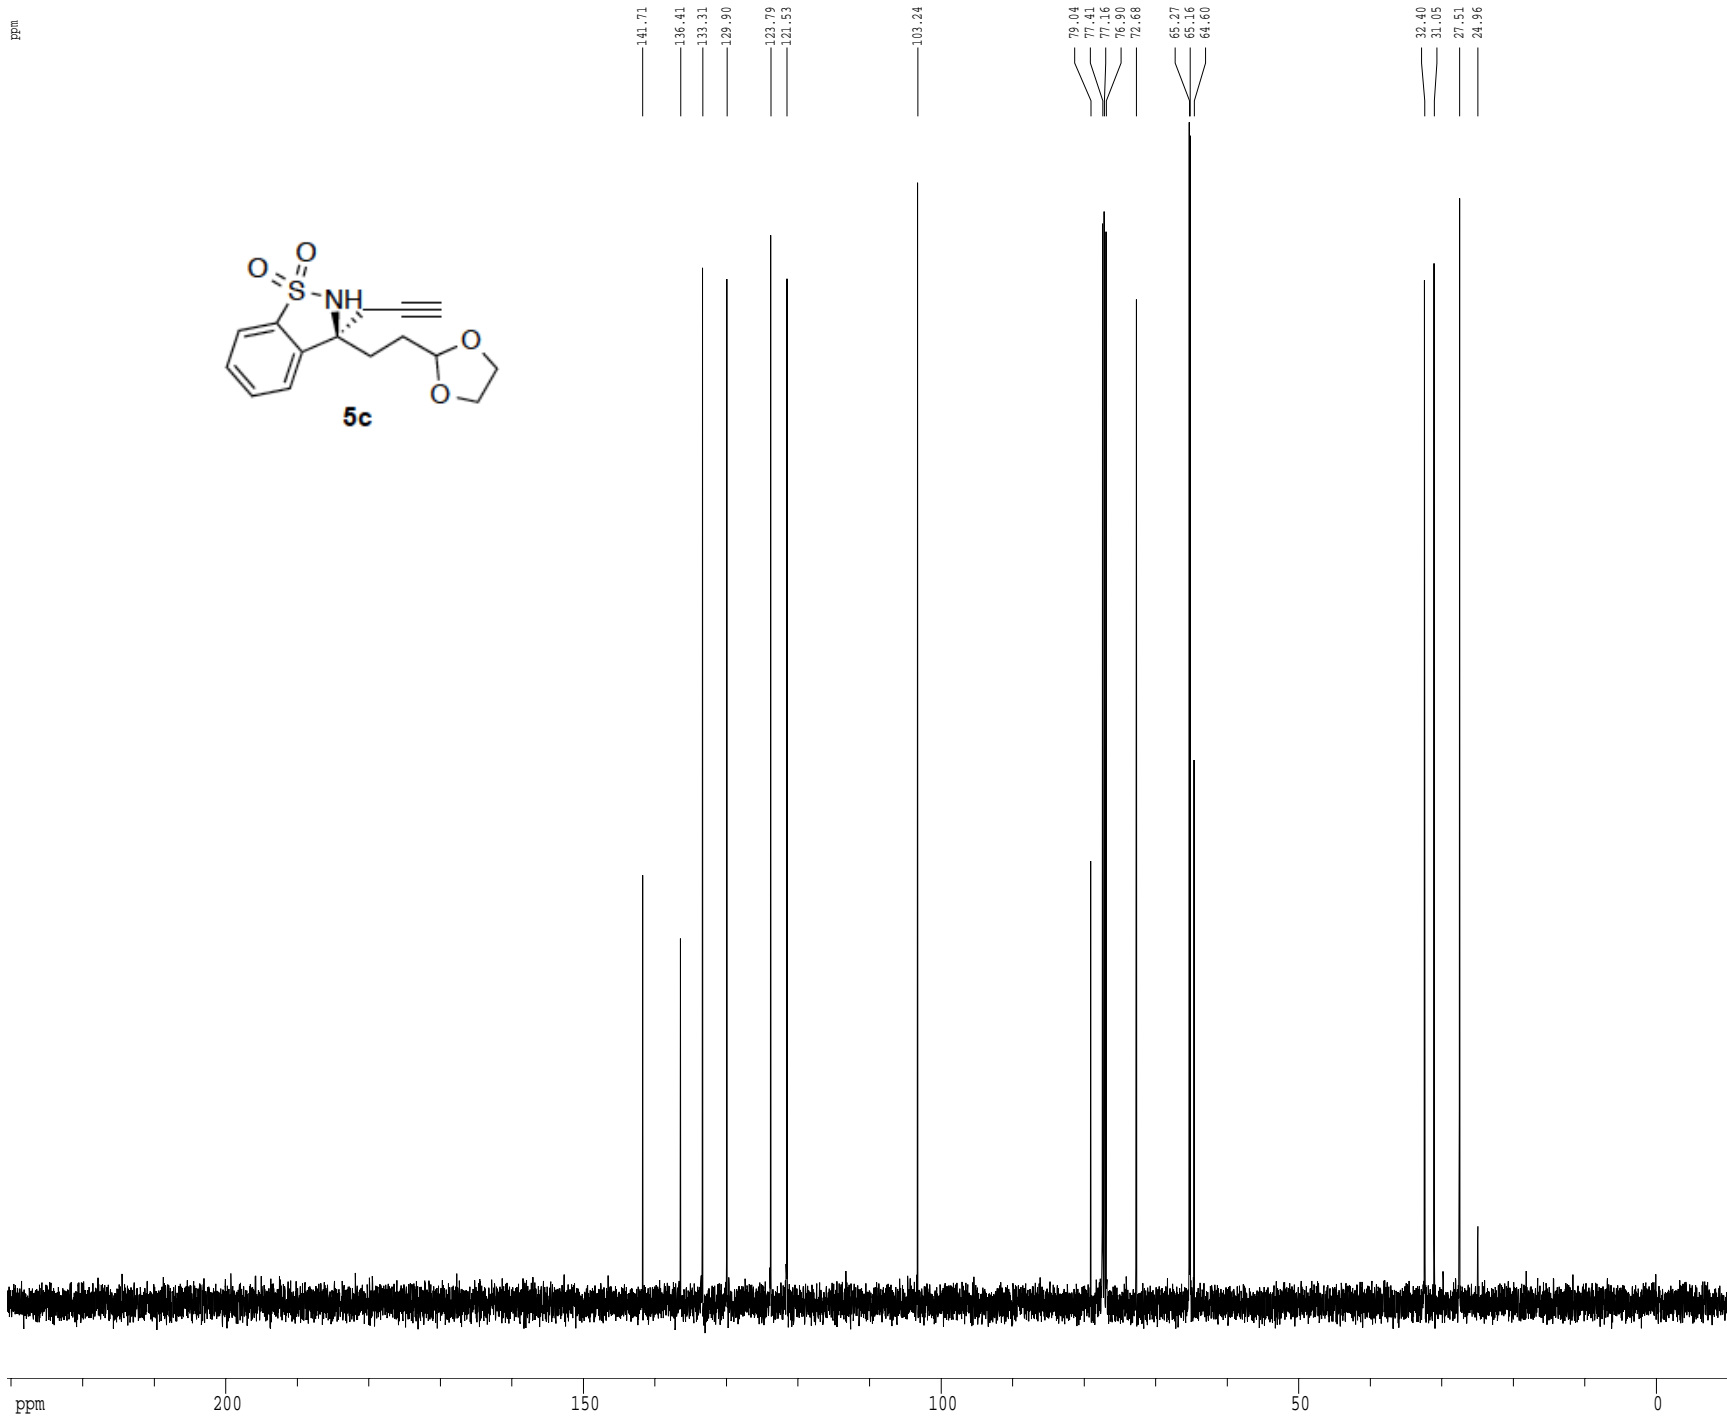

```

Current Data Parameters
USER      osborn
NAME      CAO-III-123B-SI
EXPNO     2
PROCNO    1

F2 - Acquisition Parameters
Date_     20150331
Time      16.09
INSTRUM   cryo500
PROBHD    5 mm CPTCI 1H-
PULPROG   SpinEchopg30gp.prd
TD         65536
SOLVENT   CDCl3
NS         81
DS         16
SWH        30303.031 Hz
FIDRES     0.462388 Hz
AQ         1.0813940 sec
RG         9195.2
DW         16.500 usec
DE         6.00 usec
TE         298.0 K
D1         0.25000000 sec
d11        0.03000000 sec
D16        0.00020000 sec
d17        0.00019600 sec
MCREST     0.00000000 sec
MCONK      0.01500000 sec
P2         33.10 usec

===== CHANNEL f1 =====
NUC1       13c
P1         16.55 usec
P11        500.00 usec
P12        2000.00 usec
PL0        120.00 dB
PL1        -1.00 dB
SFO1       125.7942548 MHz
SF1        2.70 dB
SF2        2.70 dB
SFO1M1     Crp60,0.5,20.1
SFO1M2     Crp60comp,4
SFOFF1     0.00 Hz
SFOFF2     0.00 Hz

===== CHANNEL f2 =====
CPDPRG2    waltz16
NUC2       1H
PCPD2      100.00 usec
PL2        1.60 dB
PL12       24.50 dB
SFO2       500.2225011 MHz

===== GRADIENT CHANNEL =====
GENAM1     SINE.100
GENAM2     SINE.100
GFX1       0.00 %
GFX2       0.00 %
GPF1       0.00 %
GPF2       0.00 %
GPF3       0.00 %
GPF4       30.00 %
GPF5       50.00 %
p15        500.00 usec
p16        1000.00 usec

F2 - Processing parameters
SI         65536
SF         125.7804122 MHz
WDW        EM
SSB        0
LB         1.00 Hz
GB         0
PC         2.00

ID NMR plot parameters
CX         22.80 cm
CY         15.65 cm
F1P        230.637 ppm
F1         29009.68 Hz
F2P        -10.287 ppm
F2         -1293.96 Hz
PFMCM      10.56688 ppm/cm
HZCM       1329.10693 Hz/cm
    
```



z-restored spin-echo 13C spectrum with 1H decoupling

ppm

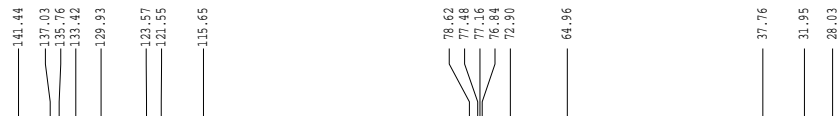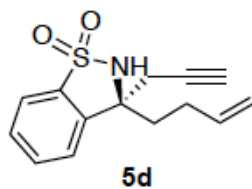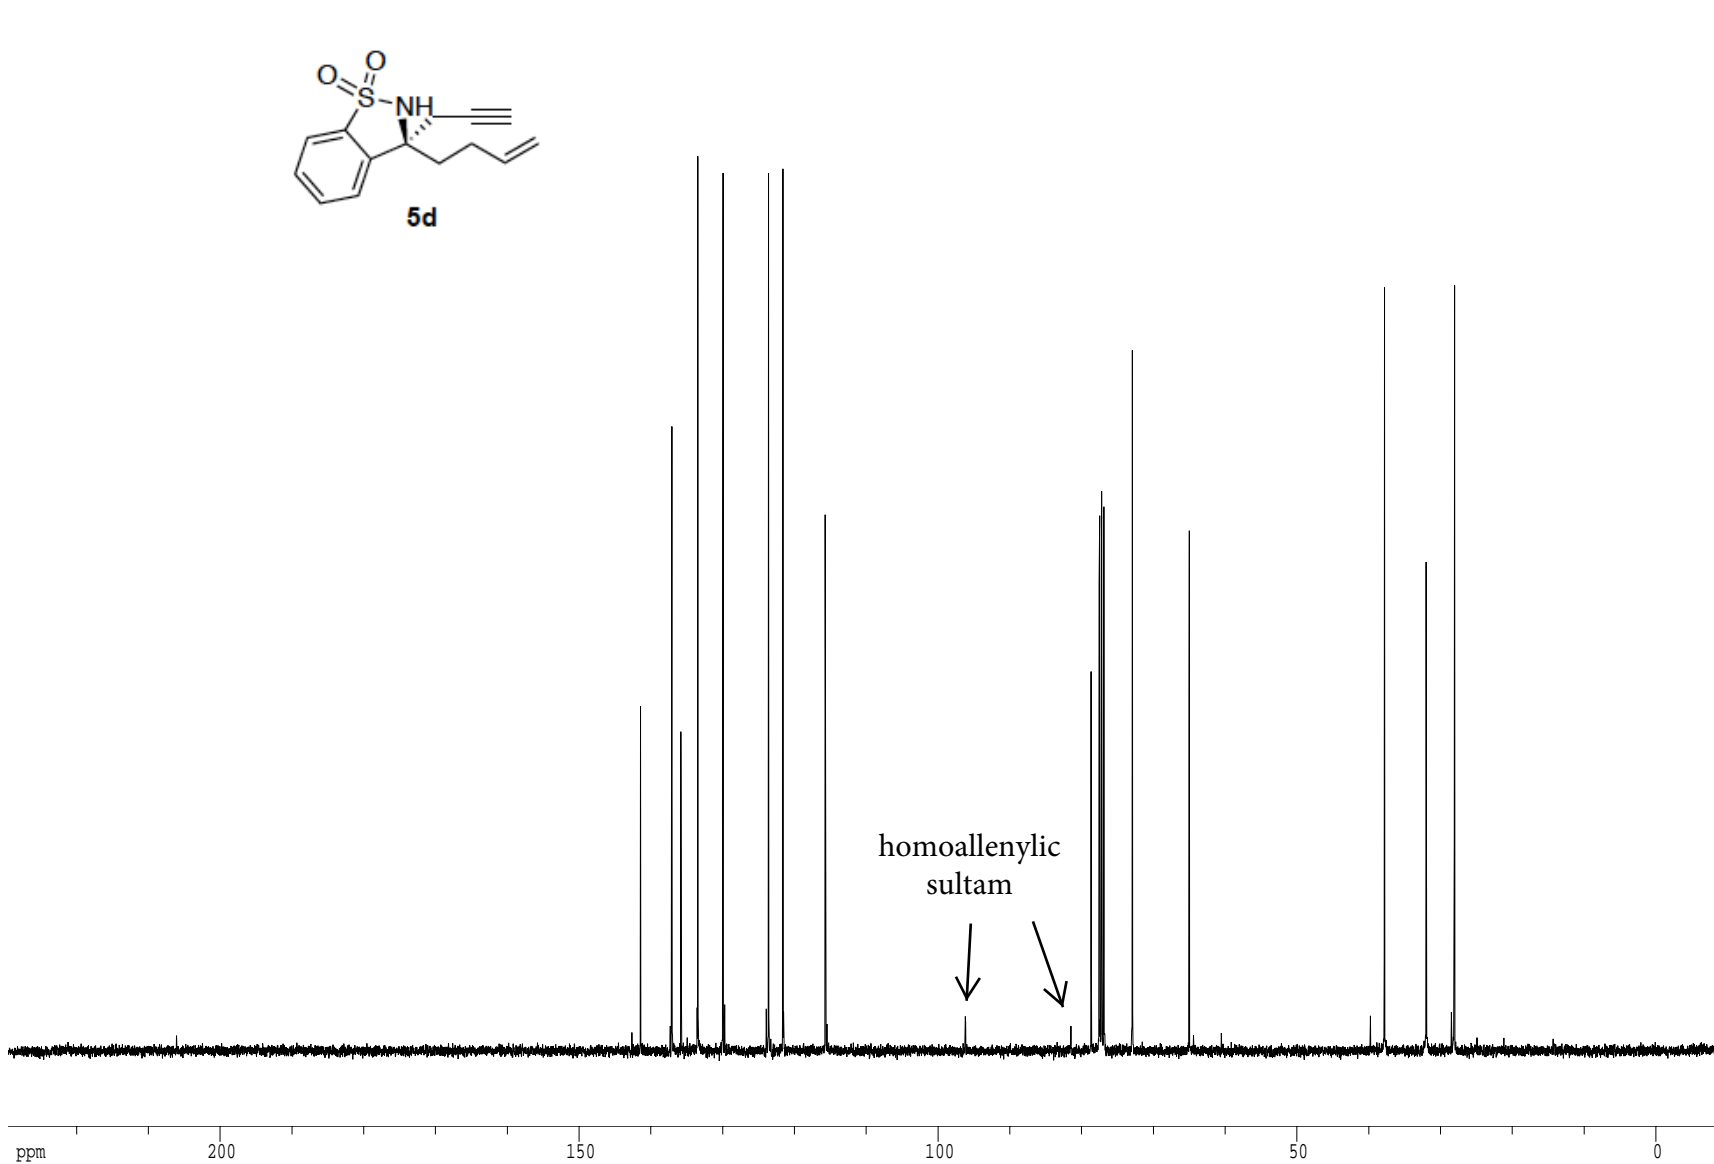

```

Current Data Parameters
USER      osborn
NAME     CAO-III-228B-SI
EXNO     2
PROCNO   1

F2 - Acquisition Parameters
Date_    20150714
Time     22.58
INSTRUM  drx400
PROBHD   5 mm QNP H/P/P
PULPROG  zgdc30
TD       65536
SOLVENT  CDCl3
NS       1024
DS       4
SWH      24154.590 Hz
FIDRES   0.368570 Hz
AQ       1.3566452 sec
RG       9195.2
DW       20.700 usec
DE       20.39 usec
TE       298.0 K
D1       0.10000000 sec
d11      0.03000000 sec
MCREST   0.00000000 sec
MCWREK   0.01500000 sec

===== CHANNEL f1 =====
NUC1     13C
P1       7.75 usec
PL1      -3.00 dB
SF01     100.6237964 MHz

===== CHANNEL f2 =====
CPDPRG2  mlev16
NUC2     1H
PCPD2    90.00 usec
PL2      0.00 dB
PL12     17.70 dB
SFO2     400.1328009 MHz

F2 - Processing parameters
SI       65536
SF       100.6127646 MHz
WDW      EM
SSB      0
LB       1.00 Hz
GB       0
PC       1.00

1D NMR plot parameters
CX       22.80 cm
CY       12.00 cm
F1P      229.496 ppm
F1       23090.21 Hz
F2P      -10.579 ppm
F2       -1064.37 Hz
PFMCM    10.52959 ppm/cm
HZCM     1059.41150 Hz/cm
    
```

<sup>1</sup>H spectrum

ppm

7.33510  
7.31427  
7.26712  
7.26011  
7.25475  
7.24009  
7.23802  
7.05750  
7.03735

3.07050  
3.06423  
3.02769  
3.02144  
2.82698  
2.82056  
2.78416  
2.77776  
2.13153  
2.12514  
2.11879  
1.81109

0.00654

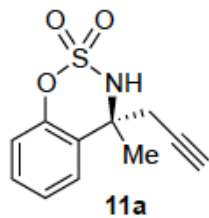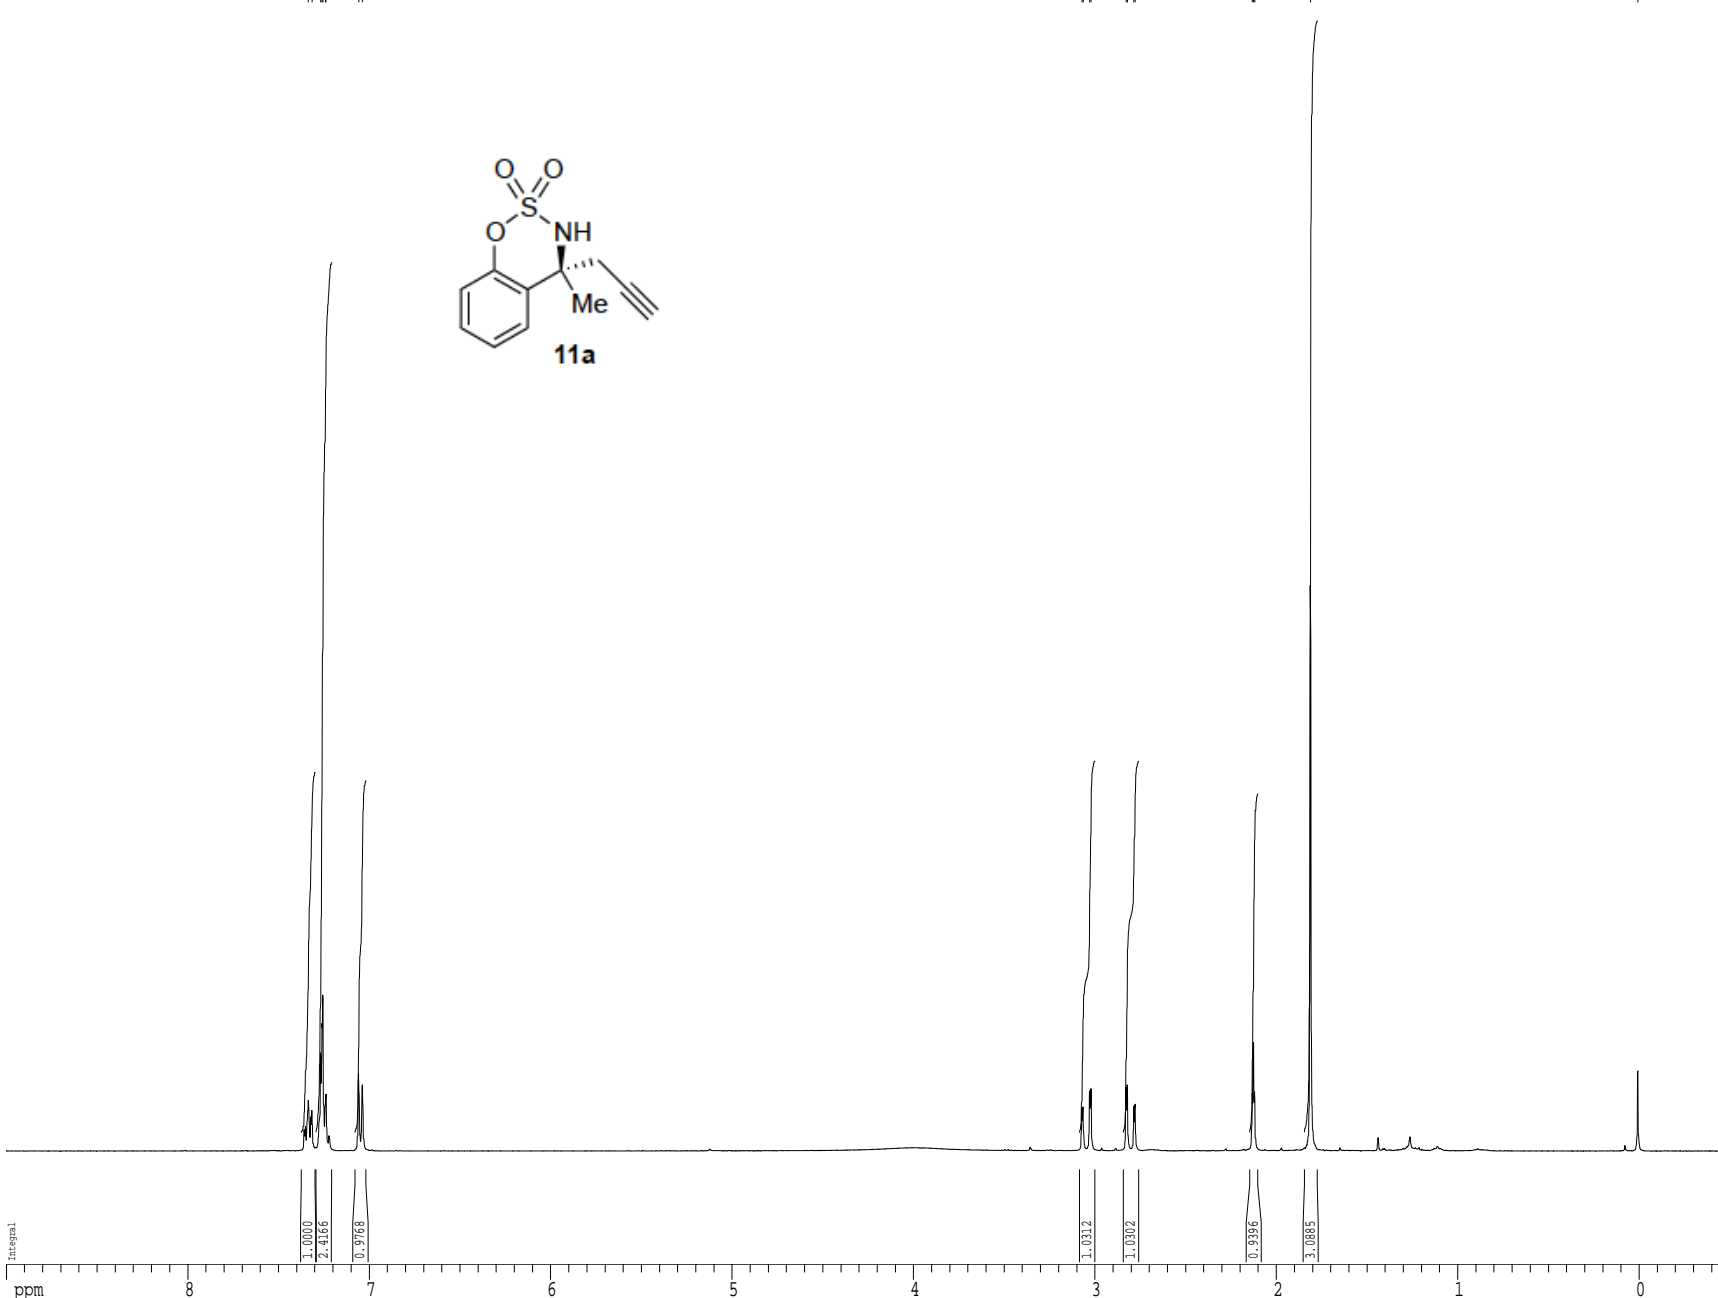

```

Current Data Parameters
NAME      endean
EXPNO     1
PROCNO    1

F2 - Acquisition Parameters
Date_     20150510
Time      16.33
INSTRUM   dxr400
PROBHD    5 mm QNP H/F/P
PULPROG   zg30
TD         65536
SOLVENT   CDCl3
NS         8
DS         2
SWH        6410.256 Hz
FIDRES     0.097813 Hz
AQ         5.1118579 sec
RG         362
DM         78.000 usec
DE         4.50 usec
TE         298.0 K
D1         0.10000000 sec
MCREST    0.00000000 sec
MCWEX     0.01500000 sec

***** CHANNEL f1 *****
NUC1      1H
P1        12.00 usec
PL1       0.00 dB
SFO1     400.1328009 MHz

F2 - Processing parameters
SI         65536
SF         400.1300175 MHz
WDW        EM
SSB        0
LB         0.30 Hz
GB         0
PC         2.00

ID NMR plot parameters
CX         22.80 cm
CY         7.50 cm
F1P        9.000 ppm
F1         3601.17 Hz
F2P        -0.500 ppm
F2         -200.06 Hz
PPMCM     0.41667 ppm/cm
HZCM      166.72084 Hz/cm
    
```

Z-restored spin-echo 13C spectrum with 1H decoupling

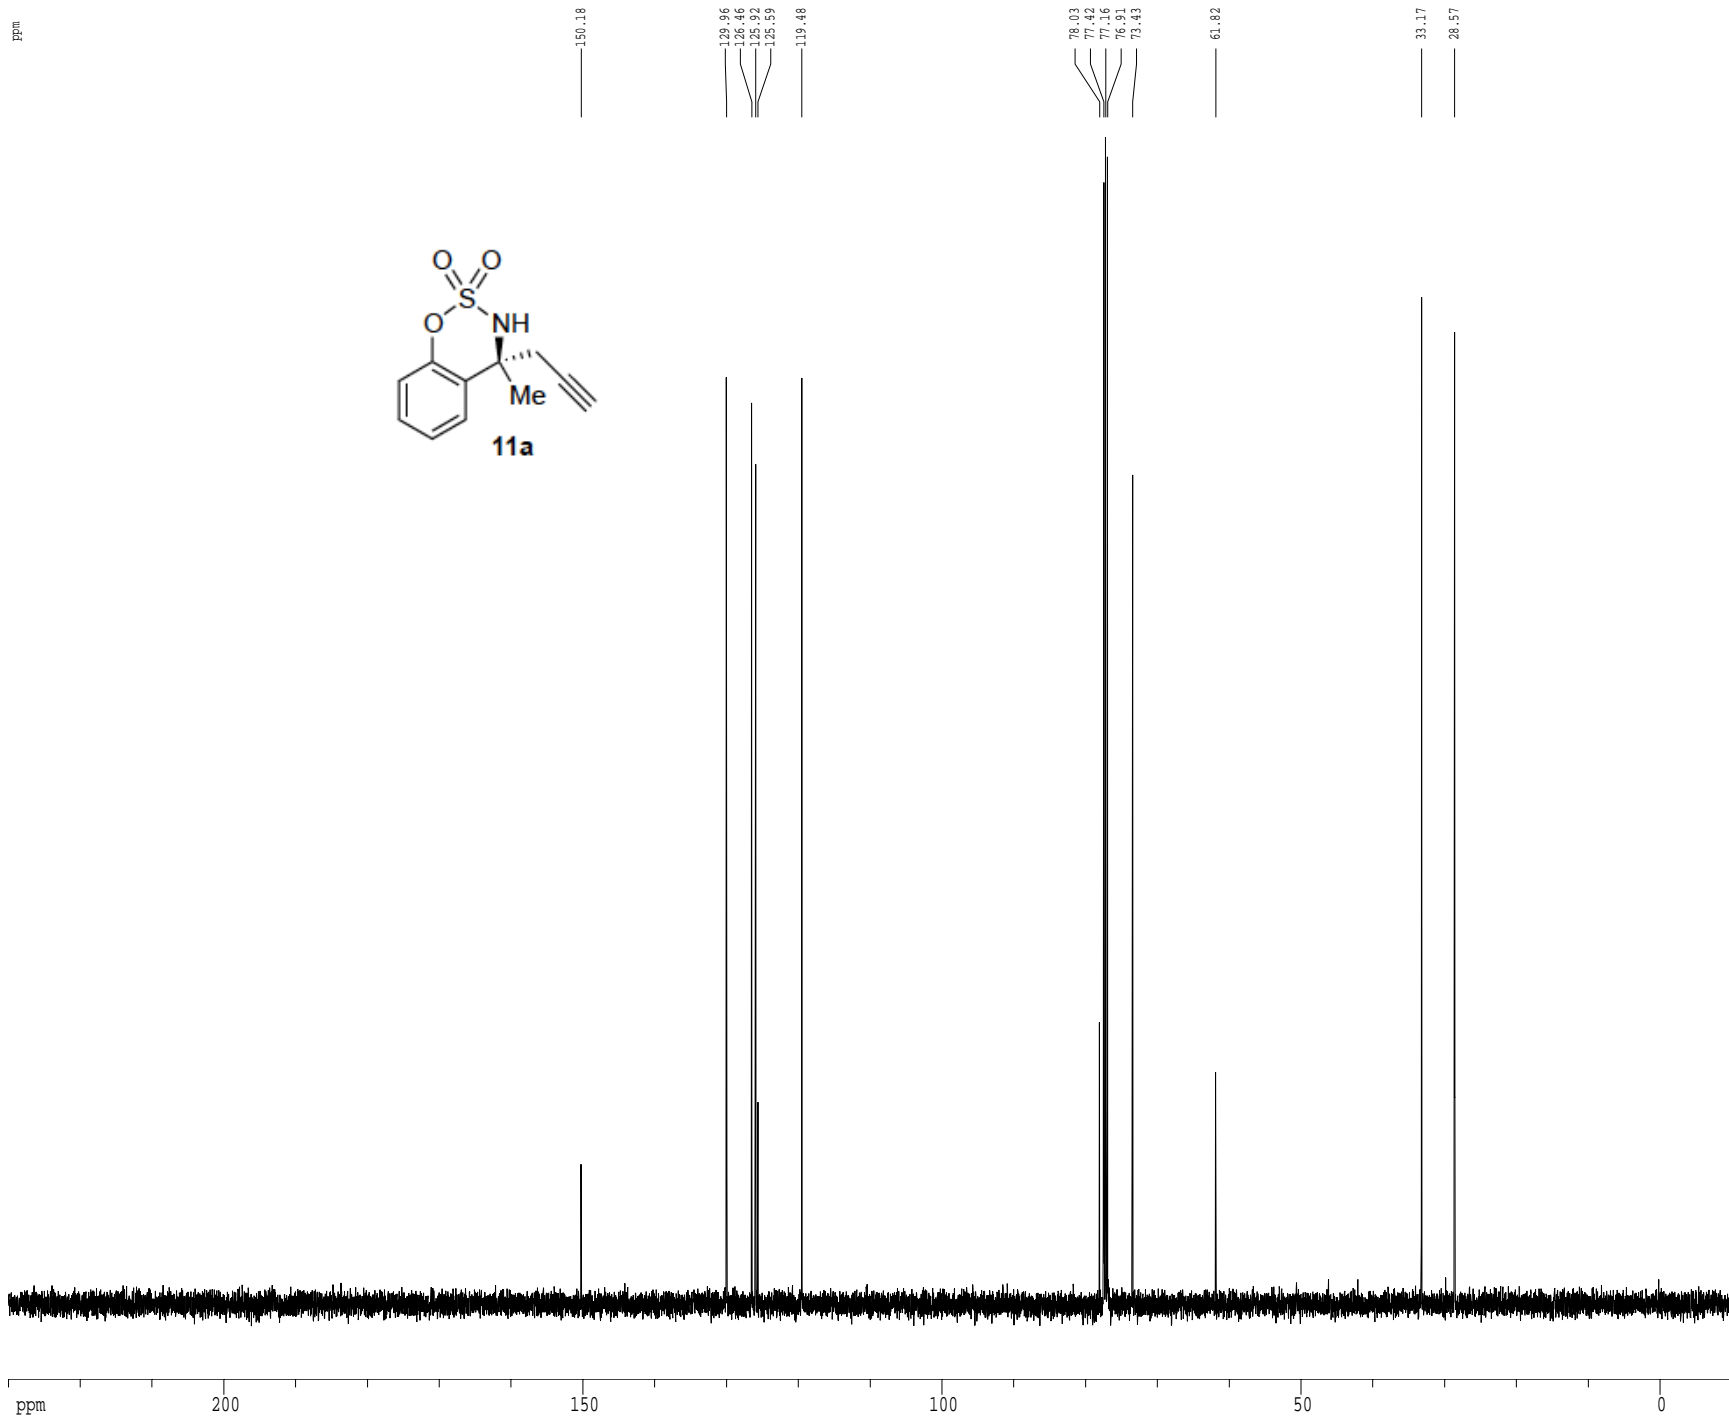

```

Current Data Parameters
USER          endean
NAME         TBDE-1-179-prop-pure-char
EXPNO        2
PROCNO       1

F2 - Acquisition Parameters
Date_        20150510
Time         17.25
INSTRUM      cryo500
PROBHD       5 mm CPY1 1H-
PULPROG      SpinEcho30pp.prd
TD           65536
SOLVENT      CDCl3
NS           264
DS           16
SMH          30303.031 Hz
FIDRES       0.462388 Hz
AQ           1.0813940 sec
RG           3251
DW           16.500 usec
DE           6.00 usec
TE           298.0 K
D1           0.25000000 sec
d11          0.03000000 sec
D16          0.00020000 sec
d17          0.00019600 sec
MCREST       0.00000000 sec
MKRR         0.01500000 sec
P2           33.10 usec

***** CHANNEL f1 *****
NUC1          13C
P1            16.55 usec
P11           500.00 usec
P12           2000.00 usec
PL0           120.00 dB
PL1           -1.00 dB
SFO1          125.7842548 MHz
SP1           2.70 dB
SP2           2.70 dB
SFO2          Crp60.0 & 20.1
SFO3          Crp60comp.4
SPOFF1        0.00 Hz
SPOFF2        0.00 Hz

***** CHANNEL f2 *****
CPDPRG2       waltz16
NUC2           1H
PCPD2         100.00 usec
PL2           1.60 dB
PL12          24.50 dB
SFO2          500.2225011 MHz

***** GRADIENT CHANNEL *****
GPRAM1        SINE.100
GPRAM2        SINE.100
GFX1          0.00 %
GFX2          0.00 %
GFX3          0.00 %
GFX4          0.00 %
GFX5          30.00 %
GFX6          50.00 %
p15           500.00 usec
p16           1000.00 usec

F2 - Processing parameters
SI            65536
SF            125.7804085 MHz
WDW           EM
SSB           0
LB            1.00 Hz
GB            0
PC            2.00

1D NMR plot parameters
CX            22.80 cm
CY            15.65 cm
FIP           230.000 ppm
F1            28929.49 Hz
F2P           -10.000 ppm
F2            -1257.80 Hz
PPHMCN        10.52632 ppm/cm
HECN          1324.00439 Hz/cm
    
```

<sup>1</sup>H spectrum

ppm

7.36119  
7.35570  
7.33909  
7.32396  
7.31856  
7.28163  
7.26760  
7.25990  
7.23974  
7.22014  
7.06778  
7.04724

3.05917  
3.05266  
3.04643  
3.03932  
3.03284  
2.88634  
2.88024  
2.88412  
2.84768  
2.25700  
2.23842  
2.22002  
2.20136  
2.18265  
2.16527  
2.14872  
2.11259  
2.09484  
2.07639  
2.05798  
2.03951  
1.43857  
1.26200  
0.95321  
0.93478  
0.91630

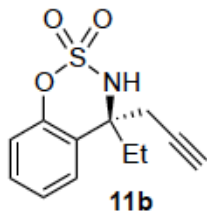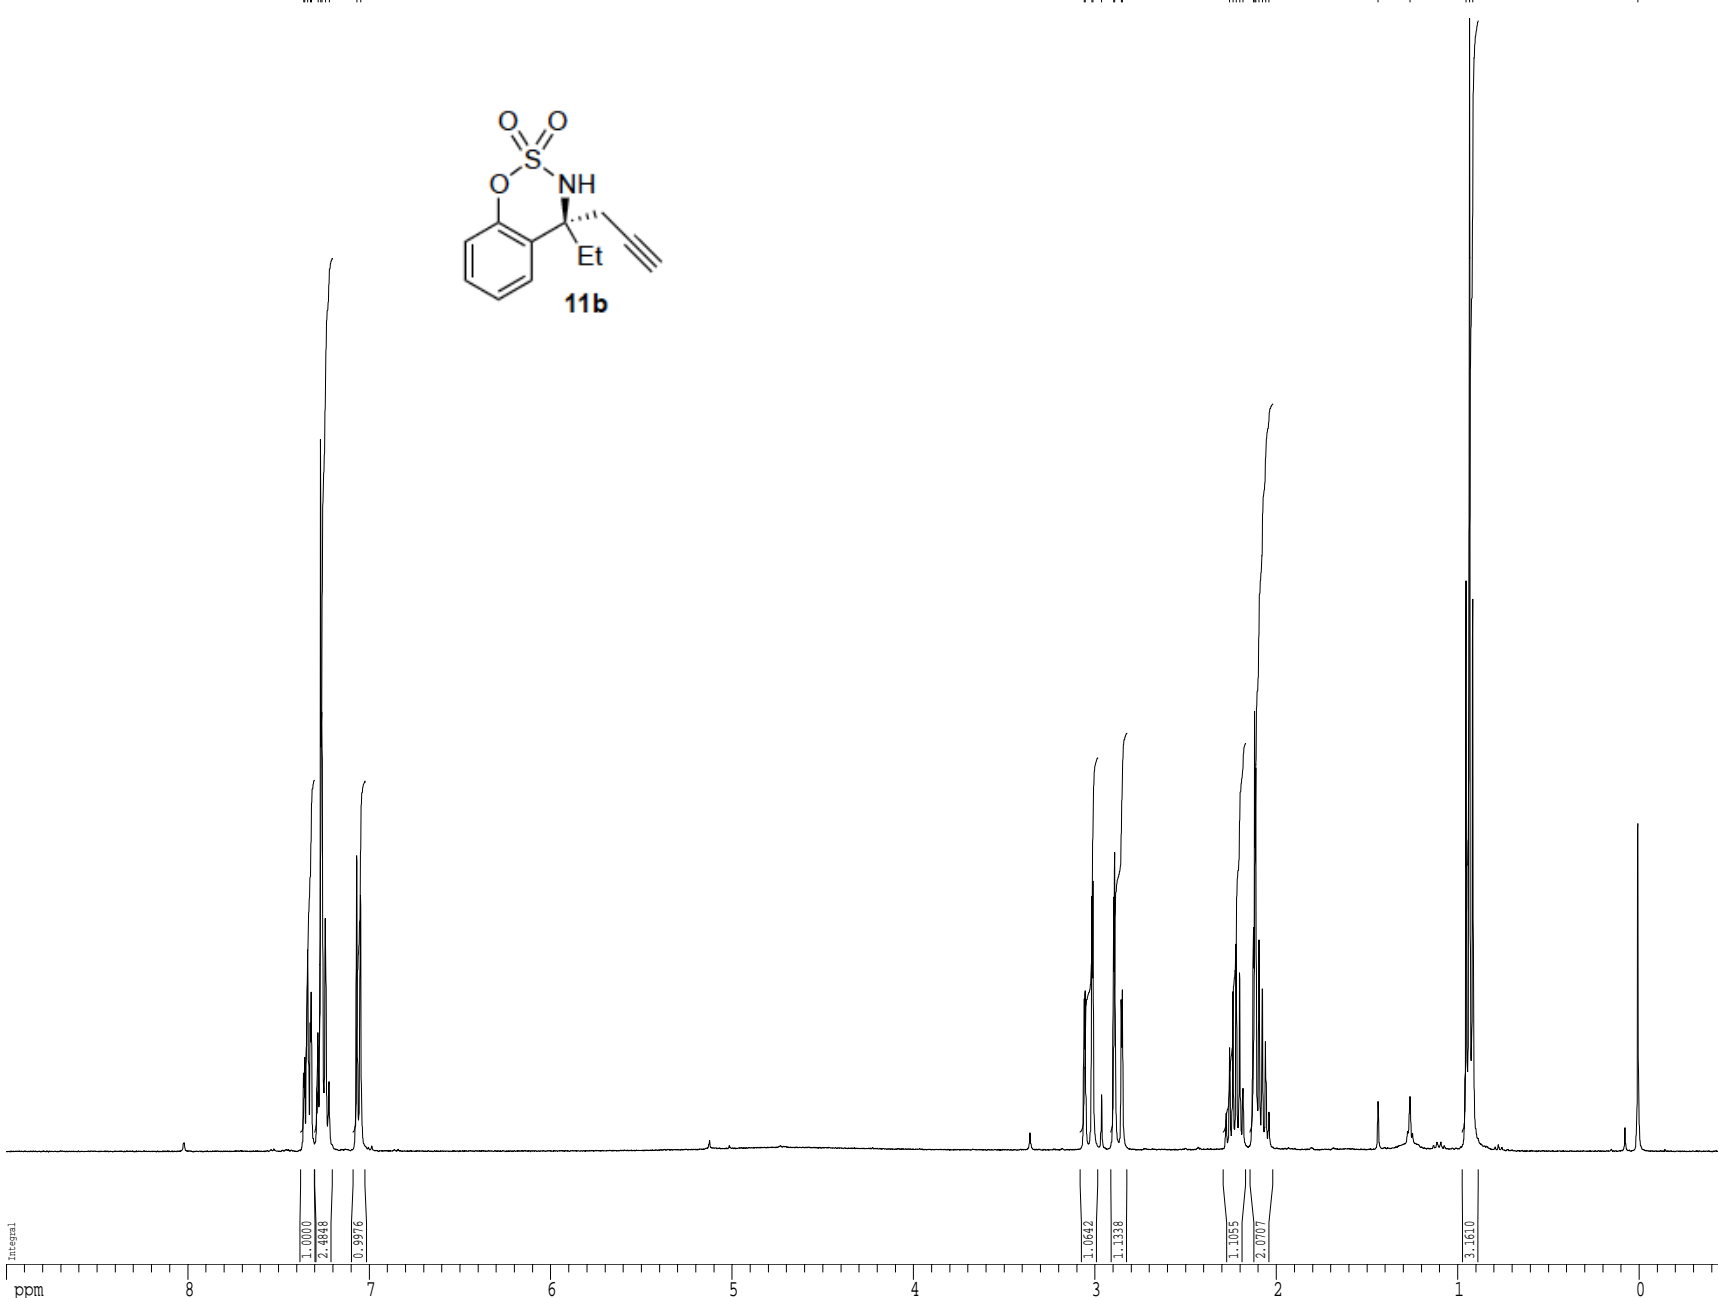

Current Data Parameters  
 USER endean  
 NAME T8DE-I-181-prop-pure-char  
 EXPNO 1  
 PROCNO 1  
 F2 - Acquisition Parameters  
 Date\_ 20150510  
 Time 16:37  
 INSTRUM dxr400  
 PROBRD 5 mm QNP H/F/P  
 PULPROG zg30  
 TD 65536  
 SOLVENT CDCl3  
 NS 8  
 DS 2  
 SWH 6410.256 Hz  
 FIDRES 0.097813 Hz  
 AQ 5.1118579 sec  
 RG 362  
 DW 78.000 usec  
 DE 4.50 usec  
 TE 298.0 K  
 D1 0.1000000 sec  
 MCREST 0.0000000 sec  
 MCWEX 0.0150000 sec  
 ===== CHANNEL f1 =====  
 NUC1 1H  
 P1 12.00 usec  
 PL1 0.00 dB  
 SFO1 400.1328009 MHz  
 F2 - Processing parameters  
 SI 65536  
 SF 400.1300175 MHz  
 WDW EM  
 SSB 0  
 LB 0.30 Hz  
 GB 0  
 PC 2.00  
 ID NMR plot parameters  
 CX 22.80 cm  
 CY 15.00 cm  
 F1P 9.000 ppm  
 F1 3601.17 Hz  
 F2P -0.500 ppm  
 F2 -200.06 Hz  
 PPMCM 0.41667 ppm/cm  
 HZCM 166.72084 Hz/cm



Z-restored spin-echo 13C spectrum with 1H decoupling

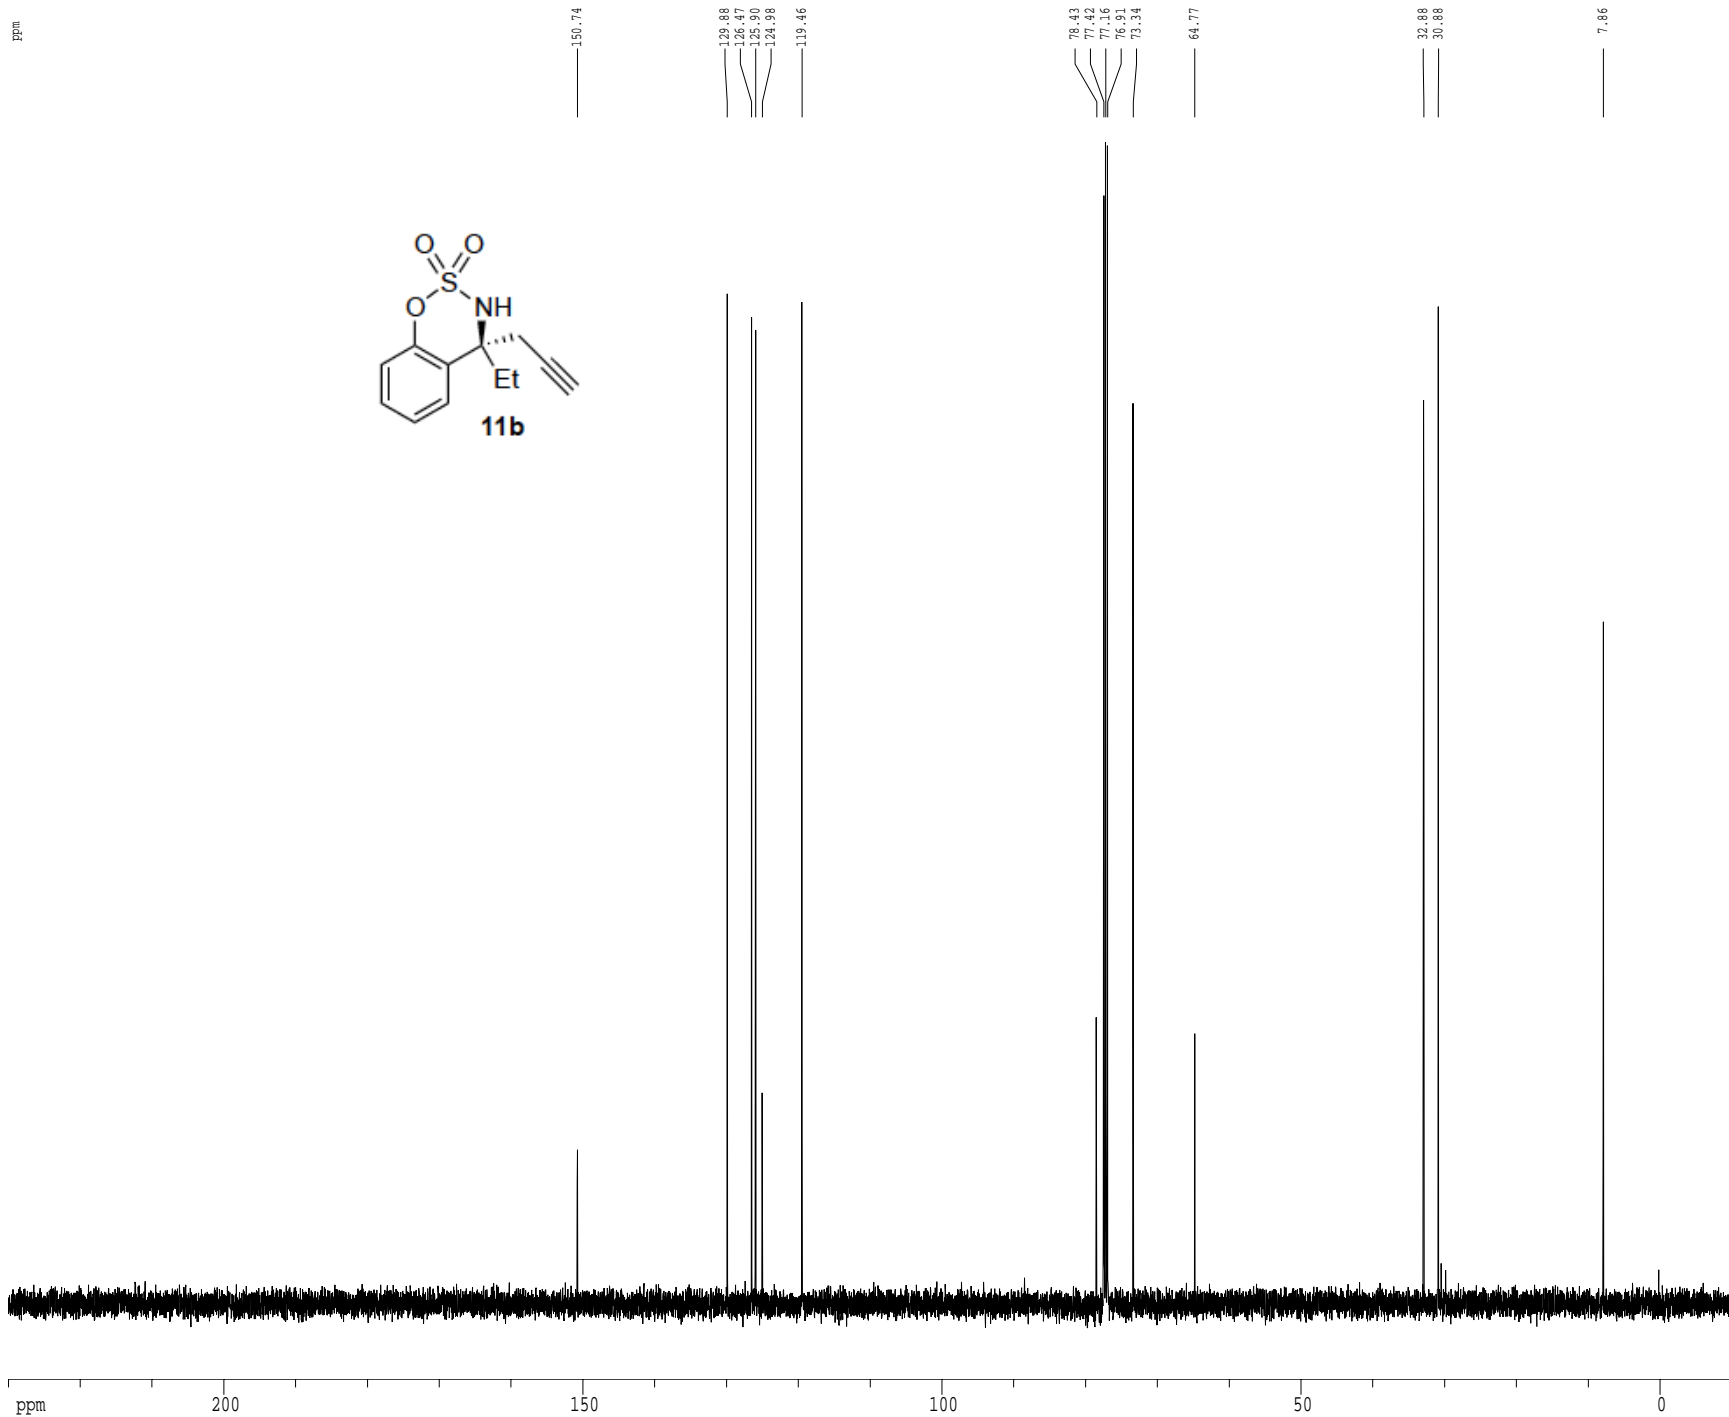

```

Current Data Parameters
USER          endean
NAME          TBDE-1-181-prop-pure-char
EXPNO        2
PROCNO       1

F2 - Acquisition Parameters
Date_        20150510
Time         17.36
INSTRUM      cryo500
PROBHD       5 mm CPY1 1H-
PULPROG      SpinEchoq3Dg-prd
TD           65536
SOLVENT      CDCl3
NS           288
DS           16
SMH          30303.031 Hz
FIDRES       0.462388 Hz
AQ           1.0813940 sec
RG           7298.2
DW           16.500 usec
DE           6.00 usec
TE           298.0 K
D1           0.25000000 sec
d11          0.03000000 sec
D16          0.00020000 sec
d17          0.00019600 sec
MCREST       0.00000000 sec
MWRK        0.01500000 sec
P2           33.10 usec

***** CHANNEL f1 *****
NUC1          13C
P1            16.55 usec
PL1           500.00 usec
PL2           2000.00 usec
PL0           120.00 dB
PL1           -1.00 dB
SFO1          125.7842548 MHz
SP1           2.70 dB
SP2           2.70 dB
SFO2          Crp60.0 & 20.1
SPNAM1        Crp60.0 & 20.1
SPNAM2        Crp60comp.4
SPOFF1        0.00 Hz
SPOFF2        0.00 Hz

***** CHANNEL f2 *****
CPDPRG2       waltz16
NUC2          1H
PCPD2         100.00 usec
PL2           1.60 dB
PL12          24.50 dB
SFO2          500.2225011 MHz

***** GRADIENT CHANNEL *****
GPRAM1        SINE.100
GPRAM2        SINE.100
GFX1          0.00 %
GFX2          0.00 %
GFX3          0.00 %
GFX4          0.00 %
GFX5          30.00 %
GFX6          50.00 %
p15           500.00 usec
p16           1000.00 usec

F2 - Processing parameters
SI            65536
SF            125.7804085 MHz
WDW           EM
SSB           0
LB            1.00 Hz
GB            0
PC            2.00

1D NMR plot parameters
CX            22.80 cm
CY            15.65 cm
FIP           230.000 ppm
F1            28929.49 Hz
F2P           -10.000 ppm
F2            -1257.80 Hz
PPHMC         10.52632 ppm/cm
HEM          1324.00439 Hz/cm
    
```



Z-restored spin-echo 13C spectrum with 1H decoupling

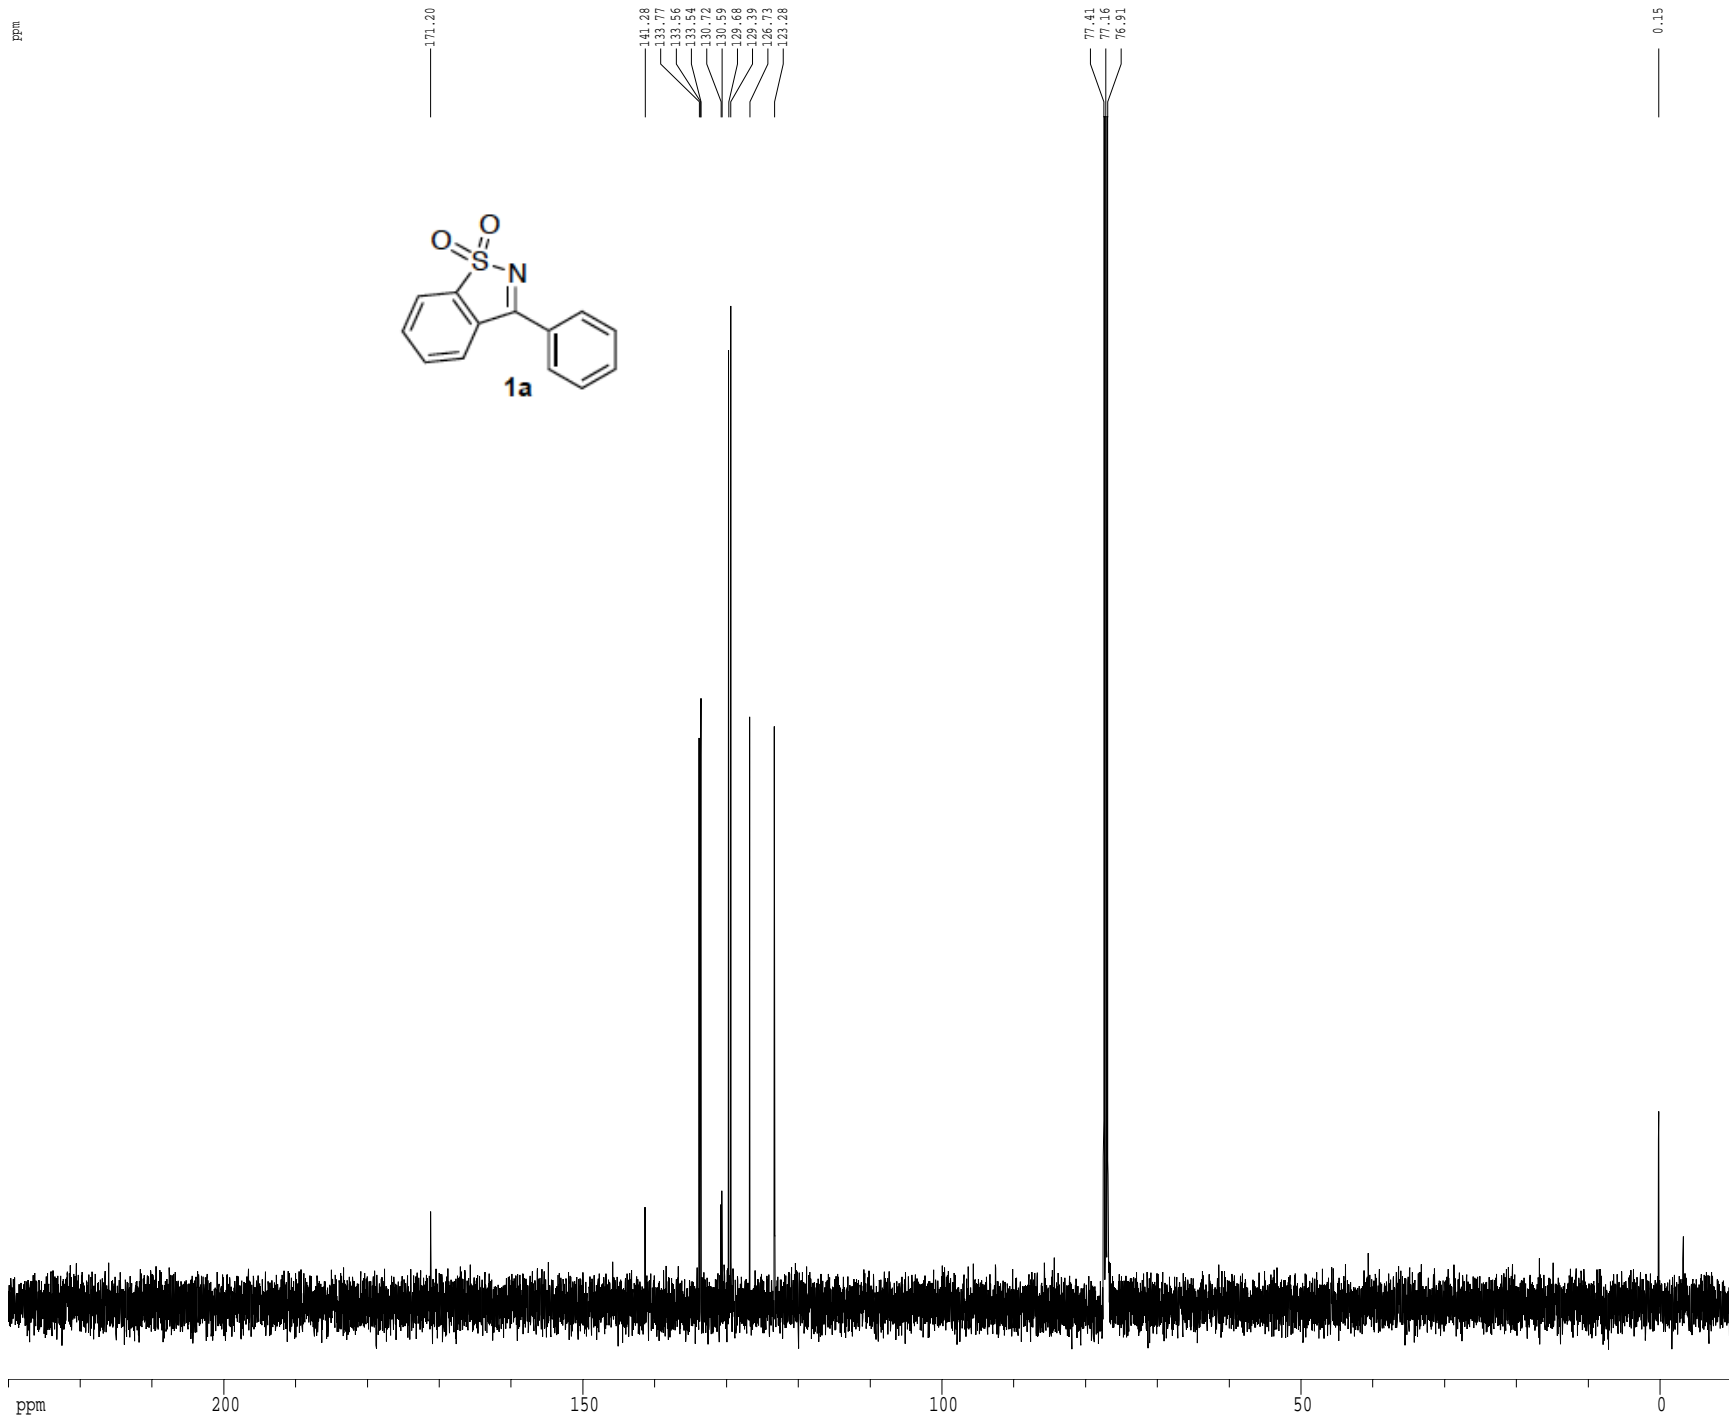

```

Current Data Parameters
NAME      endean
EXPNO     2
PROCNO    1

F2 - Acquisition Parameters
Date_     20141116
Time      15.16
INSTRUM   cryo500
PROBHD    5 mm CPXI 1H-
PULPROG   SpinEcho30gprd
TD         65536
SOLVENT   CDCl3
NS         1024
DS         16
SWH        30303.031 Hz
FIDRES     0.462388 Hz
AQ         1.0813940 sec
RG         5792.6
DW         16.500 usec
DE         6.00 usec
TE         298.0 K
D1         0.25000000 sec
d11        0.03000000 sec
D16        0.00020000 sec
d17        0.00019600 sec
MCREST     0.00000000 sec
MCWRR      0.01500000 sec
P2         33.10 usec

***** CHANNEL f1 *****
NUC1       13C
P1         16.55 usec
P11        500.00 usec
P12        2000.00 usec
PL0        120.00 dB
PL1        -1.00 dB
SFO1       125.7642648 MHz
SF1        2.70 dB
SF2        2.70 dB
SFRAM1     Crp60.0.5.20.1
SFRAM2     Crp60comp.4
SFOFF1     0.00 Hz
SFOFF2     0.00 Hz

***** CHANNEL f2 *****
CPDPRG2   waltz16
NUC2       1H
PCPD2     100.00 usec
PL2       1.60 dB
PL12      24.50 dB
SFO2      500.2225011 MHz

***** GRADIENT CHANNEL *****
GRNAM1    SINE.100
GRNAM2    SINE.100
GPX1      0.00 %
GPX2      0.00 %
GPY1      0.00 %
GPY2      0.00 %
GZ1       30.00 %
GZ2       50.00 %
p15       500.00 usec
p16       1000.00 usec

F2 - Processing parameters
SI         65536
SF         125.7604085 MHz
WDW        EM
SSB        0
LA         1.00 Hz
GB         0
PC         2.00

1D NMR plot parameters
CX         22.80 cm
CY         60.00 cm
FIP        230.000 ppm
F1         28929.49 Hz
F2P        -10.000 ppm
F2         -1257.80 Hz
F2RCM      10.52532 ppm/cm
HZCM       1324.00439 Hz/cm
    
```

<sup>1</sup>H spectrum

ppm  
 8.04828  
 8.03061  
 7.88039  
 7.86034  
 7.85290  
 7.84771  
 7.84468  
 7.83975  
 7.83578  
 7.83190  
 7.80779  
 7.79932  
 7.79646  
 7.78084  
 7.77787  
 7.44164  
 7.41974  
 7.26147

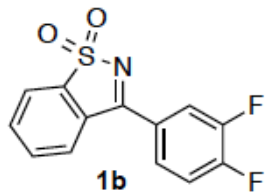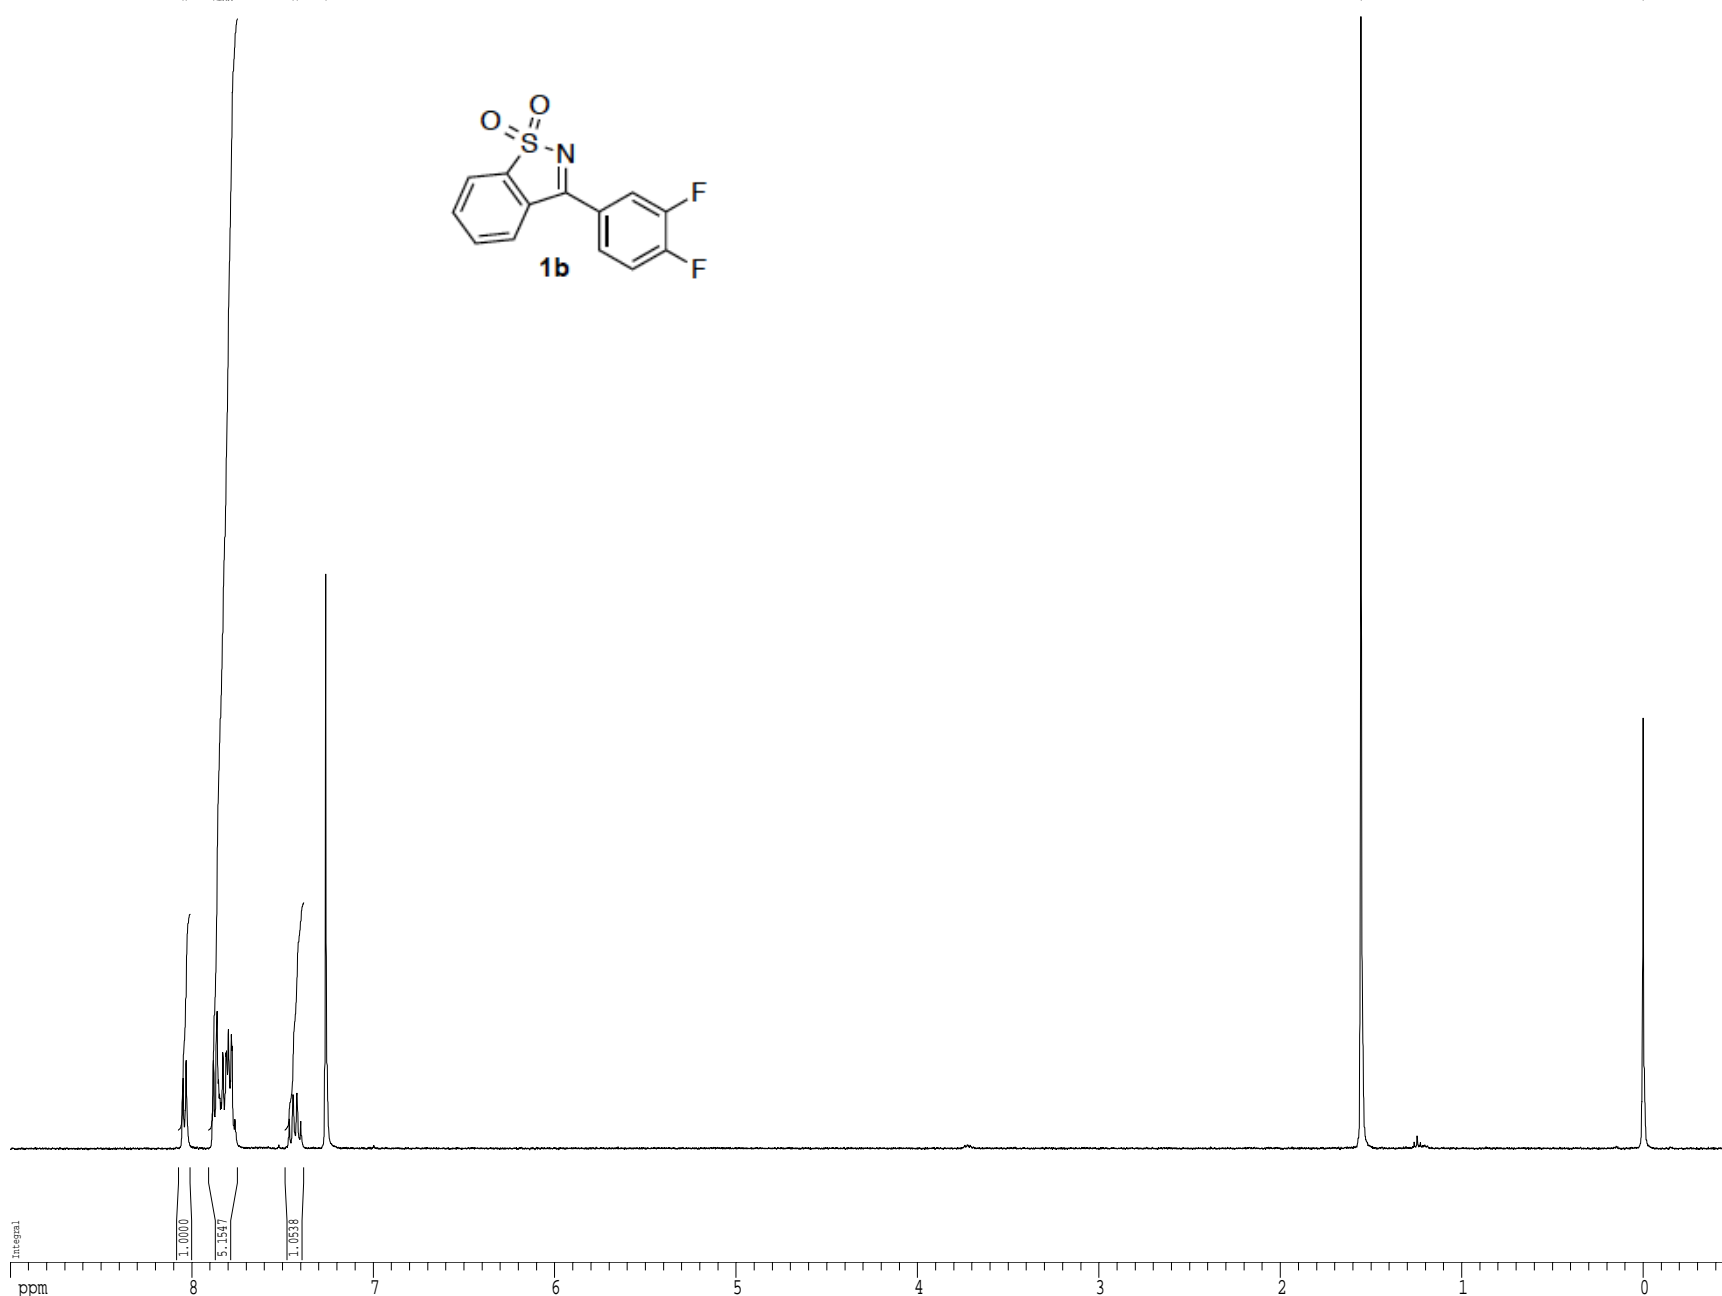

```

Current Data Parameters
USER          enDean
NAME         TBDE-I-5i-recrys
EXPNO        1
PROCNO       1

F2 - Acquisition Parameters
Date_        20141009
Time         11.57
INSTRUM      drx400
PROBHD       5 mm QNP H/P/P
PULPROG      zg30
TD           65536
SOLVENT      CDCl3
NS           8
DS           2
SWH          6410.256 Hz
FIDRES       0.097813 Hz
AQ           5.1118579 sec
RG           1290.2
DW           78.000 usec
DE           4.50 usec
TE           298.0 K
D1           0.10000000 sec
MCREST       0.00000000 sec
MCMRK        0.01500000 sec

===== CHANNEL f1 =====
NUC1         1H
P1           12.00 usec
PL1          0.00 dB
SF01         400.1328009 MHz

F2 - Processing parameters
SI           65536
SF           400.1300201 MHz
WDW          EM
SSB          0
LB           0.30 Hz
GB           0
PC           2.00

1D NMR plot parameters
CX           22.80 cm
CY           15.00 cm
F1P          9.000 ppm
F1           3601.17 Hz
F2P          -0.500 ppm
F2           -200.06 Hz
PPMCM        0.41667 ppm/cm
HZCM         166.72084 Hz/cm
    
```

Z-restored spin-echo 13C spectrum with 1H decoupling

ppm

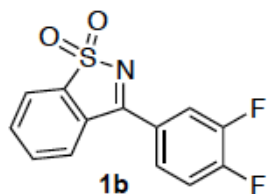

168.97  
 154.95  
 154.85  
 152.90  
 152.80  
 151.91  
 151.80  
 149.90  
 149.80  
 141.26  
 134.00  
 133.91  
 130.03  
 127.45  
 126.75  
 126.72  
 126.69  
 126.26  
 123.59  
 119.27  
 119.12  
 118.80  
 118.66  
 77.41  
 77.16  
 76.91  
 0.14

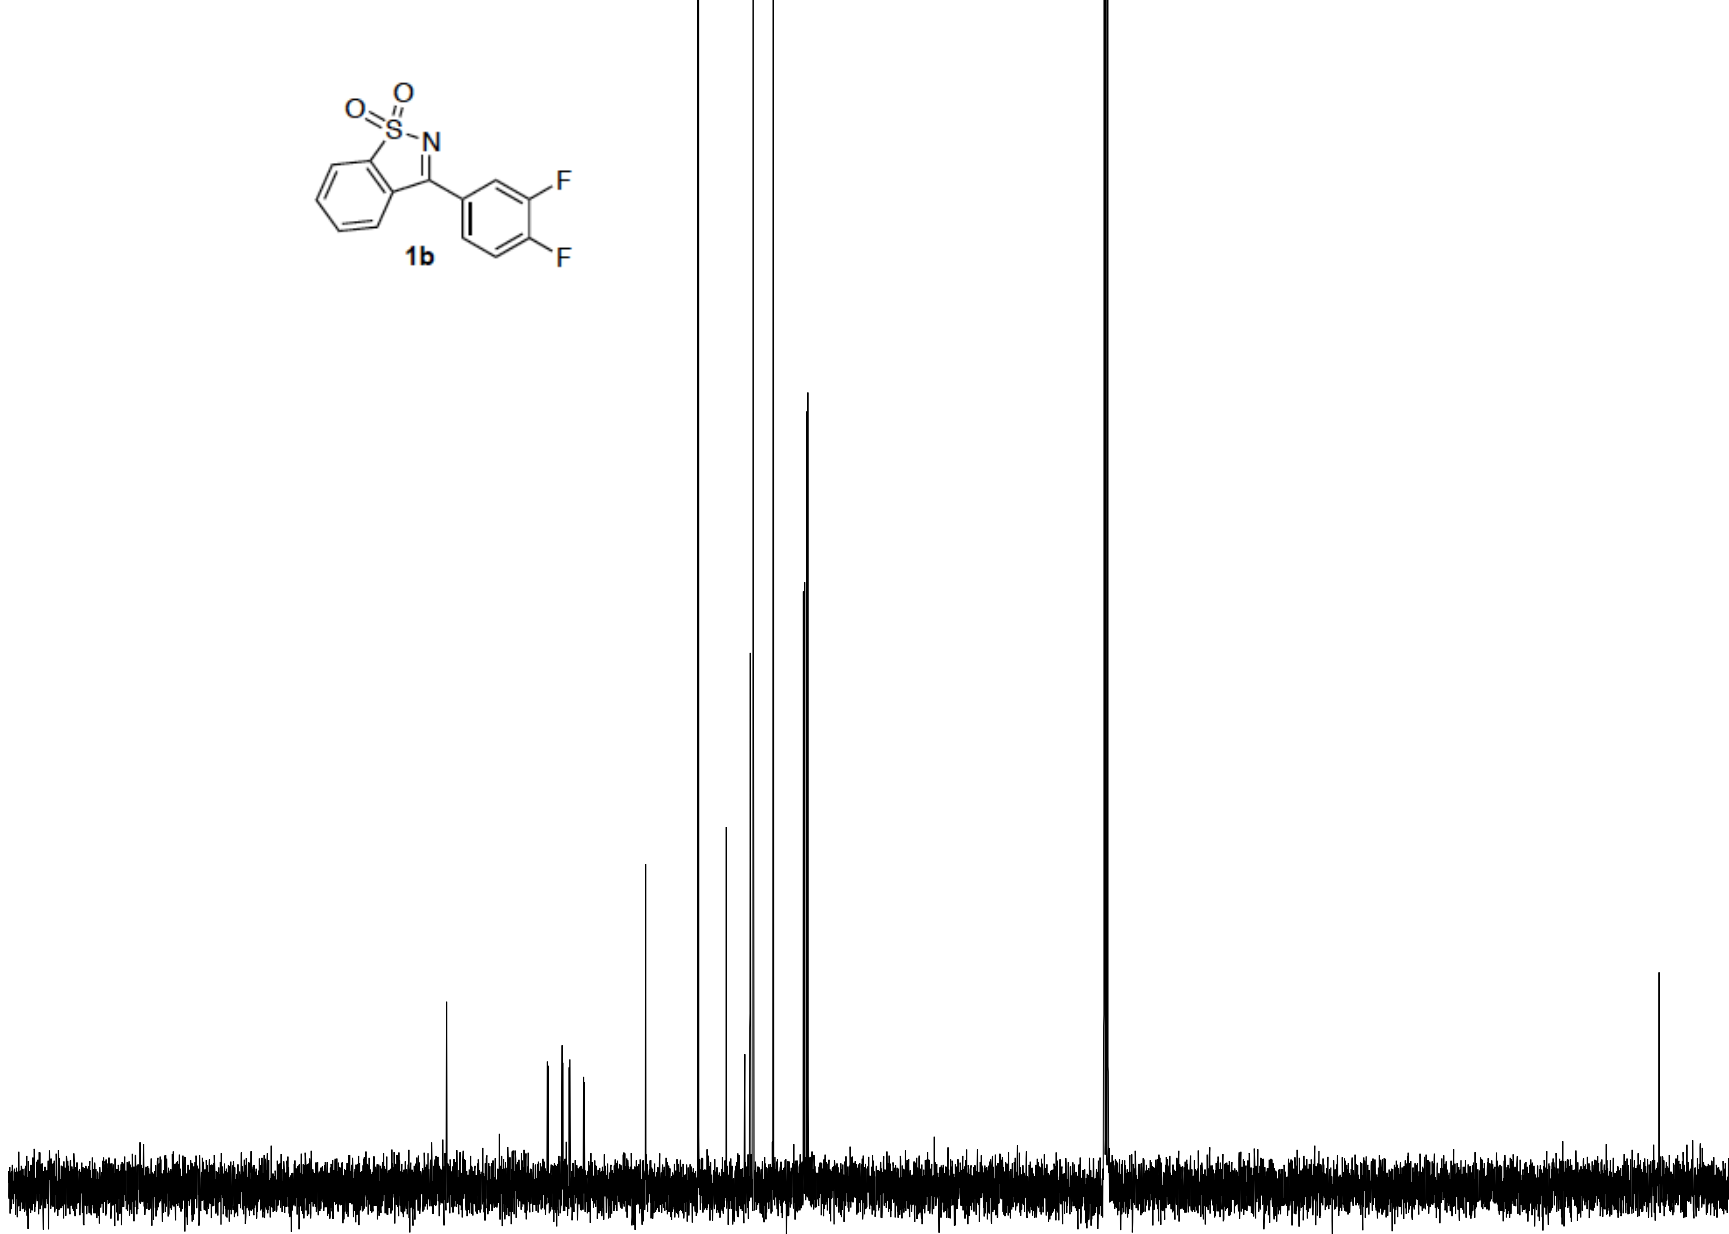

Current Data Parameters  
 USER endean  
 NAME TBDE-1-51-char  
 EXPNO 2  
 PROCNO 1

F2 - Acquisition Parameters  
 Date\_ 20141124  
 Time 13.05  
 INSTRUM cryo500  
 PROBHD 5 mm CPTCI 1H-  
 PULPROG SpinEchopg30gp.prd  
 TD 65536  
 SOLVENT CDCl3  
 NS 1024  
 DS 16  
 SWH 30303.031 Hz  
 FIDRES 0.462388 Hz  
 AQ 1.0813940 sec  
 RG 2298.8  
 DW 16.500 usec  
 DE 6.00 usec  
 TE 298.0 K  
 D1 0.25000000 sec  
 d11 0.03000000 sec  
 D16 0.00020000 sec  
 d17 0.00019600 sec  
 MCREST 0.00000000 sec  
 MCONK 0.01500000 sec  
 P2 33.10 usec

\*\*\*\*\* CHANNEL f1 \*\*\*\*\*  
 NUC1 13c  
 P1 16.55 usec  
 P11 500.00 usec  
 P12 2000.00 usec  
 PL0 120.00 dB  
 PL1 -1.00 dB  
 SFO1 125.7942548 MHz  
 SF1 2.70 dB  
 SF2 2.70 dB  
 SFOAM1 Crp60,0.5,20.1  
 SFOAM2 Crp60comp,4  
 SPOFF1 0.00 Hz  
 SPOFF2 0.00 Hz

\*\*\*\*\* CHANNEL f2 \*\*\*\*\*  
 CPDPRG2 waltz16  
 NUC2 1H  
 PCPD2 100.00 usec  
 PL2 1.60 dB  
 PL12 24.50 dB  
 SFO2 500.2225011 MHz

\*\*\*\*\* GRADIENT CHANNEL \*\*\*\*\*  
 GENAM1 SINE.100  
 GENAM2 SINE.100  
 GFX1 0.00 %  
 GFX2 0.00 %  
 GPY1 0.00 %  
 GPY2 0.00 %  
 GPZ1 30.00 %  
 GPZ2 50.00 %  
 p15 500.00 usec  
 p16 1000.00 usec

F2 - Processing parameters  
 SI 65536  
 SF 125.7804099 MHz  
 WDW EM  
 SSB 0  
 LB 1.00 Hz  
 GB 0  
 PC 2.00

ID NMR plot parameters  
 CX 22.80 cm  
 CY 60.00 cm  
 F1P 230.000 ppm  
 F1 28929.49 Hz  
 F2P -10.000 ppm  
 F2 -1257.80 Hz  
 PPMCM 10.52632 ppm/cm  
 HZCM 1324.00439 Hz/cm

<sup>19</sup>F spectrum

ppm

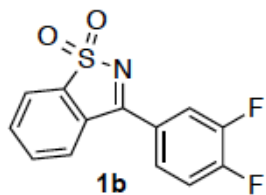

-128.31  
 -128.32  
 -128.34  
 -128.35  
 -128.37  
 -128.38  
 -128.39  
 -128.41  
 -128.42  
 -134.22  
 -134.25  
 -134.28  
 -134.30  
 -134.33

```

Current Data Parameters
USER      endean
NAME      TBDE-I-51-char
EXPNO     4
PROCNO    1

F2 - Acquisition Parameters
Date_     20141124
Time      14.03
INSTRUM   drx400
PROBHD    5 mm QNP H/F/P
PULPROG   zgfg30
TD         65536
SOLVENT   CDCl3
NS         96
DS         2
SWH        75187.969 Hz
FIDRES     1.147277 Hz
AQ         0.4358644 sec
RG         2298.8
DW         6.650 usec
DE         9.46 usec
TE         298.0 K
D1         2.0000000 sec

===== CHANNEL f1 =====
NUC1       19F
P1         22.50 usec
PL1        -6.00 dB
SF01       376.4646491 MHz

F2 - Processing parameters
SI         65536
SF         376.4984640 MHz
WDW        EM
SSB        0
LB         1.00 Hz
GB         0
PC         1.00

1D NMR plot parameters
CX         22.80 cm
CY         15.00 cm
F1P        10.000 ppm
F1         3764.99 Hz
F2P        -190.000 ppm
F2         -71534.71 Hz
PFMCM      8.77193 ppm/cm
HZCM       3302.61841 Hz/cm
  
```

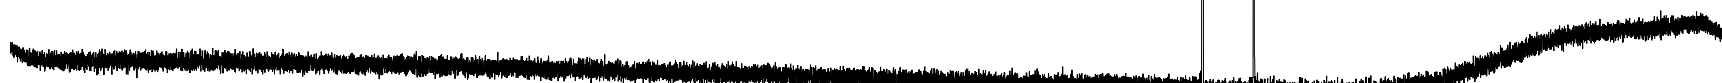

ppm 0 -20 -40 -60 -80 -100 -120 -140 -160 -180

<sup>1</sup>H spectrum

ppm  
 8.0409  
 7.8671  
 7.8671  
 7.8077  
 7.8662  
 7.8511  
 7.8352  
 7.8205  
 7.8059  
 7.7911  
 7.7760  
 7.7610  
 7.6849  
 7.6688  
 7.5844  
 7.5687  
 7.5528  
 7.2617

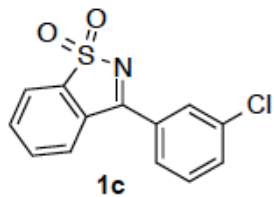

1.5492

-0.0000

Current Data Parameters  
 USER endean  
 NAME T806-1-81-characterization  
 EXPNO 1  
 PROCNO 1

F2 - Acquisition Parameters  
 Date\_ 20141116  
 Time 16.44  
 INSTRUM cryo500  
 PROBD 5 mm CPY1 1H-  
 PULPROG zg30  
 TD 81728  
 SOLVENT CDCl3  
 NS 8  
 DS 2  
 SWH 8012.820 Hz  
 FIDRES 0.098043 Hz  
 AQ 5.0998774 sec  
 RG 4.3  
 DW 62.400 usec  
 DE 6.00 usec  
 TE 298.0 K  
 D1 0.1000000 sec  
 MCREST 0.0000000 sec  
 MCWEX 0.0150000 sec

\*\*\*\*\* CHANNEL f1 \*\*\*\*\*  
 NUC1 1H  
 P1 7.50 usec  
 PL1 1.60 dB  
 SFO1 500.2235015 MHz

F2 - Processing parameters  
 SI 65536  
 SF 500.2200326 MHz  
 WDW EM  
 SSB 0  
 LB 0.30 Hz  
 GB 0  
 PC 4.00

1D NMR plot parameters  
 CY 22.80 cm  
 CY 15.00 cm  
 FIP 9.000 ppm  
 FI 4501.98 Hz  
 FQP -0.500 ppm  
 FZ -250.11 Hz  
 FPMCM 0.41667 ppm/cm  
 HCM 208.42302 Hz/cm

Integral  
 1.0000  
 0.9934  
 1.8717  
 1.9815  
 1.0245  
 1.0698

ppm  
 8  
 7  
 6  
 5  
 4  
 3  
 2  
 1  
 0

Z-restored spin-echo 13C spectrum with 1H decoupling

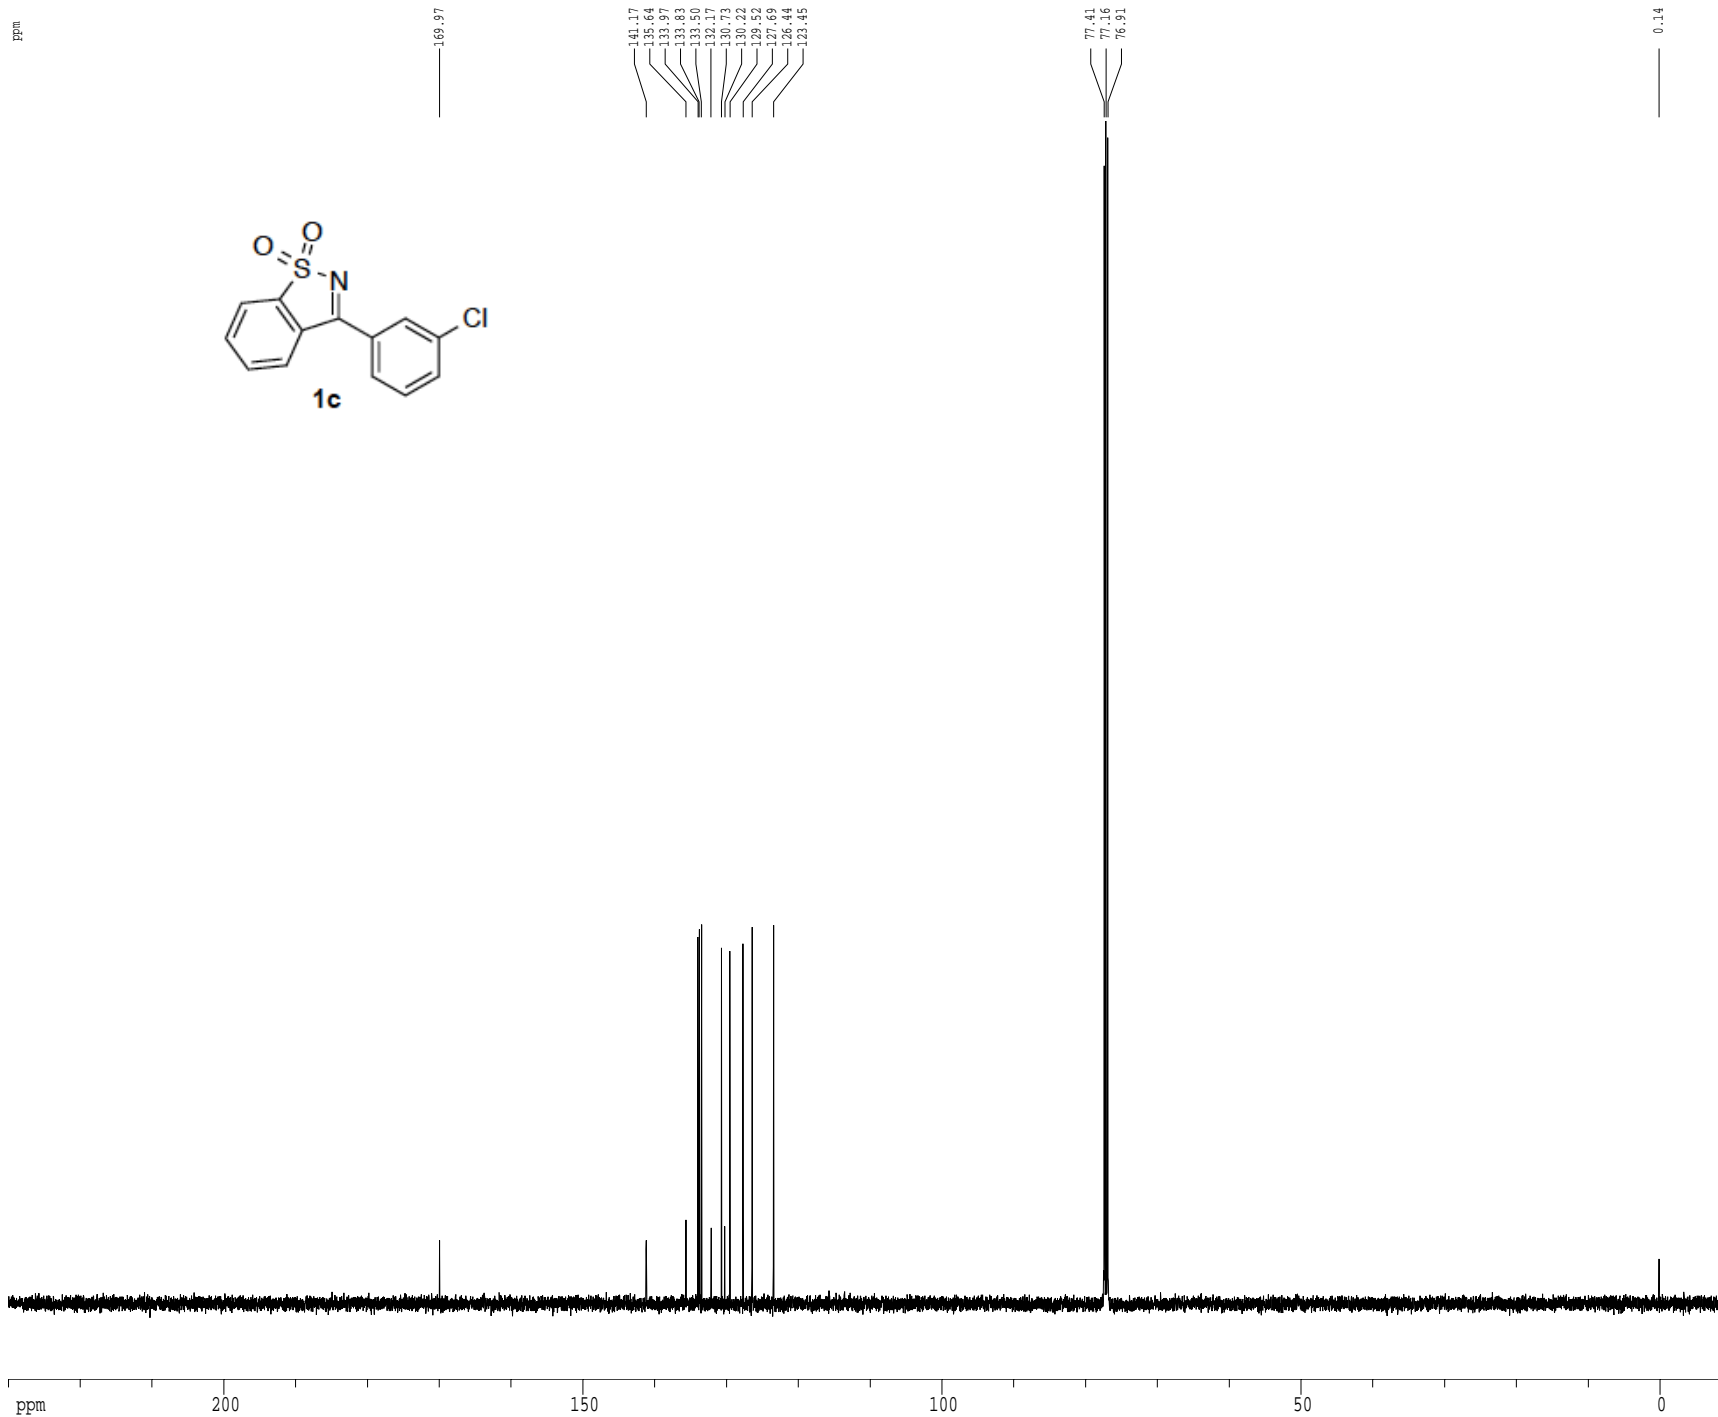

```

Current Data Parameters
NAME      endean
EXPNO     TR08-1-81-characterization
PROCNO    2
          1

F2 - Acquisition Parameters
Date_     20141116
Time      16.54
INSTRUM   cryo500
PROBHD    5 mm CPY11 1H-
PULPROG   SpinEcho30p.prd
TD         65536
SOLVENT   CDCl3
NS         840
DS         16
SWH        30303.031 Hz
FIDRES     0.462388 Hz
AQ         1.0813940 sec
RG         7298.2
DW         16.500 usec
DE         6.00 usec
TE         298.0 K
D1         0.25000000 sec
d11        0.03000000 sec
D16        0.00020000 sec
d17        0.00019600 sec
MCREST     0.00000000 sec
MCWRR      0.01500000 sec
P2         33.10 usec

***** CHANNEL f1 *****
NUC1        13C
P1          16.55 usec
P11         500.00 usec
P12         2000.00 usec
PL0         120.00 dB
PL1         -1.00 dB
SFO1        125.7642648 MHz
SF1         2.70 dB
SF2         2.70 dB
SFRAM1      Crp60.0.5.20.1
SFRAM2      Crp60comp.4
SFOFF1      0.00 Hz
SFOFF2      0.00 Hz

***** CHANNEL f2 *****
CPDPRG2    waltz16
NUC2        1H
PCPD2      100.00 usec
PL2         1.60 dB
PL12        24.50 dB
SFO2        500.2225011 MHz

***** GRADIENT CHANNEL *****
GRNAM1     SINE.100
GRNAM2     SINE.100
GFX1       0.00 %
GFX2       0.00 %
GFY1       0.00 %
GFY2       0.00 %
GFZ1       30.00 %
GFZ2       50.00 %
p15        500.00 usec
p16        1000.00 usec

F2 - Processing parameters
SI         65536
SF         125.7604099 MHz
WDW        EM
SSB        0
LA         1.00 Hz
GB         0
PC         2.00

1D NMR plot parameters
CX         22.80 cm
CY         15.65 cm
FIP        230.000 ppm
F1         28929.49 Hz
F2P        -10.000 ppm
F2         -1257.80 Hz
F0FCM      10.52532 ppm/cm
HZCM       1324.00439 Hz/cm
    
```



<sup>1</sup>H spectrum

ppm  
 8.2248  
 8.1525  
 8.1455  
 8.0457  
 8.0415  
 8.0316  
 8.0294  
 7.9649  
 7.9493  
 7.8470  
 7.8430  
 7.8293  
 7.8271  
 7.8174  
 7.8152  
 7.8005  
 7.7962  
 7.7938  
 7.7891  
 7.7872  
 7.7833  
 7.7767  
 7.7711  
 7.7653  
 7.7584  
 7.7561  
 7.7513

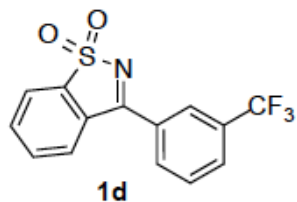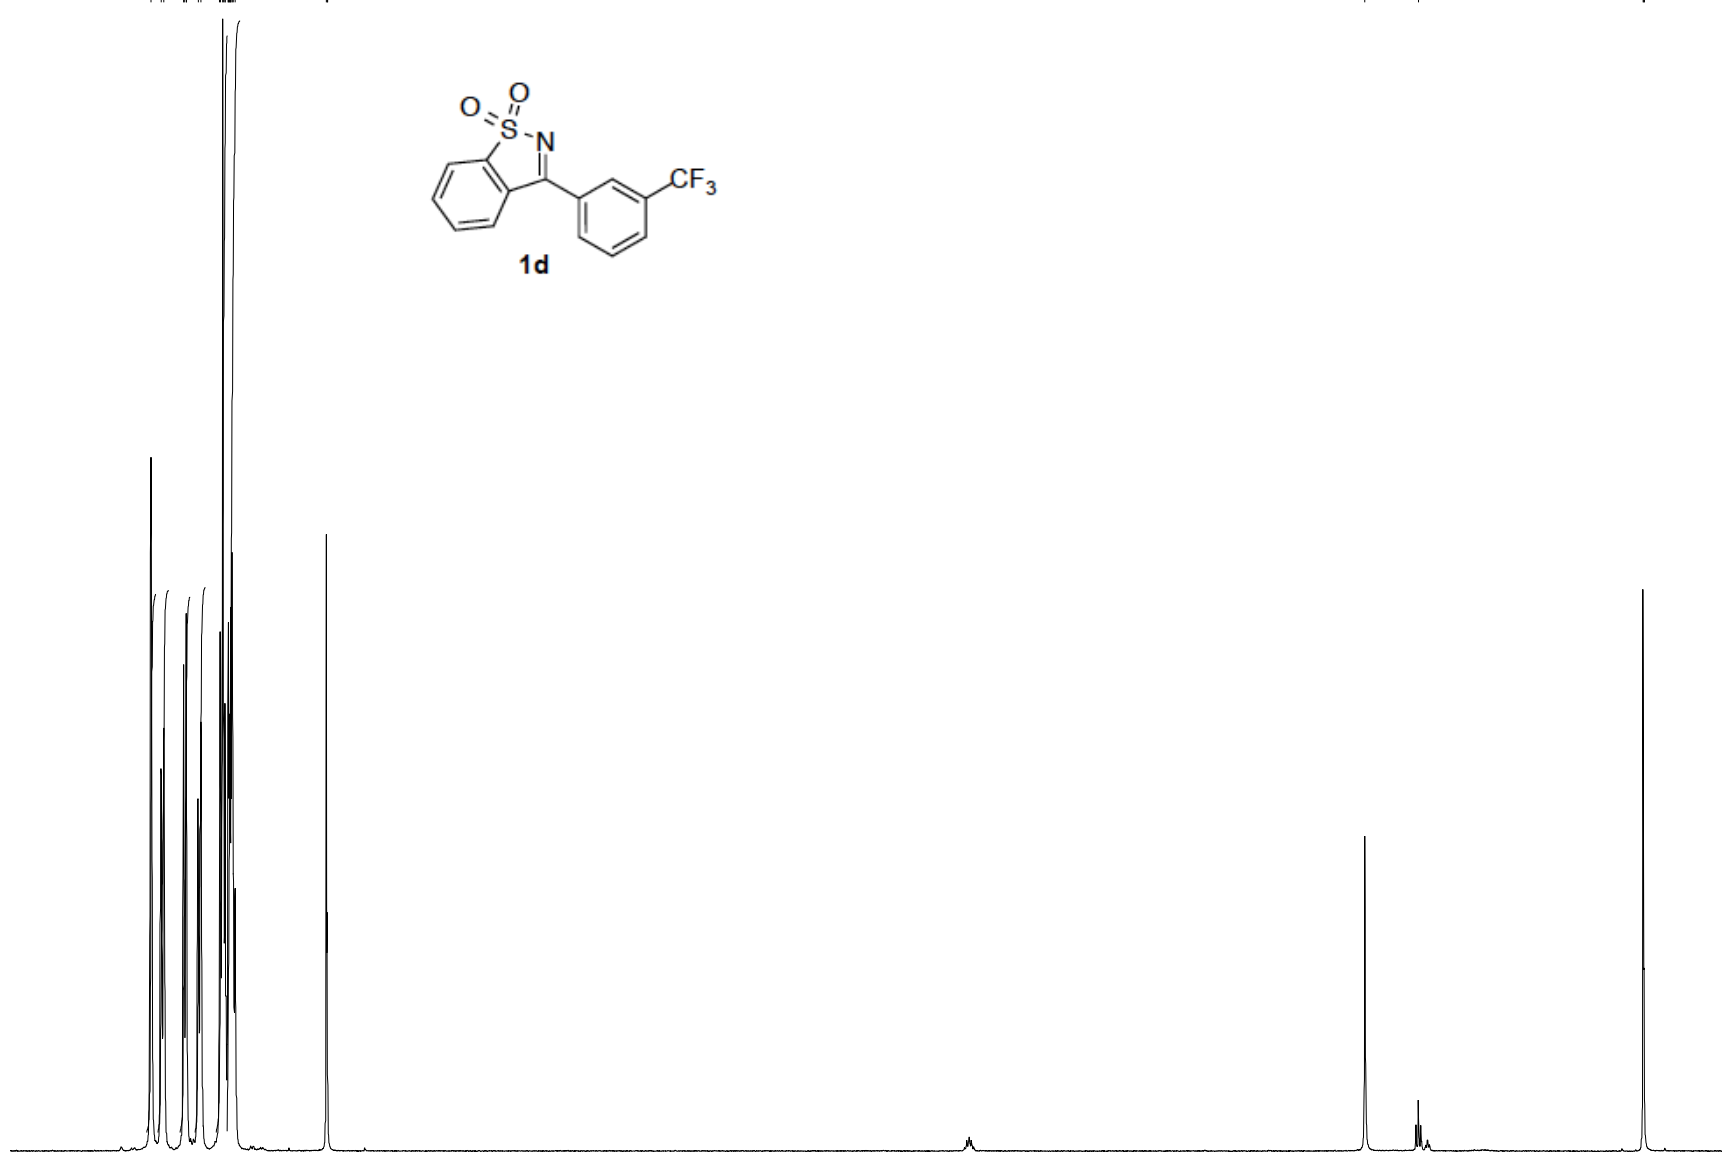

Integral  
 1.0000  
 1.0075  
 0.9948  
 1.0128  
 2.0391  
 2.0672

1.5341  
 1.2387  
 -0.0000  
 -0.0042  
 -0.0069

Current Data Parameters  
 USER osborn  
 NAME CAO-III-26-pure  
 EXPNO 1  
 PROCNO 1

F2 - Acquisition Parameters  
 Date\_ 20140818  
 Time 11.59  
 INSTRUM cryo500  
 PROBHD 5 mm CPTCI 1H-  
 PULPROG zg30  
 TD 81728  
 SOLVENT CDCl3  
 NS 8  
 DS 2  
 SWH 8012.820 Hz  
 FIDRES 0.098043 Hz  
 AQ 5.0998774 sec  
 RG 6.3  
 DW 62.400 usec  
 DE 6.00 usec  
 TE 310.0 K  
 DL 0.10000000 sec  
 MCREST 0.00000000 sec  
 MCWRR 0.01500000 sec

===== CHANNEL f1 =====  
 NUC1 1H  
 P1 7.50 usec  
 PL1 1.60 dB  
 SF01 500.2235015 MHz

F2 - Processing parameters  
 SI 65536  
 SF 500.2200319 MHz  
 WDW EM  
 SSB 0  
 LB 0.30 Hz  
 GB 0  
 PC 4.00

1D NMR plot parameters  
 CX 22.80 cm  
 CY 15.00 cm  
 F1P 9.000 ppm  
 F1 4501.98 Hz  
 F2P -0.500 ppm  
 F2 -250.11 Hz  
 PPMCM 0.41667 ppm/cm  
 HZCM 208.42502 Hz/cm

Z-restored spin-echo 13C spectrum with 1H decoupling

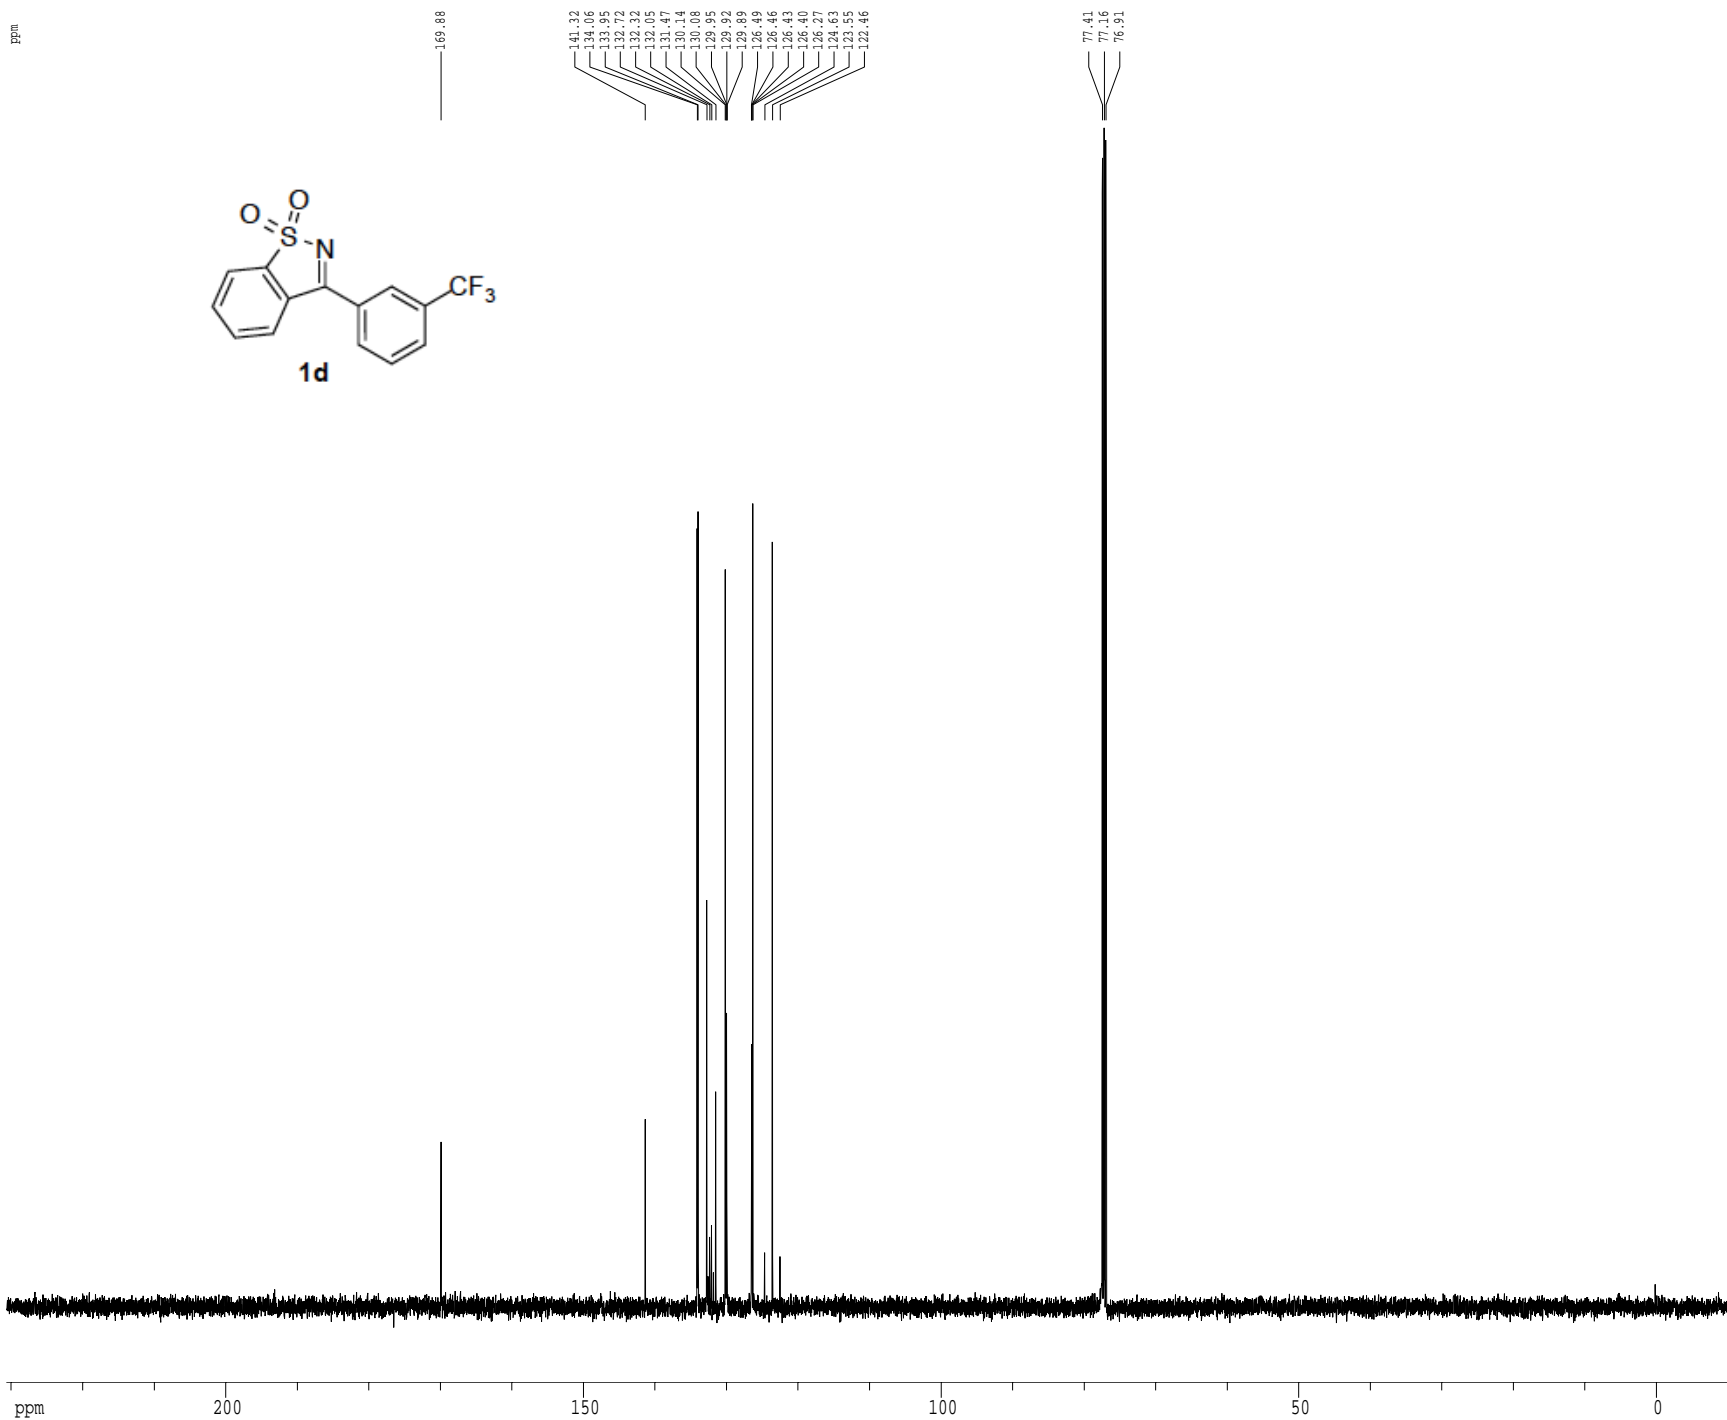

```

Current Data Parameters
USER      osborn
NAME      CAO-III-26-pure
EXPNO     2
PROCNO    1

F2 - Acquisition Parameters
Date_     20140818
Time      12.01
INSTRUM   cryo500
PROBHD    5 mm CPTCI 1H-
PULPROG   SpinEchopg30gp.prd
TD         65536
SOLVENT   CDCl3
NS         331
DS         16
SWH        30303.031 Hz
FIDRES     0.462388 Hz
AQ         1.0813940 sec
RG         8192
DW         16.500 usec
DE         6.00 usec
TE         310.0 K
D1         0.25000000 sec
d11        0.03000000 sec
d16        0.00020000 sec
d17        0.00019600 sec
MCREST     0.00000000 sec
MCONRXX    0.01500000 sec
P2         31.00 usec

===== CHANNEL f1 =====
NUC1       13c
P1         15.50 usec
P11        500.00 usec
P12        2000.00 usec
PL0        120.00 dB
PL1        -1.00 dB
SFO1       125.7942548 MHz
SF1        3.20 dB
SPNAM1     Crp60,0.5,20.1
SPNAM2     Crp60comp,4
SFOFF1     0.00 Hz
SFOFF2     0.00 Hz

===== CHANNEL f2 =====
CPDPRG2    waltz16
NUC2       1H
PCPD2     100.00 usec
PL2       1.60 dB
PL12      24.60 dB
SFO2      500.2225011 MHz

===== GRADIENT CHANNEL =====
GENAM1     SINE.100
GENAM2     SINE.100
GFX1       0.00 %
GFX2       0.00 %
GPY1       0.00 %
GPY2       0.00 %
GPZ1       30.00 %
GPZ2       50.00 %
p15        500.00 usec
p16        1000.00 usec

F2 - Processing parameters
SI         65536
SF         125.7804039 MHz
WDW        EM
SSB        0
LB         1.00 Hz
GB         0
PC         2.00

1D NMR plot parameters
CX         22.80 cm
CY         15.65 cm
F1P        230.637 ppm
F1         29009.68 Hz
F2P        -10.287 ppm
F2         -1293.96 Hz
PFMCM      10.56688 ppm/cm
HZCM       1329.10693 Hz/cm
    
```

19F spectrum with 1H decoupling

ppm

-62.868  
-62.874  
-62.883  
-62.889  
-62.896  
-62.902

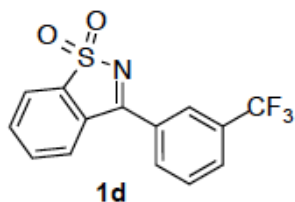

```

Current Data Parameters
USER      osborn
NAME      CAO-III-26-SI
EXNO      2
PROCNO    1

F2 - Acquisition Parameters
Date_     20150530
Time      19.49
INSTRUM   drx400
PROBHD    5 mm QNP H/P/P
PULPROG   zgfhigsn30
TD         65536
SOLVENT   CDCl3
NS         31
DS         4
SWH        75187.969 Hz
FIDRES     1.147277 Hz
AQ          0.4358644 sec
RG          3649.1
DM          6.650 usec
DE          9.46 usec
TE          298.0 K
D1          2.0000000 sec
d11         0.0300000 sec
d12         0.0002000 sec

===== CHANNEL f1 =====
NUC1       19F
P1         22.50 usec
PL1        -6.00 dB
SF01       376.4646491 MHz

===== CHANNEL f2 =====
CPDPRG2    waltz16
NUC2       1H
PCPD2      90.00 usec
PL2        120.00 dB
PL12       17.70 dB
SFO2       400.1320007 MHz

F2 - Processing parameters
SI         65536
SF         376.4983851 MHz
WDW        EM
SSB        0
LB         0.30 Hz
GB         0
PC         1.00

1D NMR plot parameters
CX         22.80 cm
CY         15.00 cm
F1P        1.000 ppm
F1          376.50 Hz
F2P        -190.000 ppm
F2          -71534.70 Hz
PFMCM      8.37719 ppm/cm
HZCM       3153.99976 Hz/cm
    
```

ppm -20 -40 -60 -80 -100 -120 -140 -160 -180

<sup>1</sup>H spectrum

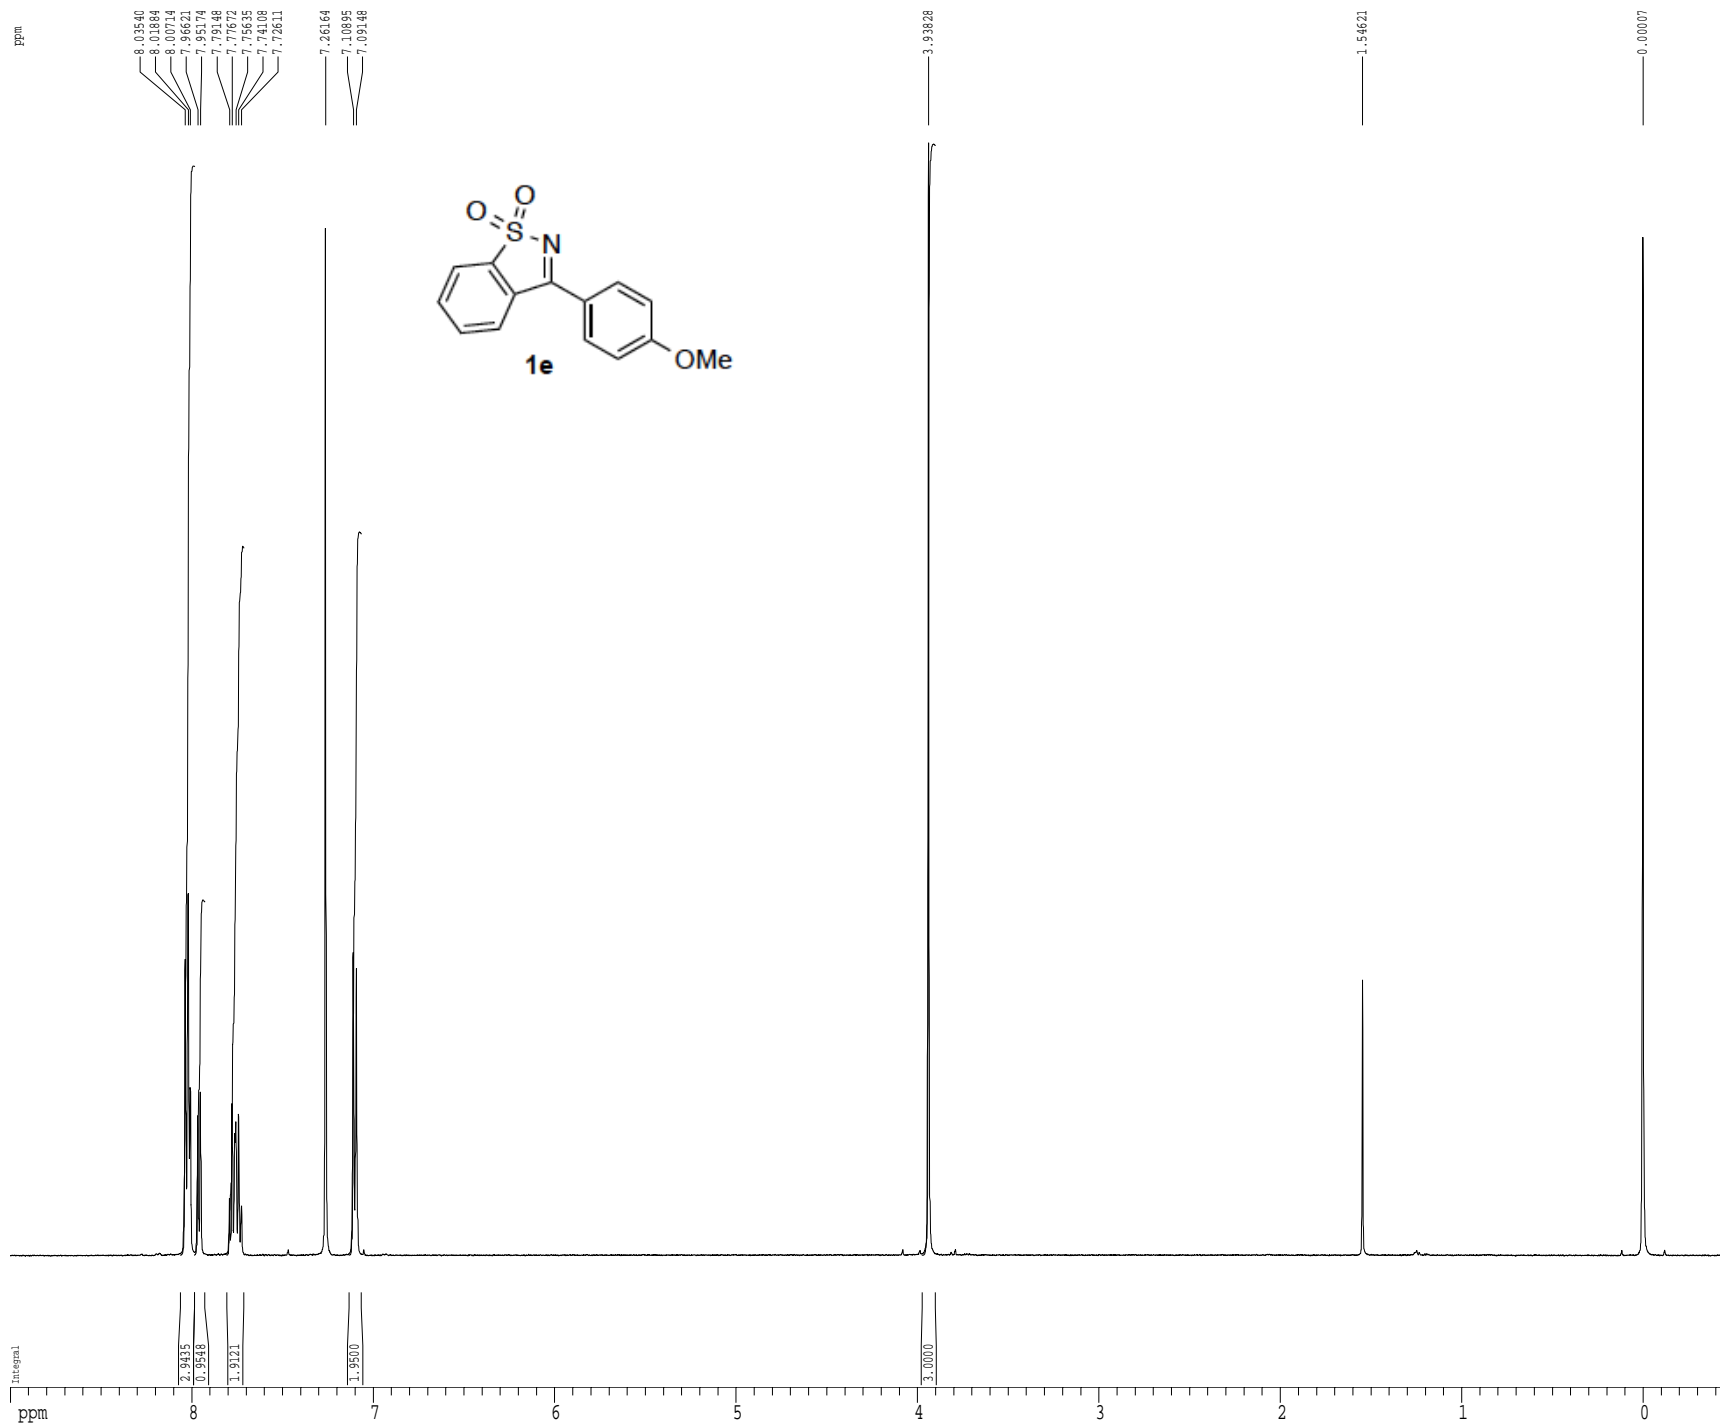

Current Data Parameters  
 USER endean  
 NAME T806-1-47-characterization  
 EXPNO 1  
 PROCNO 1

F2 - Acquisition Parameters  
 Date\_ 2014116  
 Time 15.43  
 INSTRUM cryo500  
 PROBRD 5 mm CPY1 1H-  
 PULPROG zg30  
 TD 81728  
 SOLVENT CDCl3  
 NS 8  
 DS 2  
 SWH 8012.820 Hz  
 FIDRES 0.098043 Hz  
 AQ 5.0998774 sec  
 RG 8.7  
 DW 62.400 usec  
 DE 6.00 usec  
 TE 298.0 K  
 D1 0.1000000 sec  
 MCREST 0.0000000 sec  
 MCWEX 0.0150000 sec

\*\*\*\*\* CHANNEL f1 \*\*\*\*\*  
 NUC1 1H  
 P1 7.50 usec  
 PL1 1.60 dB  
 SFO1 500.2235015 MHz

F2 - Processing parameters  
 SI 65536  
 SF 500.2200330 MHz  
 WDW EM  
 SSB 0  
 LB 0.30 Hz  
 GB 0  
 PC 4.00

1D NMR plot parameters  
 CY 22.80 cm  
 CY 15.00 cm  
 FIP 9.000 ppm  
 F1 4501.98 Hz  
 F2P -0.500 ppm  
 F2 -250.11 Hz  
 FPMCM 0.41667 ppm/cm  
 HZCM 208.42302 Hz/cm

Z-restored spin-echo 13C spectrum with 1H decoupling

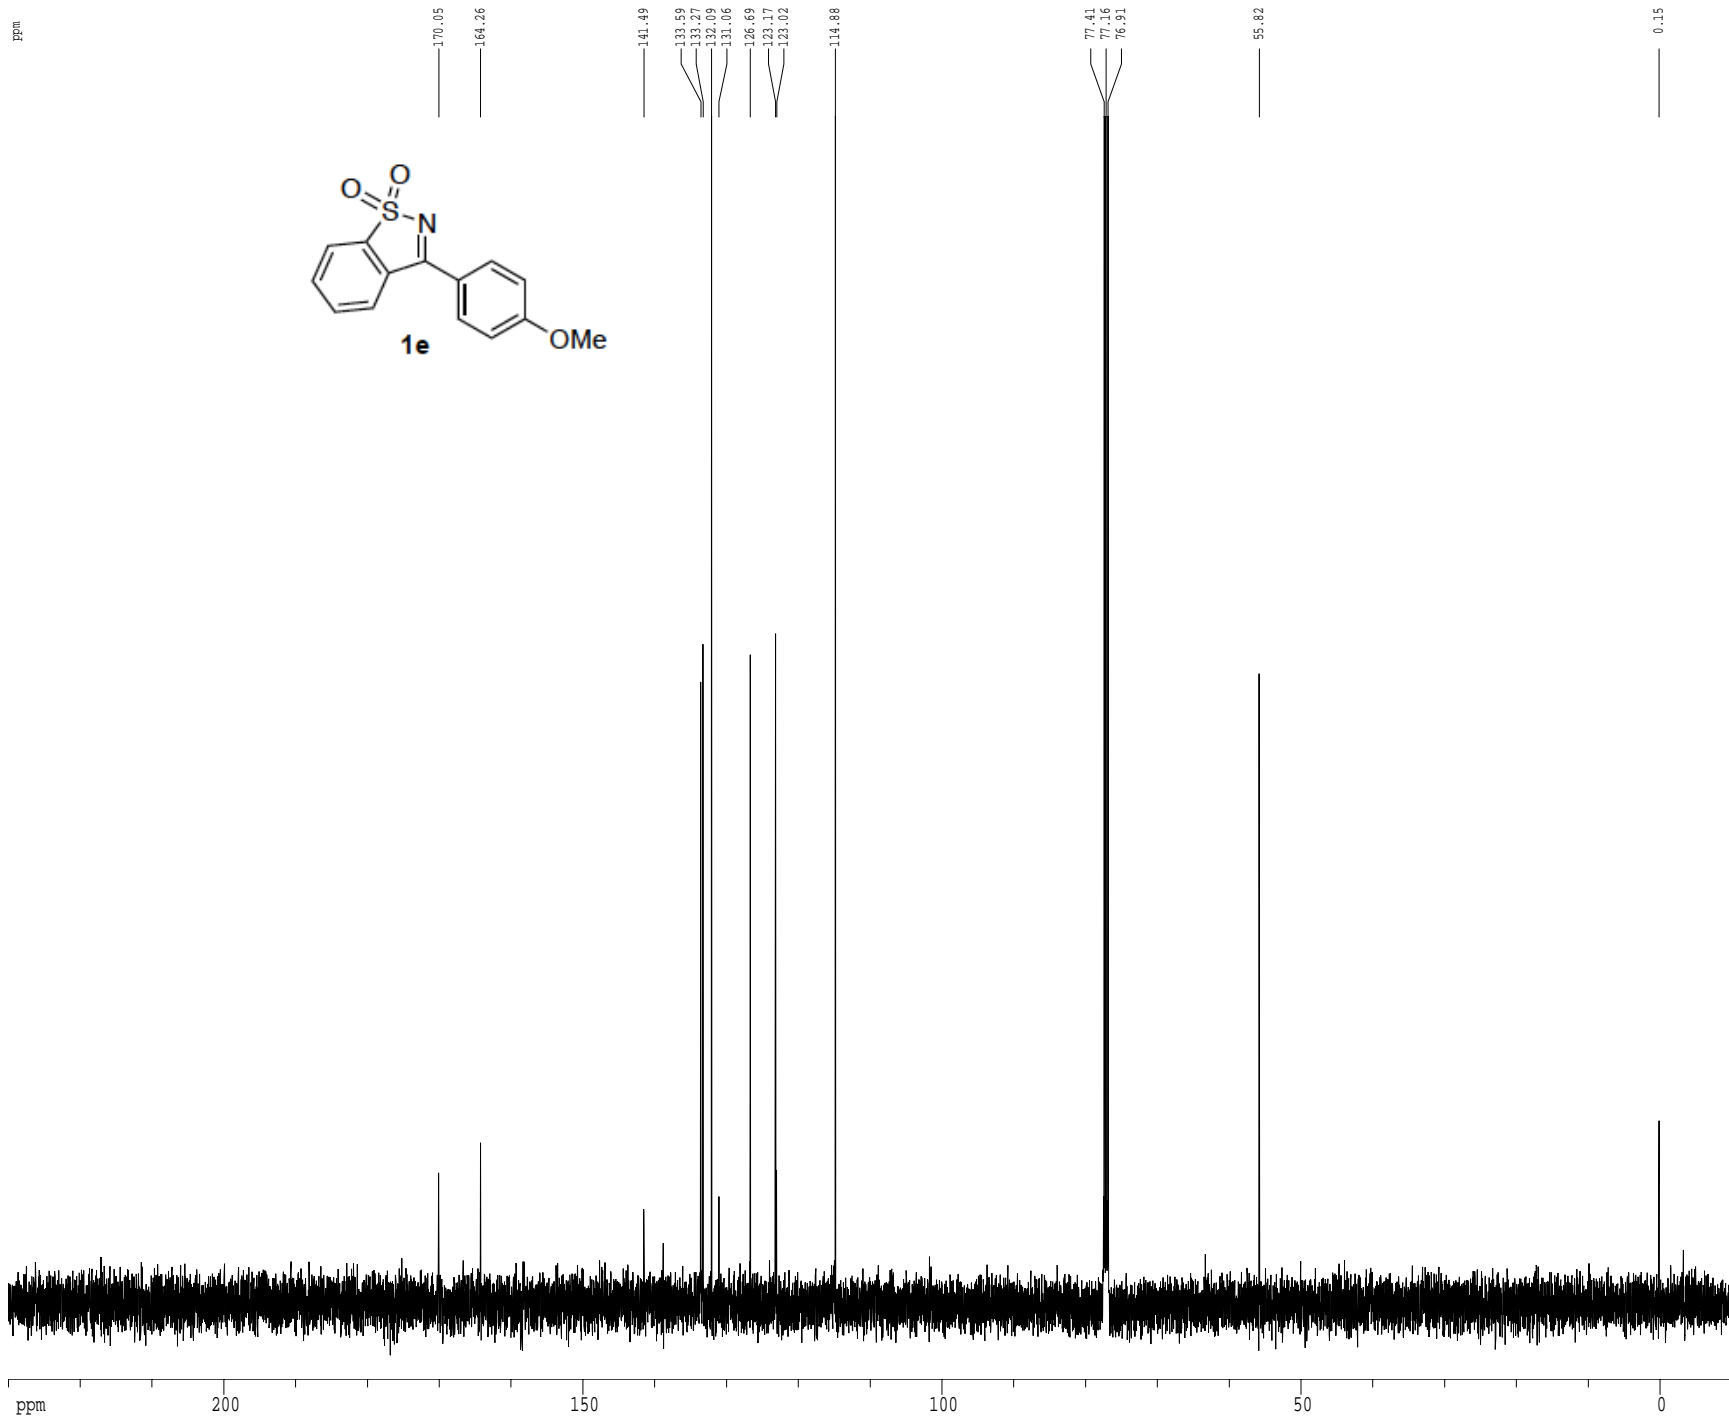

```

Current Data Parameters
NAME      endean
EXPNO     2
PROCNO    1

F2 - Acquisition Parameters
Date_     20141116
Time      15.53
INSTRUM   cryo500
PROBHD    5 mm CPXI 1H-
PULPROG   SpinEcho30p.prd
TD         65536
SOLVENT   CDCl3
NS         1024
DS         16
SWH        30303.031 Hz
FIDRES     0.462388 Hz
AQ         1.0813940 sec
RG         4096
DW         16.500 usec
DE         6.00 usec
TE         298.0 K
D1         0.25000000 sec
d11        0.03000000 sec
D16        0.00020000 sec
d17        0.00019000 sec
MCREST     0.00000000 sec
MCWRR      0.01500000 sec
F2         33.10 usec

***** CHANNEL f1 *****
NUC1       13C
P1         16.55 usec
P11        500.00 usec
P12        2000.00 usec
PL0        120.00 dB
PL1        -1.00 dB
SFO1       125.7642648 MHz
SF1        2.70 dB
SF2        2.70 dB
SFRAM1     Crp60.0.5.20.1
SFRAM2     Crp60comp.4
SFOFF1     0.00 Hz
SFOFF2     0.00 Hz

***** CHANNEL f2 *****
CPDPRG2    waltz16
NUC2       1H
PCPD2     100.00 usec
PL2        1.60 dB
PL12       24.50 dB
SFO2       500.2225011 MHz

***** GRADIENT CHANNEL *****
GRNAM1     SINE.100
GRNAM2     SINE.100
GFX1       0.00 %
GFX2       0.00 %
GFY1       0.00 %
GFY2       0.00 %
GFZ1       30.00 %
GFZ2       50.00 %
p15        500.00 usec
p16        1000.00 usec

F2 - Processing parameters
SI         65536
SF         125.7604094 MHz
WDW        EM
SSB        0
LA         1.00 Hz
GB         0
PC         2.00

1D NMR plot parameters
CX         22.80 cm
CY         60.00 cm
FIP        230.000 ppm
F1         28929.49 Hz
F2P        -10.000 ppm
F2         10.52532 ppm/cm
H2CM       1324.00439 Hz/cm
    
```

<sup>1</sup>H spectrum

PPM  
 8.5022  
 8.4935  
 8.4876  
 8.4821  
 8.4759  
 8.4672  
 7.9889  
 7.9840  
 7.9829  
 7.9791  
 7.9778  
 7.9717  
 7.9638  
 7.9114  
 7.7923  
 7.7898  
 7.7834  
 7.7812  
 7.7773  
 7.7746  
 7.7723  
 7.7660  
 7.7573  
 7.7535  
 7.7495  
 6.7923  
 6.7882  
 6.7850

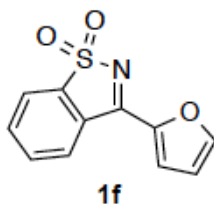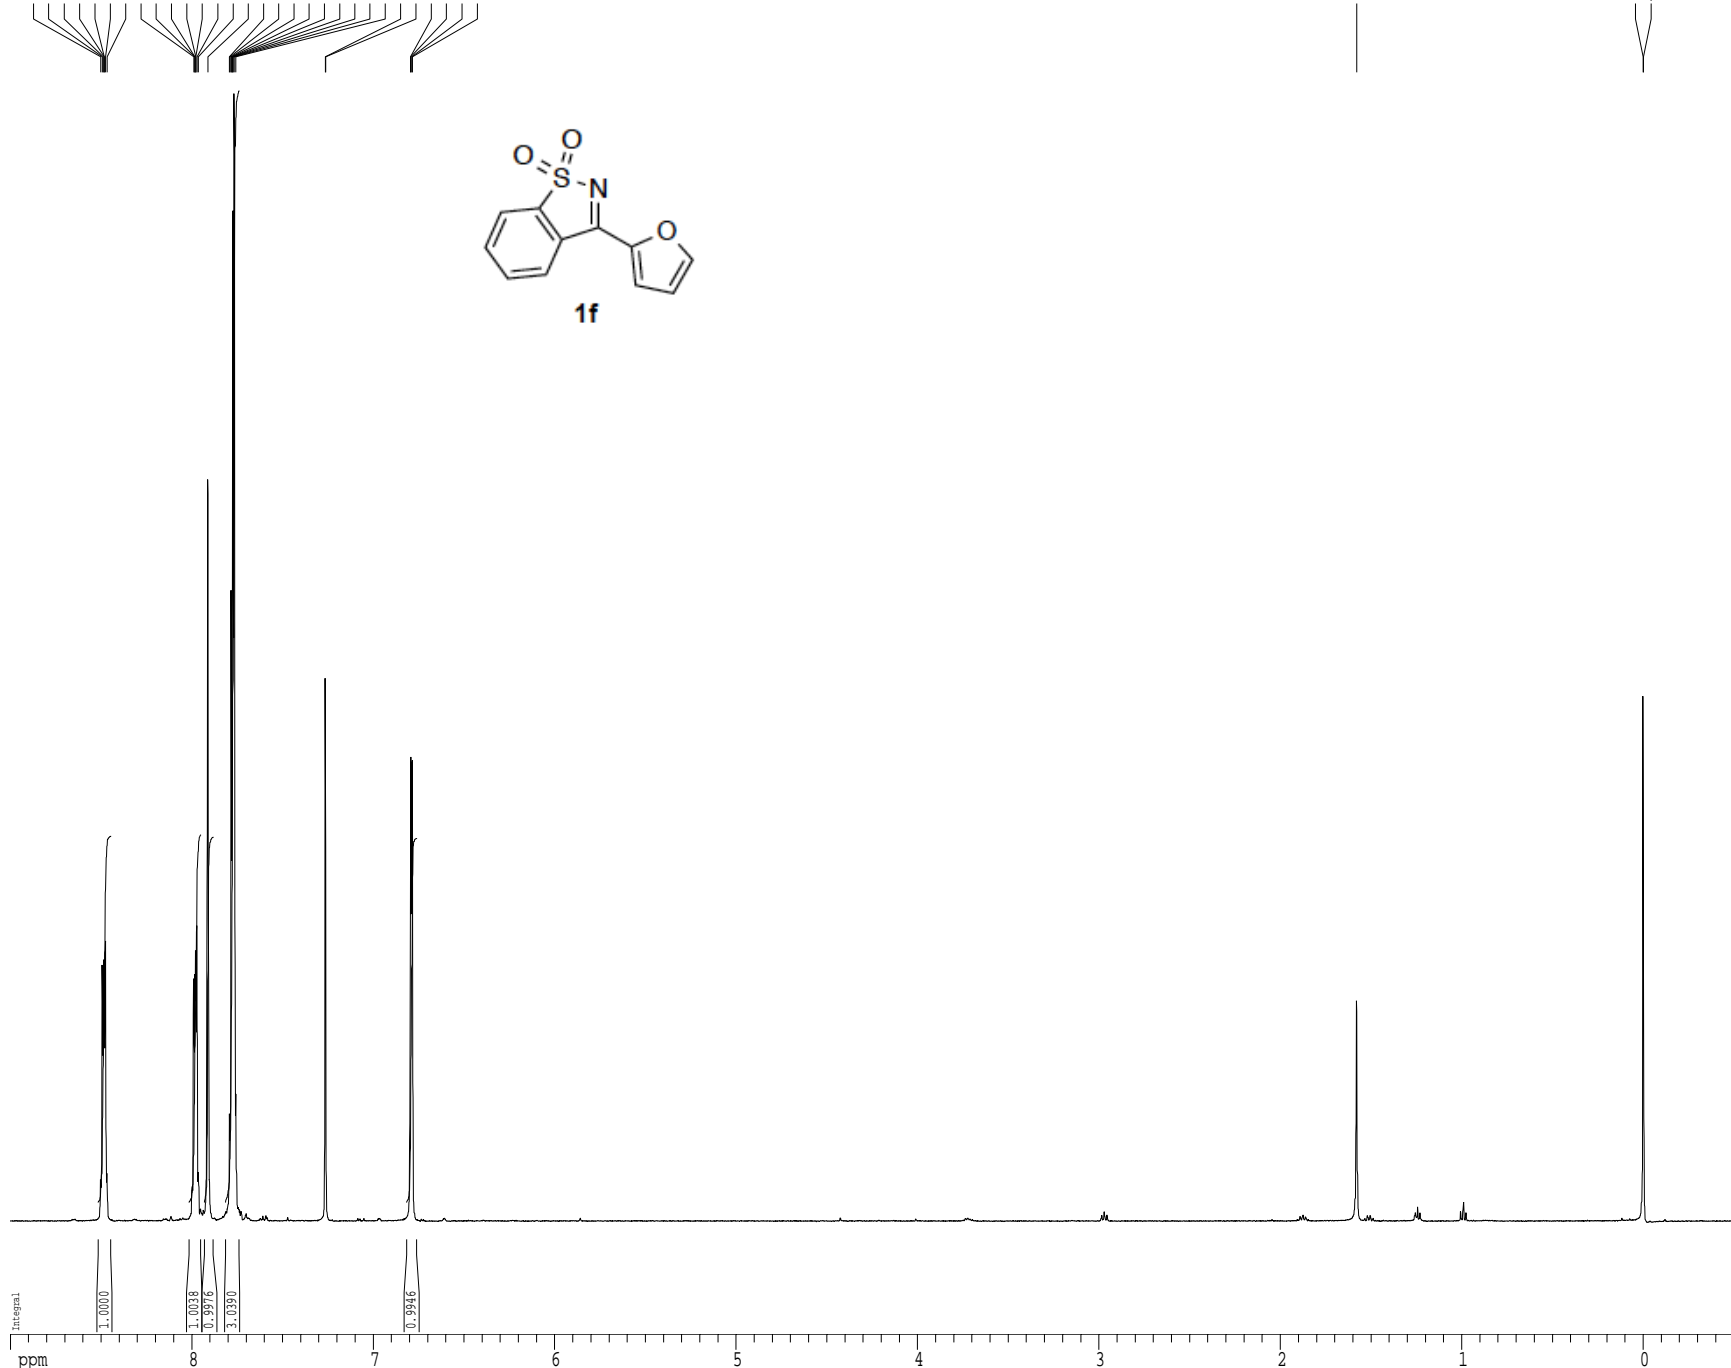

1.5797  
 0.0001  
 -0.0018

Current Data Parameters  
 USER osborn  
 NAME CAO-III-37-pure  
 EXPNO 1  
 PROCNO 1

F2 - Acquisition Parameters  
 Date\_ 20140818  
 Time 13.26  
 INSTRUM cryo500  
 PROBHD 5 mm CPTCI 1H-  
 PULPROG zg30  
 TD 81728  
 SOLVENT CDCl3  
 NS 8  
 DS 2  
 SWH 8012.820 Hz  
 FIDRES 0.098043 Hz  
 AQ 5.0998774 sec  
 RG 6.3  
 DW 62.400 usec  
 DE 6.00 usec  
 TE 298.0 K  
 DL 0.10000000 sec  
 MCREST 0.00000000 sec  
 MCWEX 0.01500000 sec

===== CHANNEL f1 =====  
 NUC1 1H  
 P1 7.50 usec  
 PL1 1.60 dB  
 SF01 500.2235015 MHz

F2 - Processing parameters  
 SI 65536  
 SF 500.2200292 MHz  
 WDW EM  
 SSB 0  
 LB 0.30 Hz  
 GB 0  
 PC 4.00

1D NMR plot parameters  
 CX 22.80 cm  
 CY 15.00 cm  
 F1P 9.000 ppm  
 F1 4501.98 Hz  
 F2P -0.500 ppm  
 F2 -250.11 Hz  
 PPMCM 0.41667 ppm/cm  
 HZCM 208.42502 Hz/cm

Z-restored spin-echo 13C spectrum with 1H decoupling

ppm

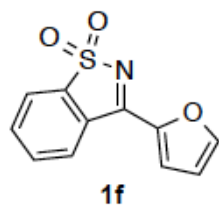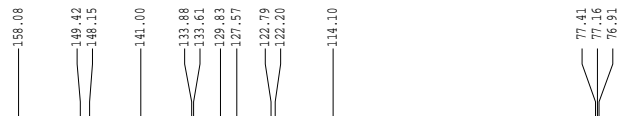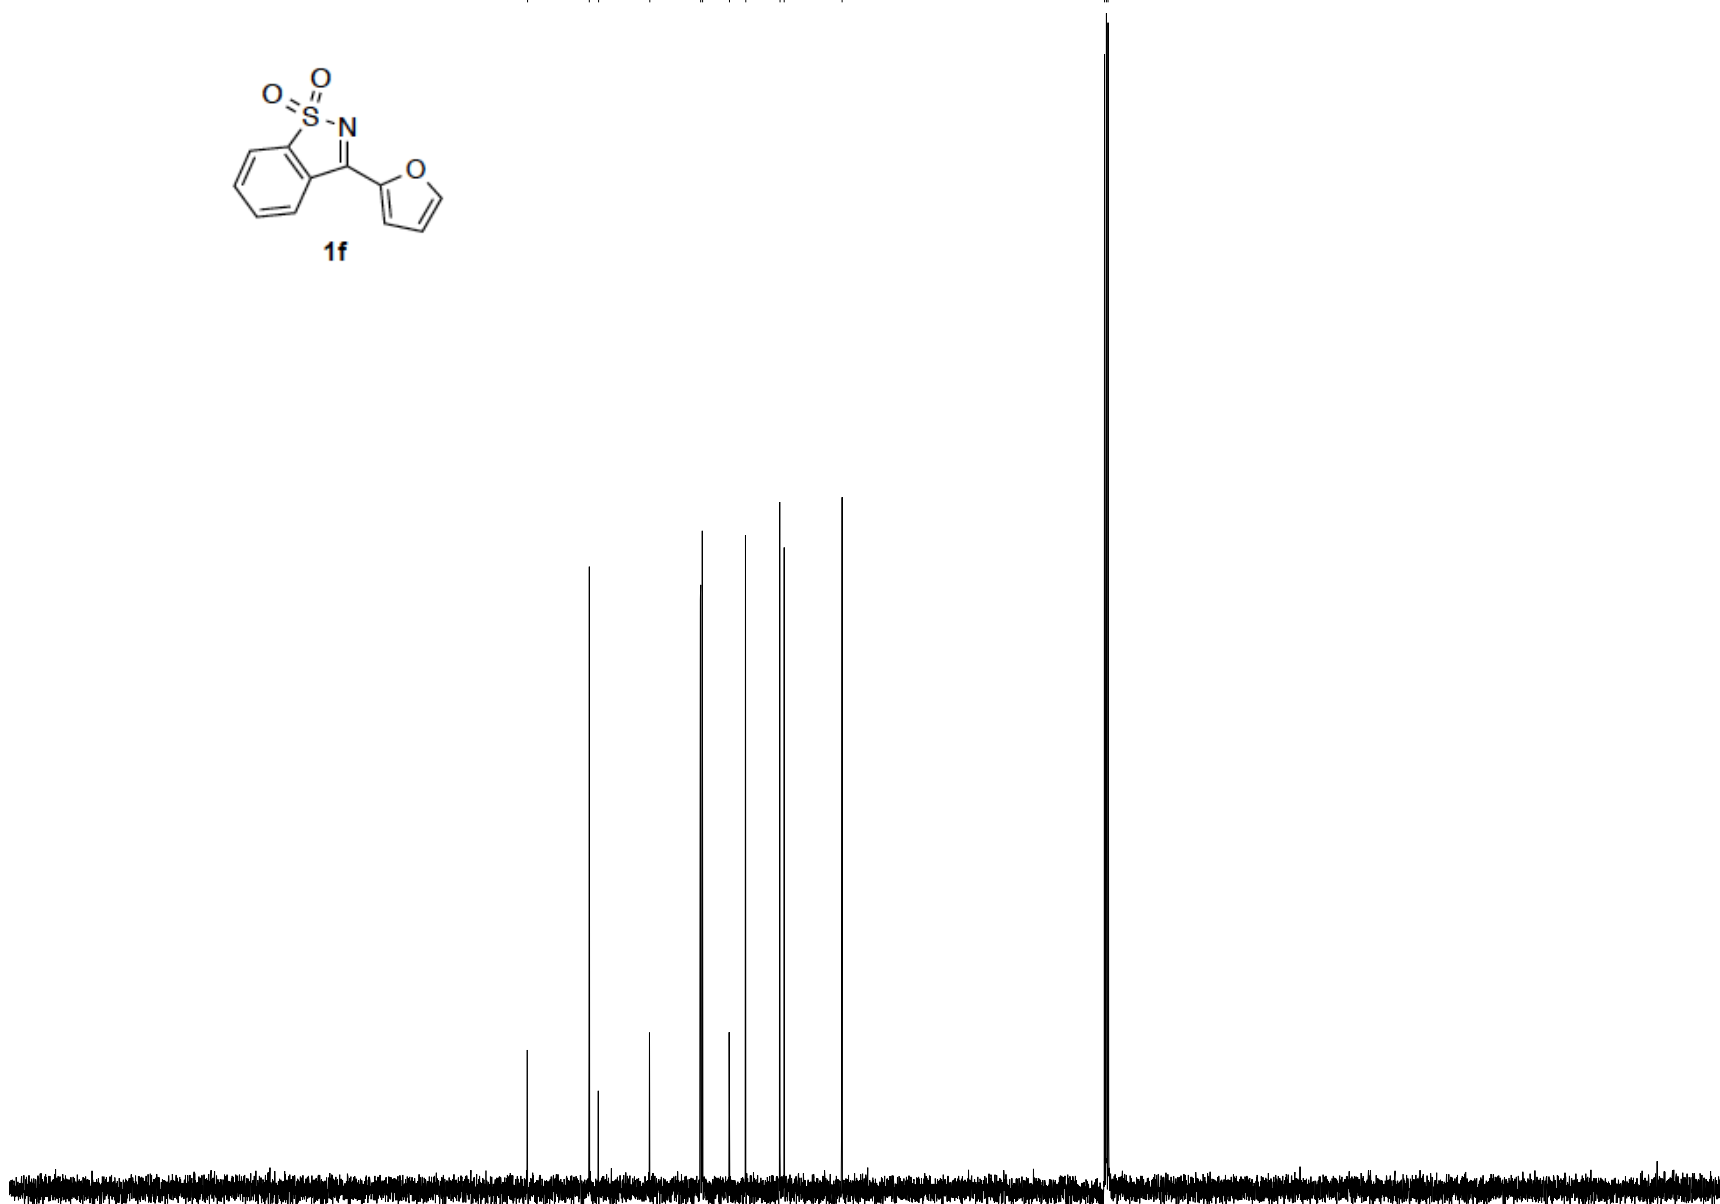

```

Current Data Parameters
USER      osborn
NAME      CAO-III-37-pure
EXPNO     2
PROCNO    1

F2 - Acquisition Parameters
Date_     20140818
Time      13.28
INSTRUM   cryo500
PROBHD    5 mm CPTCI 1H-
PULPROG   SpinEchopg30gp.prd
TD         65536
SOLVENT   CDCl3
NS         151
DS         15
SWH        30303.031 Hz
FIDRES     0.462388 Hz
AQ         1.0813940 sec
RG         7298.2
DW         16.500 usec
DE         6.00 usec
TE         298.0 K
D1         0.25000000 sec
d11        0.03000000 sec
d16        0.00020000 sec
d17        0.00019600 sec
MCREST     0.00000000 sec
MCMRXX     0.01500000 sec
P2         31.00 usec

===== CHANNEL f1 =====
NUC1       13c
P1         15.50 usec
P11        500.00 usec
P12        2000.00 usec
PL0        120.00 dB
PL1        -1.00 dB
SFO1       125.7942548 MHz
SF1        3.20 dB
SF2        3.20 dB
SFO1M1     Crp60,0.5,20.1
SFO1M2     Crp60comp,4
SFOFF1     0.00 Hz
SFOFF2     0.00 Hz

===== CHANNEL f2 =====
CPDPRG2    waltz16
NUC2       1H
PCPD2     100.00 usec
PL2        1.60 dB
PL12       24.60 dB
SFO2       500.2225011 MHz

===== GRADIENT CHANNEL =====
GENAM1     SINE.100
GENAM2     SINE.100
GFX1       0.00 %
GFX2       0.00 %
GPY1       0.00 %
GPY2       0.00 %
GPZ1       30.00 %
GPZ2       50.00 %
p15        500.00 usec
p16        1000.00 usec

F2 - Processing parameters
SI         65536
SF         125.7804090 MHz
WDW        EM
SSB        0
LB         1.00 Hz
GB         0
PC         2.00

ID NMR plot parameters
CX         22.80 cm
CY         15.65 cm
F1P        230.637 ppm
F1         29009.68 Hz
F2P        -10.287 ppm
F2         -1293.96 Hz
PFMCM      10.56688 ppm/cm
HZCM       1329.10693 Hz/cm
    
```

<sup>1</sup>H spectrum

ppm  
 8.4603  
 8.2998  
 8.2929  
 8.2832  
 8.0460  
 8.0362  
 8.0295  
 8.0015  
 7.9905  
 7.9871  
 7.9377  
 7.8265  
 7.8178  
 7.5789  
 7.5640  
 7.5487  
 7.5107  
 7.4955  
 7.4806  
 7.2616

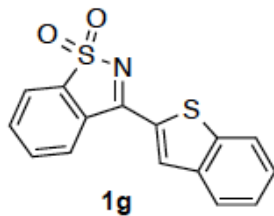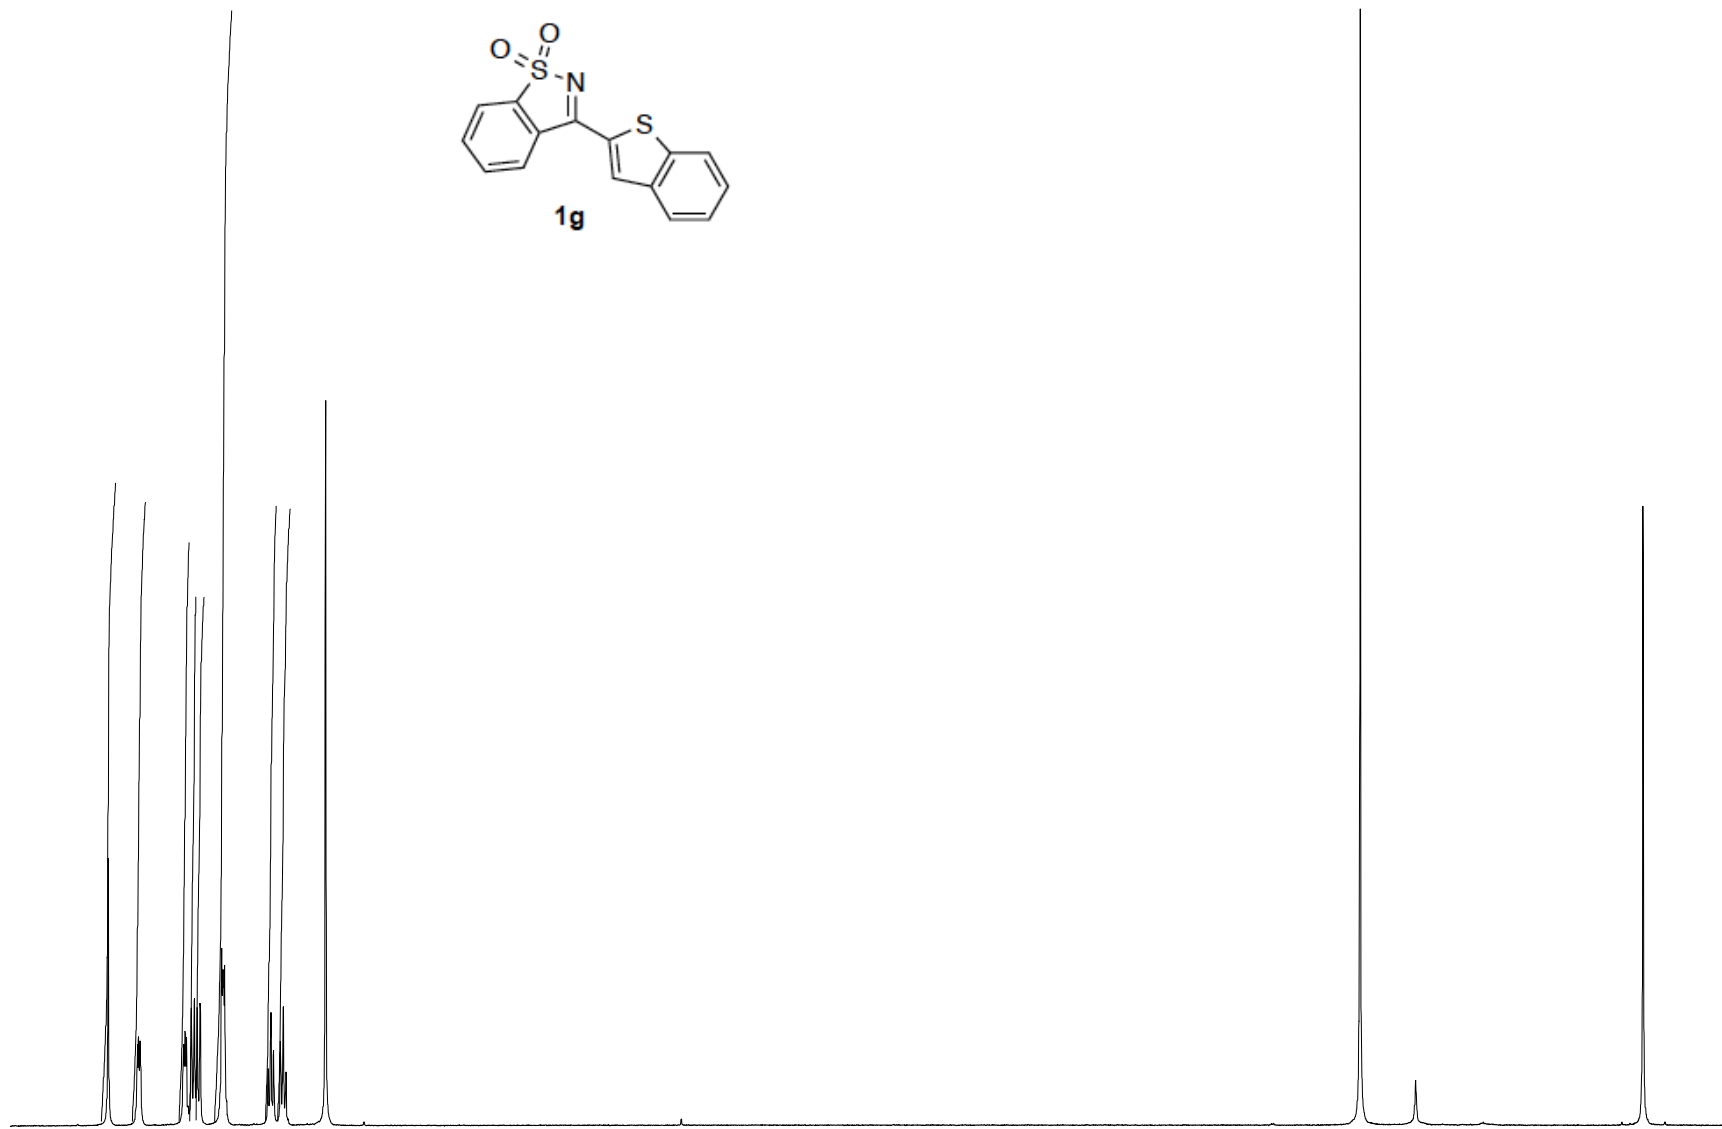

Integral  
 1.0371  
 1.0062  
 0.9403  
 0.8521  
 0.8519  
 1.8046  
 1.0000  
 0.9953

ppm  
 8  
 7  
 6  
 5  
 4  
 3  
 2  
 1  
 0

1.2592  
 1.2530  
 -0.0000

Current Data Parameters  
 USER osborn  
 NAME CAO-III-184-SI  
 EXPNO 3  
 PROCNO 1

F2 - Acquisition Parameters  
 Date\_ 20150529  
 Time 17.41  
 INSTRUM cryo500  
 PROBHD 5 mm CPTCI 1H-  
 PULPROG zg30  
 TD 81728  
 SOLVENT CDCl3  
 NS 8  
 DS 2  
 SWH 8012.820 Hz  
 FIDRES 0.098043 Hz  
 AQ 5.0998774 sec  
 RG 6.3  
 DW 62.400 usec  
 DE 6.00 usec  
 TE 298.0 K  
 DL 0.10000000 sec  
 MCREST 0.00000000 sec  
 MCWRR 0.01500000 sec

===== CHANNEL f1 =====  
 NUC1 1H  
 P1 7.50 usec  
 PL1 1.60 dB  
 SF01 500.2235015 MHz

F2 - Processing parameters  
 SI 65536  
 SF 500.2200309 MHz  
 WW EM  
 SSB 0  
 LB 0.30 Hz  
 GB 0  
 PC 4.00

1D NMR plot parameters  
 CX 22.80 cm  
 CY 15.00 cm  
 F1P 9.000 ppm  
 F1 4501.98 Hz  
 F2P -0.500 ppm  
 F2 -250.11 Hz  
 PPMCM 0.41667 ppm/cm  
 HZCM 208.42502 Hz/cm



Z-restored spin-echo 13C spectrum with 1H decoupling

ppm

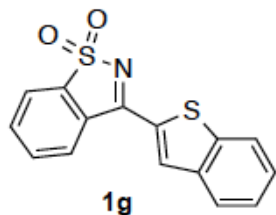

164.04  
142.86  
141.36  
139.15  
133.90  
133.70  
132.66  
130.38  
128.55  
126.11  
125.95  
123.33  
122.90

77.41  
77.16  
76.91

0.14

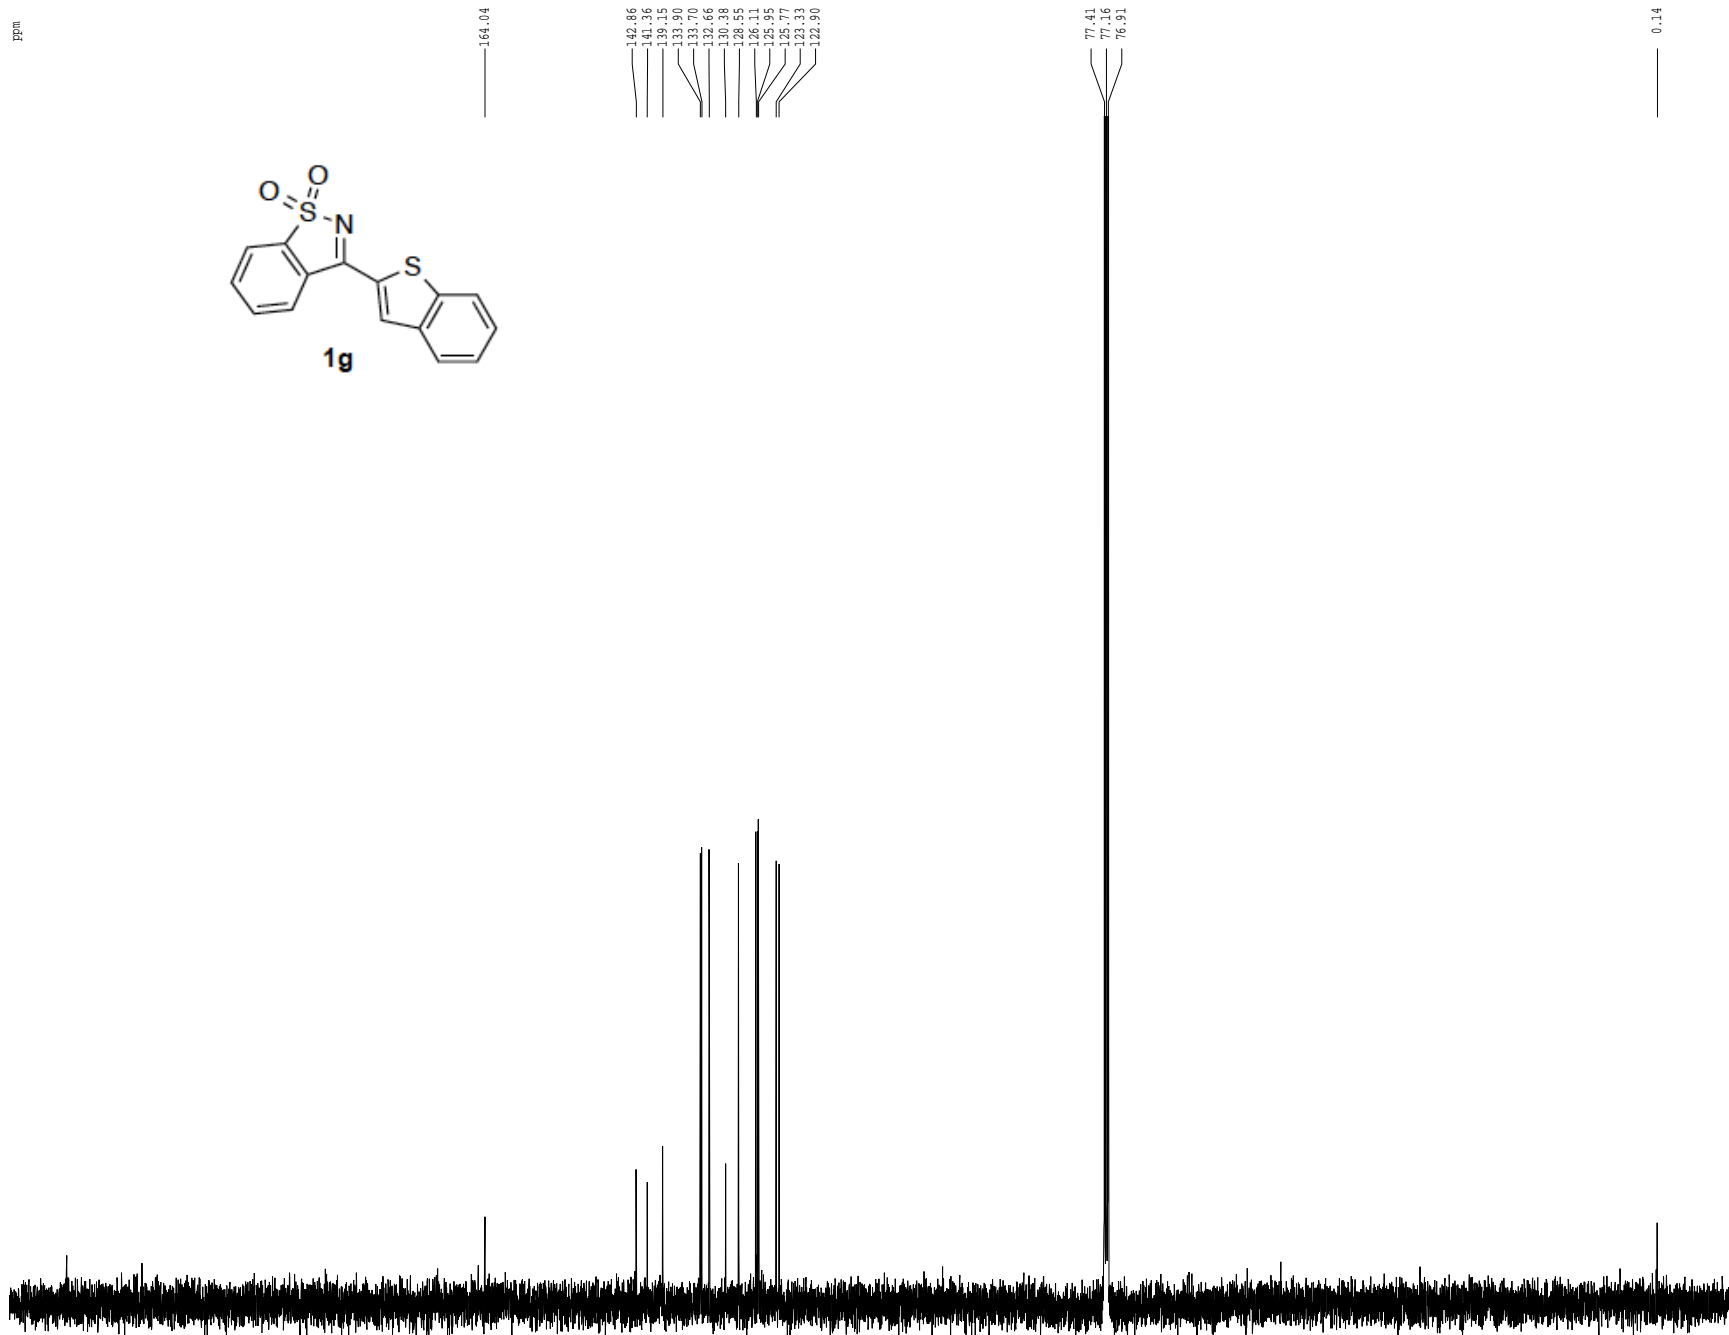

```

Current Data Parameters
USER      osborn
NAME      CAO-III-184-SI
EXPNO     4
PROCNO    1

F2 - Acquisition Parameters
Date_     20150529
Time      17.43
INSTRUM   cryo500
PROBHD    5 mm CPTCI 1H-
PULPROG   SpinEchopg30gp.prd
TD         65536
SOLVENT   CDCl3
NS         786
DS         16
SWH        30303.031 Hz
FIDRES     0.462388 Hz
AQ         1.0813940 sec
RG         7298.2
DW         16.500 usec
DE         6.00 usec
TE         298.0 K
D1         0.25000000 sec
d11        0.03000000 sec
d16        0.00020000 sec
d17        0.00019600 sec
MCREST     0.00000000 sec
MCMRXX     0.01500000 sec
P2         33.10 usec

===== CHANNEL f1 =====
NUC1       13c
P1         16.55 usec
P11        500.00 usec
P12        2000.00 usec
PL0        120.00 dB
PL1        -1.00 dB
SFO1       125.7942548 MHz
SF1        2.70 dB
SF2        2.70 dB
SFO1M1     Crp60,0.5,20.1
SFO1M2     Crp60comp,4
SFOFF1     0.00 Hz
SFOFF2     0.00 Hz

===== CHANNEL f2 =====
CPDPRG2    waltz16
NUC2       1H
PCPD2      100.00 usec
PL2        1.60 dB
PL12       24.50 dB
SFO2       500.2225011 MHz

===== GRADIENT CHANNEL =====
GENAM1     SINE.100
GENAM2     SINE.100
GFX1       0.00 %
GFX2       0.00 %
GPY1       0.00 %
GPY2       0.00 %
GPZ1       30.00 %
GPZ2       50.00 %
p15        500.00 usec
p16        1000.00 usec

F2 - Processing parameters
SI         65536
SF         125.7804080 MHz
WDW        EM
SSB        0
LB         1.00 Hz
GB         0
PC         2.00

ID NMR plot parameters
CX         22.80 cm
CY         60.00 cm
F1P        230.637 ppm
F1         29009.68 Hz
F2P        -10.287 ppm
F2         -1293.96 Hz
PFMCM      10.56688 ppm/cm
HZCM       1329.10693 Hz/cm
    
```

ppm 200 150 100 50 0

<sup>1</sup>H spectrum

ppm  
 8.23041  
 8.22976  
 8.22875  
 8.22701  
 8.22044  
 8.19766  
 8.19285  
 8.18407  
 8.02048  
 8.01582  
 8.01277  
 8.00675  
 8.00342  
 7.99645  
 7.88427  
 7.87565  
 7.87428  
 7.81636  
 7.80346  
 7.79568  
 7.78820  
 7.78651  
 7.77512  
 7.54939  
 7.33020  
 7.28318

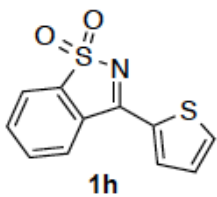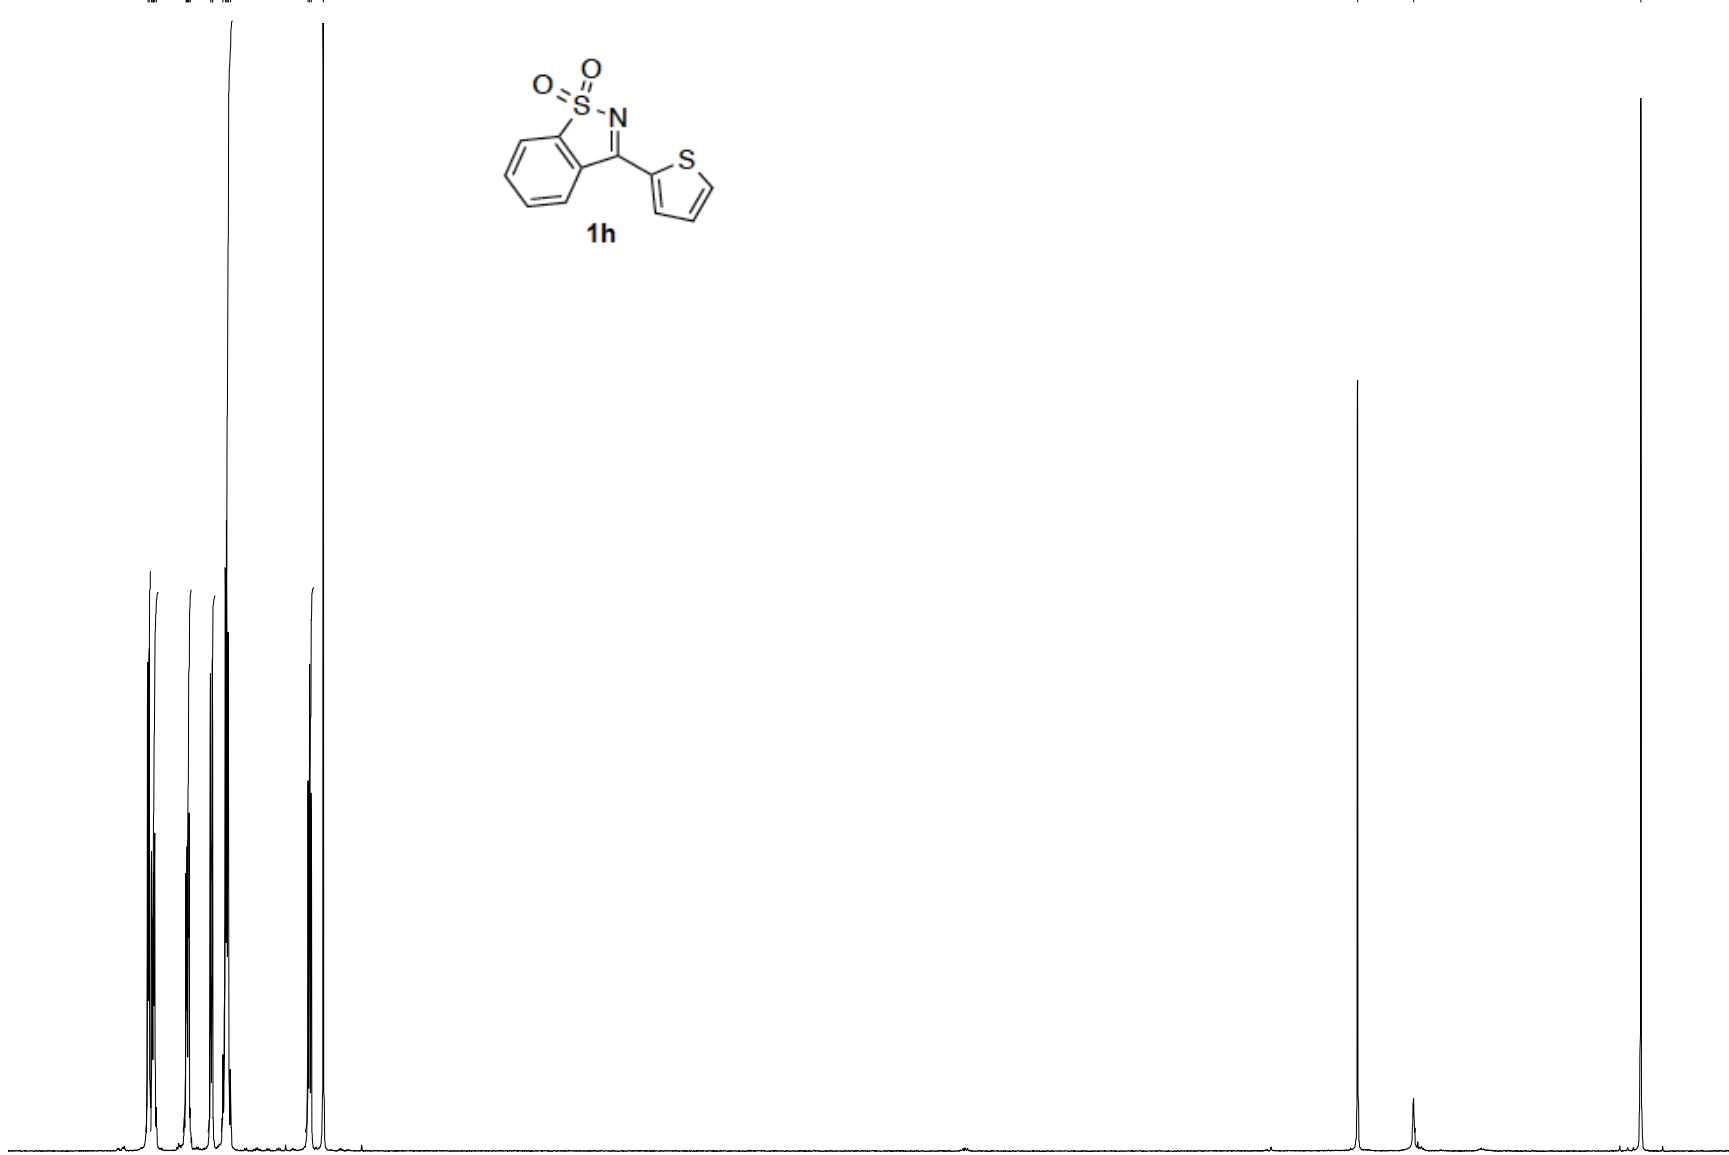

Integral  
 1.0775  
 0.9801  
 0.9840  
 0.9738  
 2.0181  
 0.9884

1.56194  
 1.25335  
 0.00076

Current Data Parameters  
 USER osborn  
 NAME CAO-III-24-pure  
 EXPNO 1  
 PROCNO 1

F2 - Acquisition Parameters  
 Date\_ 20140818  
 Time 13.35  
 INSTRUM cryo500  
 PROBHD 5 mm CPTCI 1H-  
 PULPROG zg30  
 TD 81728  
 SOLVENT CDCl3  
 NS 8  
 DS 2  
 SWH 8012.820 Hz  
 FIDRES 0.098043 Hz  
 AQ 5.0998774 sec  
 RG 8  
 DW 62.400 usec  
 DE 6.00 usec  
 TE 298.0 K  
 DL 0.10000000 sec  
 MCREST 0.00000000 sec  
 MCWRR 0.01500000 sec

===== CHANNEL f1 =====  
 NUC1 1H  
 P1 7.50 usec  
 PL1 1.60 dB  
 SF01 500.2235015 MHz

F2 - Processing parameters  
 SI 65536  
 SF 500.2200296 MHz  
 WW EM  
 SSB 0  
 LB 0.30 Hz  
 GB 0  
 PC 4.00

1D NMR plot parameters  
 CX 22.80 cm  
 CY 15.00 cm  
 F1P 9.000 ppm  
 F1 4501.98 Hz  
 F2P -0.500 ppm  
 F2 -250.11 Hz  
 PPMCM 0.41667 ppm/cm  
 HZCM 208.42502 Hz/cm

Z-restored spin-echo 13C spectrum with 1H decoupling

ppm

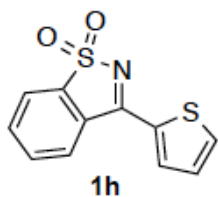

163.12  
141.40  
135.76  
133.27  
133.76  
133.76  
133.59  
130.48  
129.23  
125.85  
123.16

77.42  
77.16  
76.91

0.14

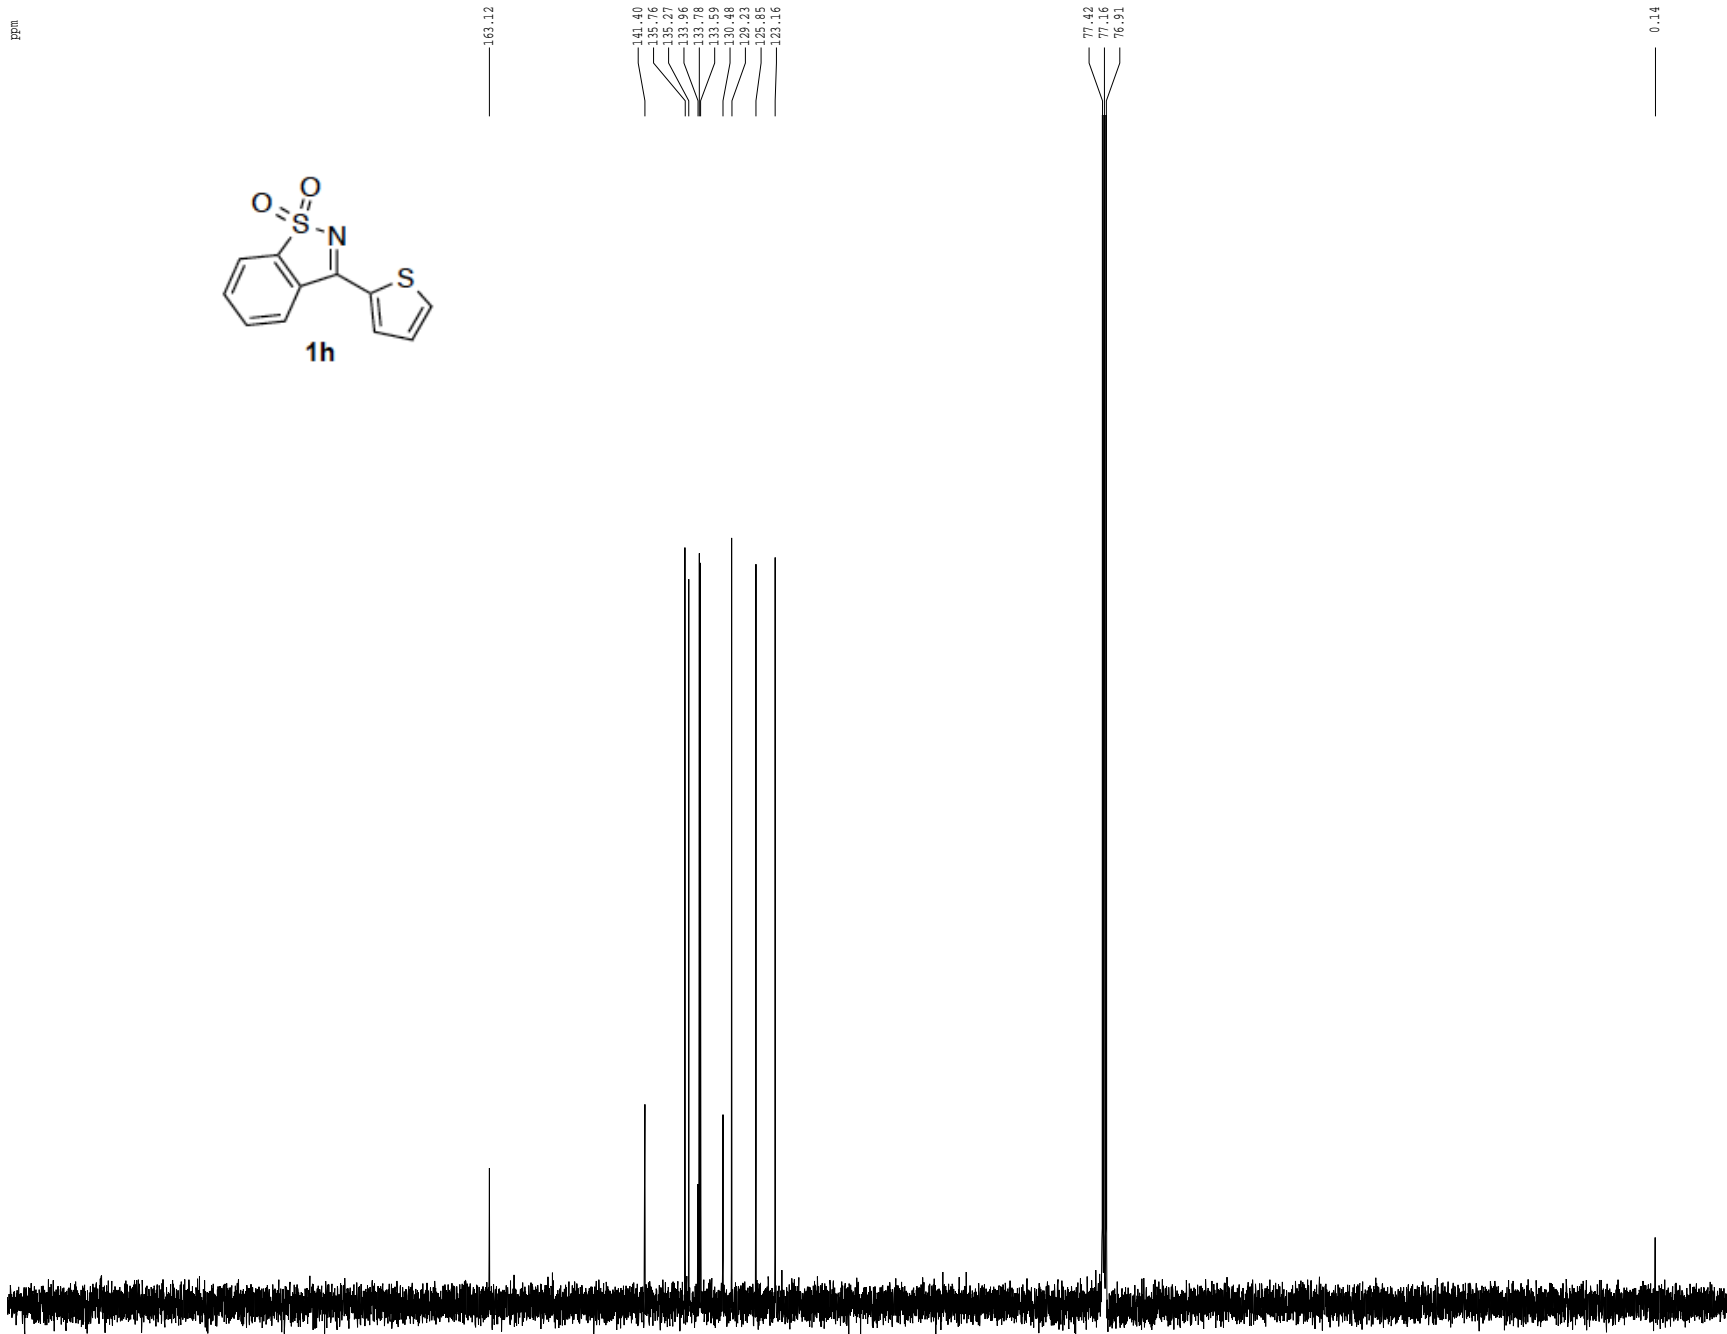

Current Data Parameters  
USER osborn  
NAME CAO-III-24-pure  
EXPNO 2  
PROCNO 1

F2 - Acquisition Parameters  
Date\_ 20140818  
Time 13.37  
INSTRUM cryo500  
PROBHD 5 mm CPTCI 1H-  
PULPROG SpinEchopg30gp.prd  
TD 65536  
SOLVENT CDCl3  
NS 276  
DS 16  
SWH 30303.031 Hz  
FIDRES 0.462388 Hz  
AQ 1.0813940 sec  
RG 3649.1  
DW 16.500 usec  
DE 6.00 usec  
TE 298.0 K  
D1 0.25000000 sec  
d11 0.03000000 sec  
d16 0.00020000 sec  
d17 0.00019600 sec  
MCREST 0.00000000 sec  
MCMRK 0.01500000 sec  
P2 31.00 usec

\*\*\*\*\* CHANNEL f1 \*\*\*\*\*  
NUC1 13c  
P1 15.50 usec  
P11 500.00 usec  
P12 2000.00 usec  
PL0 120.00 dB  
PL1 -1.00 dB  
SFO1 125.7942548 MHz  
SF1 3.20 dB  
SF2 3.20 dB  
SFOAM1 Crp60,0.5,20.1  
SFOAM2 Crp60comp,4  
SFOFF1 0.00 Hz  
SFOFF2 0.00 Hz

\*\*\*\*\* CHANNEL f2 \*\*\*\*\*  
CPDPRG2 waltz16  
NUC2 1H  
PCPD2 100.00 usec  
PL2 1.60 dB  
PL12 24.60 dB  
SFO2 500.2225011 MHz

\*\*\*\*\* GRADIENT CHANNEL \*\*\*\*\*  
GENAM1 SINE.100  
GENAM2 SINE.100  
GFX1 0.00 %  
GFX2 0.00 %  
GPY1 0.00 %  
GPY2 0.00 %  
GPZ1 30.00 %  
GPZ2 50.00 %  
p15 500.00 usec  
p16 1000.00 usec

F2 - Processing parameters  
SI 65536  
SF 125.7804085 MHz  
WDW EM  
SSB 0  
LB 1.00 Hz  
GB 0  
PC 2.00

1D NMR plot parameters  
CX 22.80 cm  
CY 35.00 cm  
F1 230.637 ppm  
F2 29009.68 Hz  
F2P -10.287 ppm  
F2 -1293.96 Hz  
PFMCM 10.56688 ppm/cm  
HZCM 1329.10693 Hz/cm

ppm 200 150 100 50 0

<sup>1</sup>H spectrum

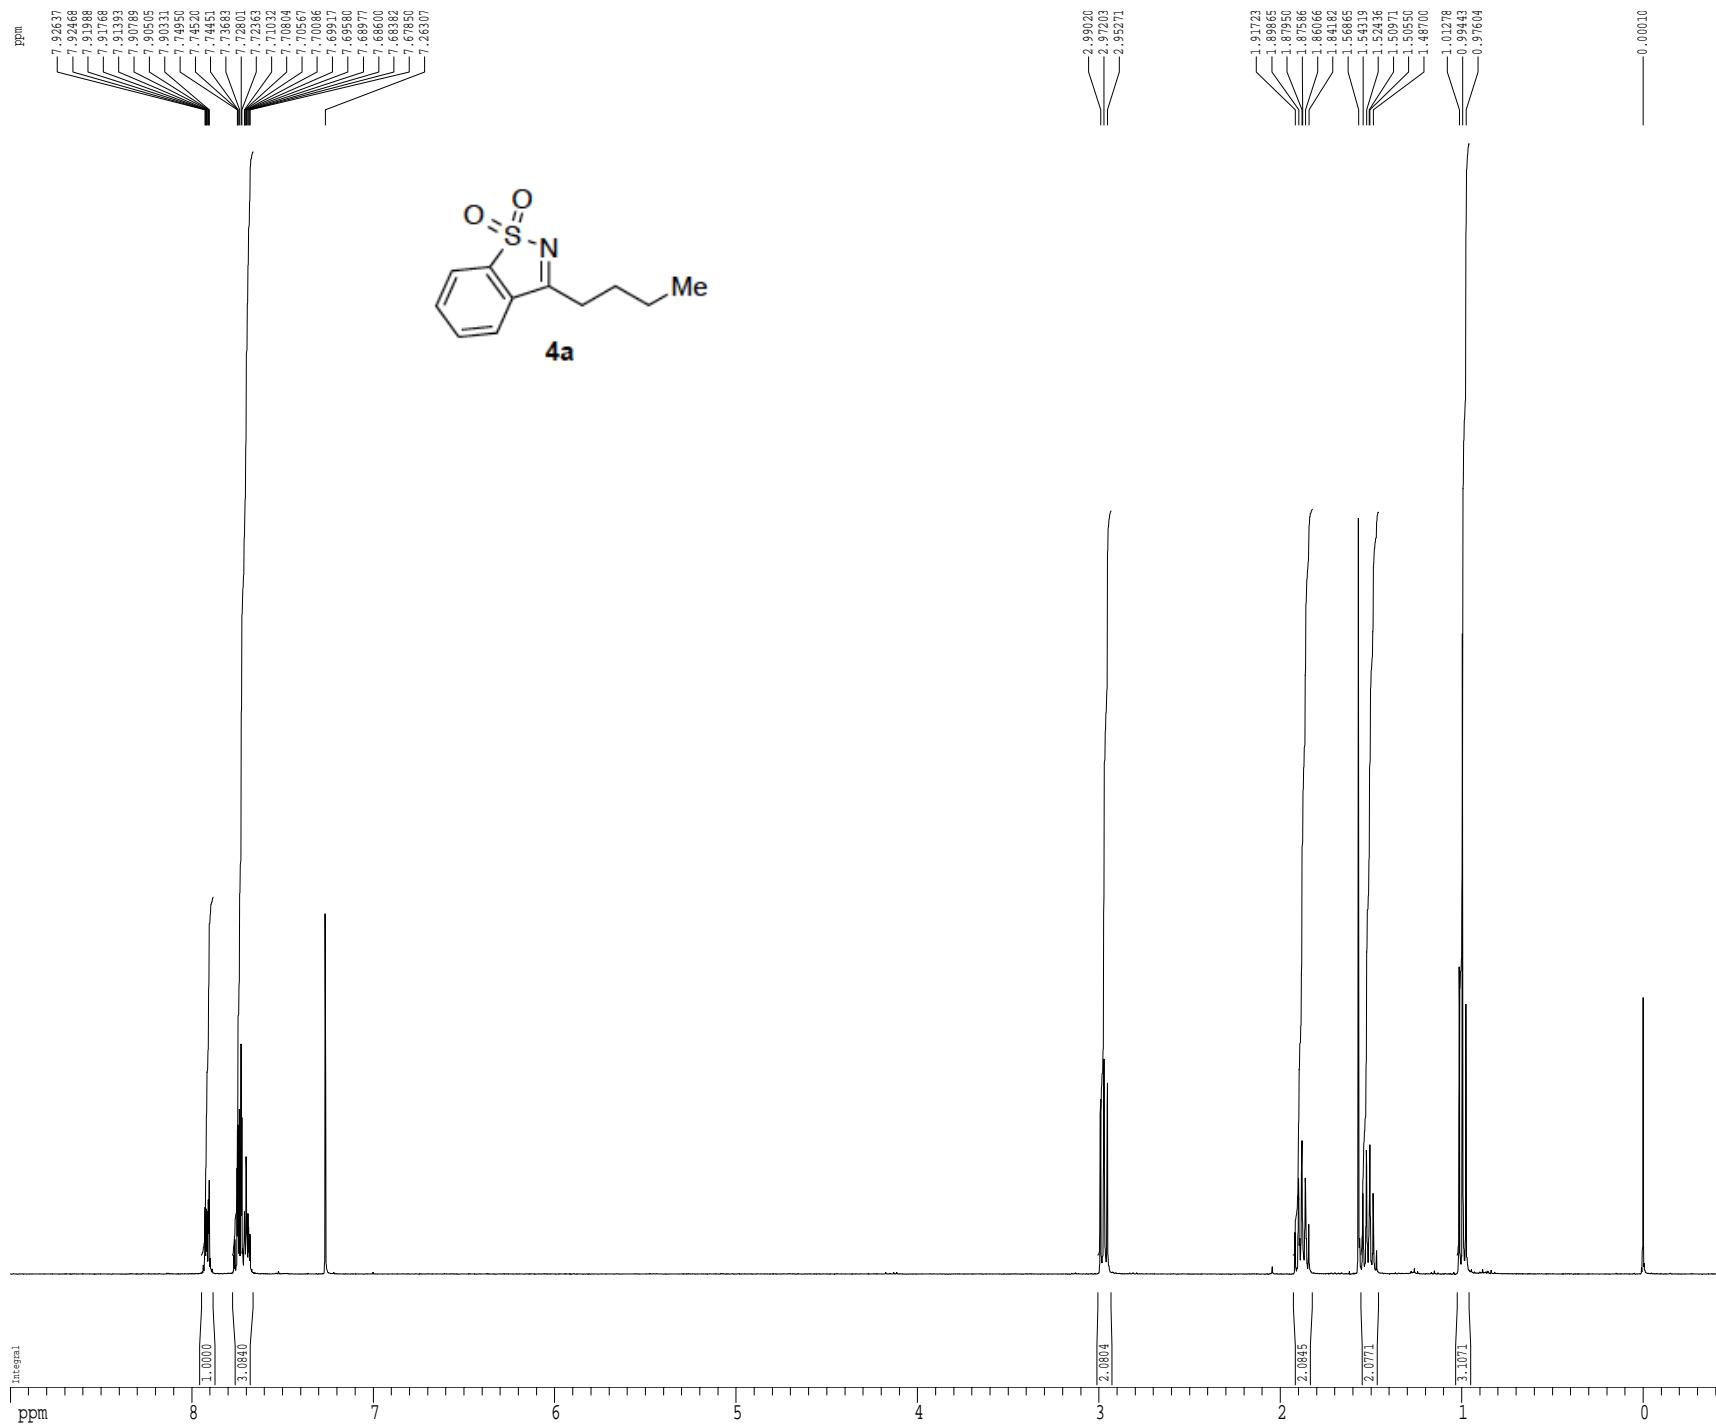

Current Data Parameters  
 USER osborn  
 NMR CA0-III-45B-xtal  
 EXPNO 1  
 PROCNO 1

F2 - Acquisition Parameters  
 Date\_ 20140917  
 Time 11.17  
 INSTRUM drx400  
 PROBHD 5 mm QNP H/P/P  
 PULPROG zg30  
 TD 65536  
 SOLVENT CDCl3  
 NS 8  
 DS 2  
 SWH 6410.256 Hz  
 FIDRES 0.097813 Hz  
 AQ 5.1118579 sec  
 RG 456.1  
 DW 78.000 usec  
 DE 4.50 usec  
 TE 298.0 K  
 D1 0.10000000 sec  
 MCREST 0.00000000 sec  
 MCMRK 0.01500000 sec

===== CHANNEL f1 =====  
 NUC1 1H  
 P1 12.00 usec  
 PL1 0.00 dB  
 SF01 400.1328009 MHz

F2 - Processing parameters  
 SI 65536  
 SF 400.1300196 MHz  
 WDW EM  
 SSB 0  
 LB 0.30 Hz  
 GB 0  
 PC 2.00

1D NMR plot parameters  
 CX 22.80 cm  
 CY 10.00 cm  
 F1P 9.000 ppm  
 F1 3601.17 Hz  
 F2P -0.500 ppm  
 F2 -200.06 Hz  
 PPMCM 0.41667 ppm/cm  
 HZCM 166.72084 Hz/cm

Z-restored spin-echo 13C spectrum with 1H decoupling

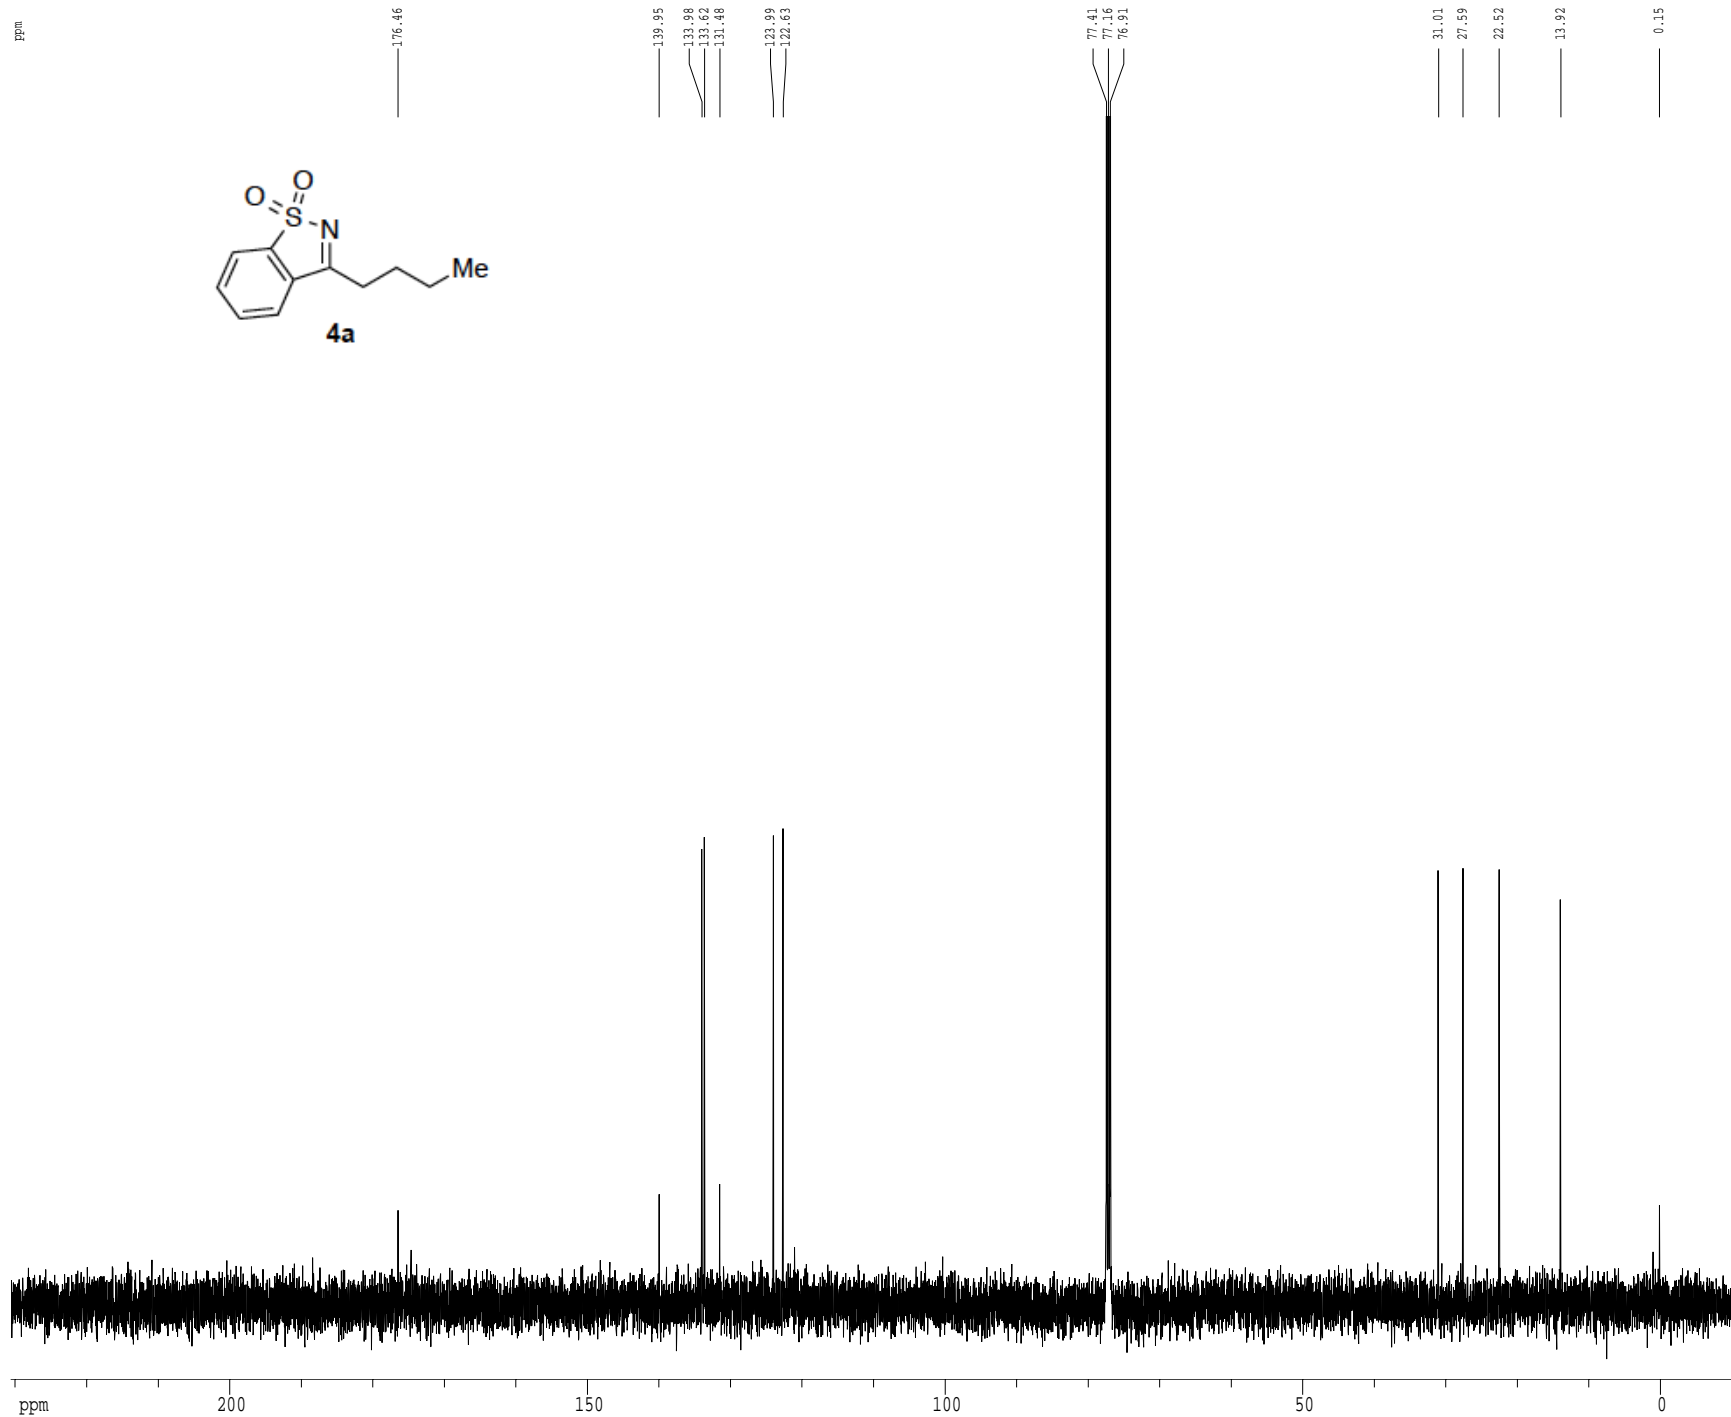

```

Current Data Parameters
USER      osborn
NAME      CAO-III-61P-SI
EXPNO     4
PROCNO    1

F2 - Acquisition Parameters
Date_     20150529
Time      18.23
INSTRUM   cryo500
PROBHD    5 mm CPTCI 1H-
PULPROG   SpinEchopg30gp.prd
TD         65536
SOLVENT   CDCl3
NS         401
DS         16
SWH        30303.031 Hz
FIDRES     0.462388 Hz
AQ         1.0813940 sec
RG         7298.2
DW         16.500 usec
DE         6.00 usec
TE         298.0 K
D1         0.25000000 sec
d11        0.03000000 sec
D16        0.00020000 sec
d17        0.00019600 sec
MCREST     0.00000000 sec
MCMRXX     0.01500000 sec
P2         33.10 usec

===== CHANNEL f1 =====
NUC1       13C
P1         16.55 usec
P11        500.00 usec
P12        2000.00 usec
PL0        120.00 dB
PL1        -1.00 dB
SFO1       125.7942548 MHz
SF1        2.70 dB
SF2        2.70 dB
SFO1M1     Crp60,0.5,20.1
SFO1M2     Crp60comp,4
SFOFF1     0.00 Hz
SFOFF2     0.00 Hz

===== CHANNEL f2 =====
CPDPRG2    waltz16
NUC2       1H
PCPD2     100.00 usec
PL2       1.60 dB
PL12      24.50 dB
SFO2      500.2225011 MHz

===== GRADIENT CHANNEL =====
GENAM1     SINE.100
GENAM2     SINE.100
GFX1       0.00 %
GFX2       0.00 %
GPF1       0.00 %
GPF2       0.00 %
GPF3       0.00 %
GPF4       30.00 %
GPF5       50.00 %
p15        500.00 usec
p16        1000.00 usec

F2 - Processing parameters
SI         65536
SF         125.7804080 MHz
WDW        EM
SSB        0
LB         1.00 Hz
GB         0
PC         2.00

ID NMR plot parameters
CX         22.80 cm
CY         60.00 cm
F1P        230.637 ppm
F1         29009.68 Hz
F2P        -10.287 ppm
F2         -1293.96 Hz
PFMCM      10.56688 ppm/cm
HZCM       1329.10693 Hz/cm
    
```

<sup>1</sup>H spectrum

ppm  
 7.98483  
 7.97913  
 7.97638  
 7.96900  
 7.87977  
 7.87355  
 7.86866  
 7.80997  
 7.80891  
 7.79549  
 7.78226  
 7.75328  
 7.74977  
 7.32005

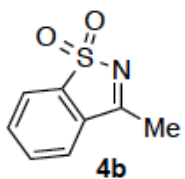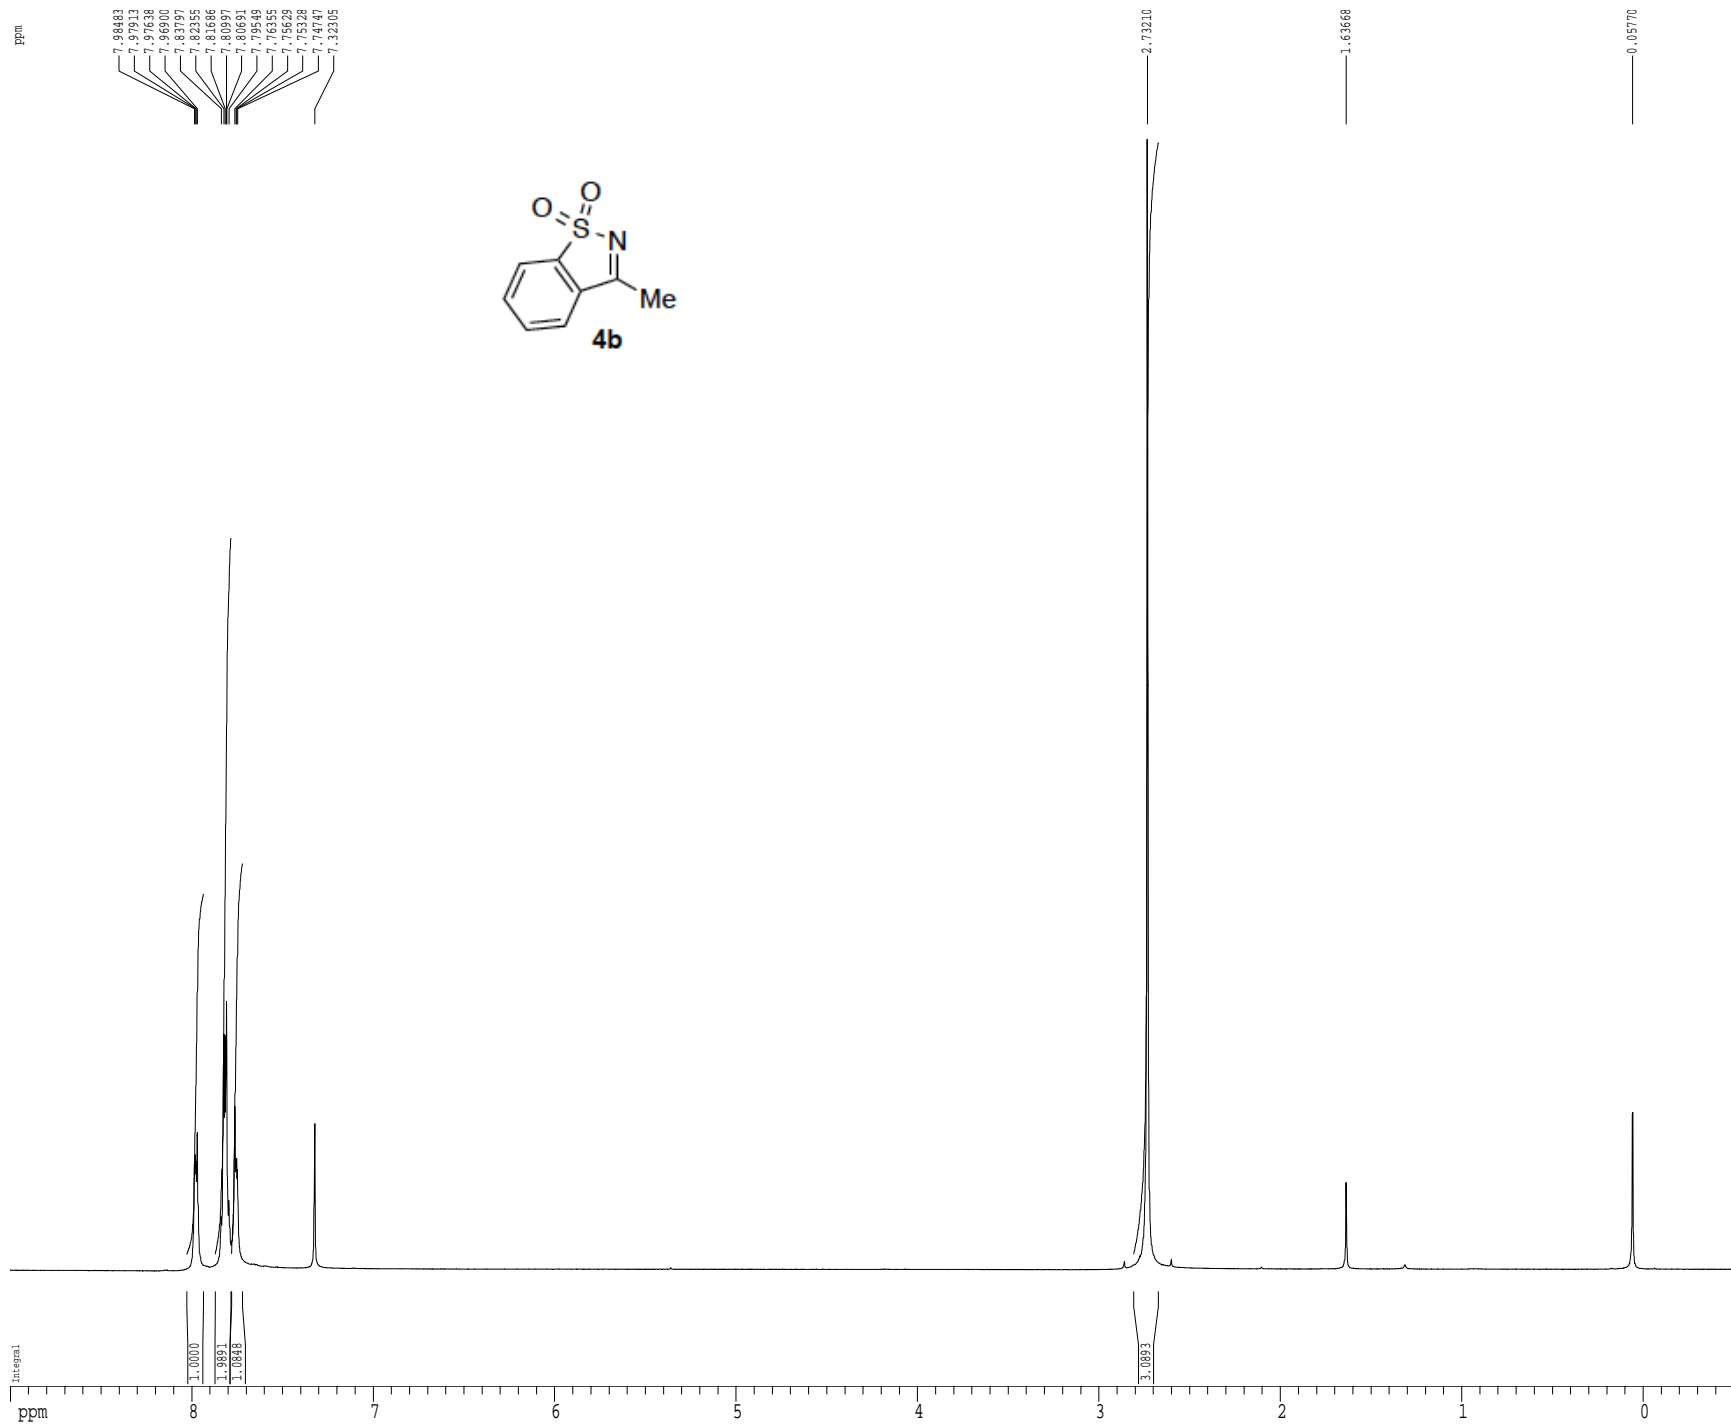

```

Current Data Parameters
USER      osborn
NAME      CAO-III-118-SI
EXPNO     3
PROCNO    1

F2 - Acquisition Parameters
Date_     20150528
Time      15.25
INSTRUM   cryo500
PROBHD    5 mm CPTCI 1H-
PULPROG   zg30
TD         81728
SOLVENT   CDCl3
NS         8
DS         2
SWH        8012.820 Hz
FIDRES     0.098043 Hz
AQ         5.0998774 sec
RG         5.7
DW         62.400 usec
DE         6.00 usec
TE         298.0 K
DL         0.10000000 sec
MCREST     0.00000000 sec
MCWRX      0.01500000 sec

===== CHANNEL f1 =====
NUC1       1H
P1         7.50 usec
PL1        1.60 dB
SF01       500.2235015 MHz

F2 - Processing parameters
SI         65536
SF         500.2200000 MHz
WDW        EM
SSB        0
LB         0.30 Hz
GB         0
PC         4.00

1D NMR plot parameters
CX         22.80 cm
CY         15.00 cm
F1P        9.000 ppm
F1         4501.98 Hz
F2P        -0.500 ppm
F2         -250.11 Hz
PPMCM      0.41667 ppm/cm
HZCM       208.42500 Hz/cm
    
```

Z-restored spin-echo 13C spectrum with 1H decoupling

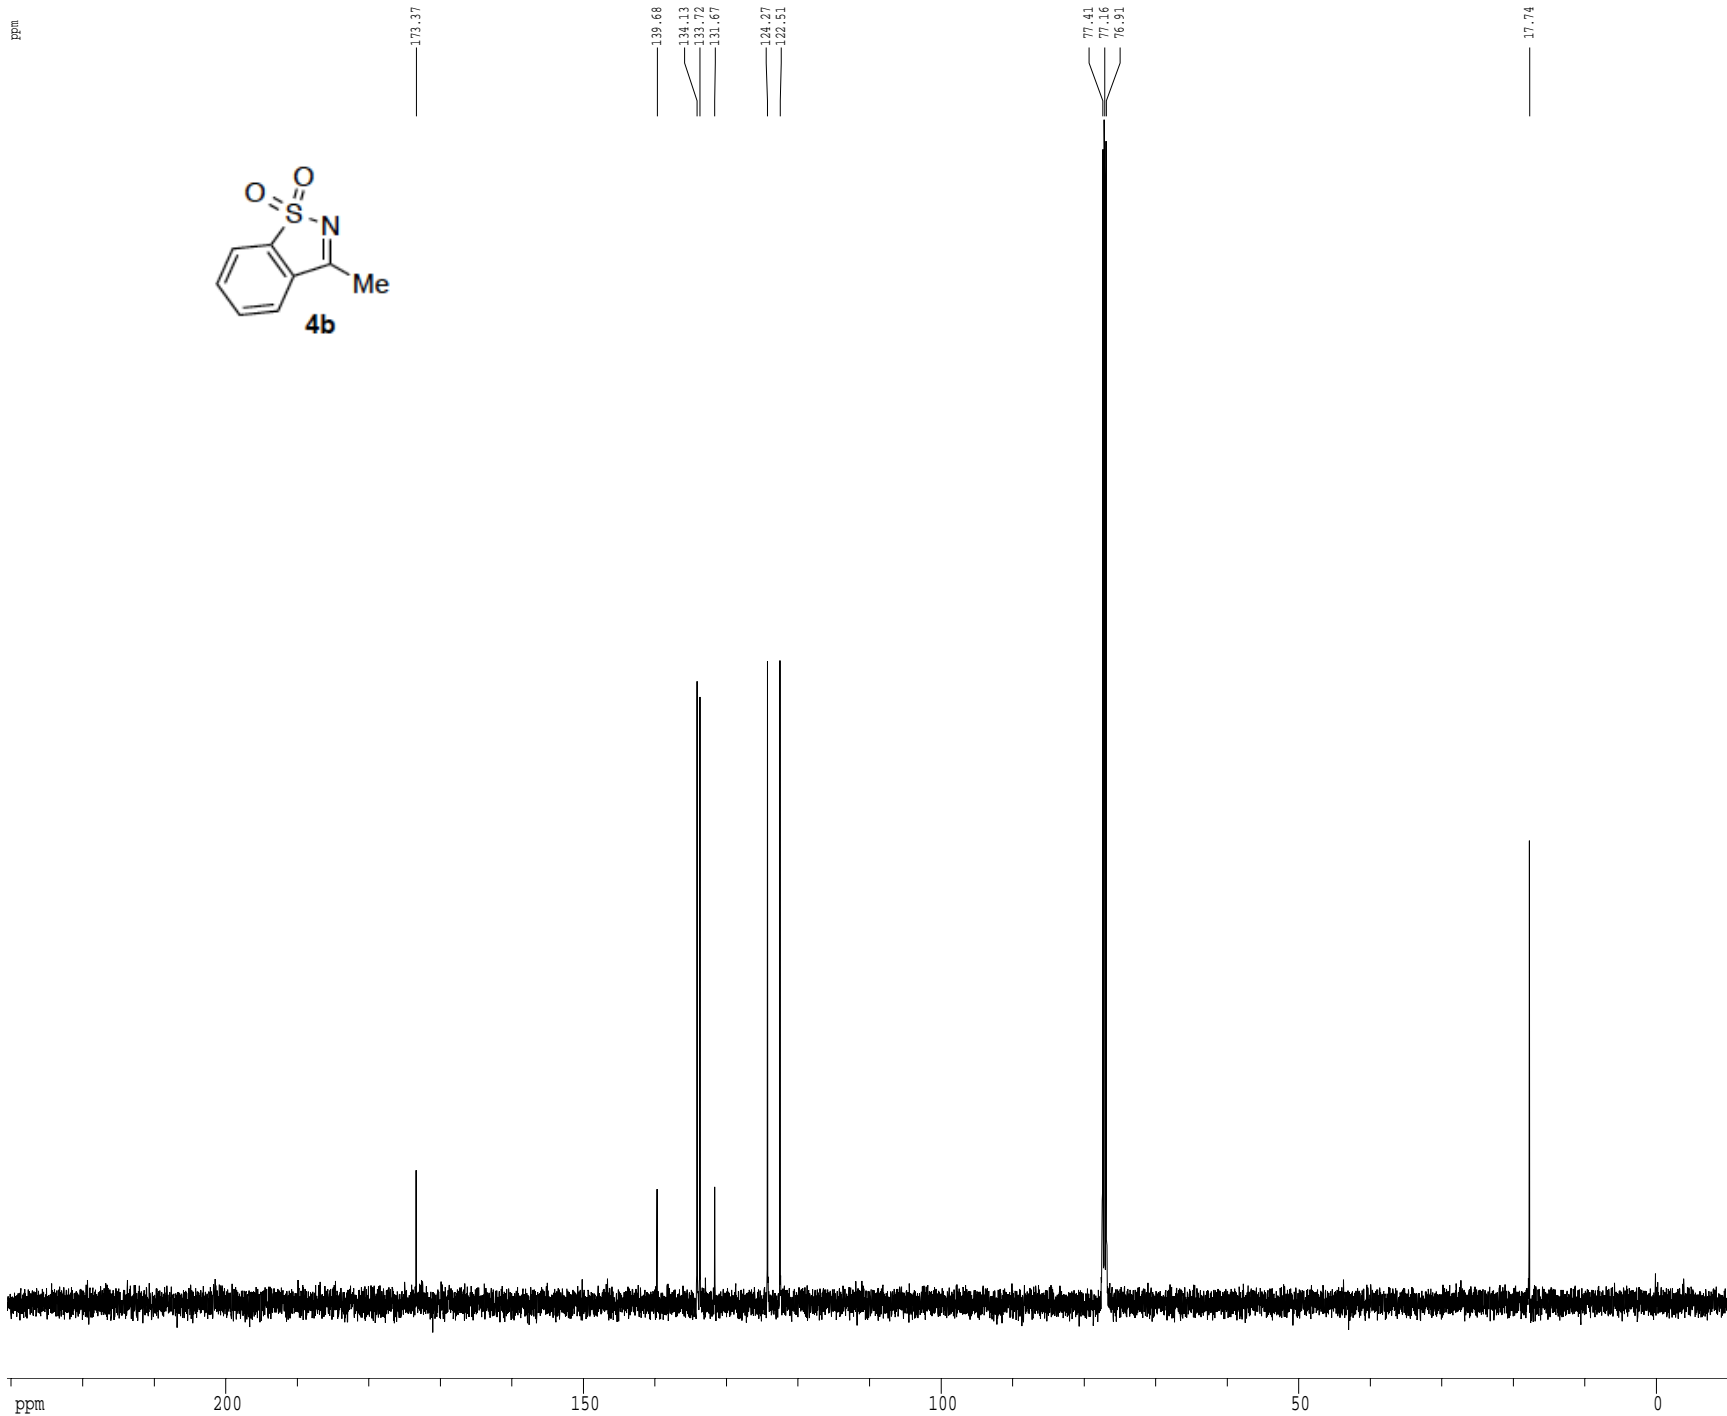

```

Current Data Parameters
USER      osborn
NAME      CAO-III-118-SI
EXPNO     2
PROCNO    1

F2 - Acquisition Parameters
Date_     20150528
Time      15.18
INSTRUM   cryo500
PROBHD    5 mm CPTCI 1H-
PULPROG   SpinEchopg30gp.prd
TD         65536
SOLVENT   CDCl3
NS         231
DS         15
SWH        30303.031 Hz
FIDRES     0.462388 Hz
AQ         1.0813940 sec
RG         8192
DW         16.500 usec
DE         6.00 usec
TE         298.0 K
D1         0.25000000 sec
d11        0.03000000 sec
D16        0.00020000 sec
d17        0.00019600 sec
MCREST     0.00000000 sec
MCONRXX    0.01500000 sec
P2         33.10 usec

===== CHANNEL f1 =====
NUC1       13C
P1         16.55 usec
P11        500.00 usec
P12        2000.00 usec
PL0        120.00 dB
PL1        -1.00 dB
SFO1       125.7942548 MHz
SF1        2.70 dB
SF2        2.70 dB
SFO1M1     Crp60,0.5,20.1
SFO1M2     Crp60comp,4
SFOFF1     0.00 Hz
SFOFF2     0.00 Hz

===== CHANNEL f2 =====
CPDPRG2    waltz16
NUC2       1H
PCPD2     100.00 usec
PL2       1.60 dB
PL12      24.50 dB
SFO2      500.2225011 MHz

===== GRADIENT CHANNEL =====
GENAM1     SINE.100
GENAM2     SINE.100
GFX1       0.00 %
GFX2       0.00 %
GPF1       0.00 %
GPF2       0.00 %
GPF3       0.00 %
GPF4       30.00 %
GPF5       50.00 %
p15        500.00 usec
p16        1000.00 usec

F2 - Processing parameters
SI         65536
SF         125.7804103 MHz
WDW        EM
SSB        0
LB         1.00 Hz
GB         0
PC         2.00

ID NMR plot parameters
CX         22.80 cm
CY         15.65 cm
F1P        230.637 ppm
F1         29009.68 Hz
F2P        -10.287 ppm
F2         -1293.96 Hz
PFMCM      10.56688 ppm/cm
HZCM       1329.10693 Hz/cm
    
```

<sup>1</sup>H spectrum

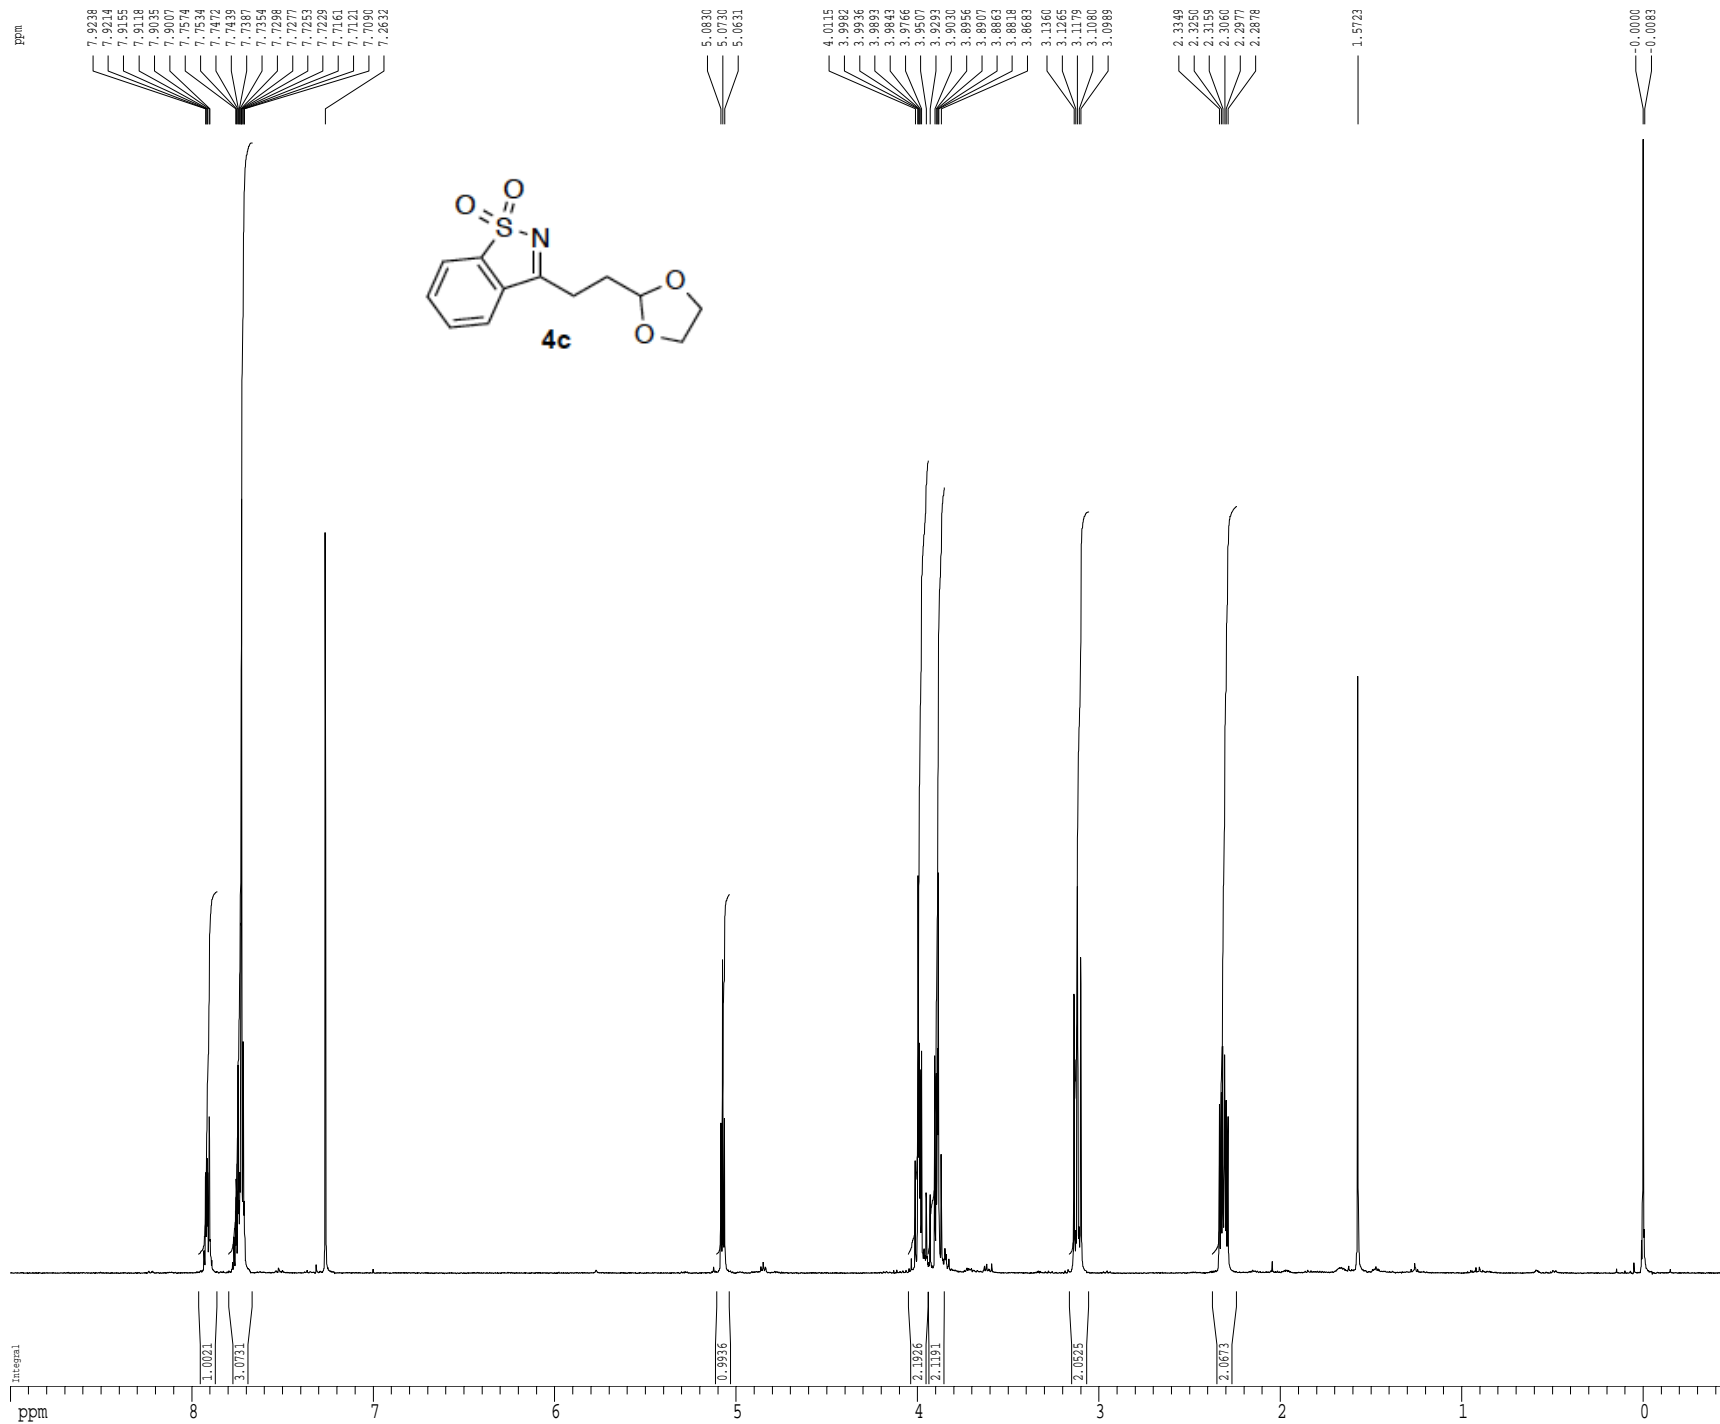

Current Data Parameters  
 USER osborn  
 NAME CAO-III-101-pure  
 EXPNO 1  
 PROCNO 1

F2 - Acquisition Parameters  
 Date\_ 20141121  
 Time 12.17  
 INSTRUM drx400  
 PROBHD 5 mm QNP H/P/P  
 PULPROG zg30  
 TD 65536  
 SOLVENT CDCl3  
 NS 8  
 DS 2  
 SWH 6410.256 Hz  
 FIDRES 0.097813 Hz  
 AQ 5.118579 sec  
 RG 456.1  
 DW 78.000 usec  
 DE 4.50 usec  
 TE 298.0 K  
 D1 0.10000000 sec  
 MCREST 0.00000000 sec  
 MCWREK 0.01500000 sec

===== CHANNEL f1 =====  
 NUC1 1H  
 P1 12.00 usec  
 PL1 0.00 dB  
 SF01 400.1328009 MHz

F2 - Processing parameters  
 SI 65536  
 SF 400.1300196 MHz  
 WDW EM  
 SSB 0  
 LB 0.30 Hz  
 GB 0  
 PC 2.00

1D NMR plot parameters  
 CX 22.80 cm  
 CY 15.00 cm  
 FIP 9.000 ppm  
 F1 3601.17 Hz  
 F2P -0.500 ppm  
 F2 -200.06 Hz  
 PPMCM 0.41667 ppm/cm  
 HZCM 166.72084 Hz/cm



Z-restored spin-echo 13C spectrum with 1H decoupling

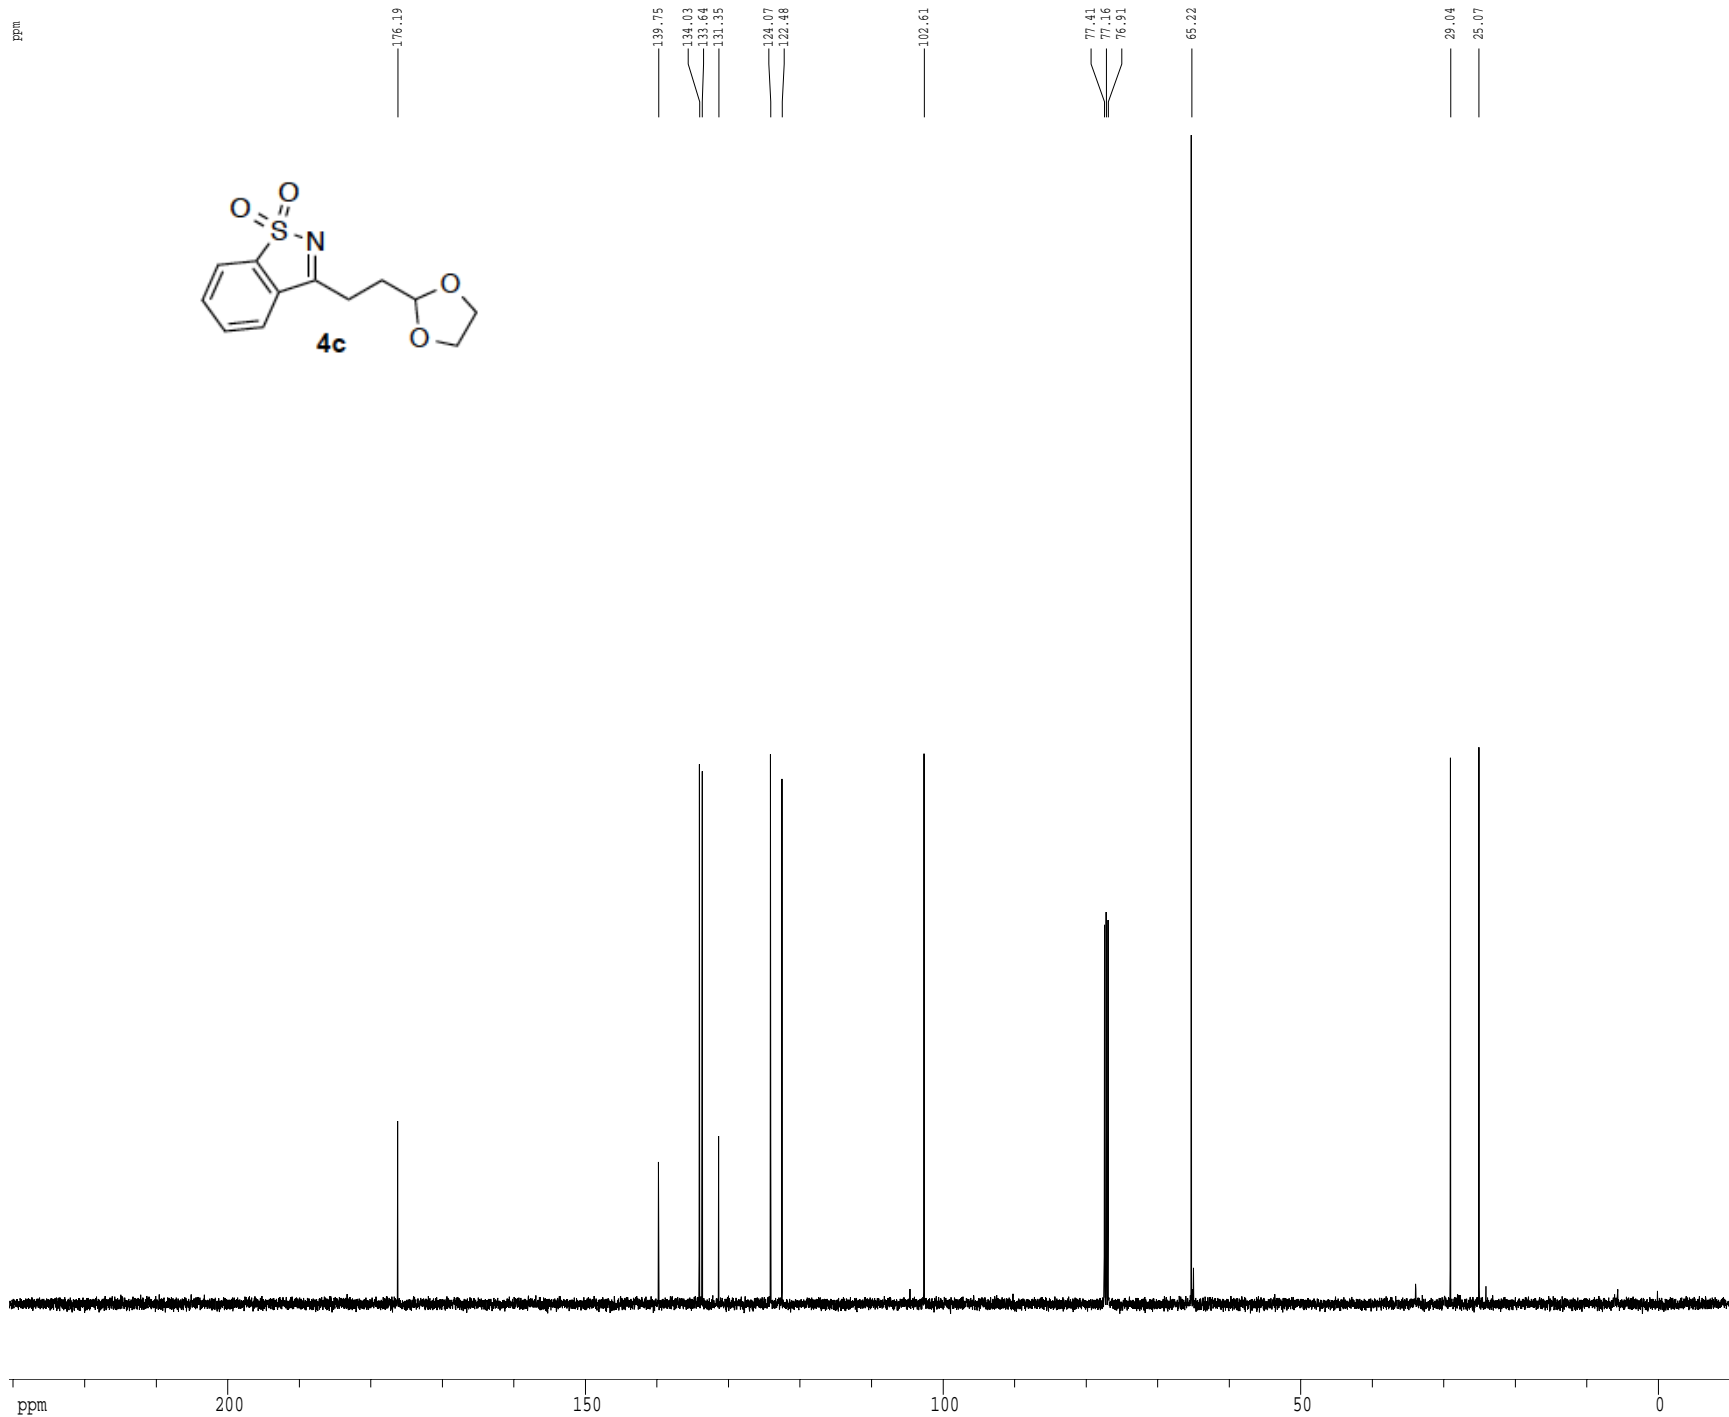

```

Current Data Parameters
USER      osborn
NAME      CAO-III-101-SI
EXPNO     3
PROCNO    1

F2 - Acquisition Parameters
Date_     20150528
Time      15.12
INSTRUM   cryo500
PROBHD    5 mm CPTCI 1H-
PULPROG   SpinEchopg30gp.prd
TD         65536
SOLVENT   CDCl3
NS         68
DS         16
SWH        30303.031 Hz
FIDRES     0.462388 Hz
AQ         1.0813940 sec
RG         6502
DW         16.500 usec
DE         6.00 usec
TE         298.0 K
D1         0.25000000 sec
d11        0.03000000 sec
D16        0.00020000 sec
d17        0.00019600 sec
MCREST     0.00000000 sec
MCMRXX     0.01500000 sec
P2         33.10 usec

===== CHANNEL f1 =====
NUC1       13c
P1         16.55 usec
P11        500.00 usec
P12        2000.00 usec
PL0        120.00 dB
PL1        -1.00 dB
SFO1       125.7942548 MHz
SF1        2.70 dB
SF2        2.70 dB
SFOFF1     Crp60,0.5,20.1
SFOFF2     Crp60comp,4
SPOFF1     0.00 Hz
SPOFF2     0.00 Hz

===== CHANNEL f2 =====
CPDPRG2    waltz16
NUC2       1H
PCPD2     100.00 usec
PL2       1.60 dB
PL12      24.50 dB
SFO2      500.2225011 MHz

===== GRADIENT CHANNEL =====
GENAM1     SINE.100
GENAM2     SINE.100
GFX1       0.00 %
GFX2       0.00 %
GPY1       0.00 %
GPY2       0.00 %
GPZ1       30.00 %
GPZ2       50.00 %
p15        500.00 usec
p16        1000.00 usec

F2 - Processing parameters
SI         65536
SF         125.7804140 MHz
WDW        EM
SSB        0
LB         1.00 Hz
GB         0
PC         2.00

ID NMR plot parameters
CX         22.80 cm
CY         15.65 cm
F1P        230.637 ppm
F1         29009.68 Hz
F2P        -10.287 ppm
F2         -1293.96 Hz
PFMCM      10.56688 ppm/cm
HZCM       1329.10693 Hz/cm
    
```

<sup>1</sup>H spectrum

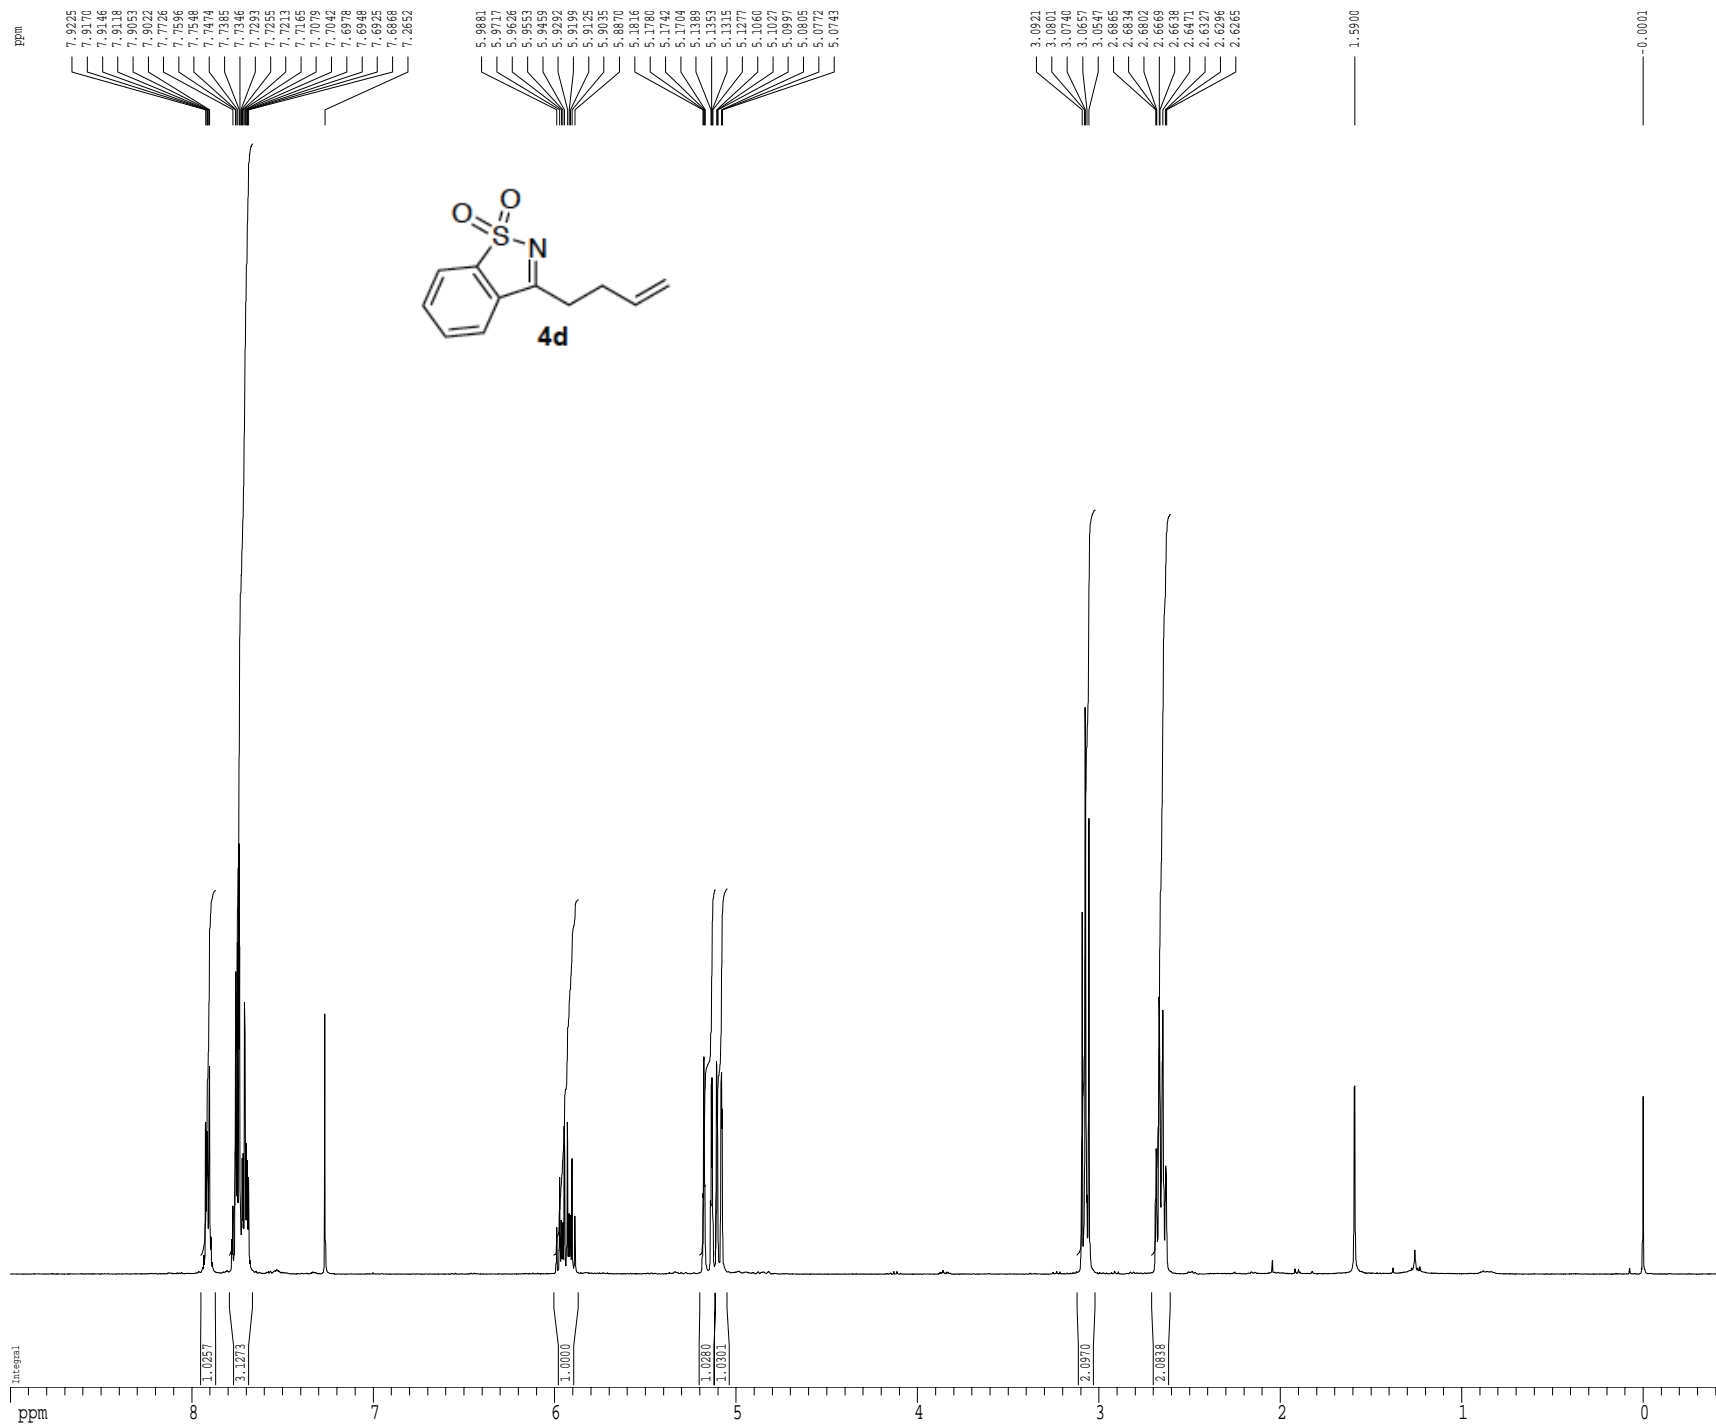

Current Data Parameters  
 USER osborn  
 NAME CAO-III-224-SI  
 EXPNO 2  
 PROCNO 1

F2 - Acquisition Parameters  
 Date\_ 20150715  
 Time 7.49  
 INSTRUM drx400  
 PROBHD 5 mm QNP H/P/P  
 PULPROG zg30  
 TD 65536  
 SOLVENT CDCl3  
 NS 8  
 DS 2  
 SWH 6410.256 Hz  
 FIDRES 0.097813 Hz  
 AQ 5.1118579 sec  
 RG 287.4  
 DW 78.000 usec  
 DE 4.50 usec  
 TE 298.0 K  
 D1 0.10000000 sec  
 MCREST 0.00000000 sec  
 MCWREK 0.01500000 sec

===== CHANNEL f1 =====  
 NUC1 1H  
 P1 12.00 usec  
 PL1 0.00 dB  
 SF01 400.1328009 MHz

F2 - Processing parameters  
 SI 65536  
 SF 400.1300196 MHz  
 WDW EM  
 SSB 0  
 LB 0.30 Hz  
 GB 0  
 PC 2.00

1D NMR plot parameters  
 CX 22.80 cm  
 CY 7.50 cm  
 F1P 9.000 ppm  
 F1 3601.17 Hz  
 F2P -0.500 ppm  
 F2 -200.06 Hz  
 PPMCM 0.41667 ppm/cm  
 HZCM 166.72084 Hz/cm

<sup>13</sup>C spectrum with <sup>1</sup>H decoupling

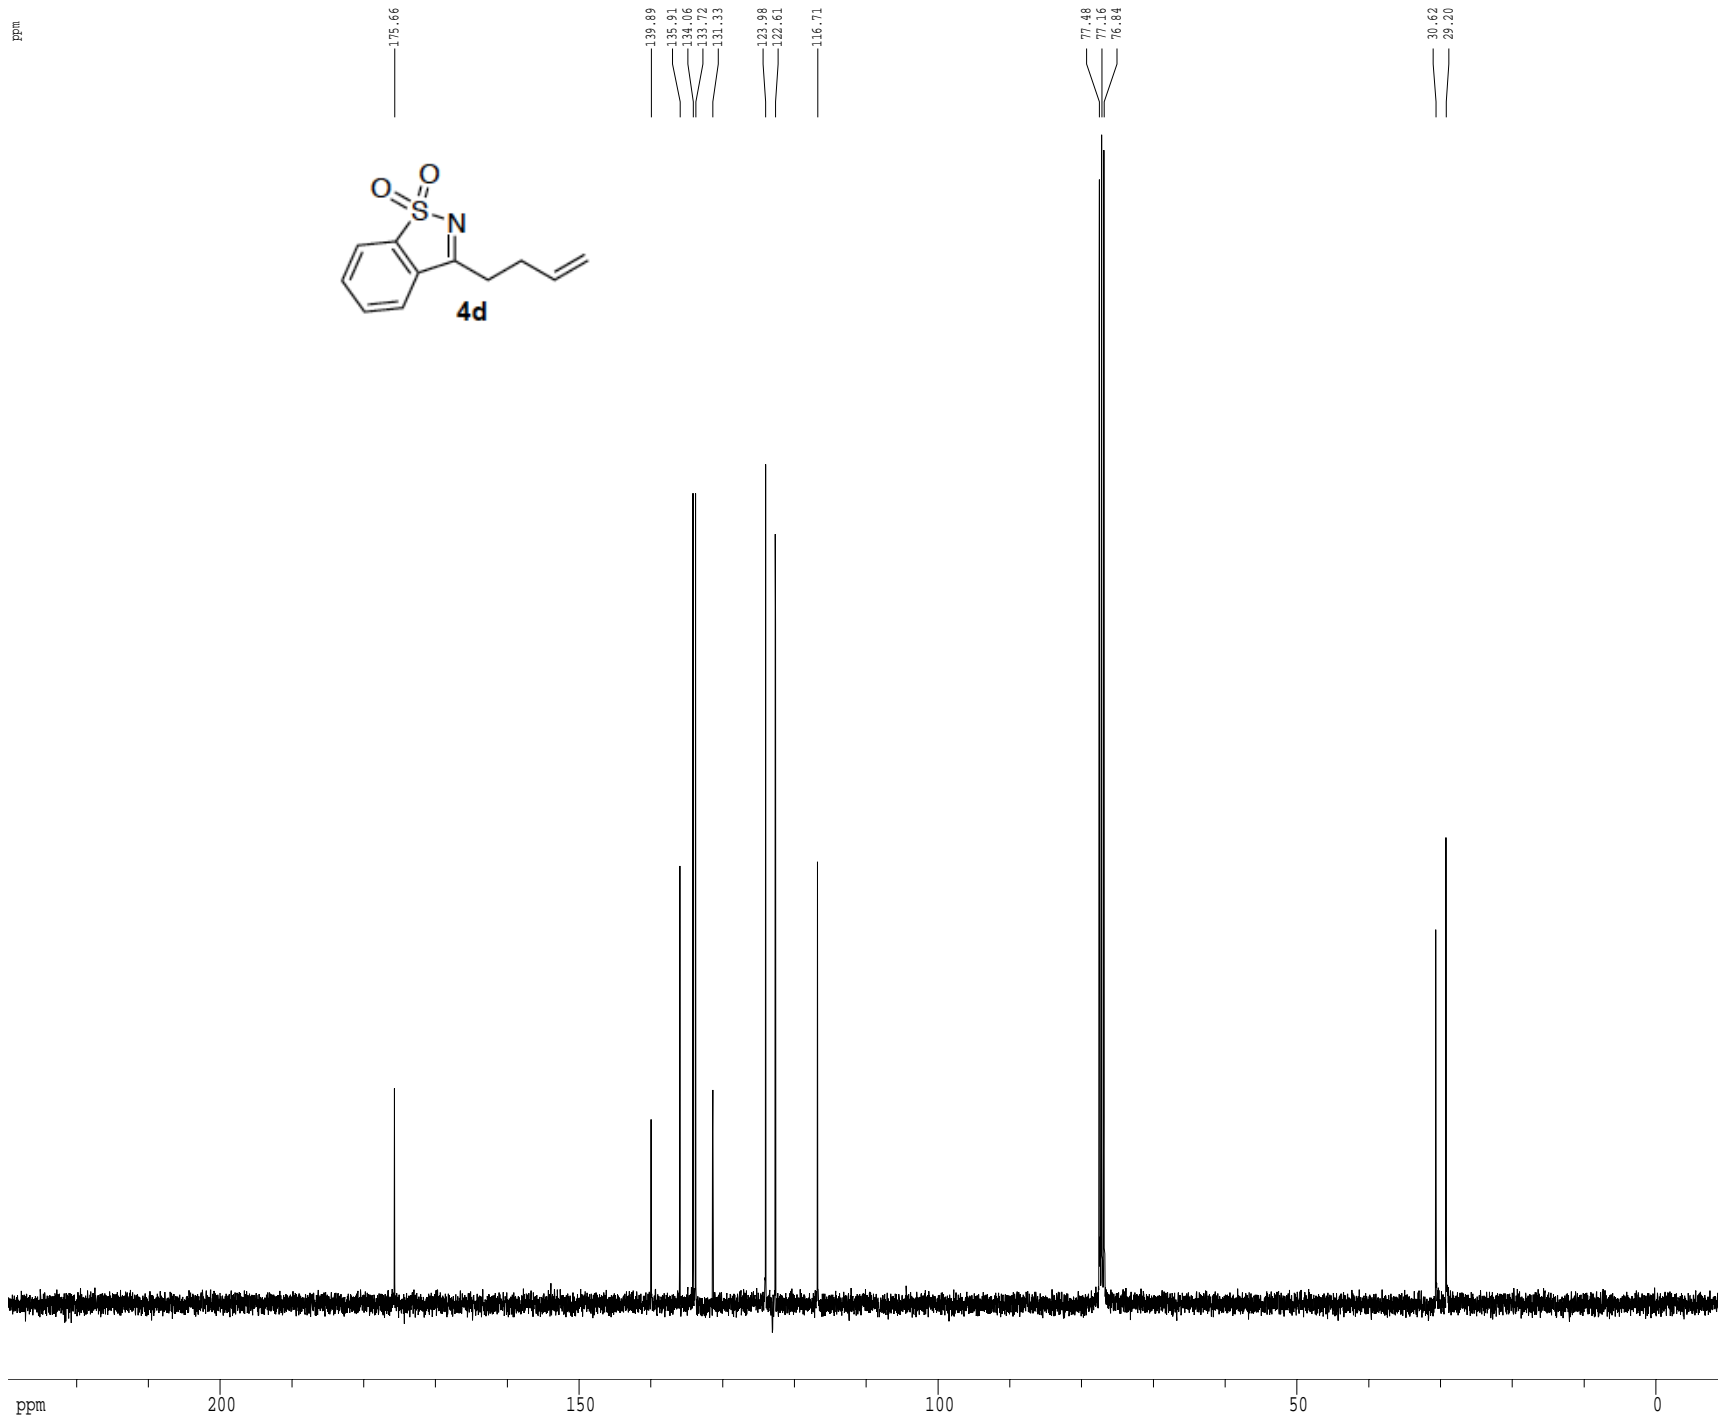

```

Current Data Parameters
USER      osborn
NAME      CAO-III-224-SI
EXNO      3
PROCNO    1

F2 - Acquisition Parameters
Date_     20150715
Time      7.57
INSTRUM   drx400
PROBHD    5 mm QNP H/P/P
PULPROG   zgdc30
TD         65536
SOLVENT   CDCl3
NS         1024
DS         4
SWH        24154.590 Hz
FIDRES     0.368570 Hz
AQ         1.3566452 sec
RG         13004
DW         20.700 usec
DE         20.39 usec
TE         298.0 K
D1         0.10000000 sec
d11        0.03000000 sec
MCREST     0.00000000 sec
MCWREK     0.01500000 sec

===== CHANNEL f1 =====
NUC1       13C
P1         7.75 usec
PL1        -3.00 dB
SF01       100.6237964 MHz

===== CHANNEL f2 =====
CPDPRG2    mlev16
NUC2       1H
PCPD2      90.00 usec
PL2        0.00 dB
PL12       17.70 dB
SFO2       400.1328009 MHz

F2 - Processing parameters
SI         65536
SF         100.6127606 MHz
WDW        EM
SSB        0
LB         1.00 Hz
GB         0
PC         1.00

ID NMR plot parameters
CX         22.80 cm
CY         15.50 cm
FIP        229.496 ppm
F1         23090.21 Hz
F2P        -10.579 ppm
F2         -1064.37 Hz
PFMCM      10.52959 ppm/cm
HZCM       1059.41150 Hz/cm
    
```

<sup>1</sup>H spectrum

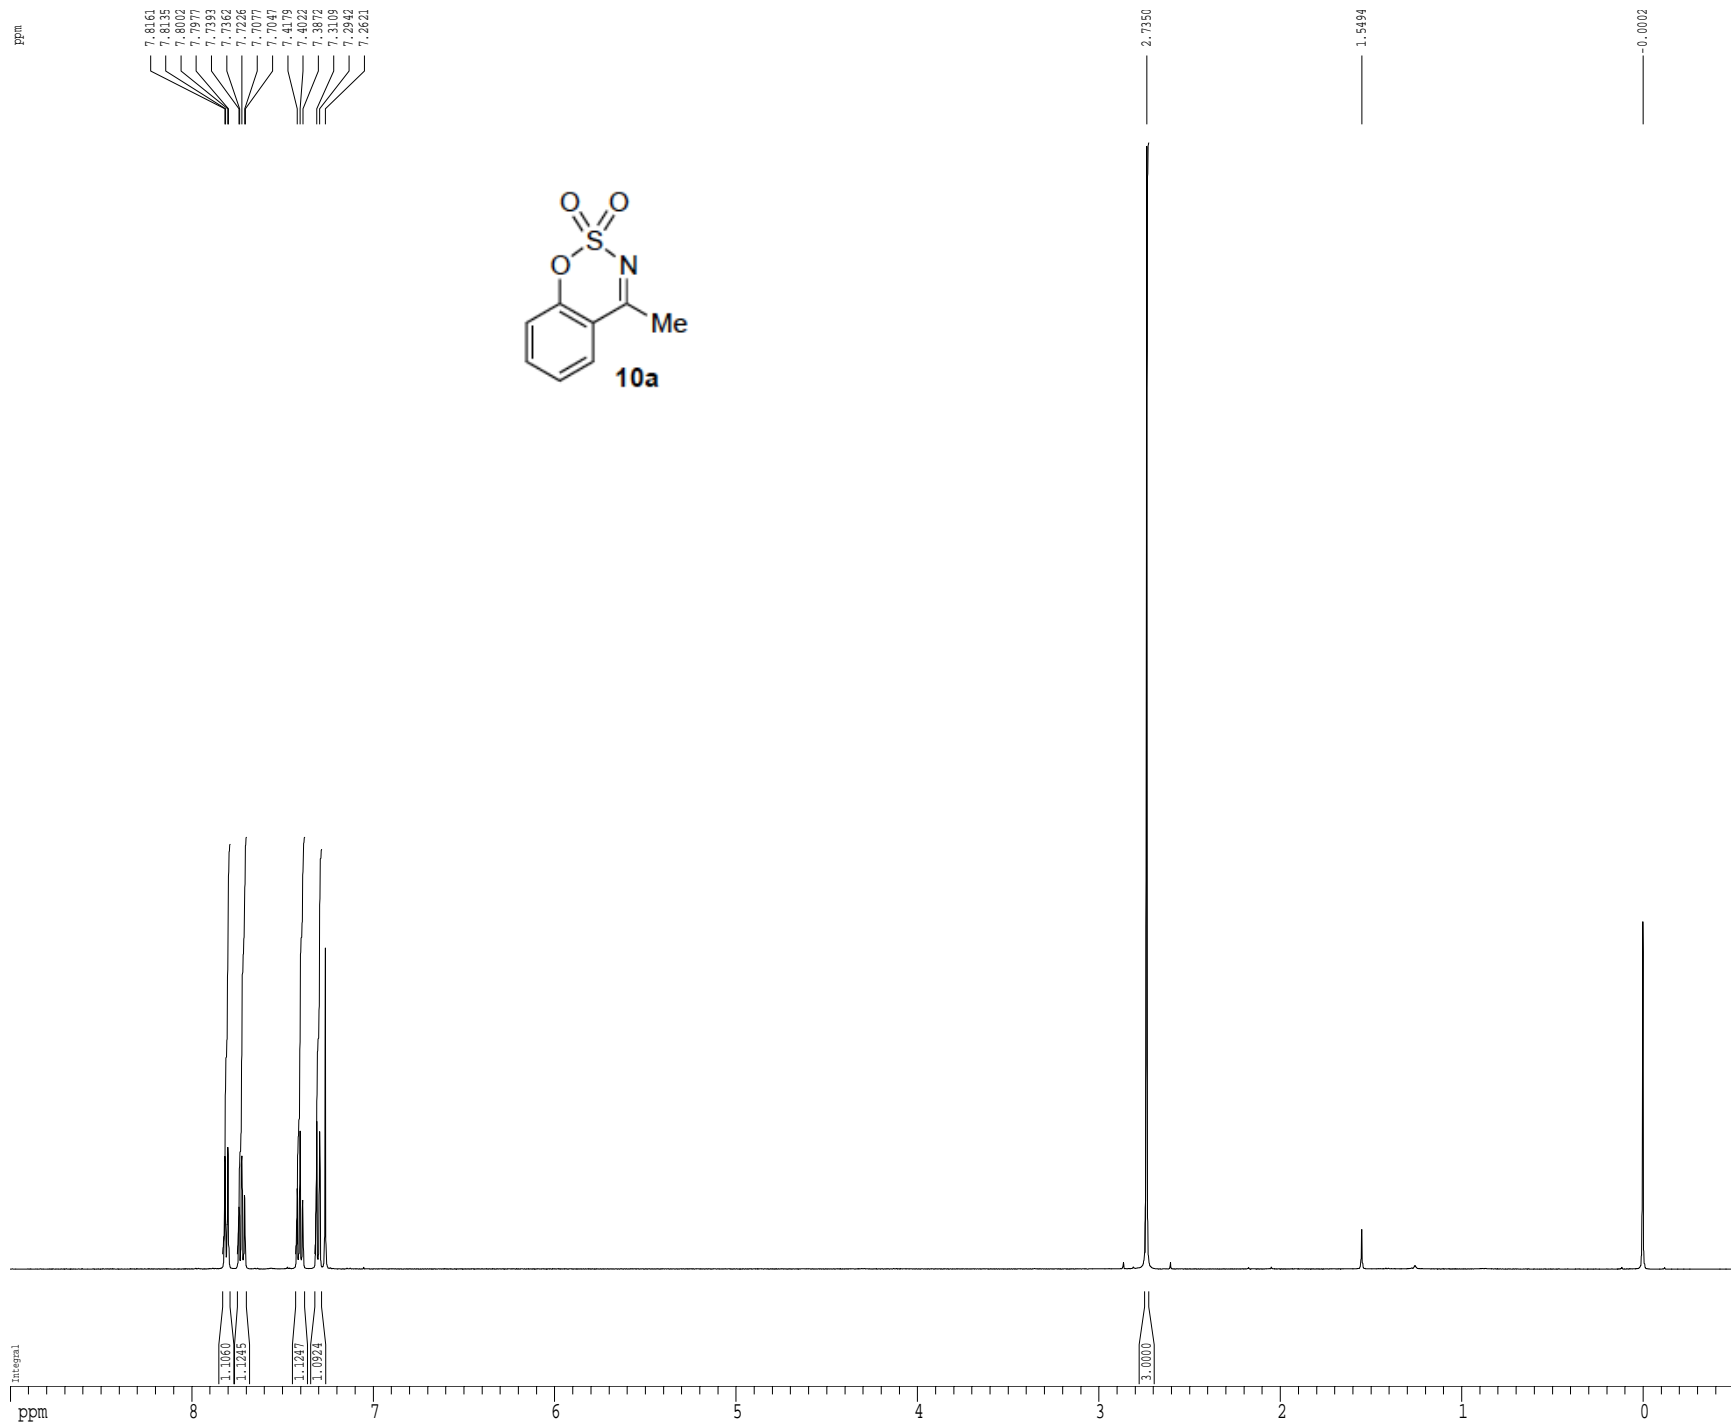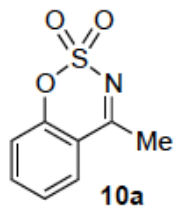

Current Data Parameters  
 USER endean  
 NAME TBDE-I-169-pure-char  
 EXPNO 1  
 PROCNO 1

F2 - Acquisition Parameters  
 Date\_ 20150509  
 Time\_ 20.51  
 INSTRUM cryo500  
 PROBHD 5 mm CPTCI 1H-  
 PULPROG zg30  
 TD 61728  
 SOLVENT CDCl3  
 NS 8  
 DS 2  
 SWH 8012.820 Hz  
 FIDRES 0.098043 Hz  
 AQ 5.0998774 sec  
 RG 6.3  
 DW 62.400 usec  
 DE 6.00 usec  
 TE 298.0 K  
 DL 0.10000000 sec  
 MCREST 0.00000000 sec  
 MCWRR 0.01500000 sec

\*\*\*\*\* CHANNEL f1 \*\*\*\*\*  
 NUC1 1H  
 P1 7.50 usec  
 PL1 1.60 Gb  
 SFO1 500.2235015 MHz

F2 - Processing parameters  
 SI 65536  
 SF 500.2200297 MHz  
 WDW EM  
 SSB 0  
 LB 0.30 Hz  
 GB 0  
 PC 4.00

1D NMR plot parameters  
 CX 22.80 cm  
 CY 15.00 cm  
 FIP 9.000 ppm  
 F1 4501.98 Hz  
 F2P -0.500 ppm  
 F2 -250.11 Hz  
 PPMCM 0.41667 ppm/cm  
 HZCM 208.42502 Hz/cm

Z-restored spin-echo 13C spectrum with 1H decoupling

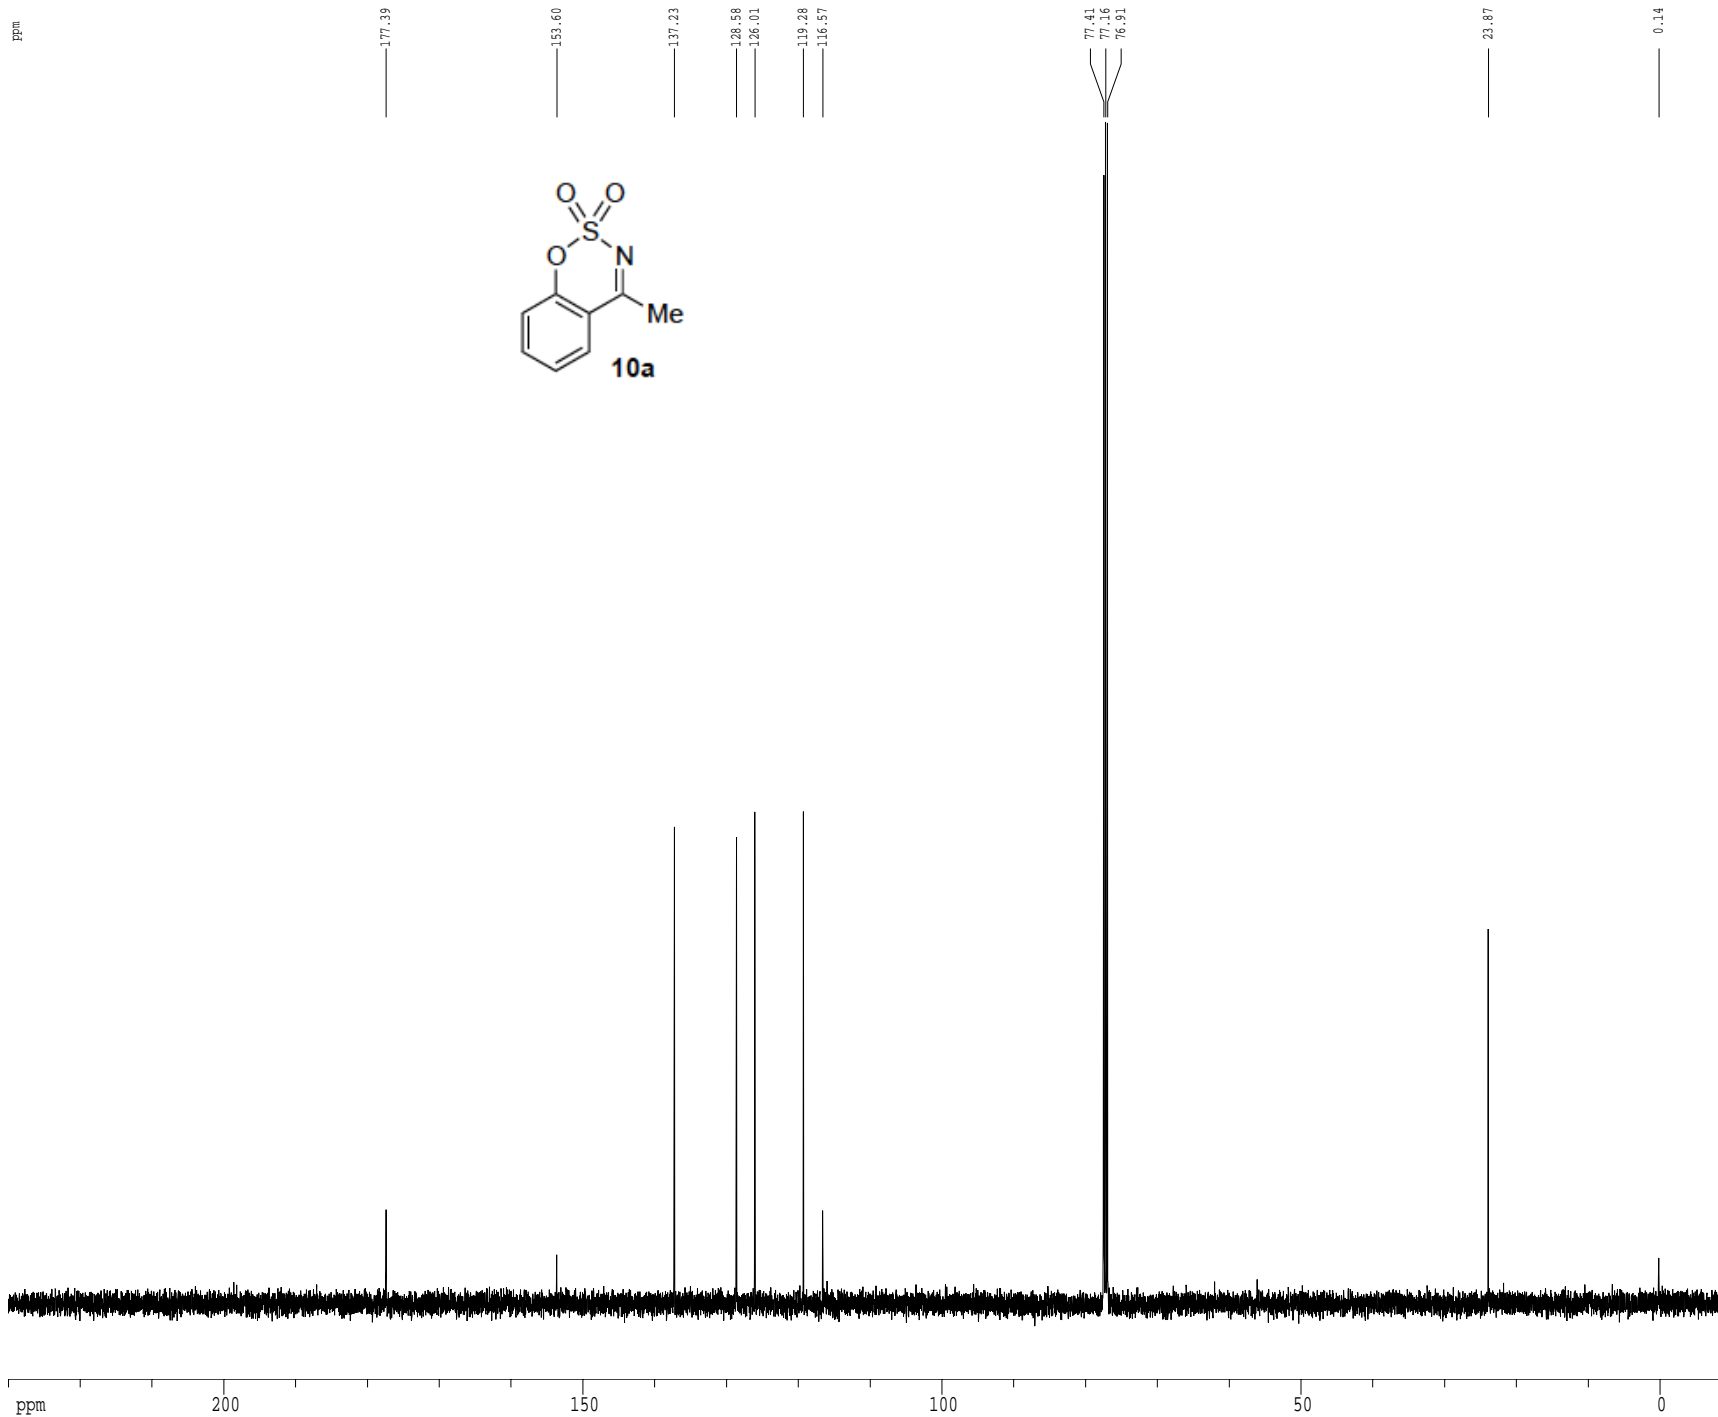

```

Current Data Parameters
USER          endean
NAME          TBDE-I-169-pure-char
EXPNO        2
PROCNO       1

F2 - Acquisition Parameters
Date_        20150509
Time         20.55
INSTRUM      cryo500
PROBHD       5 mm CP131H-
PULPROG      SpinEchoes30sp.prd
TD           65536
SOLVENT      CDCl3
NS           424
DS           16
SWH          30303.031 Hz
FIDRES      0.462398 Hz
AQ           1.0813940 sec
RG           7298.2
DW           16.500 usec
DE           6.00 usec
TE           298.0 K
D1           0.25000000 sec
d11          0.03000000 sec
D16          0.00020000 sec
d17          0.00019600 sec
MCREST       0.00000000 sec
MCWRK        0.01500000 sec
F2           33.10 usec

===== CHANNEL f1 =====
NUC1          13C
P1           16.55 usec
P11          500.00 usec
P12          2000.00 usec
PL0          120.00 dB
PL1          -1.00 dB
SFO1         125.7942548 MHz
SP1          2.70 dB
SP2          2.70 dB
SFO2         Crp60,0.5,20.1
SFO3         Crp60comp,4
SPOFF1       0.00 Hz
SPOFF2       0.00 Hz

===== CHANNEL f2 =====
CFDPRG2      waltz16
NUC2          1H
PCPD2        100.00 usec
PL2          1.60 dB
PL12         24.50 dB
SFO2         500.2225011 MHz

===== GRADIENT CHANNEL =====
GPNAM1       SINE.100
GPNAM2       SINE.100
GPX1         0.00 %
GPX2         0.00 %
GPY1         0.00 %
GPY2         0.00 %
GPZ1         30.00 %
GPZ2         50.00 %
p15          500.00 usec
p16          1000.00 usec

F2 - Processing parameters
SI           65536
SF           125.7804080 MHz
WDW          EM
SSB          0
LB           1.00 Hz
GB           0
PC           2.00

ID NMR plot parameters
CX           22.80 cm
CY           15.65 cm
F1P         230.000 ppm
F1           28929.49 Hz
F2P         -10.000 ppm
F2           -1257.80 Hz
PPMCM       10.52632 ppm/cm
HZCM        1324.00439 Hz/cm
    
```

<sup>1</sup>H spectrum

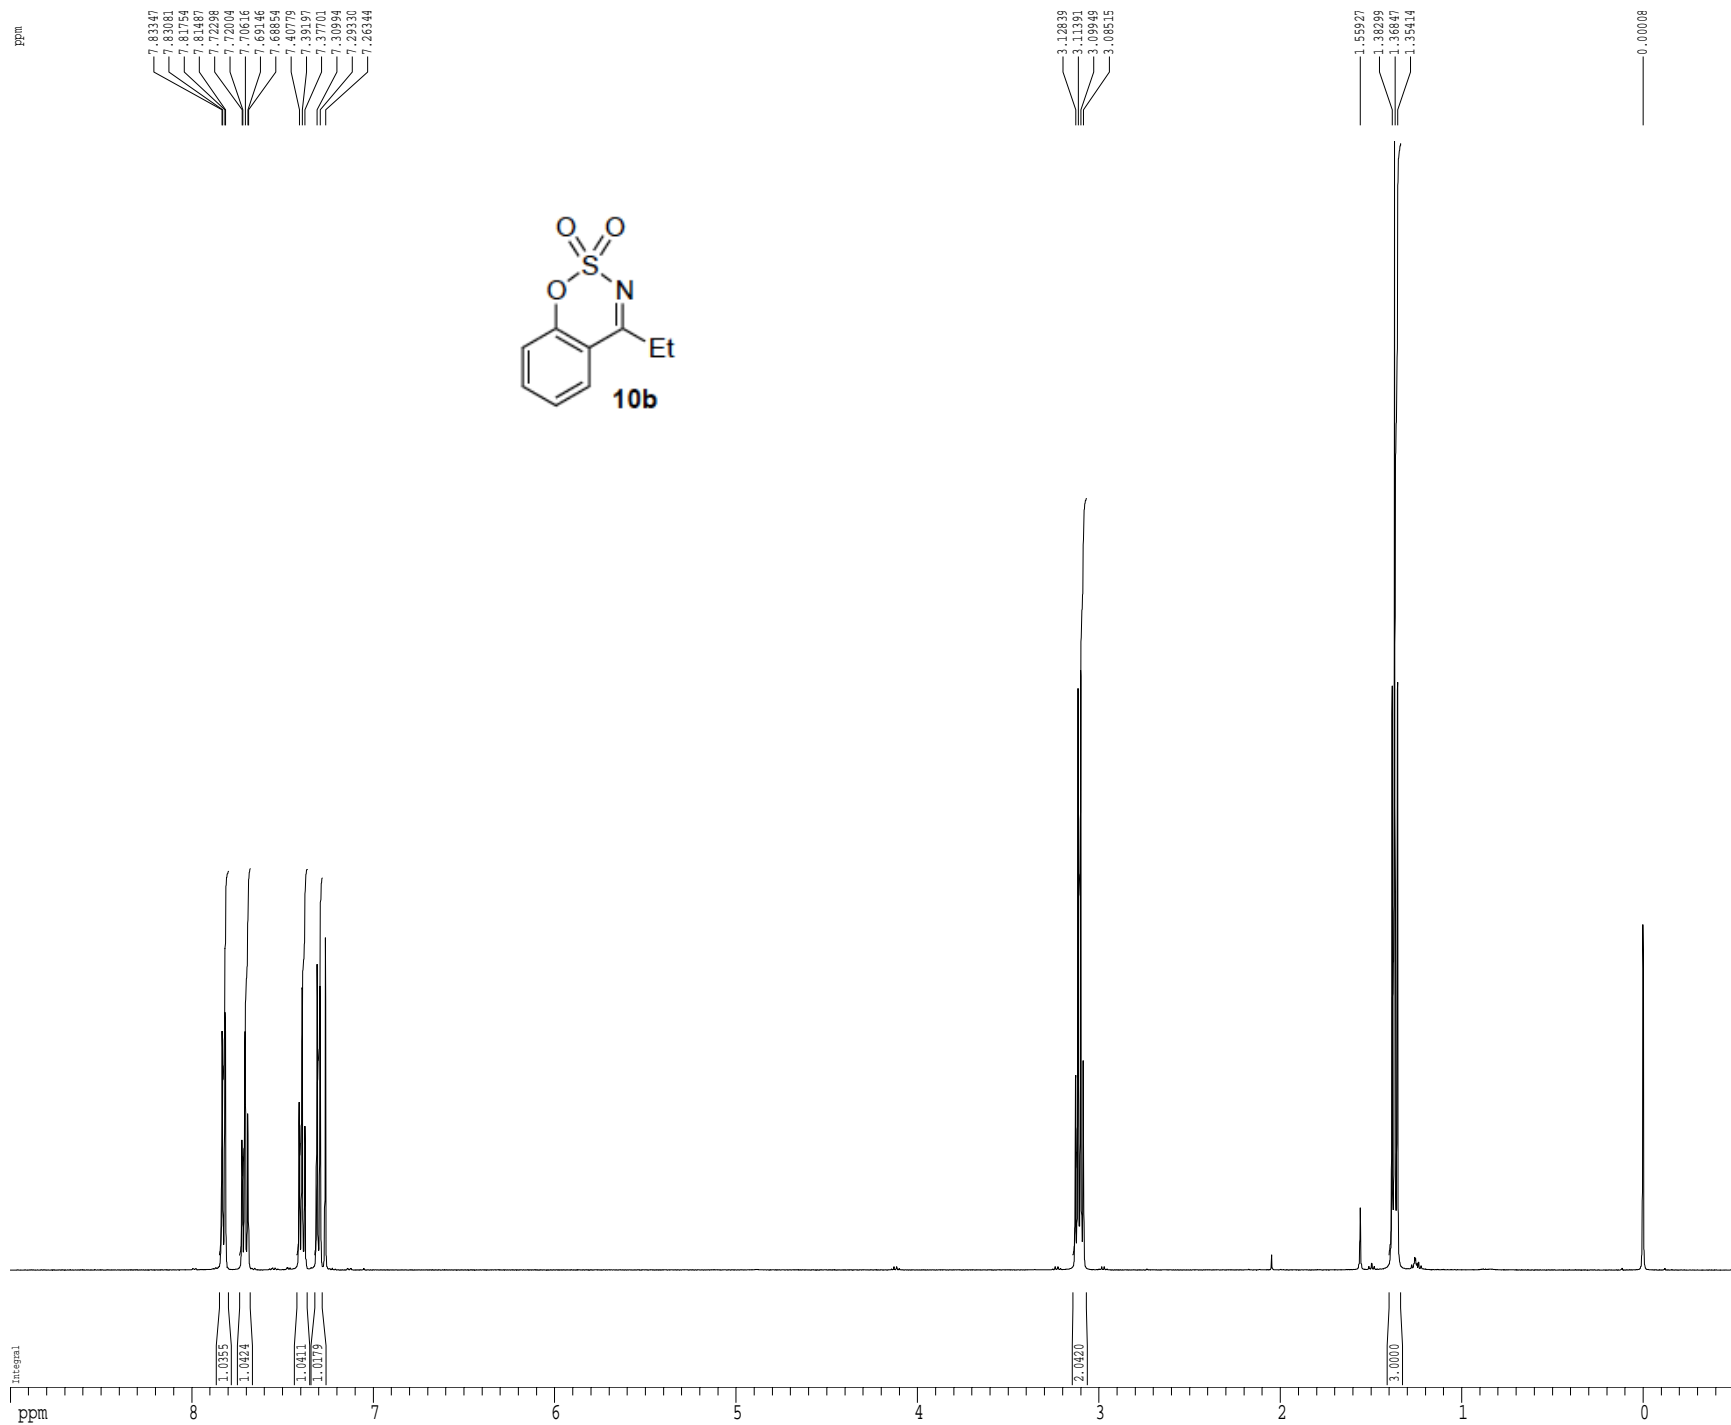

Current Data Parameters  
 USER endean  
 NAME TBDE-I-170-pure-char  
 EXPNO 1  
 PROCNO 1

F2 - Acquisition Parameters  
 Date\_ 20150509  
 Time\_ 21.06  
 INSTRUM cryo500  
 PROBHD 5 mm CPTCI 1H-  
 PULPROG zg30  
 TD 61728  
 SOLVENT CDCl3  
 NS 8  
 DS 2  
 SWH 8012.820 Hz  
 FIDRES 0.098043 Hz  
 AQ 5.0998774 sec  
 RG 7.1  
 DW 62.400 usec  
 DE 6.00 usec  
 TE 298.0 K  
 DL 0.10000000 sec  
 MCREST 0.00000000 sec  
 MCWRR 0.01500000 sec

===== CHANNEL f1 =====  
 NUC1 1H  
 P1 7.50 usec  
 PL1 1.60 Gb  
 SFO1 500.2235015 MHz

F2 - Processing parameters  
 SI 65536  
 SF 500.2200289 MHz  
 WDW EM  
 SSB 0  
 LB 0.30 Hz  
 GB 0  
 PC 4.00

1D NMR plot parameters  
 CX 22.80 cm  
 CY 15.00 cm  
 FIP 9.000 ppm  
 F1 4501.98 Hz  
 F2P -0.500 ppm  
 F2 -250.11 Hz  
 PPMCM 0.41667 ppm/cm  
 HZCM 208.42502 Hz/cm

Z-restored spin-echo 13C spectrum with 1H decoupling

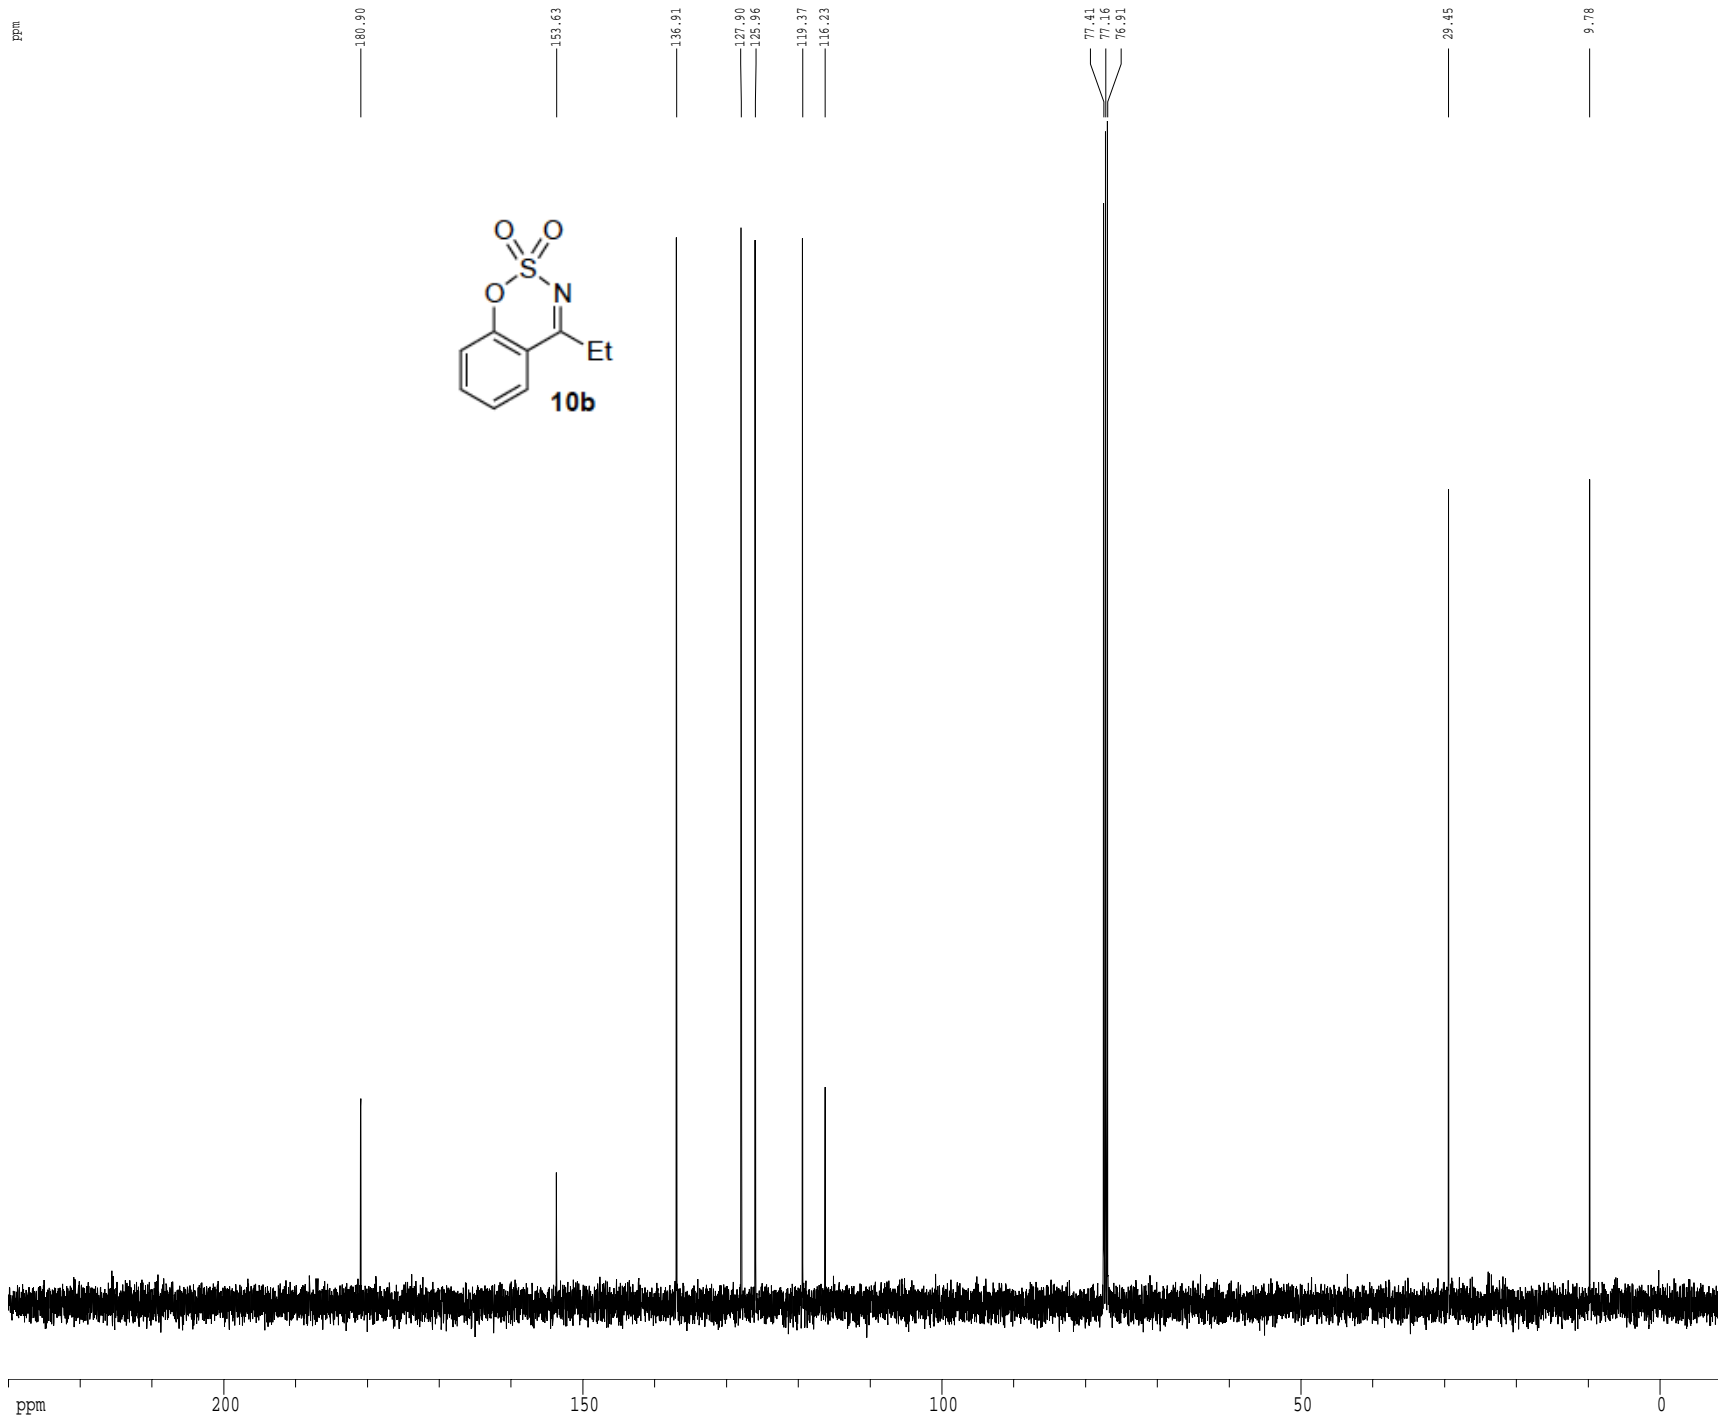

```

Current Data Parameters
USER      endean
NAME      TBDE-I-170-pure-char
EXPNO     2
PROCNO    1

F2 - Acquisition Parameters
Date_     20150509
Time      21.12
INSTRUM   cryo500
PROBHD    5 mm CP131H-
PULPROG   SpinEchops30sp.prd
TD         65536
SOLVENT   CDCl3
NS         184
DS         16
SWH        30303.031 Hz
FIDRES     0.462398 Hz
AQ         1.0813940 sec
RG         8192
DW         16.500 usec
DE         6.00 usec
TE         298.0 K
d1         0.25000000 sec
d11        0.03000000 sec
d16        0.00020000 sec
d17        0.00019600 sec
MCREST     0.00000000 sec
MCWRK     0.01500000 sec
P2         33.10 usec

===== CHANNEL f1 =====
NUC1       13C
P1         16.55 usec
P11        500.00 usec
P12        2000.00 usec
PL0        120.00 dB
PL1        -1.00 dB
SP01      125.7942548 MHz
SP1        2.70 dB
SP2        2.70 dB
SFOFF1     Crp60,0.5,20.1
SFOFF2     Crp60comp,4
SFOFF1     0.00 Hz
SFOFF2     0.00 Hz

===== CHANNEL f2 =====
CFDPRG2    waltz16
NUC2       1H
PCPD2      100.00 usec
PL2        1.60 dB
PL12       24.50 dB
SFO2      500.2225011 MHz

===== GRADIENT CHANNEL =====
GPNAM1     SINE.100
GPNAM2     SINE.100
GPY1       0.00 %
GPX2       0.00 %
GPY2       0.00 %
GPZ1       30.00 %
GPZ2       50.00 %
p15        500.00 usec
p16        1000.00 usec

F2 - Processing parameters
SI         65536
SF         125.7804090 MHz
WDW        EM
SSB        0
LB         1.00 Hz
GB         0
PC         2.00

ID NMR plot parameters
CX         22.80 cm
CY         15.65 cm
F1P        230.000 ppm
F1         28929.49 Hz
F2P        -10.000 ppm
F2         -1257.80 Hz
PPMCM      10.52632 ppm/cm
HZCM       1324.00439 Hz/cm
    
```

<sup>1</sup>H spectrum

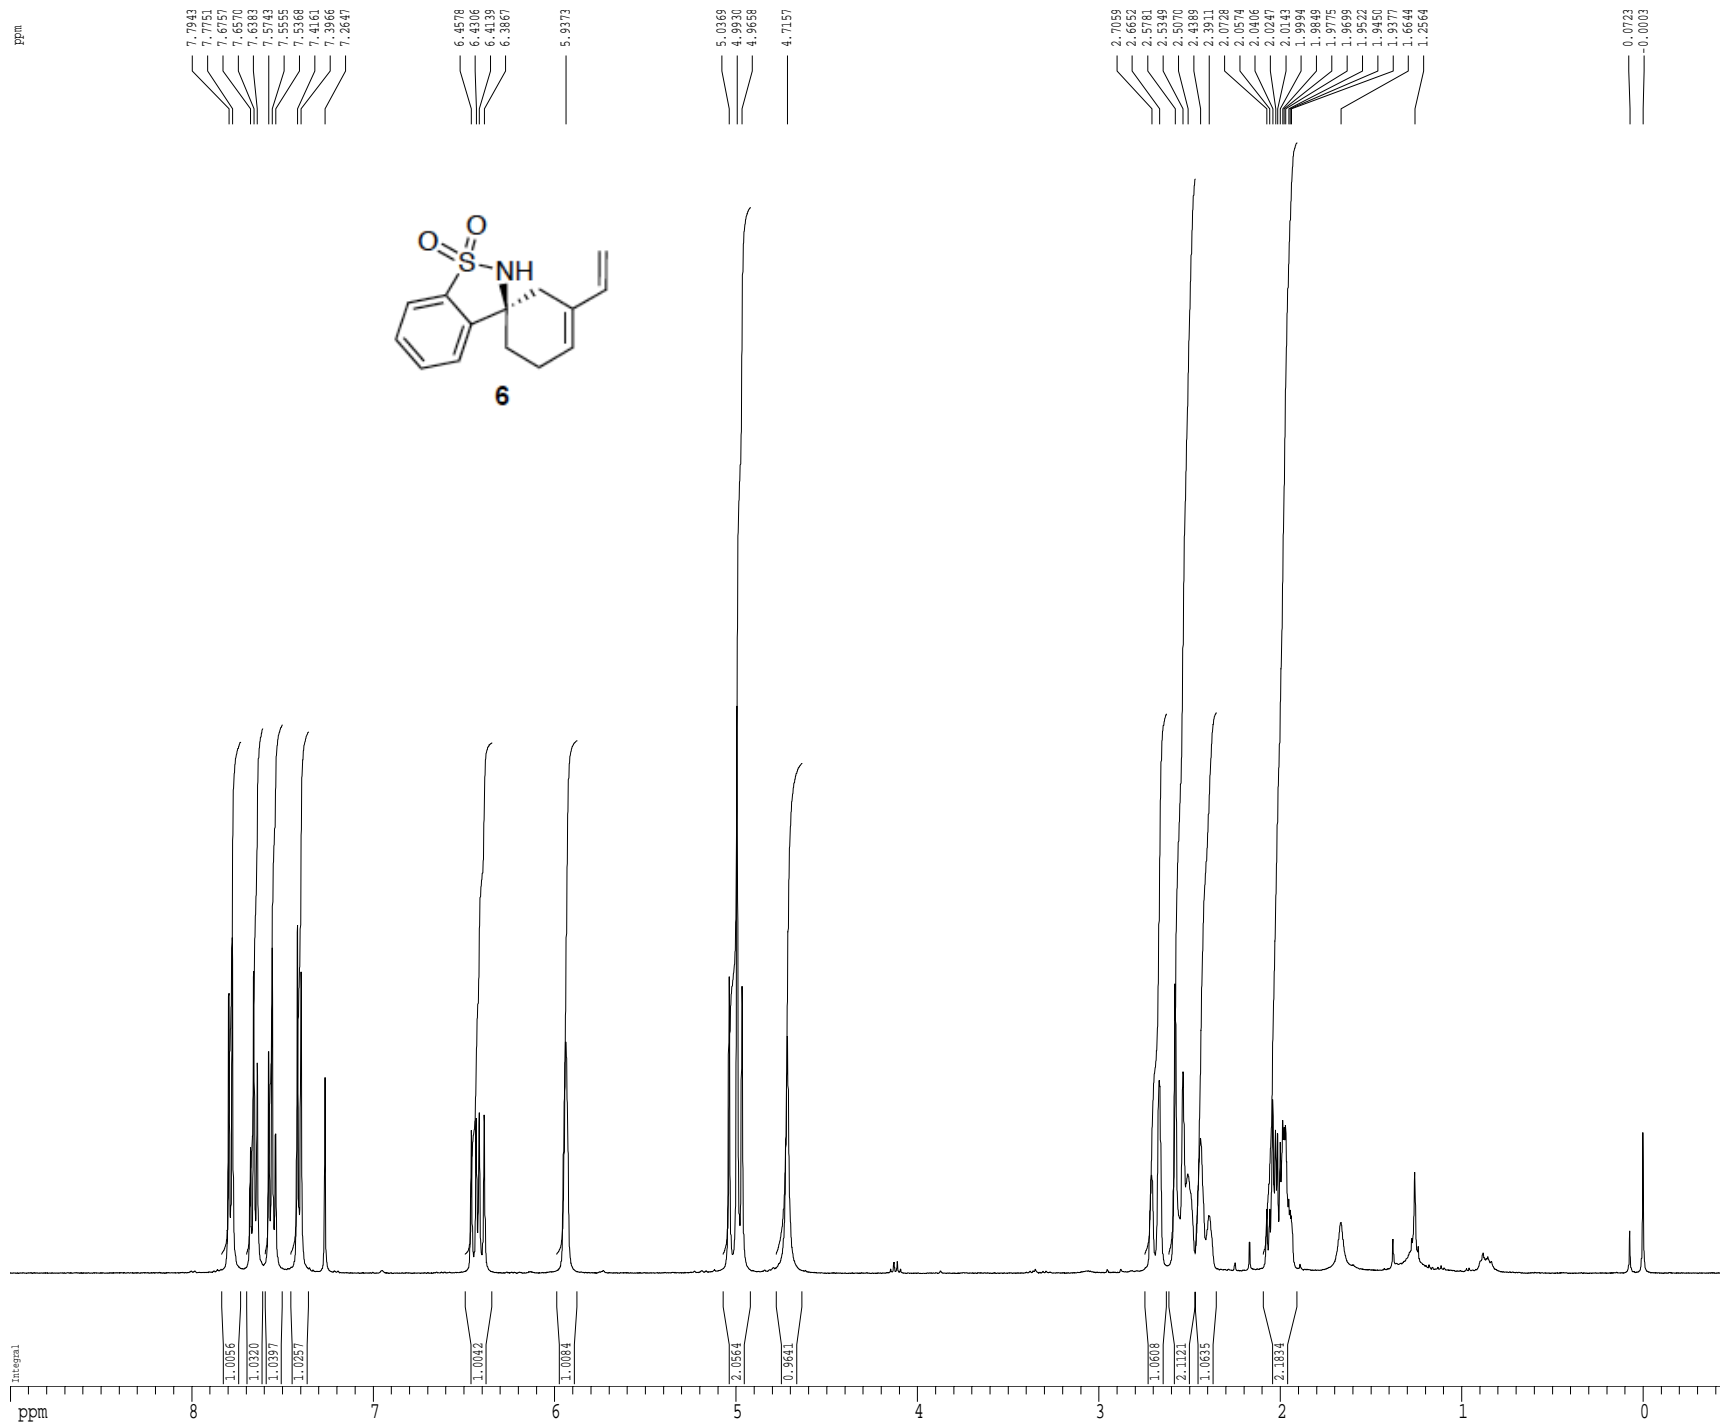

Current Data Parameters  
 USER osborn  
 NAME CAO-III-233-pure  
 EXPNO 2  
 PROCNO 1

F2 - Acquisition Parameters  
 Date\_ 20150719  
 Time 15.03  
 INSTRUM drx400  
 PROBHD 5 mm QNP H/P/P  
 PULPROG zg30  
 TD 65536  
 SOLVENT CDCl3  
 NS 8  
 DS 2  
 SWH 6410.256 Hz  
 FIDRES 0.097813 Hz  
 AQ 5.1118579 sec  
 RG 181  
 DW 78.000 usec  
 DE 4.50 usec  
 TE 298.0 K  
 D1 0.10000000 sec  
 MCREST 0.00000000 sec  
 MCWREK 0.01500000 sec

===== CHANNEL f1 =====  
 NUC1 <sup>1</sup>H  
 P1 12.00 usec  
 PL1 0.00 dB  
 SF01 400.1328009 MHz

F2 - Processing parameters  
 SI 65536  
 SF 400.1300199 MHz  
 WDW EM  
 SSB 0  
 LB 0.30 Hz  
 GB 0  
 PC 2.00

1D NMR plot parameters  
 CX 22.80 cm  
 CY 7.50 cm  
 F1P 9.000 ppm  
 F1 3601.17 Hz  
 F2P -0.500 ppm  
 F2 -200.06 Hz  
 PPMCM 0.41667 ppm/cm  
 HZCM 166.72084 Hz/cm



Z-restored spin-echo 13C spectrum with 1H decoupling

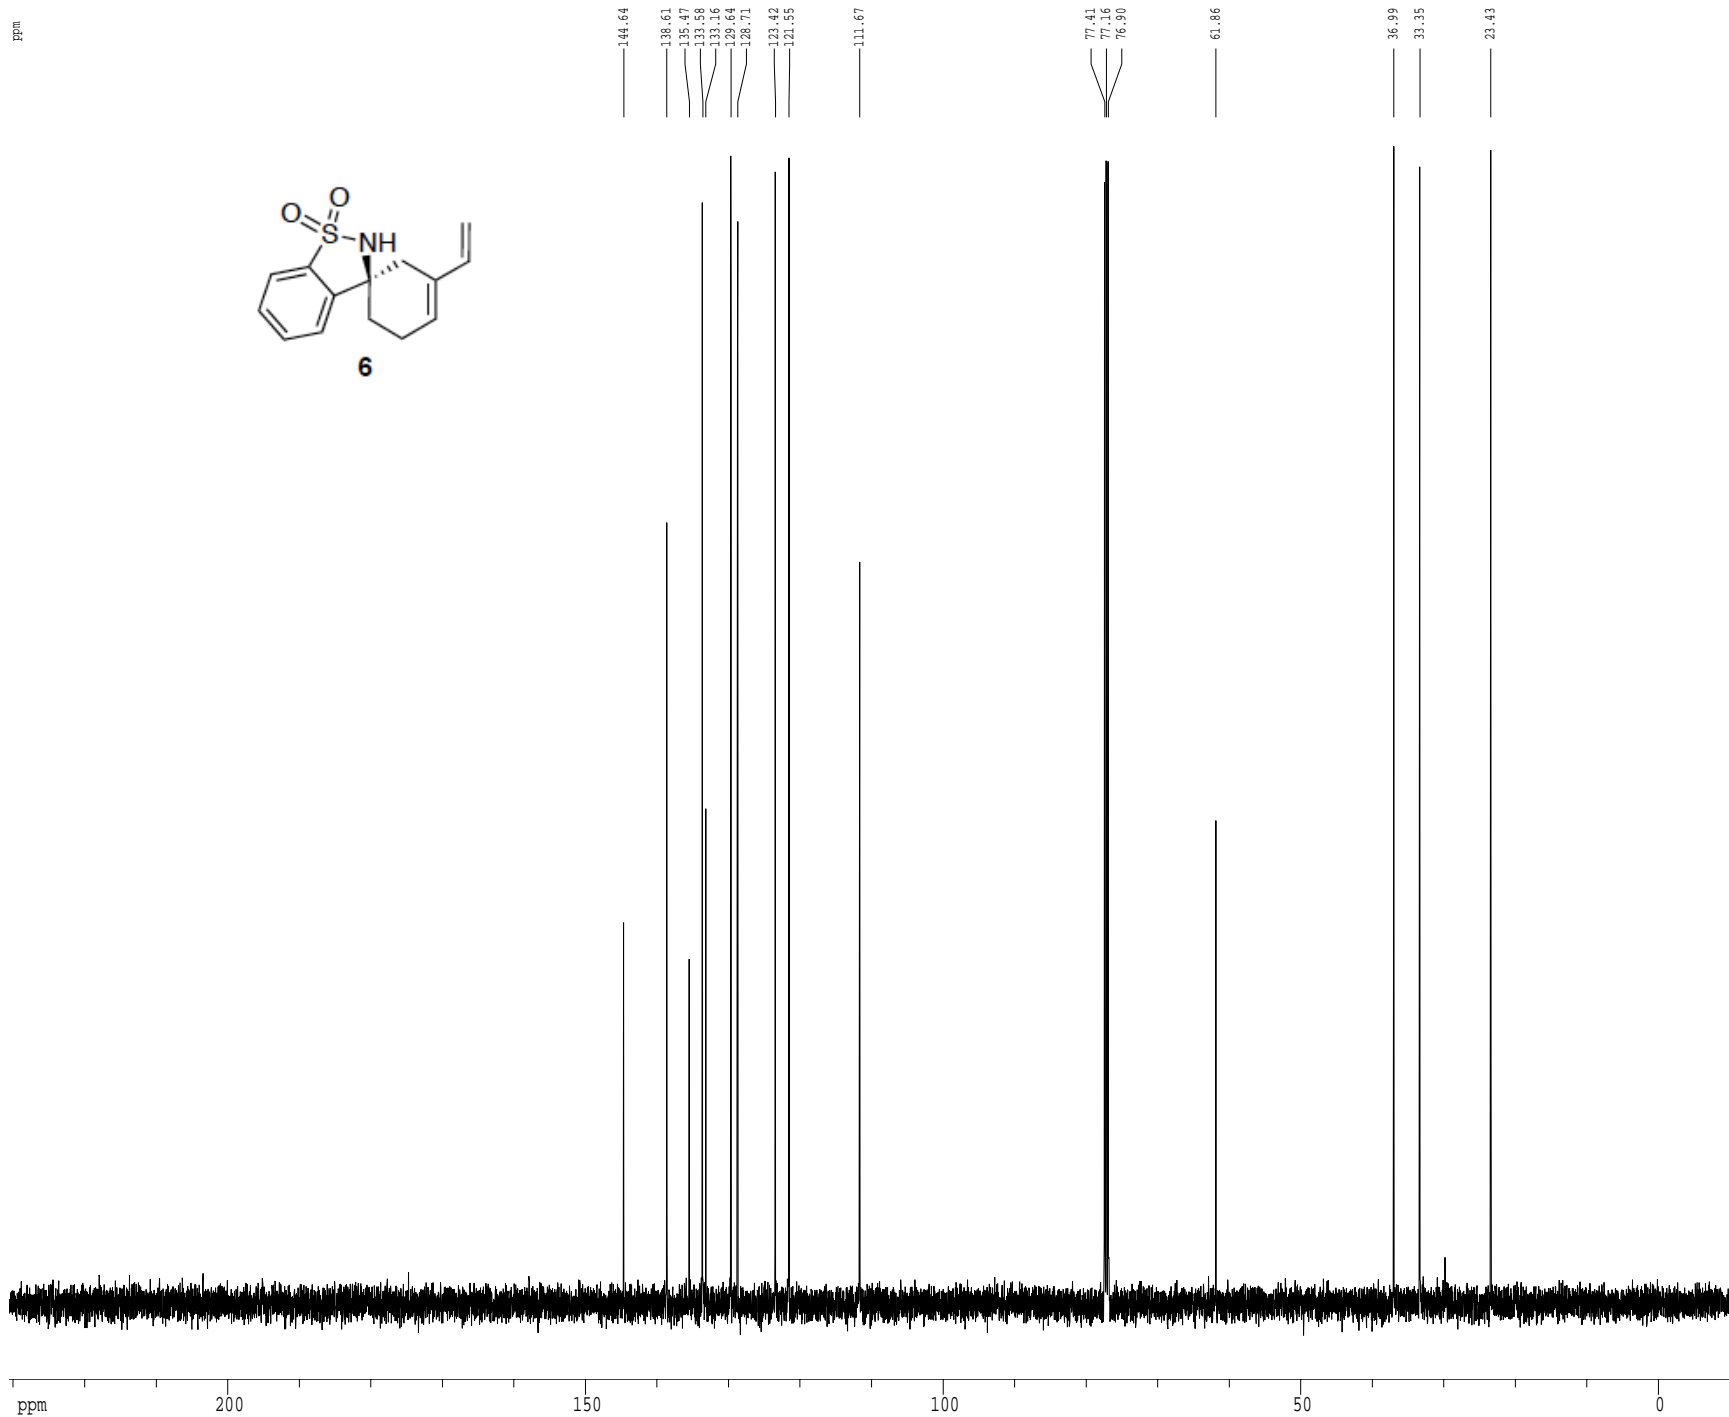

```

Current Data Parameters
USER      osborn
NAME      CAO-III-233-SI
EXPNO     2
PROCNO    1

F2 - Acquisition Parameters
Date_     20150719
Time      16.12
INSTRUM   cryo500
PROBHD    5 mm CPTCI 1H-
PULPROG   SpinEchopg30gp.prd
TD         65536
SOLVENT   CDCl3
NS         77
DS         15
SWH        30303.031 Hz
FIDRES     0.462388 Hz
AQ         1.0813940 sec
RG         2580.3
DW         16.500 usec
DE         6.00 usec
TE         298.0 K
D1         0.25000000 sec
d11        0.03000000 sec
D16        0.00020000 sec
d17        0.00019600 sec
MCREST     0.00000000 sec
MCONR      0.01500000 sec
P2         33.10 usec

===== CHANNEL f1 =====
NUC1       13c
P1         16.55 usec
P11        500.00 usec
P12        2000.00 usec
PL0        120.00 dB
PL1        -1.00 dB
SFO1       125.7942548 MHz
SF1        2.70 dB
SF2        2.70 dB
SFO1M1     Crp60,0.5,20.1
SFO1M2     Crp60comp,4
SFOFF1     0.00 Hz
SFOFF2     0.00 Hz

===== CHANNEL f2 =====
CPDPRG2    waltz16
NUC2       1H
PCPD2      100.00 usec
PL2        1.60 dB
PL12       24.50 dB
SFO2       500.2225011 MHz

===== GRADIENT CHANNEL =====
GPNAM1     SINE.100
GPNAM2     SINE.100
GFX1       0.00 %
GFX2       0.00 %
GPF1       0.00 %
GPF2       0.00 %
GPF3       0.00 %
GPF4       30.00 %
GPF5       50.00 %
p15        500.00 usec
p16        1000.00 usec

F2 - Processing parameters
SI         65536
SF         125.7804122 MHz
WDW        EM
SSB        0
LB         1.00 Hz
GB         0
PC         2.00

ID NMR plot parameters
CX         22.80 cm
CY         15.65 cm
F1P        230.637 ppm
F1         29009.68 Hz
F2P        -10.287 ppm
F2         -1293.96 Hz
PFMCM      10.56688 ppm/cm
HZCM       1329.10693 Hz/cm
    
```

<sup>1</sup>H spectrum

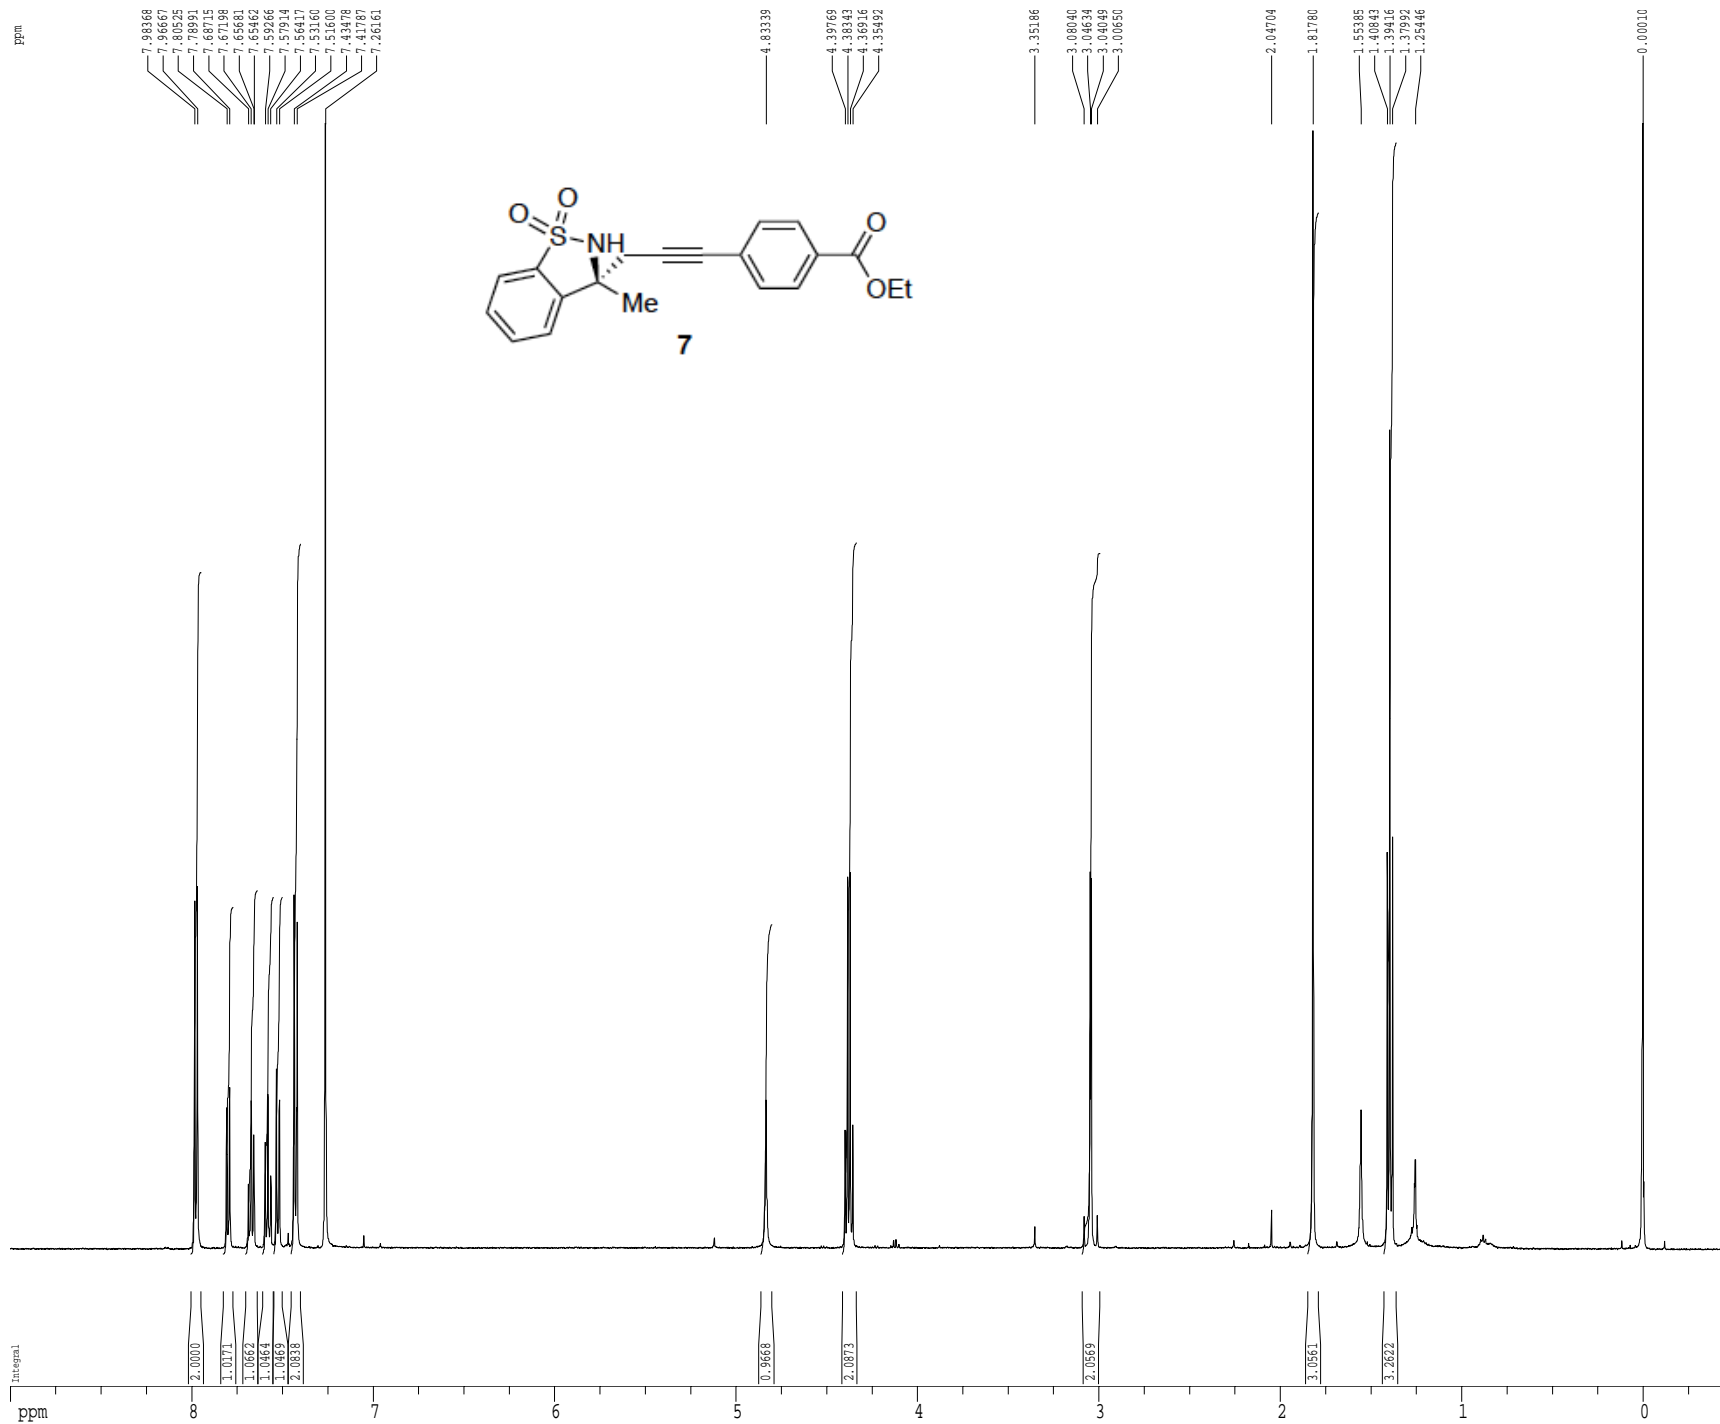

```

Current Data Parameters
USER      endean
NAME      T806-1-219-pure-paper-char
EXNO      2
PROCNO    1

F2 - Acquisition Parameters
Date      20150819
Time      15.49
INSTRUM   cryo500
PROBHD    5 mm CPYCI 1H-
PULPROG   zg30
TD         81728
SOLVENT   CDCl3
NS         8
DS         2
SWH        8012.820 Hz
FIDRES     0.098043 Hz
AQ         5.0998774 sec
RG         8
DW         62.400 usec
DE         6.00 usec
TE         298.0 K
D1         0.10000000 sec
MCREST     0.00000000 sec
MCWREK     0.01500000 sec

***** CHANNEL f1 *****
NUC1       1H
P1         7.50 usec
PL1        1.60 dB
SFO1       500.225015 MHz

F2 - Processing parameters
SI         65536
SF         500.2200394 MHz
WDW        EM
SSB        0
LB         0.30 Hz
GB         0
PC         4.00

ID NMR plot parameters
CY         22.80 cm
CY         30.00 cm
FIP        9.000 ppm
F1         4501.98 Hz
F2P        -0.500 ppm
F2         -250.11 Hz
PPMCM      0.41667 ppm/cm
HZCM       208.42302 Hz/cm
    
```

Z-restored spin-echo 13C spectrum with 1H decoupling

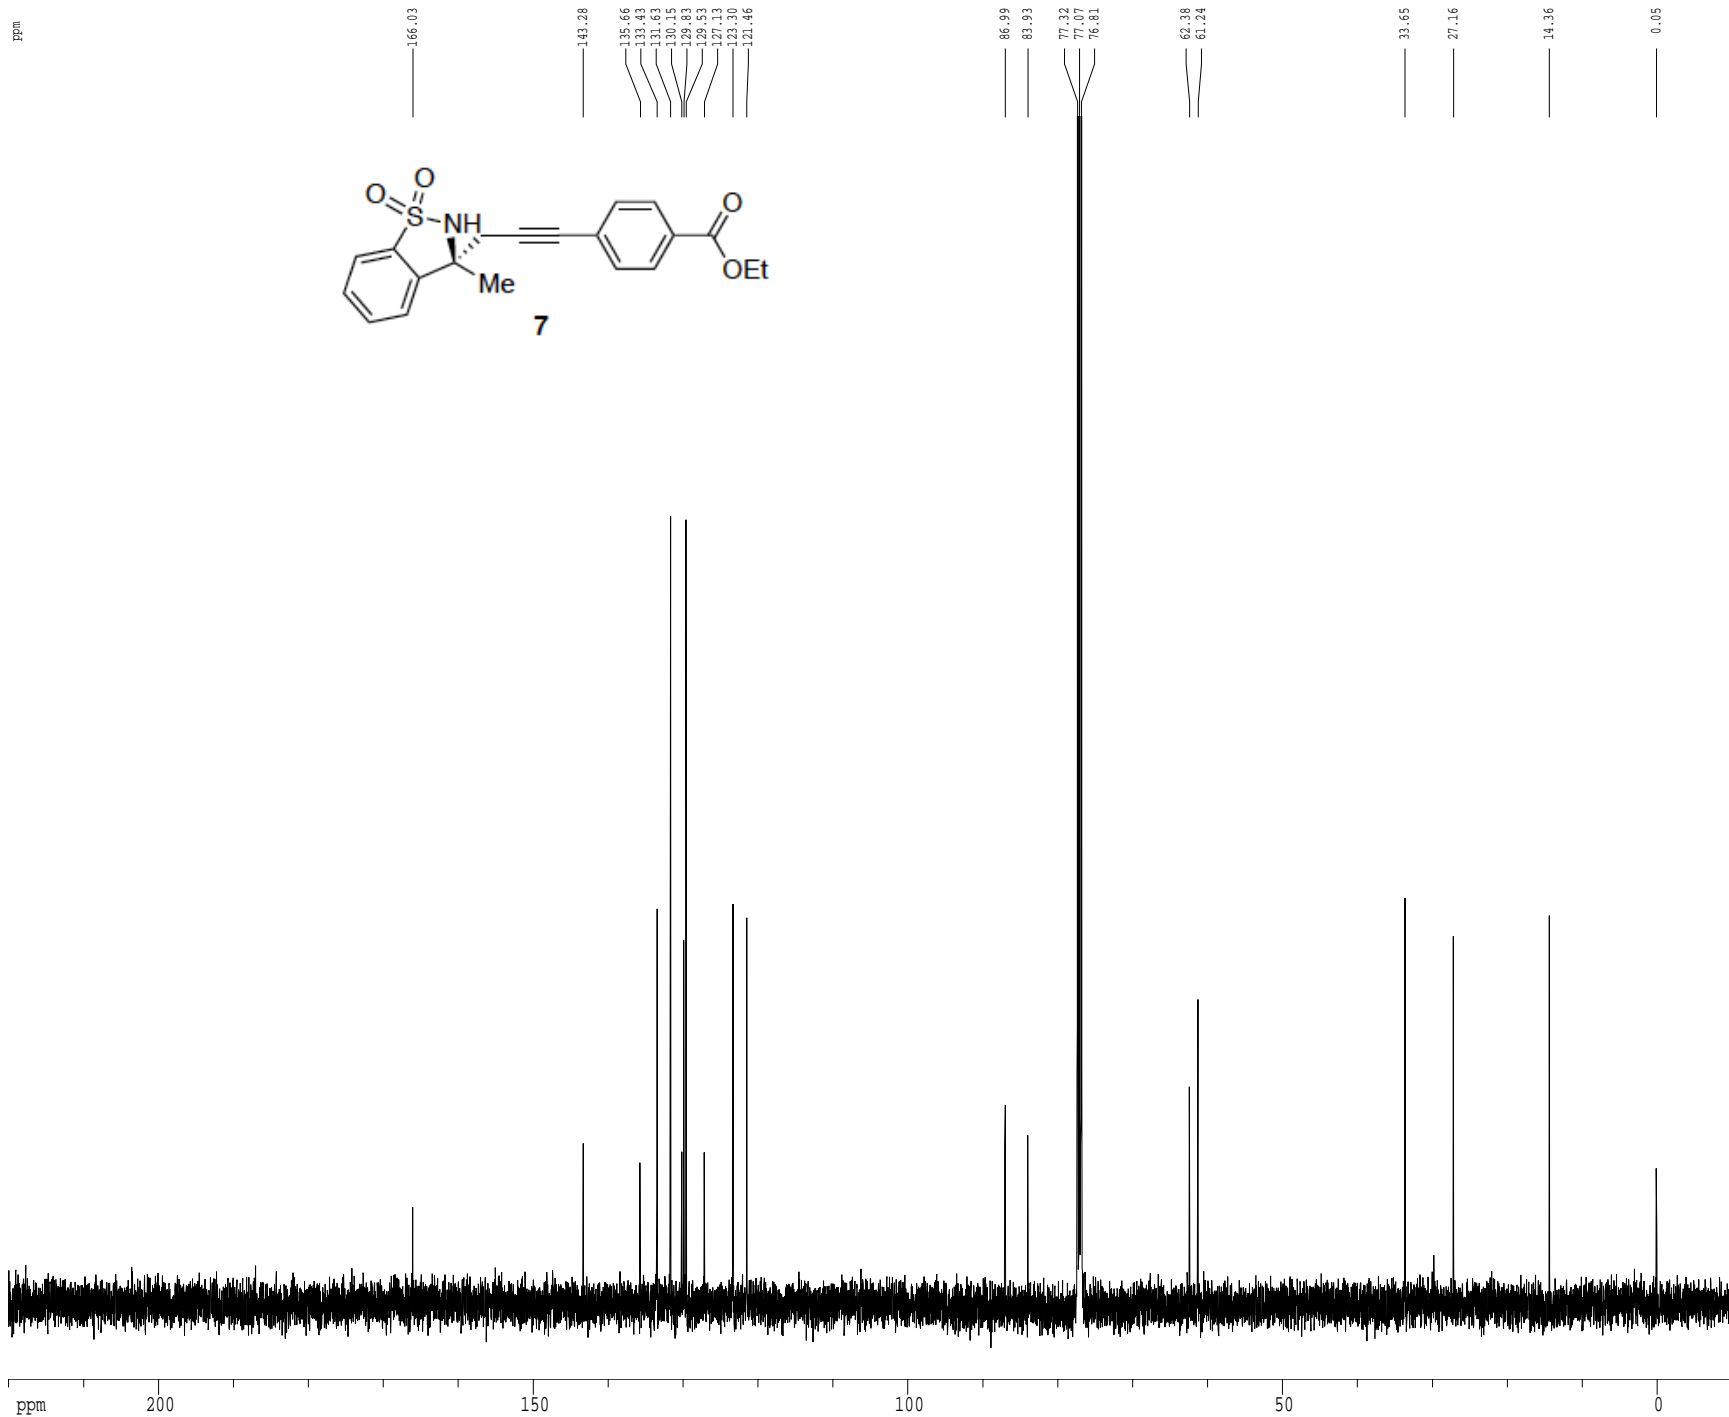

```

Current Data Parameters
Date_ 20150809
Time 16.17
INSTRUM cryo500
PROBHD 5 mm CPXI 1H-
PULPROG SpinEcho30p.prd
TD 65536
SOLVENT CDCl3
NS 1074
DS 16
SWH 30303.031 Hz
FIDRES 0.462388 Hz
AQ 1.0813940 sec
RG 5160.6
DW 16.500 usec
DE 6.00 usec
TE 298.0 K
D1 0.25000000 sec
d11 0.03000000 sec
D16 0.00020000 sec
d17 0.00019000 sec
MCREST 0.00000000 sec
MCWERK 0.01500000 sec
P2 33.10 usec

***** CHANNEL f1 *****
NUC1 13C
P1 16.55 usec
P11 500.00 usec
P12 2000.00 usec
PL0 120.00 dB
PL1 -1.00 dB
SFO1 125.784190 MHz
SF1 2.70 dB
SF2 2.70 dB
SFRAM1 Crp60.0.5.20.1
SFRAM2 Crp60comp.4
SPOFF1 0.00 Hz
SPOFF2 0.00 Hz

***** CHANNEL f2 *****
CPDPRG2 waltz16
NUC2 1H
PCPD2 100.00 usec
PL2 1.60 dB
PL12 24.50 dB
SFO2 500.2225011 MHz

***** GRADIENT CHANNEL *****
GRNAM1 SINE.100
GRNAM2 SINE.100
GPX1 0.00 %
GPX2 0.00 %
GPY1 0.00 %
GPY2 0.00 %
GPZ1 30.00 %
GPZ2 50.00 %
p15 500.00 usec
p16 1000.00 usec

F2 - Processing parameters
SI 65536
SF 125.7804190 MHz
WDW EM
SSB 0
LA 1.00 Hz
GB 0
PC 2.00

1D NMR plot parameters
CX 22.80 cm
CY 75.00 cm
FIP 220.000 ppm
F1 27671.69 Hz
F2P -10.000 ppm
F2 -1257.80 Hz
FRCM 10.08712 ppm/cm
HZCM 1268.83765 Hz/cm
    
```

<sup>1</sup>H spectrum

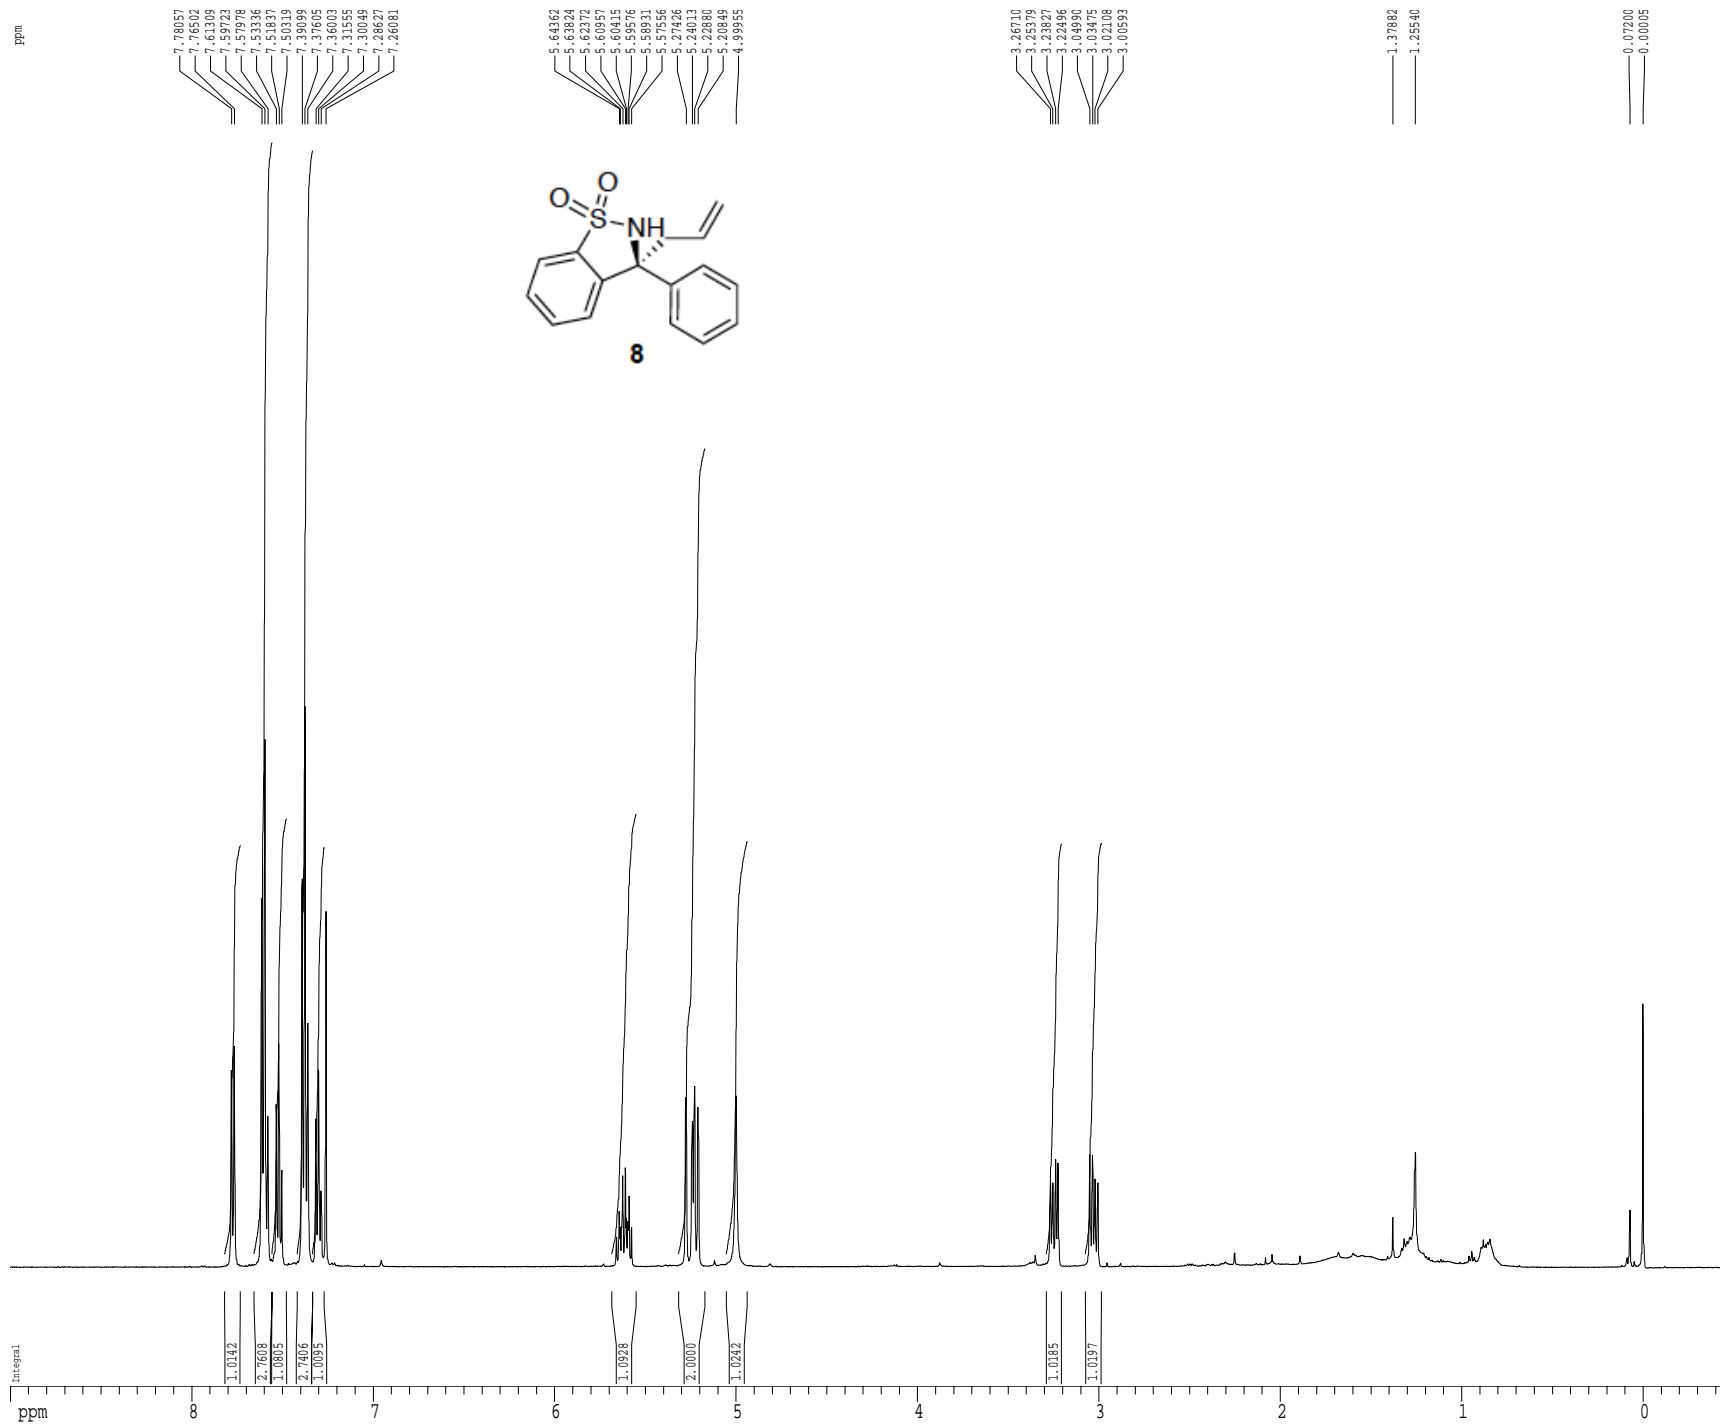

Current Data Parameters  
 USER osborn  
 NAME CAO-III-248C-SI  
 EXPNO 1  
 PROCNO 1

F2 - Acquisition Parameters  
 Date\_ 20150807  
 Time 9.15  
 INSTRUM cryo500  
 PROBHD 5 mm CPTCI 1H-  
 PULPROG zg30  
 TD 81728  
 SOLVENT CDCl3  
 NS 8  
 DS 2  
 SWH 8012.820 Hz  
 FIDRES 0.098043 Hz  
 AQ 5.0998774 sec  
 RG 4  
 DW 62.400 usec  
 DE 6.00 usec  
 TE 298.0 K  
 DL 0.10000000 sec  
 MCREST 0.00000000 sec  
 MCWRR 0.01500000 sec

===== CHANNEL f1 =====  
 NUC1 1H  
 P1 7.50 usec  
 PL1 1.60 dB  
 SF01 500.2235015 MHz

F2 - Processing parameters  
 SI 65536  
 SF 500.2200310 MHz  
 WDW EM  
 SSB 0  
 LB 0.30 Hz  
 GB 0  
 PC 4.00

1D NMR plot parameters  
 CX 22.80 cm  
 CY 7.50 cm  
 F1P 9.000 ppm  
 F1 4501.98 Hz  
 F2P -0.500 ppm  
 F2 -250.11 Hz  
 PPMCM 0.41667 ppm/cm  
 HZCM 208.42502 Hz/cm

Z-restored spin-echo 13C spectrum with 1H decoupling

ppm

143.25  
141.69  
134.81  
133.51  
131.72  
129.60  
128.13  
126.71  
124.21  
124.60  
122.05  
121.60

77.42  
77.16  
76.91

67.73

45.23

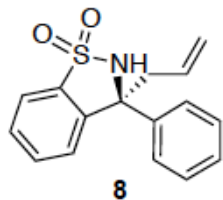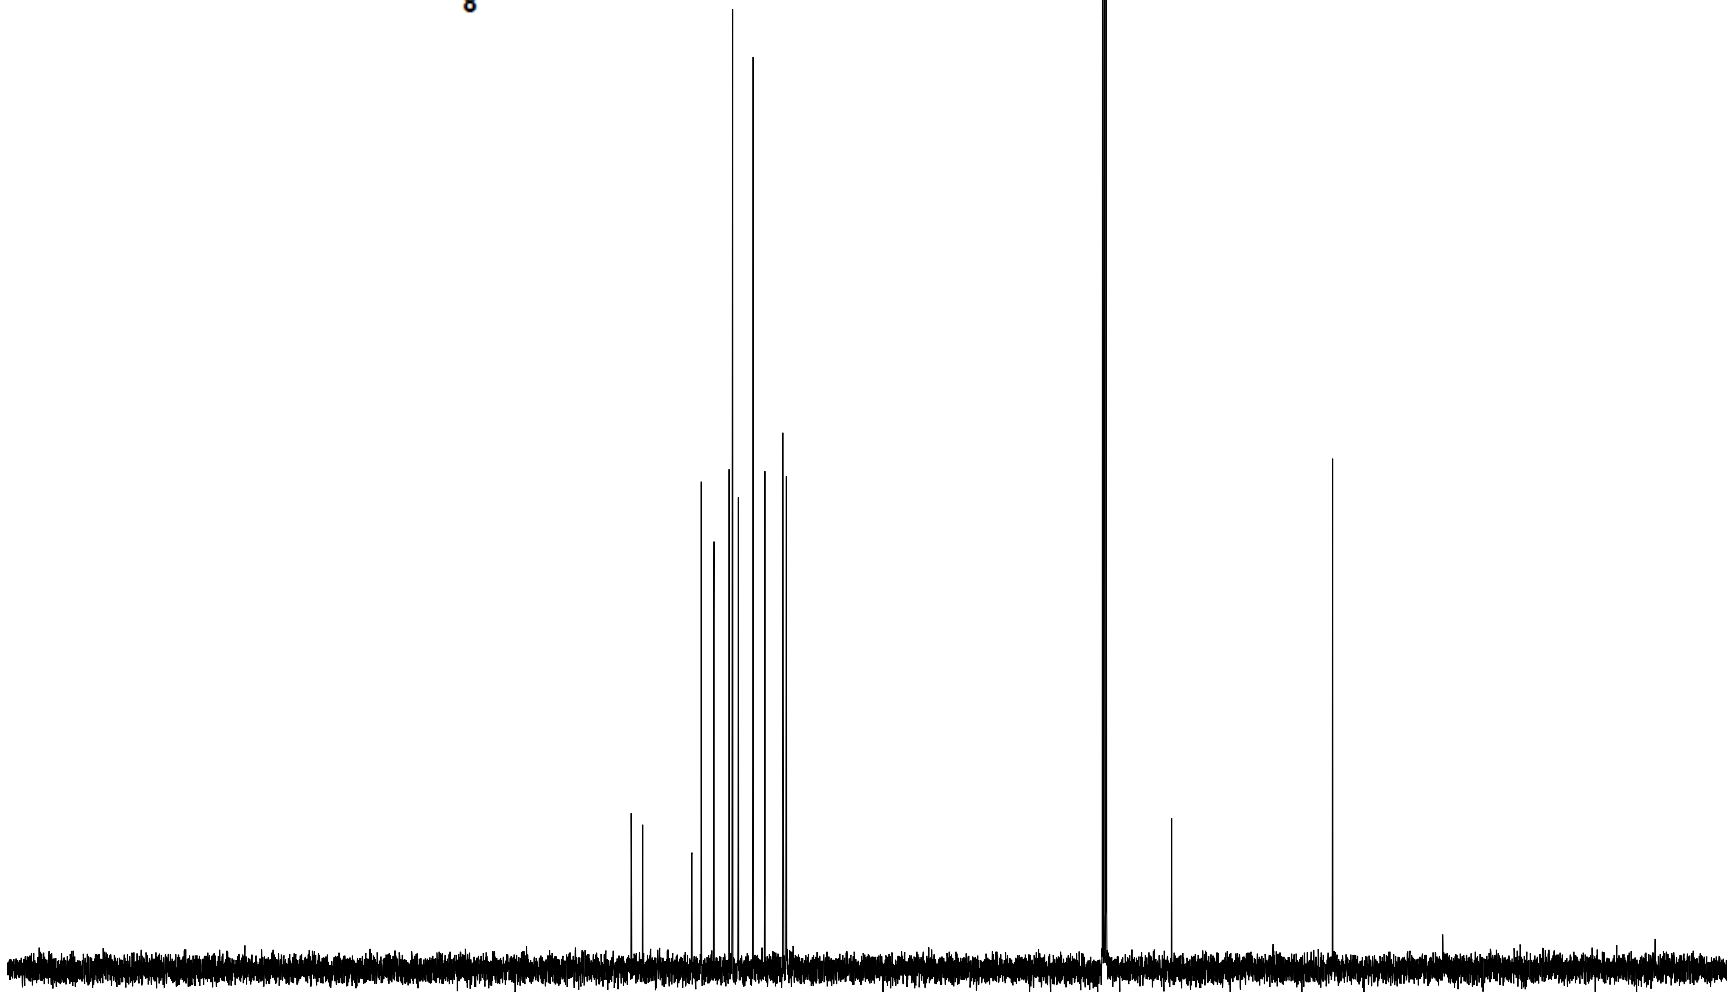

```

Current Data Parameters
USER      osborn
NAME      CAO-III-248C-SI
EXPNO     2
PROCNO    1

F2 - Acquisition Parameters
Date_     20150807
Time      9.16
INSTRUM   cryo500
PROBHD    5 mm CPTCI 1H-
PULPROG   SpinEchopg30gp.prd
TD         65536
SOLVENT   CDCl3
NS         135
DS         16
SWH        30303.031 Hz
FIDRES     0.462388 Hz
AQ         1.0813940 sec
RG         7298.2
DW         16.500 usec
DE         6.00 usec
TE         298.0 K
D1         0.25000000 sec
d11        0.03000000 sec
D16        0.00020000 sec
d17        0.00019600 sec
MCREST     0.00000000 sec
MCONR      0.01500000 sec
P2         33.10 usec

===== CHANNEL f1 =====
NUC1       13C
P1         16.55 usec
P11        500.00 usec
P12        2000.00 usec
PL0        120.00 dB
PL1        -1.00 dB
SFO1       125.7942548 MHz
SF1        2.70 dB
SF2        2.70 dB
SFOFF1     Crp60,0.5,20.1
SFOFF2     Crp60comp,4
SPOFF1     0.00 Hz
SPOFF2     0.00 Hz

===== CHANNEL f2 =====
CPDPRG2    waltz16
NUC2       1H
PCPD2     100.00 usec
PL2        1.60 dB
PL12       24.50 dB
SFO2       500.2225011 MHz

===== GRADIENT CHANNEL =====
GENAM1     SINE.100
GENAM2     SINE.100
GFX1       0.00 %
GFX2       0.00 %
GPY1       0.00 %
GPY2       0.00 %
GPZ1       30.00 %
GPZ2       50.00 %
p15        500.00 usec
p16        1000.00 usec

F2 - Processing parameters
SI         65536
SF         125.7804094 MHz
WDW        EM
SSB        0
LB         1.00 Hz
GB         0
PC         2.00

1D NMR plot parameters
CX         22.80 cm
CY         15.65 cm
F1P        230.637 ppm
F1         29009.68 Hz
F2P        -10.287 ppm
F2         -1293.96 Hz
PFMCM      10.56688 ppm/cm
HZCM       1329.10693 Hz/cm
    
```

ppm 200 150 100 50 0

<sup>1</sup>H spectrum

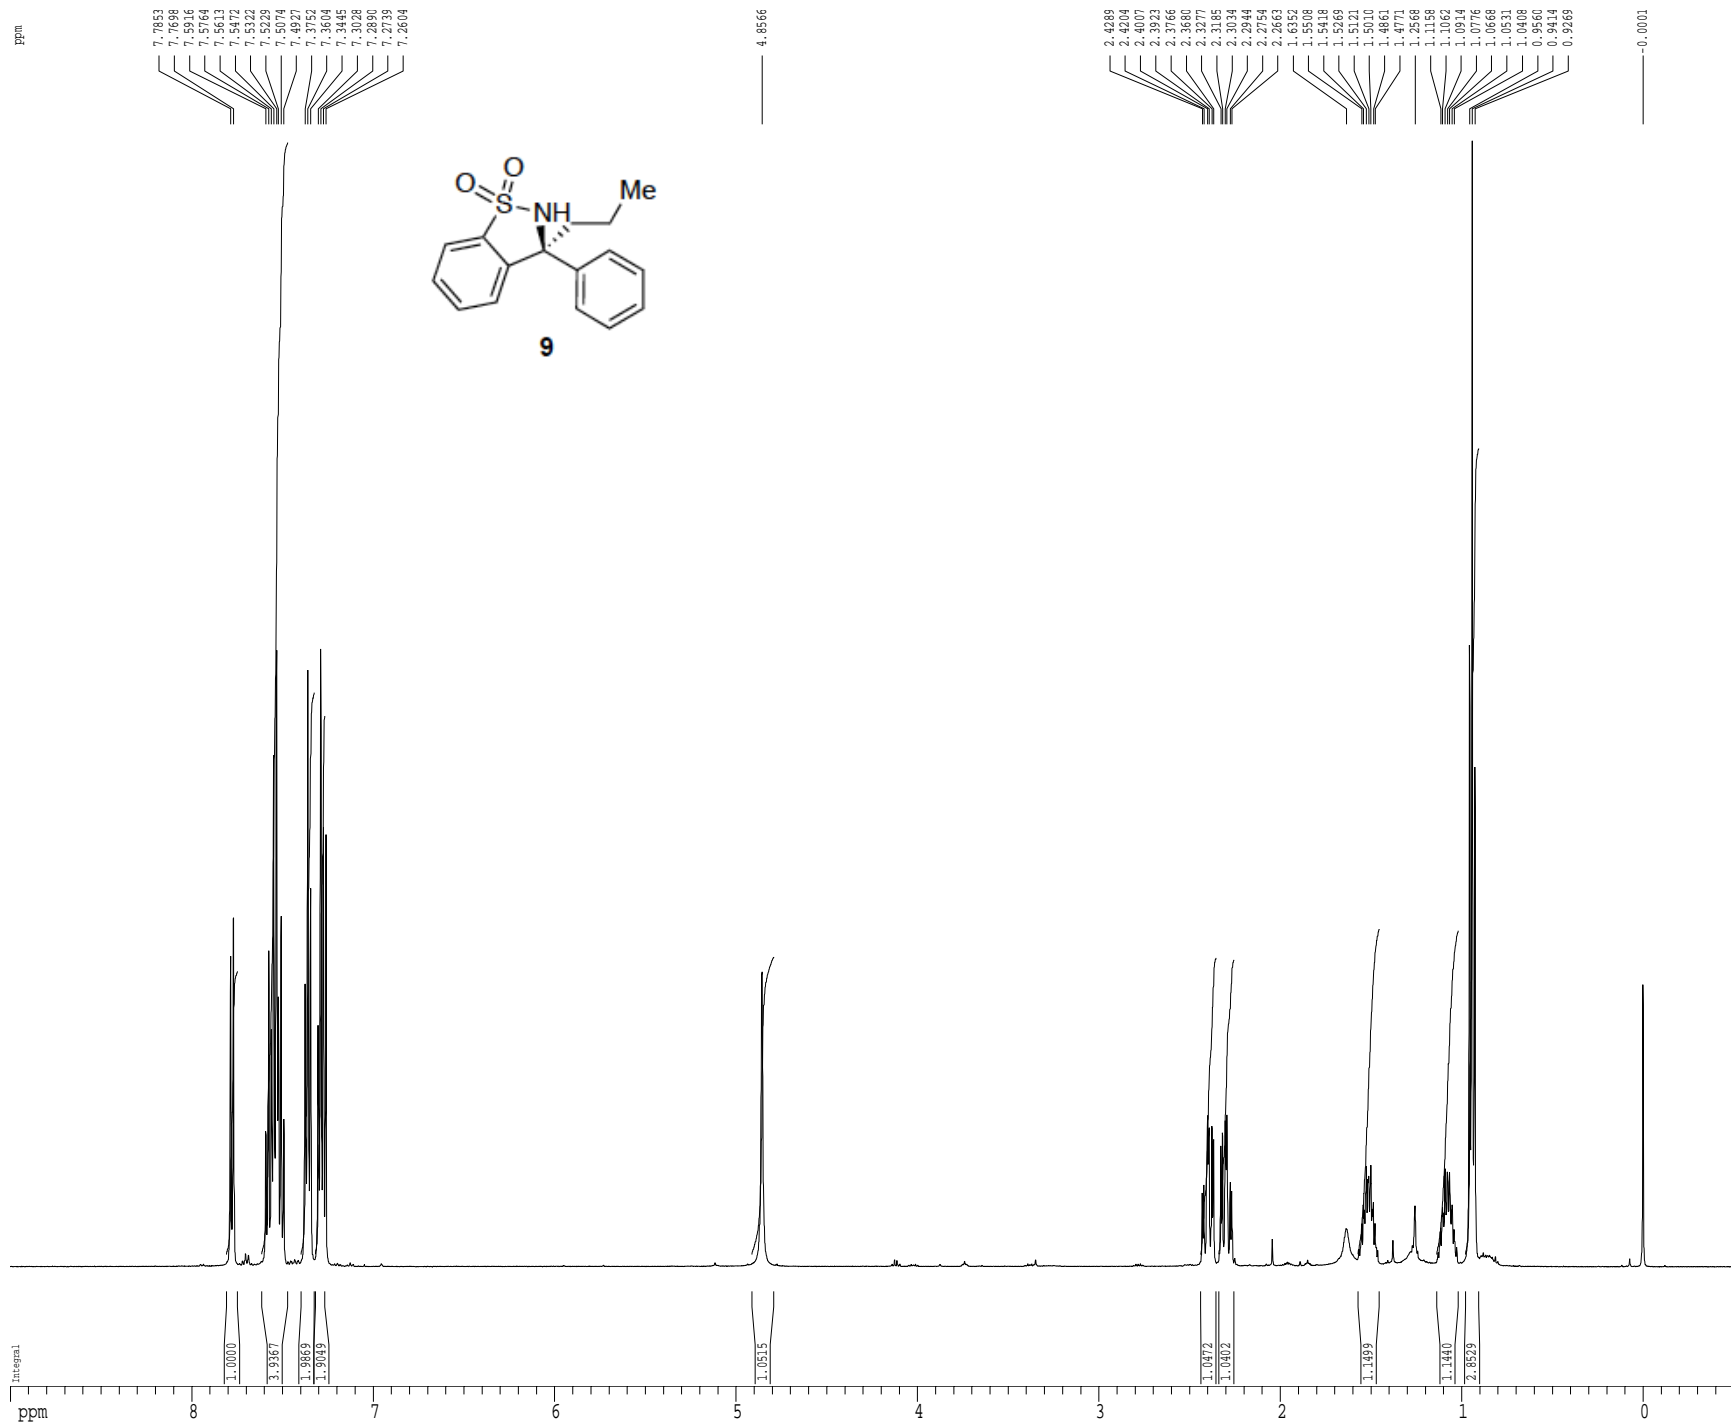

Current Data Parameters  
 USER endean  
 NAME CAO-III-253-SI  
 EXPNO 1  
 PROCNO 1

F2 - Acquisition Parameters  
 Date\_ 20150811  
 Time 17.33  
 INSTRUM cryo500  
 PROBHD 5 mm CPTCI 1H-  
 PULPROG zg30  
 TD 81728  
 SOLVENT CDCl3  
 NS 8  
 DS 2  
 SWH 8012.820 Hz  
 FIDRES 0.098043 Hz  
 AQ 5.0998774 sec  
 RG 6.3  
 DW 62.400 usec  
 DE 6.00 usec  
 TE 298.0 K  
 DL 0.10000000 sec  
 MCREST 0.00000000 sec  
 MCWEX 0.01500000 sec

===== CHANNEL f1 =====  
 NUC1 1H  
 P1 7.50 usec  
 PL1 1.60 dB  
 SF01 500.2235015 MHz

F2 - Processing parameters  
 SI 65536  
 SF 500.2200309 MHz  
 WDW EM  
 SSB 0  
 LB 0.30 Hz  
 GB 0  
 PC 4.00

1D NMR plot parameters  
 CX 22.80 cm  
 CY 15.00 cm  
 F1P 9.000 ppm  
 F1 4501.98 Hz  
 F2P -0.500 ppm  
 F2 -250.11 Hz  
 PPMCM 0.41667 ppm/cm  
 HZCM 208.42502 Hz/cm

Z-restored spin-echo 13C spectrum with 1H decoupling

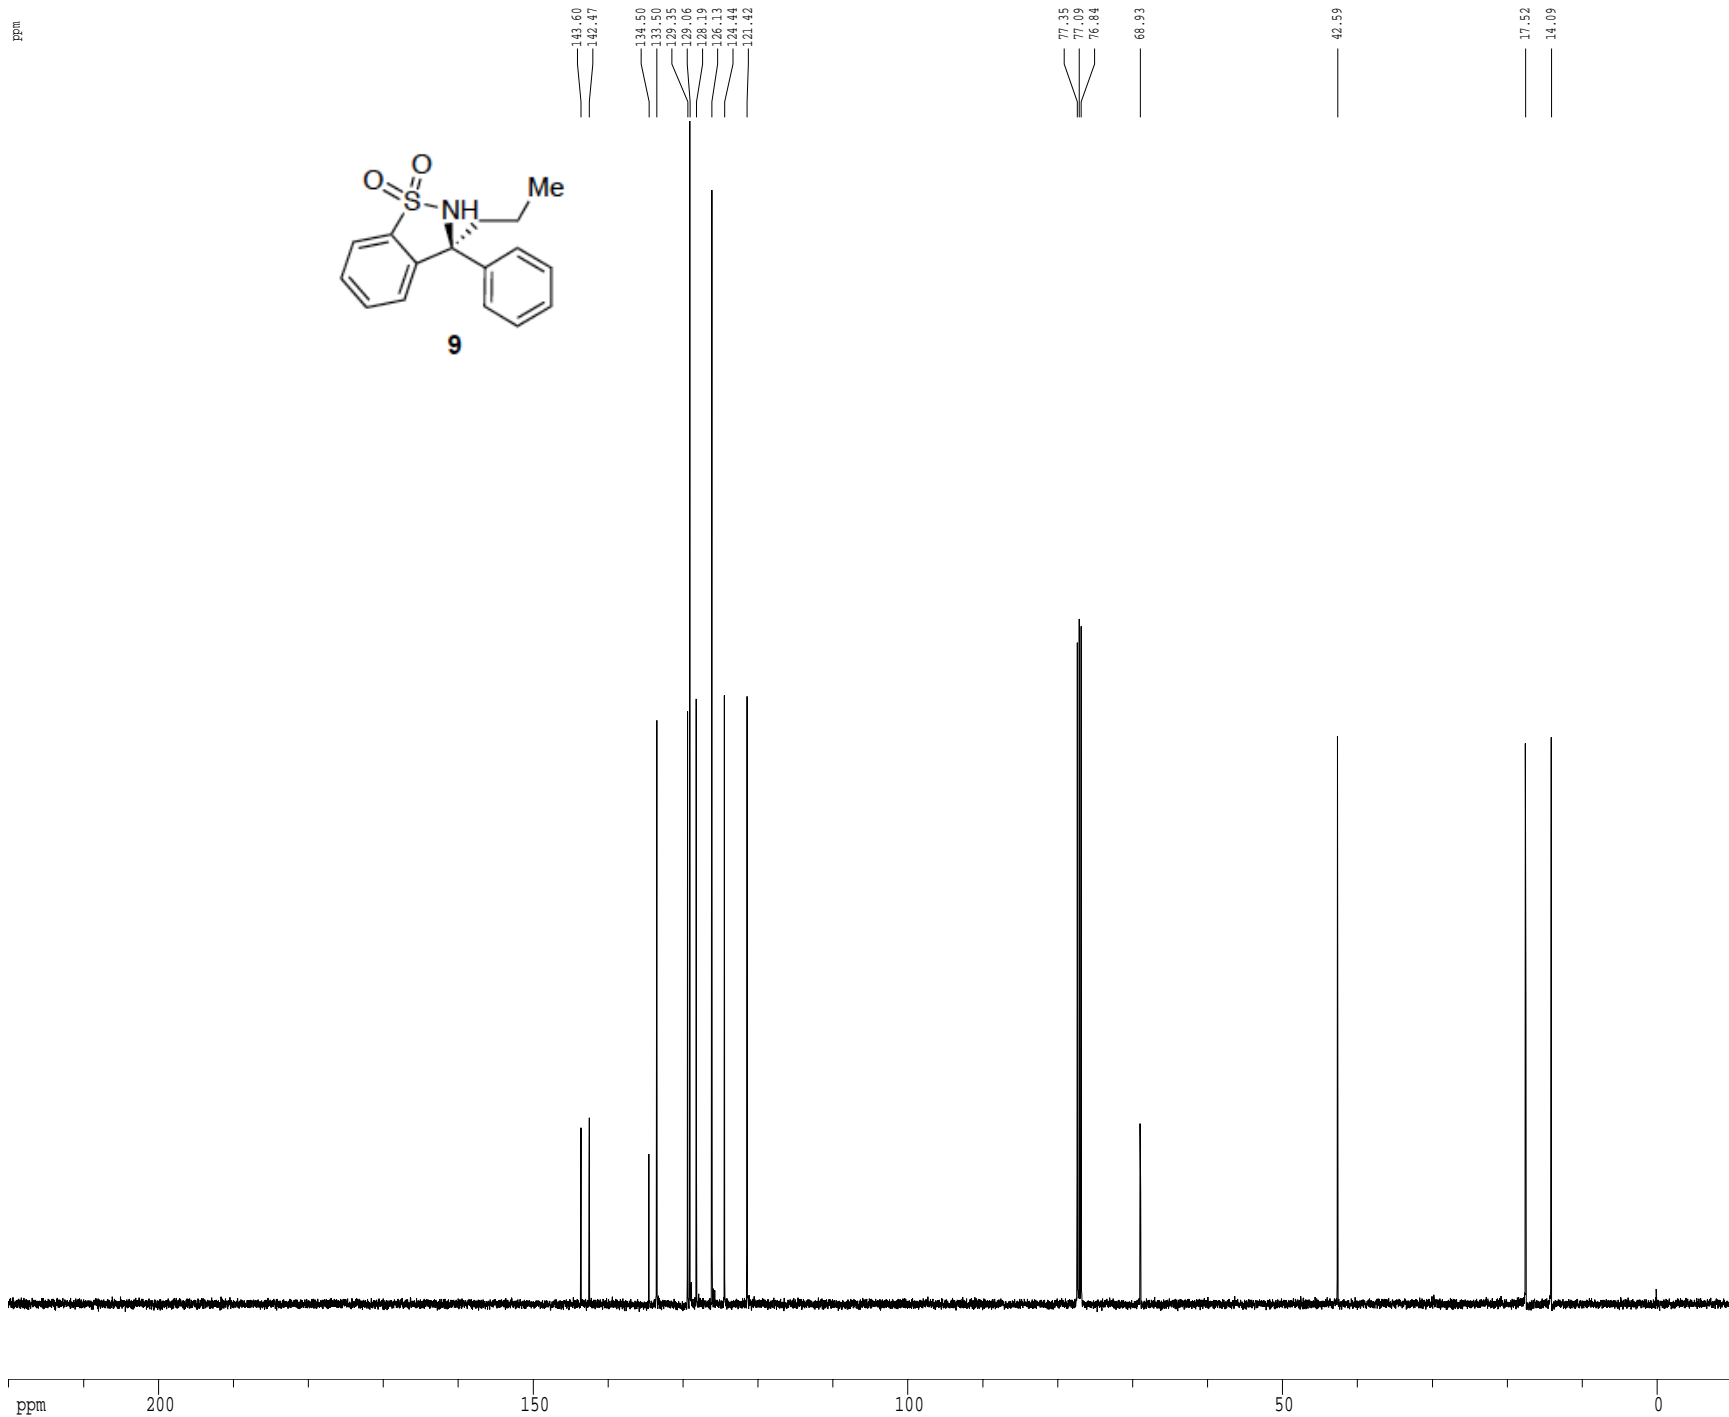

```

Current Data Parameters
USER          endean
NAME          CAO-III-253-SI
EXPNO        2
PROCNO       1

F2 - Acquisition Parameters
Date_        20150811
Time         17.38
INSTRUM      cryo500
PROBHD       5 mm CPTCI 1H-
PULPROG      SpinEchopg30gp.prd
TD           65536
SOLVENT      CDCl3
NS           608
DS           16
SWH          30303.031 Hz
FIDRES       0.462388 Hz
AQ           1.0813940 sec
RG           2896.3
DW           16.500 usec
DE           6.00 usec
TE           298.0 K
D1           0.25000000 sec
d11          0.03000000 sec
D16          0.00020000 sec
d17          0.00019600 sec
MCREST       0.00000000 sec
MCONR       0.01500000 sec
P2           33.10 usec

===== CHANNEL f1 =====
NUC1         13c
P1           16.55 usec
P11          500.00 usec
P12          2000.00 usec
PL0          120.00 dB
PL1          -1.00 dB
SFO1         125.7942548 MHz
SF1          2.70 dB
SF2          2.70 dB
SFO1M1       Crp60,0.5,20.1
SFO1M2       Crp60comp,4
SFOFF1       0.00 Hz
SFOFF2       0.00 Hz

===== CHANNEL f2 =====
CPDPRG2     waltz16
NUC2         1H
PCPD2       100.00 usec
PL2         1.60 dB
PL12        24.50 dB
SFO2        500.2225011 MHz

===== GRADIENT CHANNEL =====
GENAM1      SINE.100
GENAM2      SINE.100
GFX1        0.00 %
GFX2        0.00 %
GPF1        0.00 %
GPF2        0.00 %
GPF3        0.00 %
GPF4        30.00 %
GPF5        50.00 %
p15         500.00 usec
p16         1000.00 usec

F2 - Processing parameters
SI          65536
SF          125.7804190 MHz
WDW         EM
SSB         0
LB          1.00 Hz
GB          0
PC          2.00

ID NMR plot parameters
CX          22.80 cm
CY          15.65 cm
F1P         220.000 ppm
F1          27671.69 Hz
F2P         -10.000 ppm
F2          -1257.80 Hz
PFMCM       10.08772 ppm/cm
HZCM        1268.83765 Hz/cm
    
```

<sup>1</sup>H spectrum

ppm

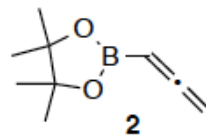

4.8968  
4.71471  
4.69726

1.25877  
1.24310  
1.20904

Integral

ppm

1.000  
2.221

12.515

```

Current Data Parameters
USER          osborn
NAME         CAO-III-162A
EXPNO        3
PROCNO       1

F2 - Acquisition Parameters
Date_        20150205
Time         11.26
INSTRUM      drx400
PROBHD       5 mm QNP H/P/P
PULPROG      zg30
TD           65536
SOLVENT      DMF
NS           8
DS           2
SWH          6410.256 Hz
FIDRES       0.097813 Hz
AQ           5.1118579 sec
RG           32
DW           78.000 usec
DE           4.50 usec
TE           298.0 K
D1           0.10000000 sec
MCREST       0.00000000 sec
MCWRK        0.01500000 sec

===== CHANNEL f1 =====
NUC1          1H
P1           12.00 usec
PL1          0.00 dB
SFO1         400.1328009 MHz

F2 - Processing parameters
SI           65536
SF           400.1300059 MHz
WDW          EM
SSB          0
LB           0.30 Hz
GB           0
PC           2.00

1D NMR plot parameters
CY           22.80 cm
CY           30.00 cm
F1P         9.000 ppm
F1           3601.17 Hz
F2P         -0.500 ppm
F2           -200.06 Hz
PEMCM       0.41667 ppm/cm
HZCM        166.72084 Hz/cm
    
```



<sup>1</sup>H spectrum

ppm

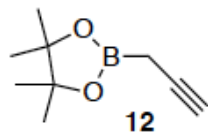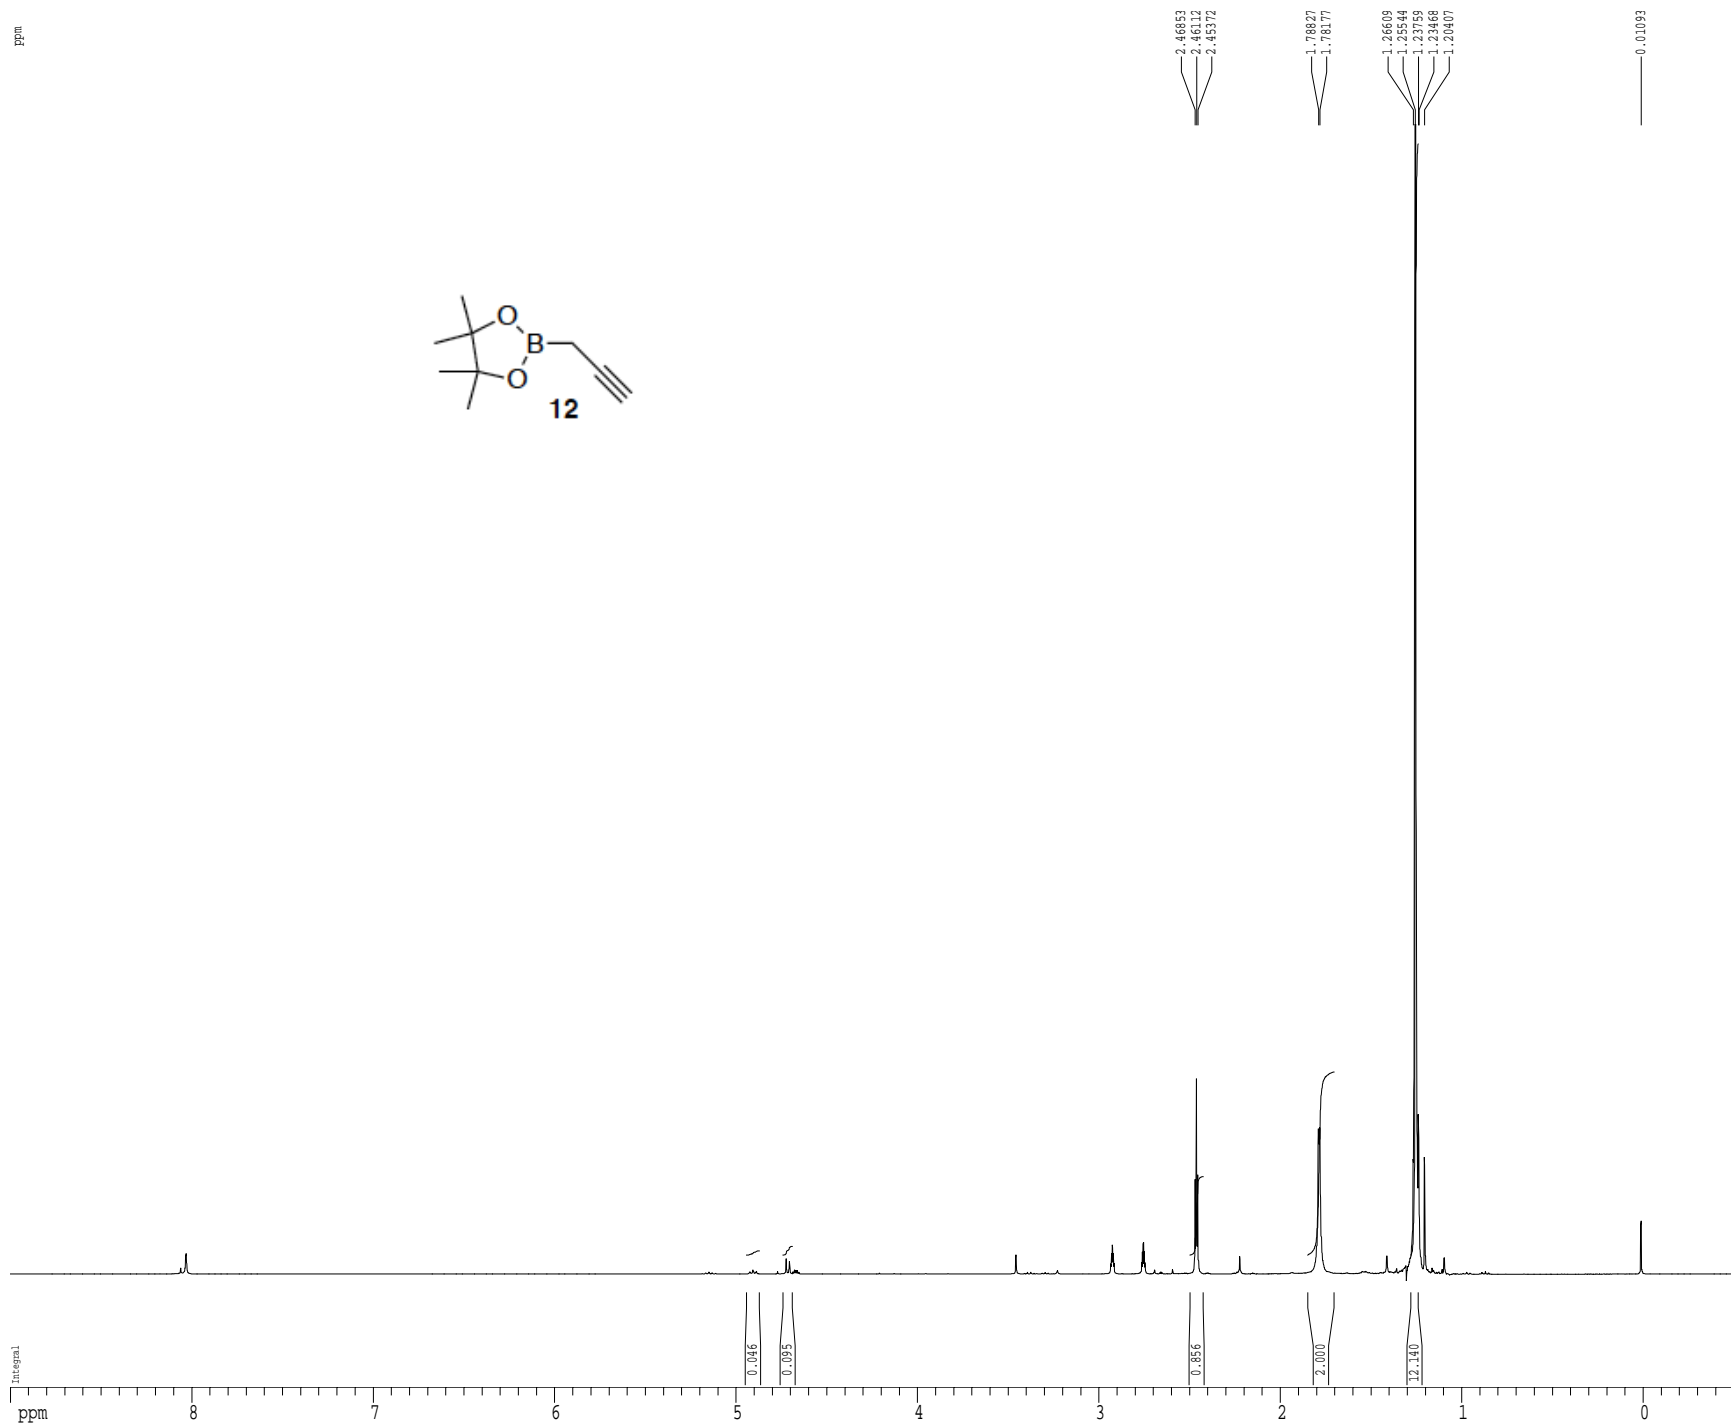

Current Data Parameters  
 USER osborn  
 NAME CAO-III-174-check  
 EXPNO 2  
 PROCNO 1

F2 - Acquisition Parameters  
 Date\_ 20150317  
 Time 12.40  
 INSTRUM dirx400  
 PROBHD 5 mm QNP H/F/P  
 PULPROG zg30  
 TD 65536  
 SOLVENT DMF  
 NS 8  
 DS 2  
 SWH 6410.256 Hz  
 FIDRES 0.097813 Hz  
 AQ 5.1118579 sec  
 RG 90.5  
 DW 78.000 usec  
 DE 4.50 usec  
 TE 298.0 K  
 D1 0.1000000 sec  
 MCREST 0.0000000 sec  
 MCWPK 0.0150000 sec

===== CHANNEL f1 =====  
 NUCL 1H  
 P1 12.00 usec  
 PL1 0.00 dB  
 SF01 400.1328009 MHz

F2 - Processing parameters  
 SI 65536  
 SF 400.1300070 MHz  
 WDW EM  
 SSB 0  
 LB 0.30 Hz  
 GB 0  
 PC 2.00

1D NMR plot parameters  
 CX 22.80 cm  
 CY 60.00 cm  
 FIP 9.000 ppm  
 F1 3601.17 Hz  
 F2P -0.500 ppm  
 F2 -200.06 Hz  
 PPMCM 0.41667 ppm/cm  
 HZCM 166.72084 Hz/cm

Z-restored spin-echo 13C spectrum with 1H decoupling

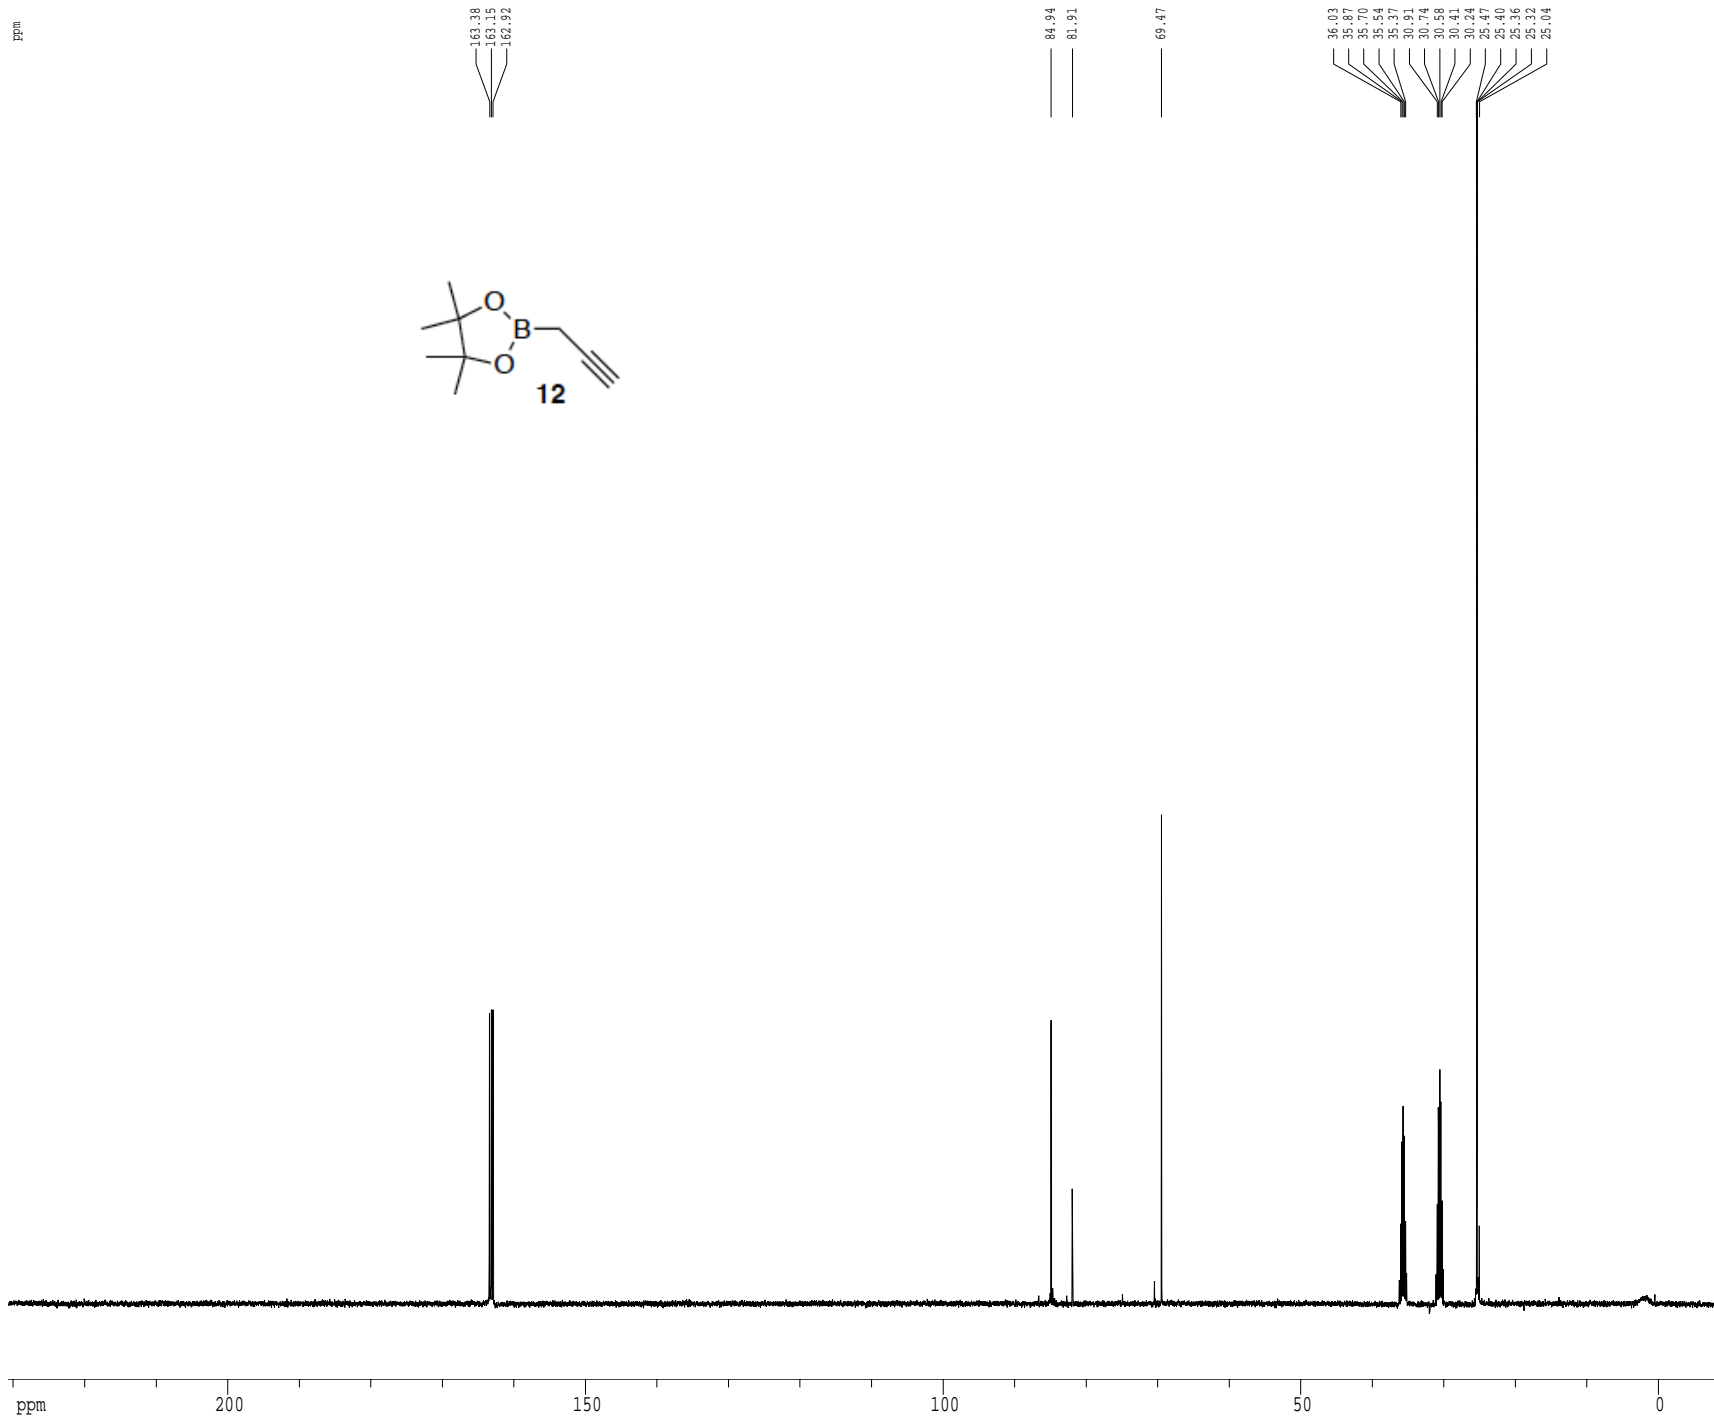

```

Current Data Parameters
USER      osborn
NAME      CAO-III-174-check
EXPNO     4
PROCNO    1

F2 - Acquisition Parameters
Date_     20150318
Time      12.57
INSTRUM   cryo500
PROBHD    5 mm CPTCI 1H-
PULPROG   SpinEchopg30gp.prd
TD         65536
SOLVENT   CDCl3
NS         181
DS         15
SWH        30303.031 Hz
FIDRES     0.462388 Hz
AQ         1.0813940 sec
RG         7298.2
DW         16.500 usec
DE         6.00 usec
TE         298.0 K
D1         0.25000000 sec
d11        0.03000000 sec
D16        0.00020000 sec
d17        0.00019600 sec
MCREST     0.00000000 sec
MCMRXX     0.01500000 sec
P2         33.10 usec

===== CHANNEL f1 =====
NUC1       13c
P1         16.55 usec
P11        500.00 usec
P12        2000.00 usec
PL0        120.00 dB
PL1        -1.00 dB
SFO1       125.7942548 MHz
SF1        2.70 dB
SF2        2.70 dB
SFO1M1     Crp60,0.5,20.1
SFO1M2     Crp60comp,4
SFOFF1     0.00 Hz
SFOFF2     0.00 Hz

===== CHANNEL f2 =====
CPDPRG2    waltz16
NUC2       1H
PCPD2      100.00 usec
PL2        1.60 dB
PL12       24.50 dB
SFO2       500.2225011 MHz

===== GRADIENT CHANNEL =====
GENAM1     SINE.100
GENAM2     SINE.100
GFX1       0.00 %
GFX2       0.00 %
GPF1       0.00 %
GPF2       0.00 %
GPF3       0.00 %
GPF4       30.00 %
GPF5       50.00 %
p15        500.00 usec
p16        1000.00 usec

F2 - Processing parameters
SI         65536
SF         125.7803094 MHz
WDW        EM
SSB        0
LB         1.00 Hz
GB         0
PC         2.00

1D NMR plot parameters
CX         22.80 cm
CY         35.00 cm
F1P        230.637 ppm
F1         29009.65 Hz
F2P        -10.287 ppm
F2         -1293.96 Hz
PFMCM      10.56688 ppm/cm
HZCM       1329.10596 Hz/cm
    
```

<sup>1</sup>H spectrum

ppm

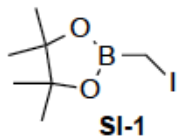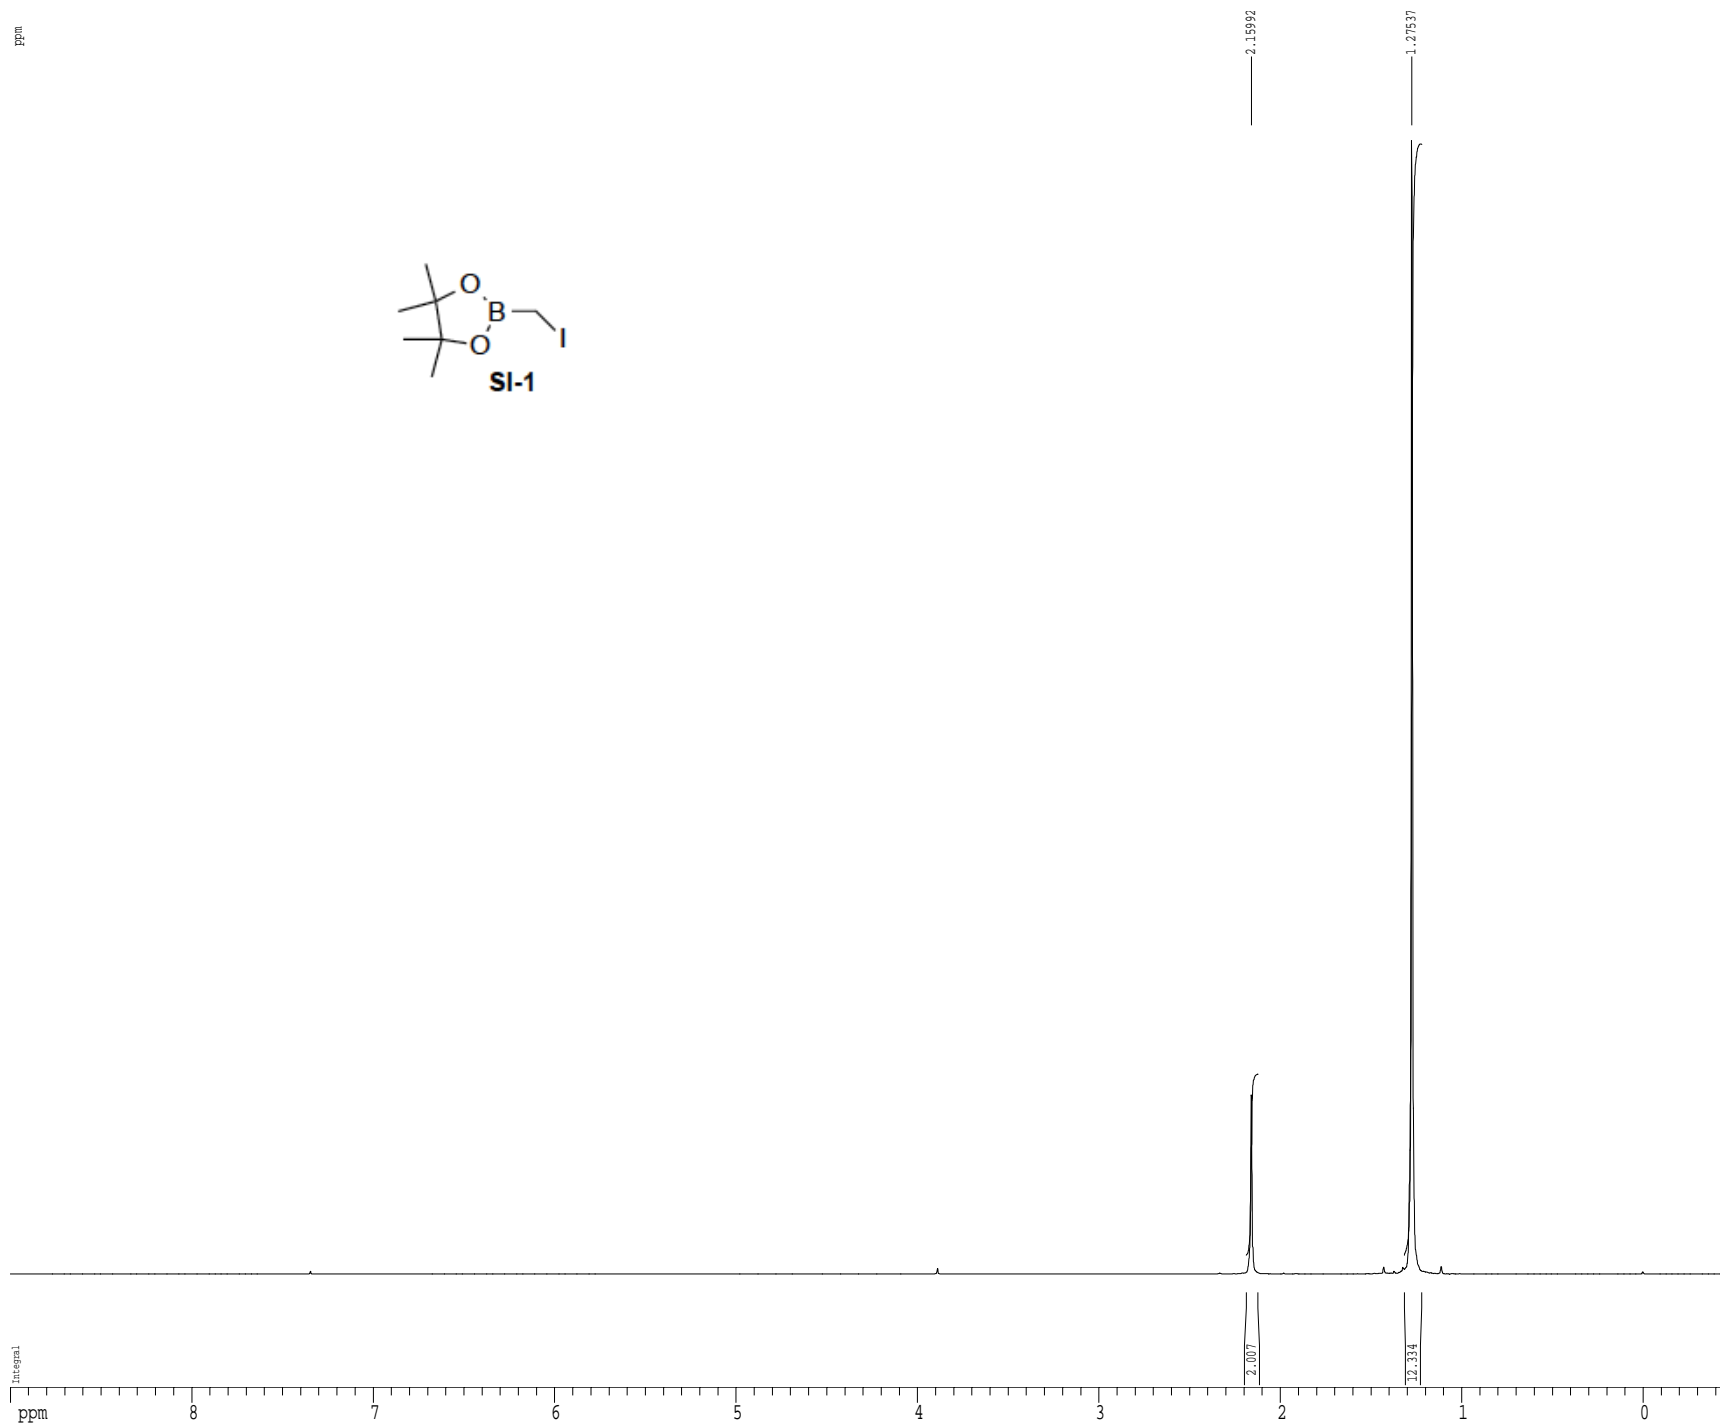

```
Current Data Parameters
USER      osborn
NAME      CAO-I-123 SI
EXPNO     1
PROCNO    1

F2 - Acquisition Parameters
Date_     20121017
Time      9.45
INSTRUM   drx400
PROBHD    5 mm QNP H/P/P
PULPROG   zg30
TD         65536
SOLVENT   CDCl3
NS         8
DS         2
SWH        6410.256 Hz
FIDRES     0.097813 Hz
AQ         5.1118579 sec
RG         16
DW         78.000 usec
DE         4.50 usec
TE         298.0 K
D1         0.10000000 sec
MCREST    0.00000000 sec
MCMRK     0.01500000 sec

===== CHANNEL f1 =====
NUC1      1H
P1        12.00 usec
PL1       -0.60 dB
SFO1      400.1328009 MHz

F2 - Processing parameters
SI         65536
SF         400.1299870 MHz
WDW        EM
SSB        0
LB         0.30 Hz
GB         0
PC         2.00

1D NMR plot parameters
CX         22.80 cm
CY         15.00 cm
F1P        9.000 ppm
F1         3601.17 Hz
F2P        -0.500 ppm
F2         -200.06 Hz
PEMCM      0.41667 ppm/cm
HZCM       166.72083 Hz/cm
```

SI-171

Z-restored spin-echo 13C spectrum with 1H decoupling

ppm

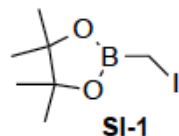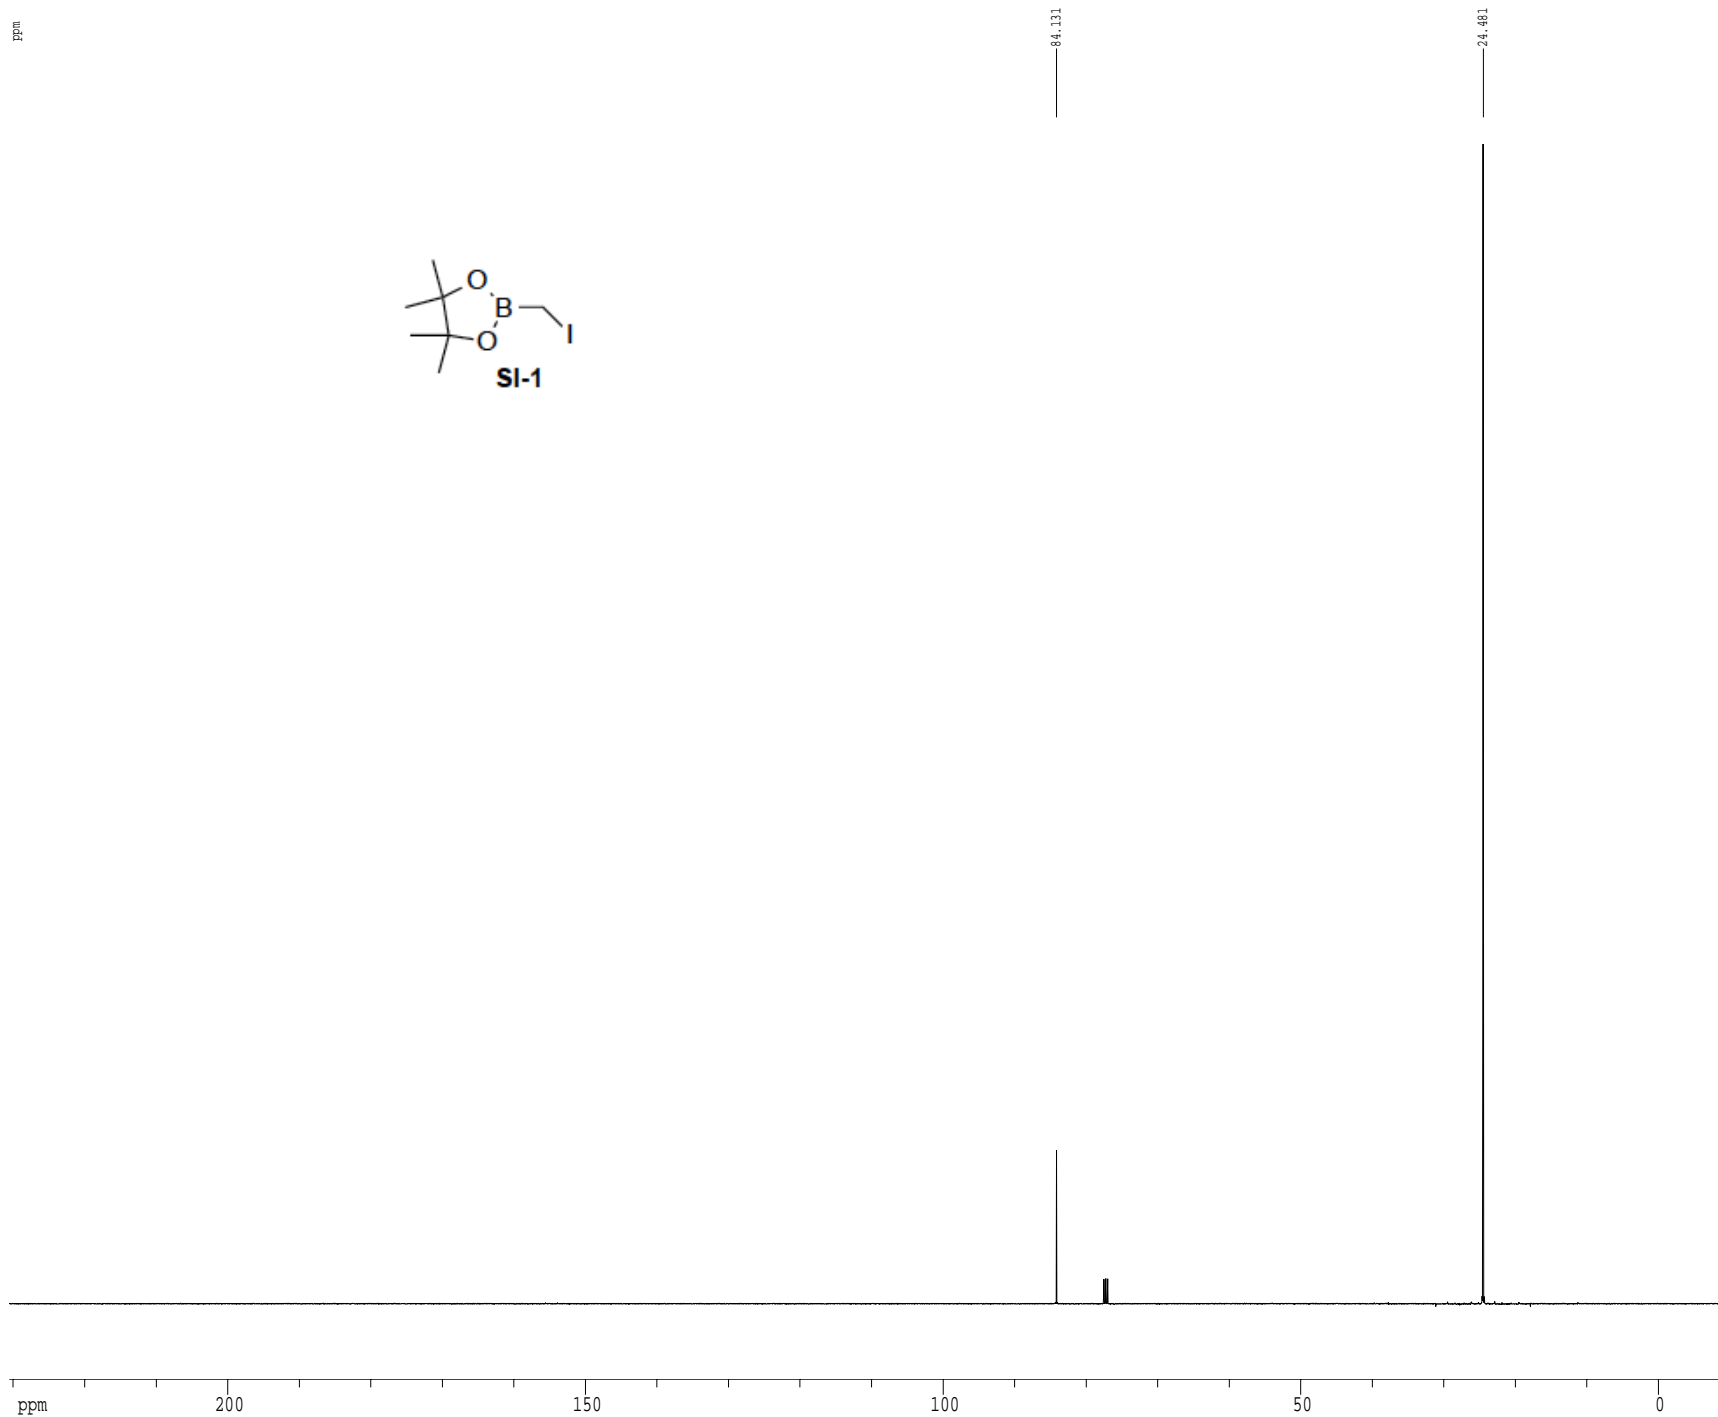

```

Current Data Parameters
USER      osborn
NAME      CAO-1-123 SI
EXPNO     8
PROCNO    1

F2 - Acquisition Parameters
Date_     20121017
Time      19.28
INSTRUM   cryo500
PROBHD    5 mm CPTCI 1H-
PULPROG   SpinEchopg30gp.prd
TD         65536
SOLVENT   CDCl3
NS         66
DS         16
SWH        30303.031 Hz
FIDRES     0.462388 Hz
AQ         1.0813940 sec
RG         7298.2
DW         16.500 usec
DE         6.00 usec
TE         298.0 K
D1         0.25000000 sec
d11        0.03000000 sec
d16        0.00020000 sec
d17        0.00019600 sec
MCREST     0.00000000 sec
MCMRXX     0.01500000 sec
P2         31.00 usec

===== CHANNEL f1 =====
NUC1       13c
P1         15.50 usec
P11        500.00 usec
P12        2000.00 usec
PL0        120.00 dB
PL1        -1.00 dB
SFO1       125.7942548 MHz
SF1        3.20 dB
SFO1M1     Crp60,0.5,20.1
SFO1M2     Crp60comp,4
SFOFF1     0.00 Hz
SFOFF2     0.00 Hz

===== CHANNEL f2 =====
CPDPRG2    waltz16
NUC2        1H
PCPD2      100.00 usec
PL2        1.60 dB
PL12       24.60 dB
SFO2       500.2225011 MHz

===== GRADIENT CHANNEL =====
GENAM1     SINE.100
GENAM2     SINE.100
GFX1       0.00 %
GFX2       0.00 %
GPF1       0.00 %
GPF2       0.00 %
GPF3       0.00 %
GPF4       30.00 %
GPF5       50.00 %
p15        500.00 usec
p16        1000.00 usec

F2 - Processing parameters
SI         65536
SF         125.7804190 MHz
WDW        EM
SSB        0
LB         1.00 Hz
GB         0
PC         2.00

1D NMR plot parameters
CX         22.80 cm
CY         15.65 cm
F1P        230.637 ppm
F1         29009.68 Hz
F2P        -10.287 ppm
F2         -1293.96 Hz
PFMCM      10.56688 ppm/cm
HZCM       1329.10706 Hz/cm
    
```

11B spectrum with 1H decoupling with background suppression

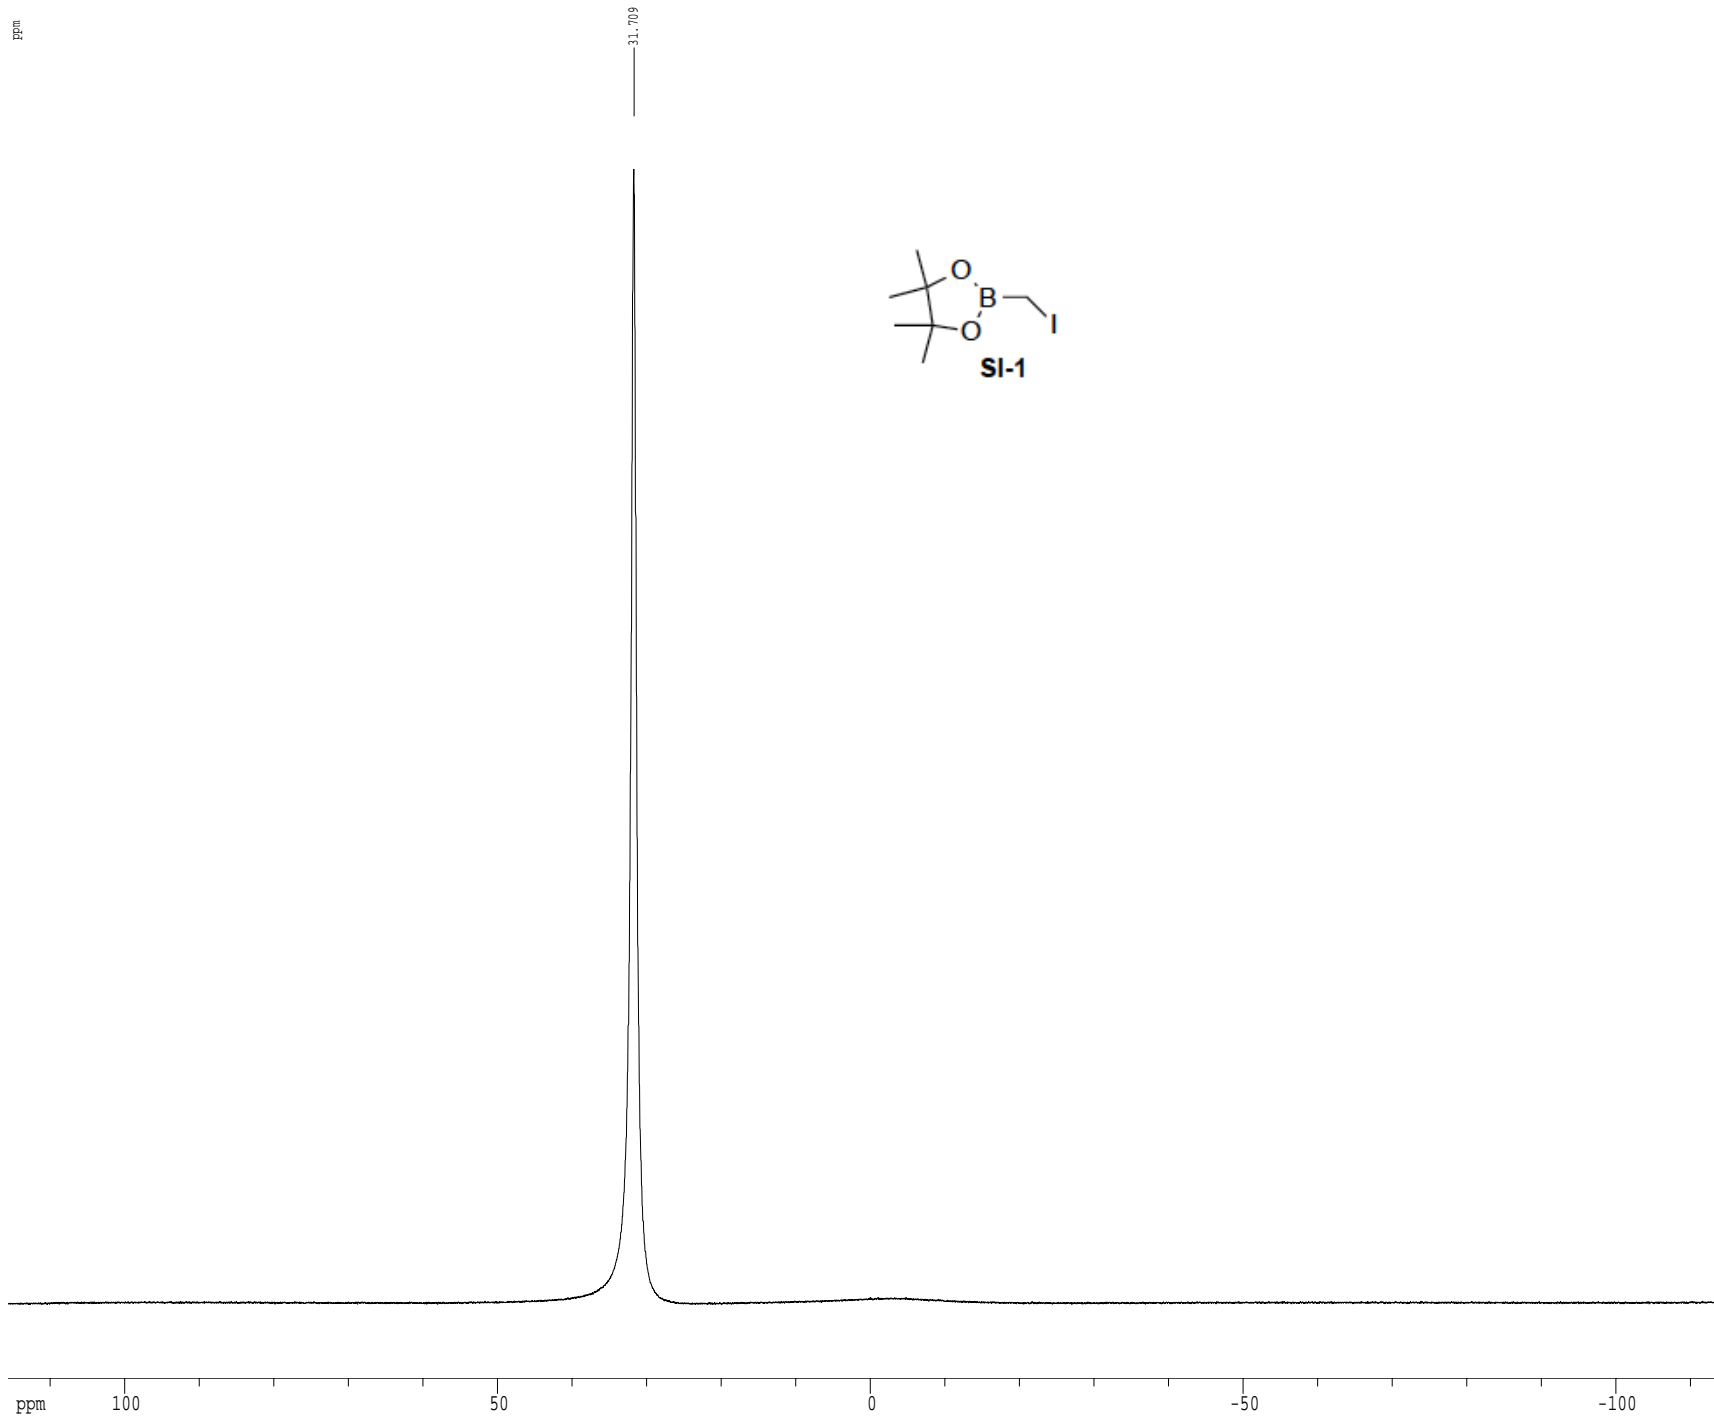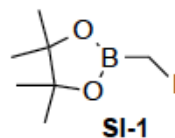

Current Data Parameters  
USER osborn  
NAME CAO-I-123 SI  
EXNO 5  
PROCNO 1

F2 - Acquisition Parameters  
Date\_ 20121017  
Time 10.21  
INSTRUM qn500  
PROBHD 5 mm broadband  
PULPROG zgpg30  
TD 65536  
SOLVENT CDCl3  
NS 64  
DS 4  
SWH 37037.035 Hz  
FIDRES 0.565140 Hz  
AQ 0.8847860 sec  
RG 90.5  
DW 13.500 usec  
DE 6.00 usec  
TE 298.0 K  
D1 1.0000000 sec  
MCREST 0.0000000 sec  
MCWREK 0.0150000 sec

===== CHANNEL f1 =====  
NUC1 11B  
P1 8.65 usec  
p2 17.30 usec  
PL1 -3.00 dB  
SF01 160.2273660 MHz

F2 - Processing parameters  
SI 65536  
SF 160.2273621 MHz  
WDW EM  
SSB 0  
LB 2.00 Hz  
GB 0  
PC 2.00

1D NMR plot parameters  
CX 22.80 cm  
CY 15.00 cm  
F1P 115.601 ppm  
F1 18522.36 Hz  
F2P -115.552 ppm  
F2 -18514.67 Hz  
PPMCM 10.13829 ppm/cm  
HZCM 1624.43140 Hz/cm

CCP2E2A.tmp.DAT - HP1100 DAD Signal A

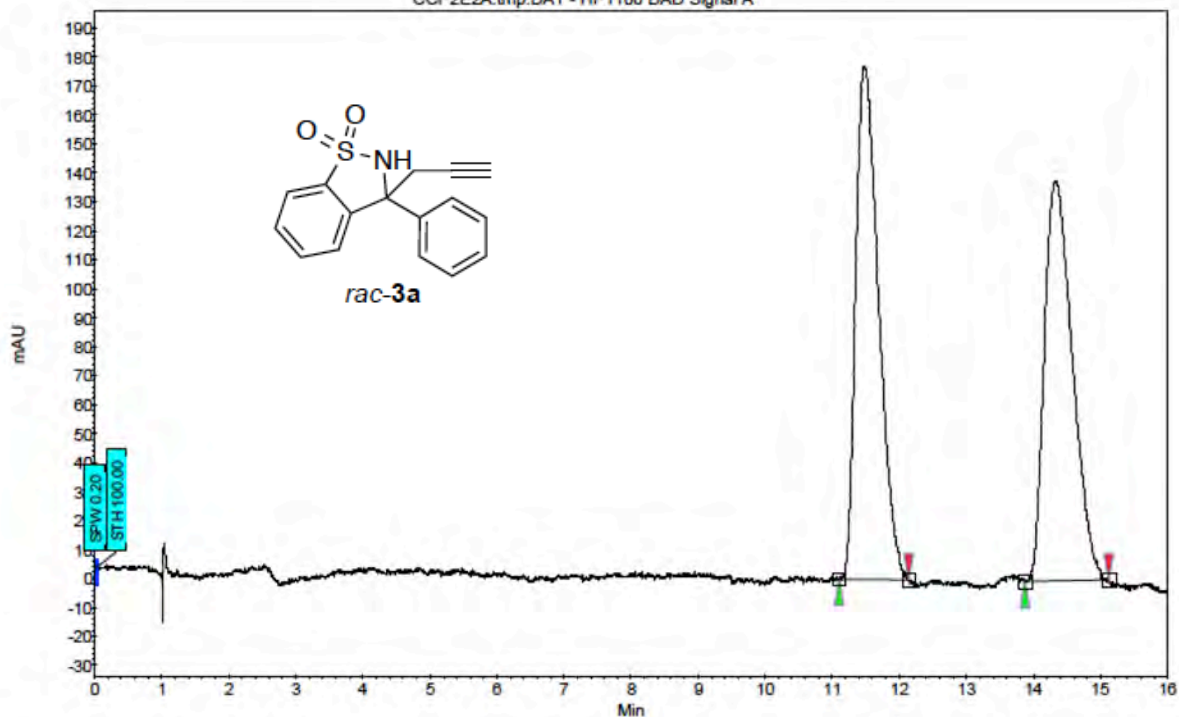

| Index | Name    | Start | Time  | End   | RT Offset | Quantity | Height     | Area           | Area   |
|-------|---------|-------|-------|-------|-----------|----------|------------|----------------|--------|
|       |         | [Min] | [Min] | [Min] | [Min]     | [% Area] | [ $\mu$ V] | [ $\mu$ V.Min] | [%]    |
| 1     | UNKNOWN | 11.10 | 11.48 | 12.14 | 0.00      | 51.26    | 177.2      | 70.1           | 51.263 |
| 2     | UNKNOWN | 13.87 | 14.33 | 15.12 | 0.00      | 48.74    | 138.2      | 66.6           | 48.737 |

CCP2E2B.tmp.DAT - HP1100 DAD Signal A

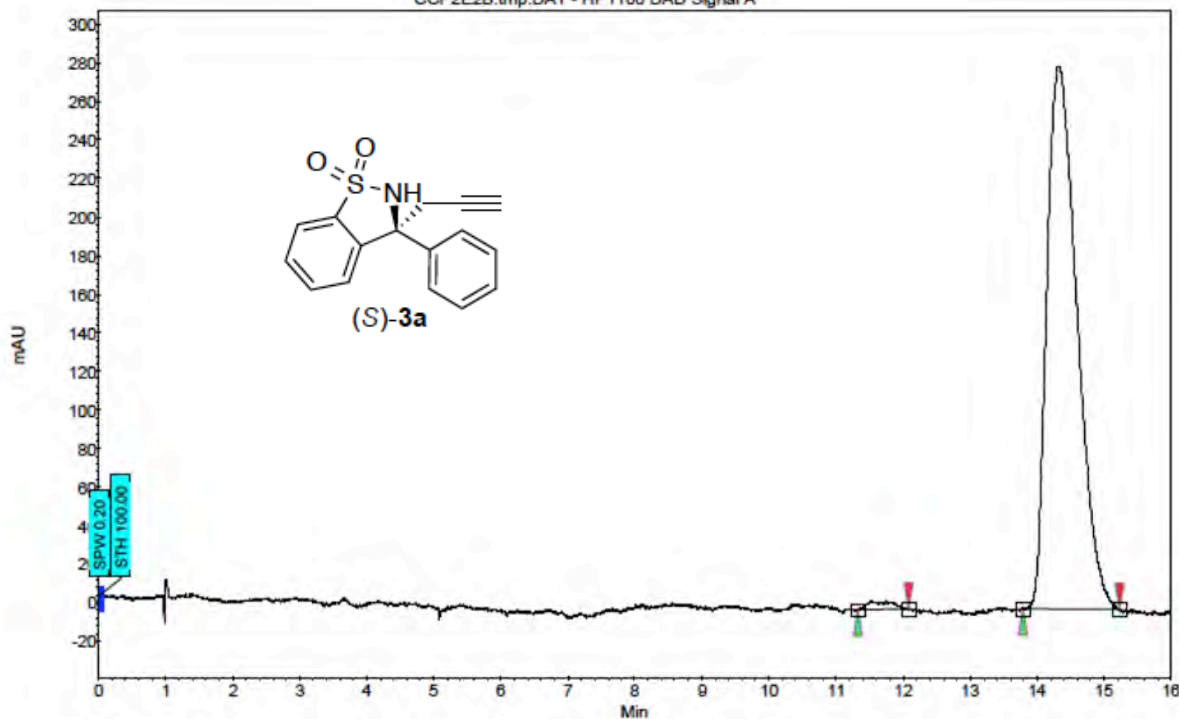

| Index | Name    | Start | Time  | End   | RT Offset | Quantity | Height     | Area           | Area    |
|-------|---------|-------|-------|-------|-----------|----------|------------|----------------|---------|
|       |         | [Min] | [Min] | [Min] | [Min]     | [% Area] | [ $\mu$ V] | [ $\mu$ V.Min] | [%]     |
| 1     | UNKNOWN | 11.33 | 11.54 | 12.08 | 0.00      | 1.19     | 4.6        | 1.8            | 1.190   |
| 2     | UNKNOWN | 13.79 | 14.32 | 15.23 | 0.00      | 98.81    | 281.6      | 146.1          | 98.810  |
| Total |         |       |       |       |           | 100.00   | 286.2      | 147.9          | 100.000 |

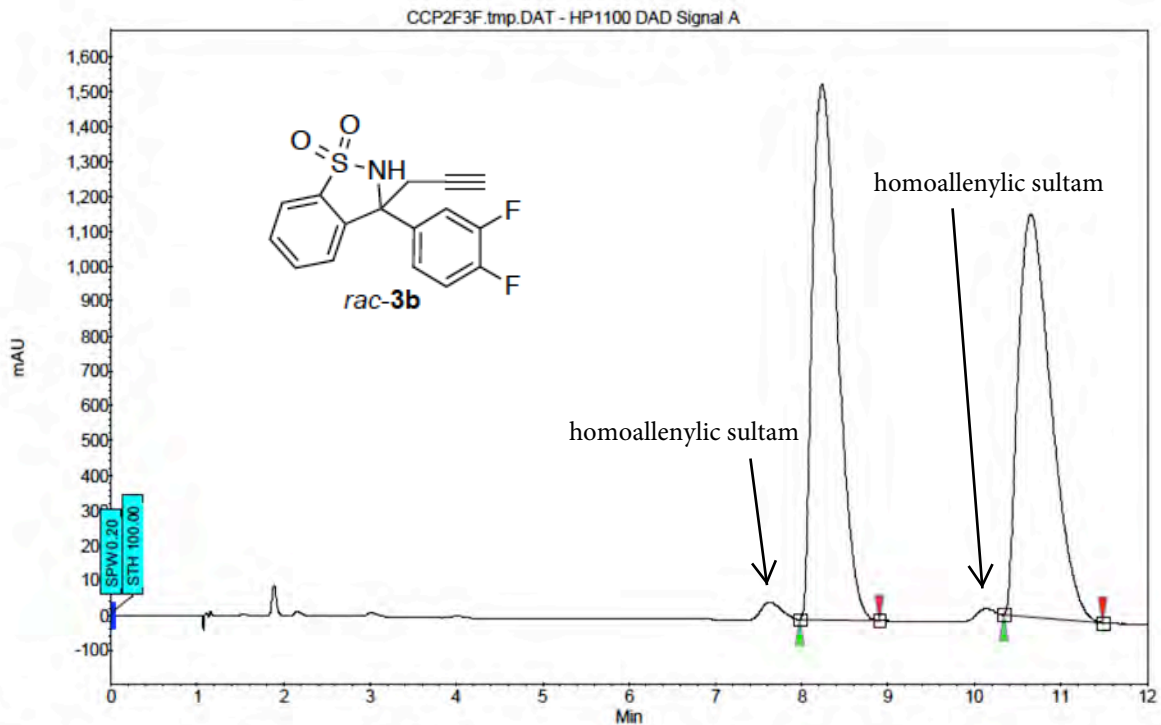

| Index | Name    | Start [Min] | Time [Min] | End [Min] | RT Offset [Min] | Quantity [% Area] | Height [μV] | Area [μV.Min] | Area [%] |
|-------|---------|-------------|------------|-----------|-----------------|-------------------|-------------|---------------|----------|
| 1     | UNKNOWN | 7.97        | 8.24       | 8.90      | 0.00            | 50.40             | 1534.9      | 516.6         | 50.402   |
| 2     | UNKNOWN | 10.34       | 10.65      | 11.48     | 0.00            | 49.60             | 1156.1      | 508.4         | 49.598   |
| Total |         |             |            |           |                 | 100.00            | 2691.0      | 1025.0        | 100.000  |

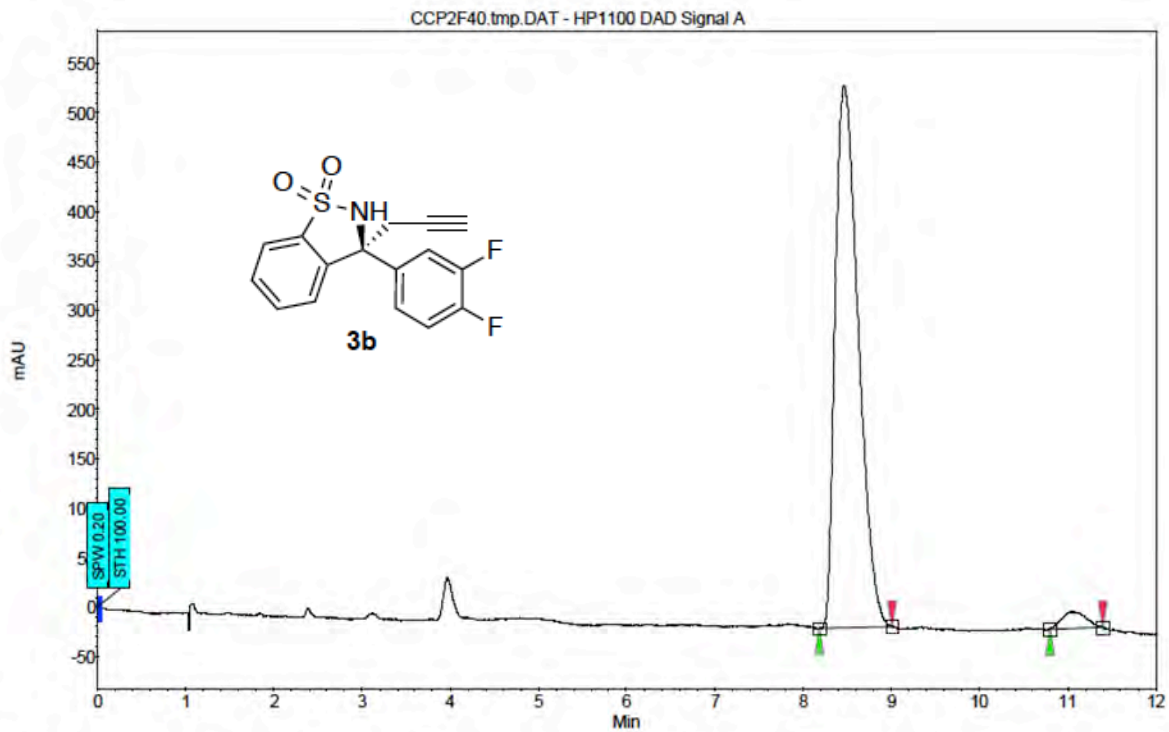

| Index | Name    | Start [Min] | Time [Min] | End [Min] | RT Offset [Min] | Quantity [% Area] | Height [μV] | Area [μV.Min] | Area [%] |
|-------|---------|-------------|------------|-----------|-----------------|-------------------|-------------|---------------|----------|
| 1     | UNKNOWN | 8.18        | 8.47       | 9.01      | 0.00            | 96.84             | 548.7       | 166.2         | 96.840   |
| 2     | UNKNOWN | 10.80       | 11.04      | 11.40     | 0.00            | 3.16              | 17.4        | 5.4           | 3.160    |
| Total |         |             |            |           |                 | 100.00            | 566.0       | 171.6         | 100.000  |

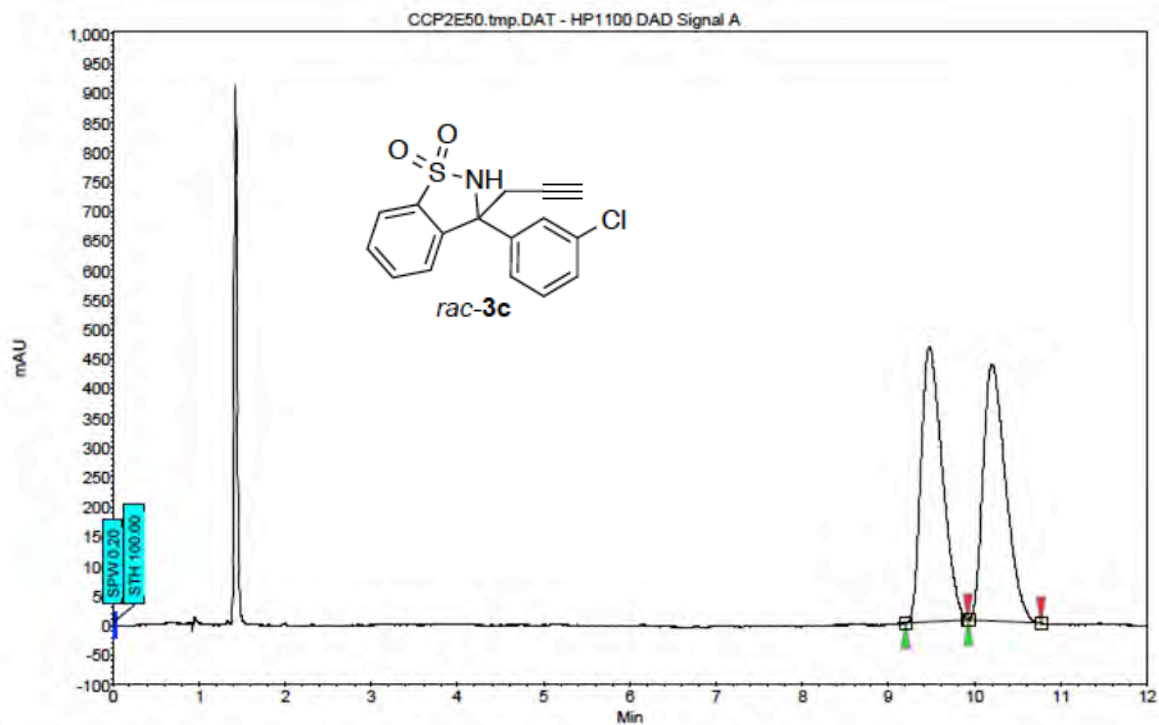

| Index | Name    | Start [Min] | Time [Min] | End [Min] | RT Offset [Min] | Quantity [% Area] | Height [μV] | Area [μV.Min] | Area [%] |
|-------|---------|-------------|------------|-----------|-----------------|-------------------|-------------|---------------|----------|
| 1     | UNKNOWN | 9.19        | 9.47       | 9.91      | 0.00            | 50.06             | 464.5       | 132.2         | 50.064   |
| 2     | UNKNOWN | 9.92        | 10.20      | 10.77     | 0.00            | 49.94             | 434.4       | 131.8         | 49.936   |
| Total |         |             |            |           |                 | 100.00            | 899.0       | 264.0         | 100.000  |

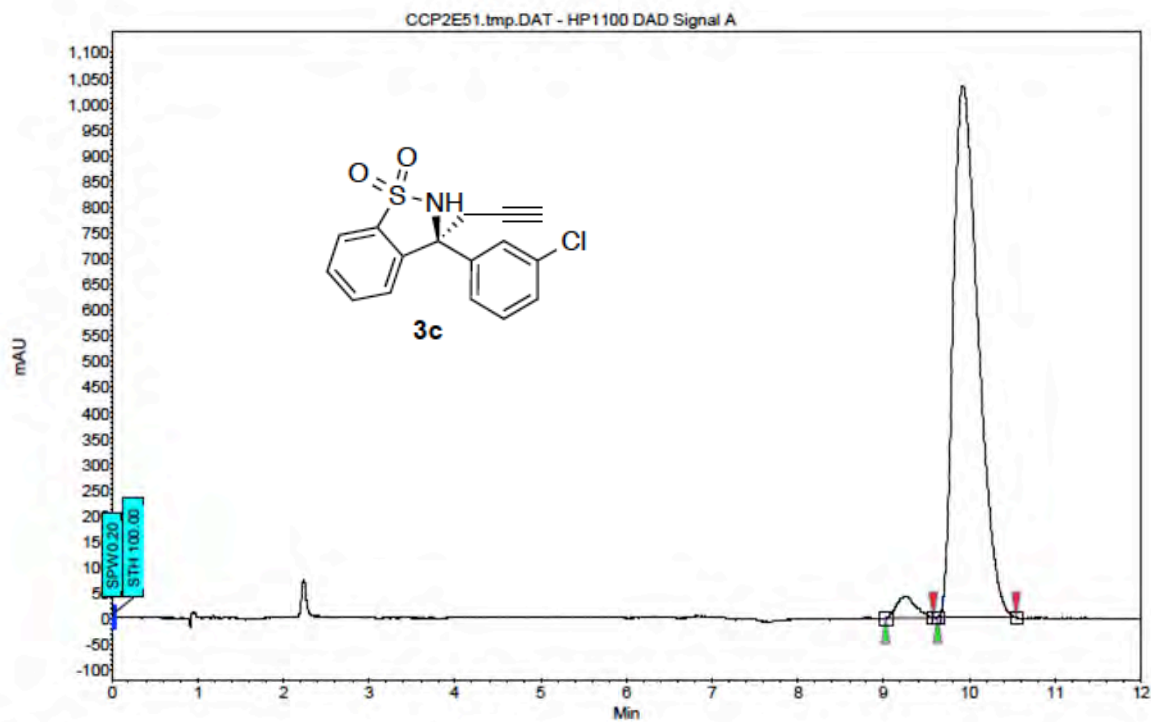

| Index | Name    | Start [Min] | Time [Min] | End [Min] | RT Offset [Min] | Quantity [% Area] | Height [μV] | Area [μV.Min] | Area [%] |
|-------|---------|-------------|------------|-----------|-----------------|-------------------|-------------|---------------|----------|
| 1     | UNKNOWN | 9.02        | 9.24       | 9.58      | 0.00            | 3.02              | 41.6        | 10.8          | 3.022    |
| 2     | UNKNOWN | 9.63        | 9.92       | 10.54     | 0.00            | 96.98             | 1033.9      | 347.8         | 96.978   |
| Total |         |             |            |           |                 | 100.00            | 1075.5      | 358.7         | 100.000  |



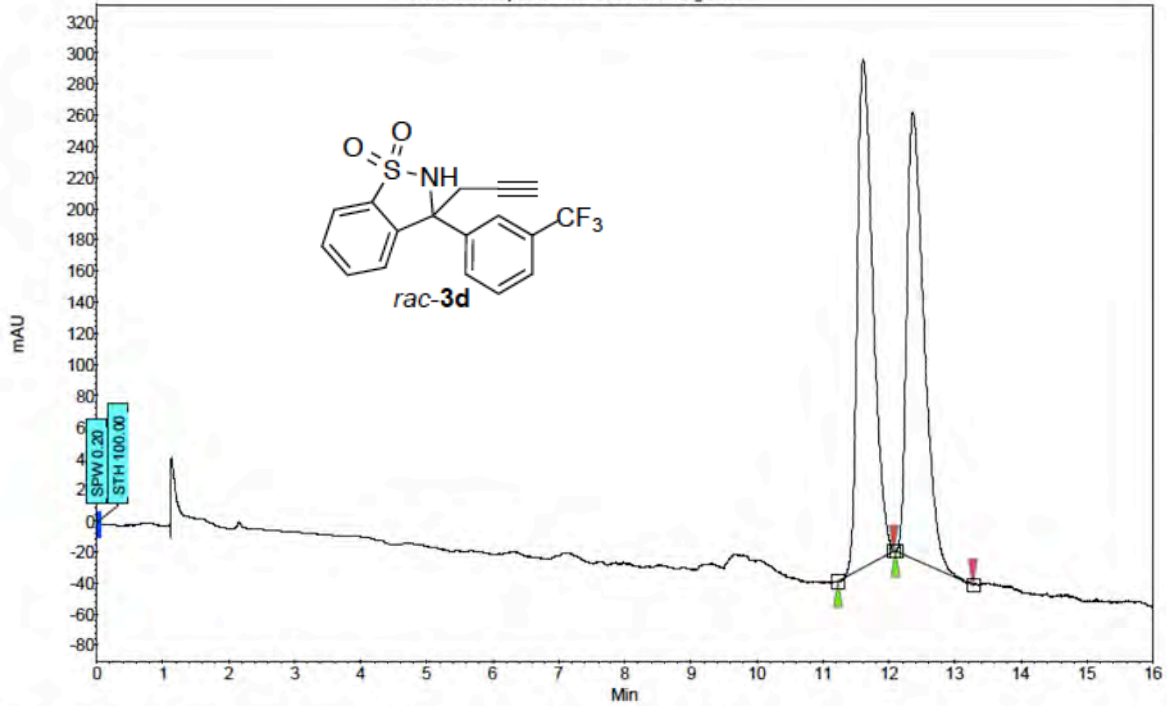

| Index | Name    | Start | Time  | End   | RT Offset | Quantity | Height     | Area           | Area    |
|-------|---------|-------|-------|-------|-----------|----------|------------|----------------|---------|
|       |         | [Min] | [Min] | [Min] | [Min]     | [% Area] | [ $\mu$ V] | [ $\mu$ V.Min] | [%]     |
| 1     | UNKNOWN | 11.23 | 11.61 | 12.07 | 0.00      | 50.60    | 325.9      | 88.7           | 50.596  |
| 2     | UNKNOWN | 12.10 | 12.37 | 13.27 | 0.00      | 49.40    | 286.1      | 86.6           | 49.404  |
| Total |         |       |       |       |           | 100.00   | 612.0      | 175.4          | 100.000 |

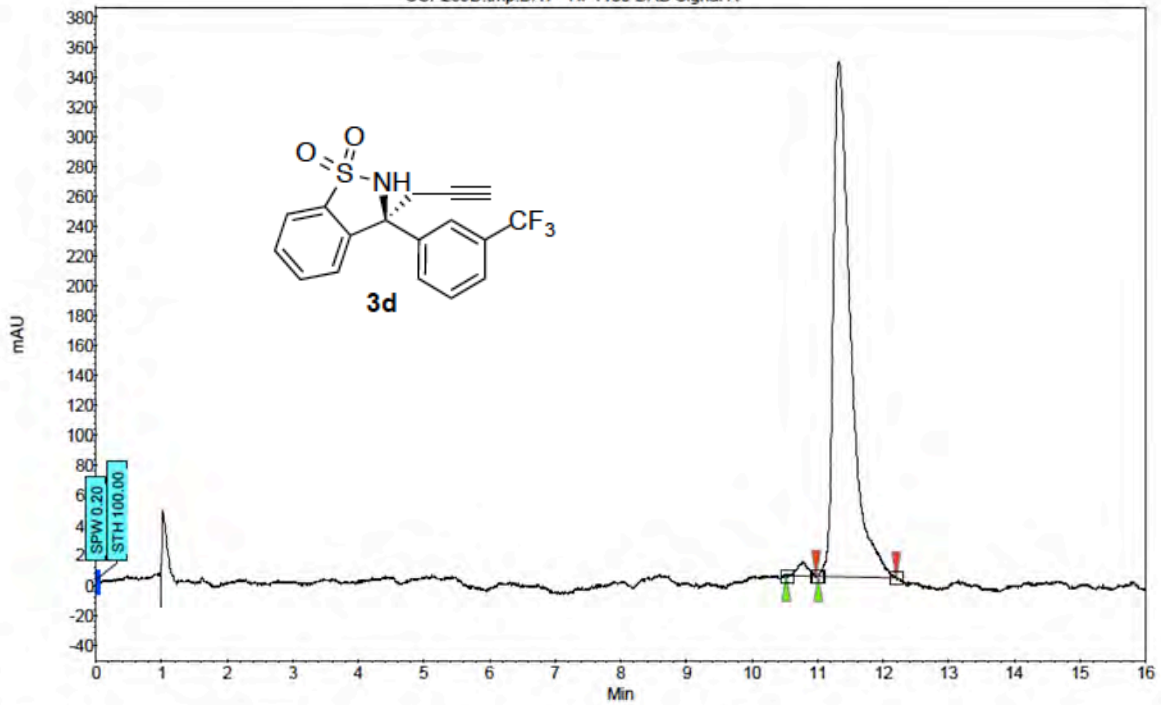

| Index | Name    | Start | Time  | End   | RT Offset | Quantity | Height     | Area           | Area    |
|-------|---------|-------|-------|-------|-----------|----------|------------|----------------|---------|
|       |         | [Min] | [Min] | [Min] | [Min]     | [% Area] | [ $\mu$ V] | [ $\mu$ V.Min] | [%]     |
| 1     | UNKNOWN | 10.53 | 10.77 | 10.98 | 0.00      | 1.61     | 9.2        | 1.7            | 1.611   |
| 2     | UNKNOWN | 11.01 | 11.33 | 12.20 | 0.00      | 98.39    | 344.7      | 105.1          | 98.389  |
| Total |         |       |       |       |           | 100.00   | 353.9      | 106.8          | 100.000 |

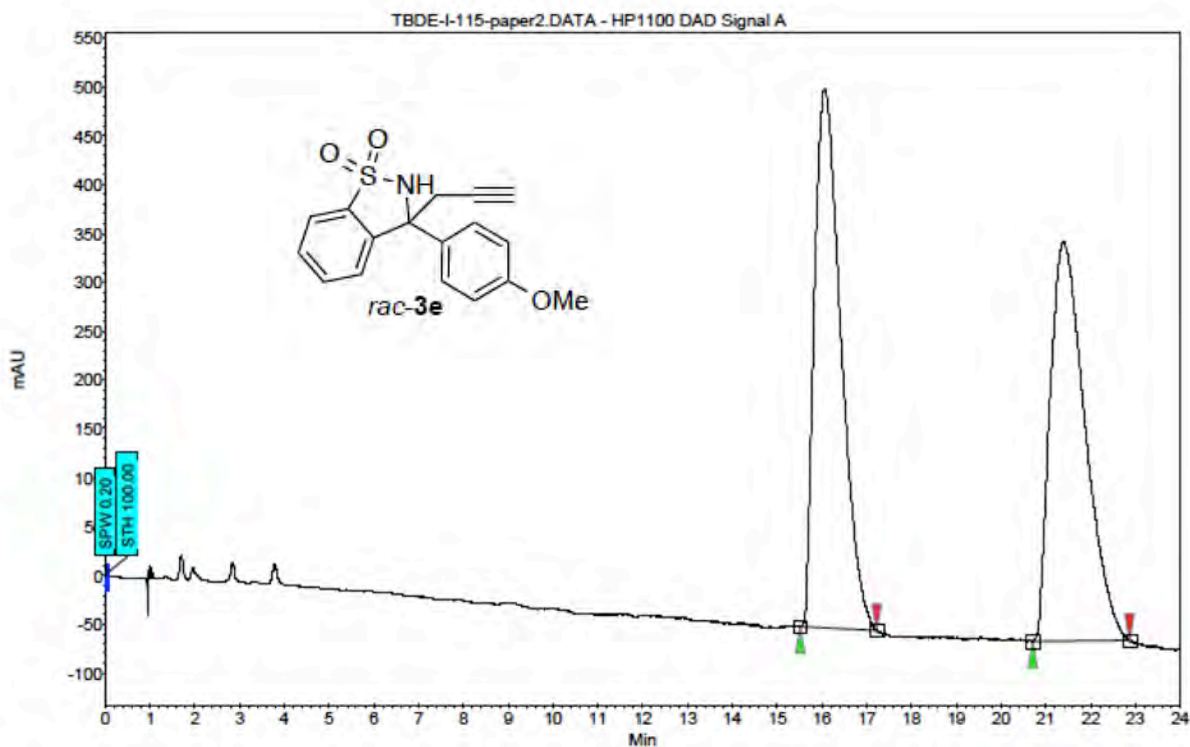

| Index | Name    | Start [Min] | Time [Min] | End [Min] | RT Offset [Min] | Quantity [% Area] | Height [μV] | Area [μV.Min] | Area [%] |
|-------|---------|-------------|------------|-----------|-----------------|-------------------|-------------|---------------|----------|
| 1     | UNKNOWN | 15.52       | 16.06      | 17.23     | 0.00            | 50.58             | 552.1       | 377.4         | 50.582   |
| 2     | UNKNOWN | 20.71       | 21.39      | 22.87     | 0.00            | 49.42             | 409.4       | 368.7         | 49.418   |
| Total |         |             |            |           |                 | 100.00            | 961.5       | 746.1         | 100.000  |

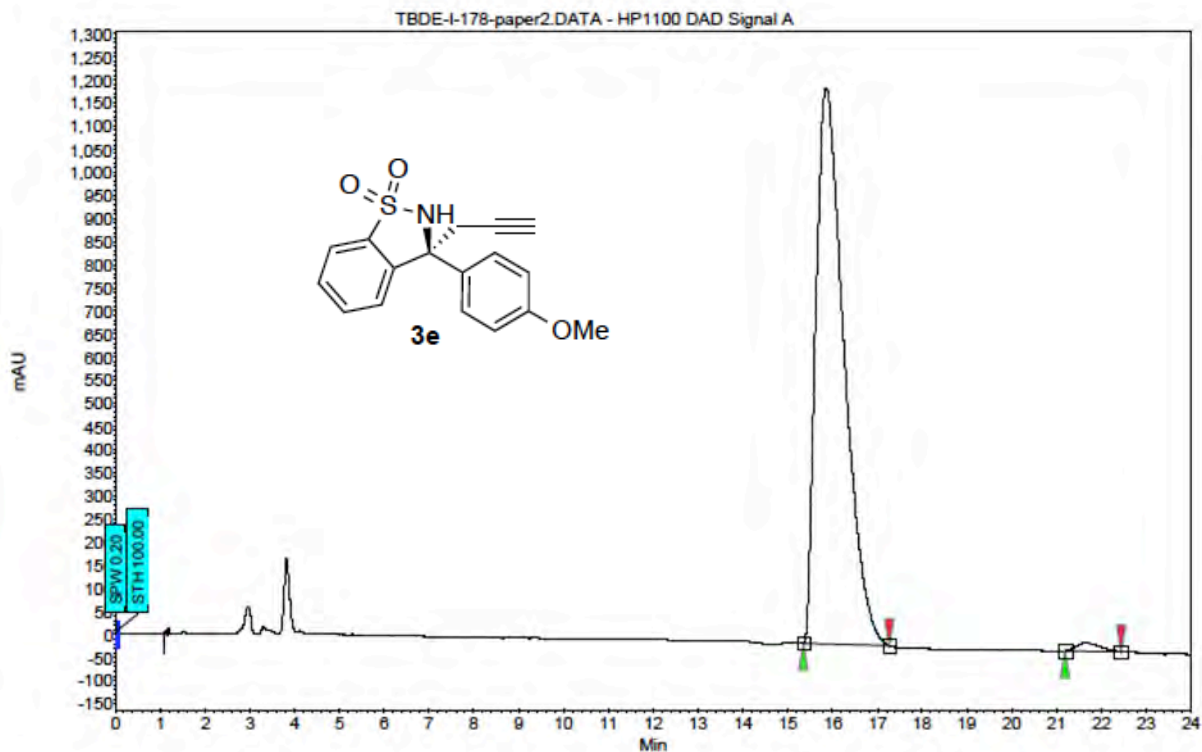

| Index | Name    | Start [Min] | Time [Min] | End [Min] | RT Offset [Min] | Quantity [% Area] | Height [μV] | Area [μV.Min] | Area [%] |
|-------|---------|-------------|------------|-----------|-----------------|-------------------|-------------|---------------|----------|
| 1     | UNKNOWN | 15.35       | 15.87      | 17.26     | 0.00            | 98.75             | 1202.6      | 870.4         | 98.747   |
| 2     | UNKNOWN | 21.19       | 21.68      | 22.44     | 0.00            | 1.25              | 17.8        | 11.0          | 1.253    |
| Total |         |             |            |           |                 | 100.00            | 1220.4      | 881.4         | 100.000  |

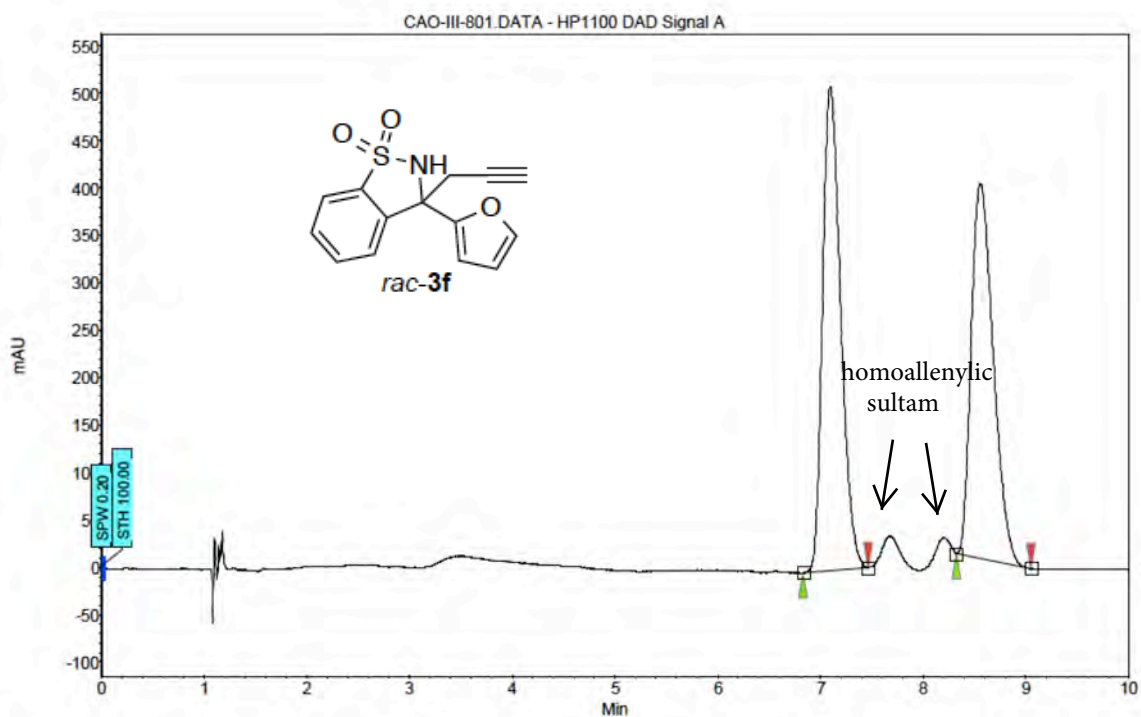

| Index | Name    | Start Time [Min] | End [Min] | RT Offset [Min] | Quantity [% Area] | Height [μV] | Area [μV.Min] | Area [%] |        |
|-------|---------|------------------|-----------|-----------------|-------------------|-------------|---------------|----------|--------|
| 1     | UNKNOWN | 6.83             | 7.09      | 7.46            | 0.00              | 51.48       | 510.0         | 104.0    | 51.480 |
| 2     | UNKNOWN | 8.32             | 8.55      | 9.05            | 0.00              | 48.52       | 395.3         | 98.0     | 48.520 |
| Total |         |                  |           |                 | 100.00            | 905.3       | 202.0         | 100.000  |        |

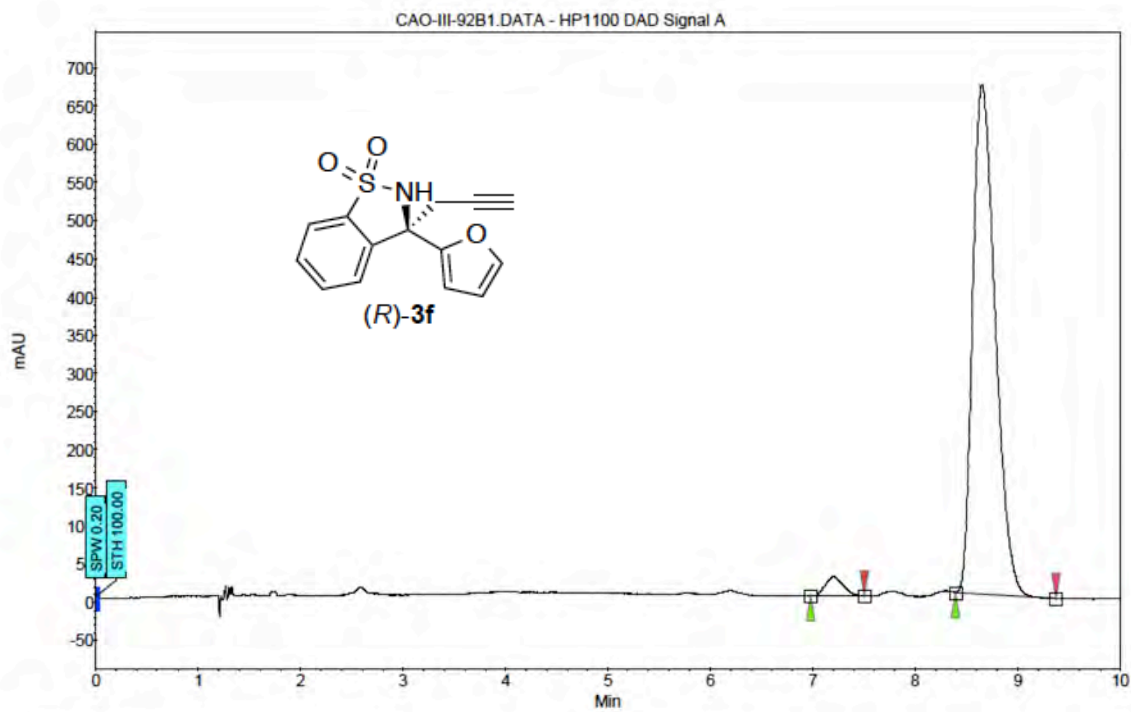

| Index | Name    | Start Time [Min] | End [Min] | RT Offset [Min] | Quantity [% Area] | Height [μV] | Area [μV.Min] | Area [%] |        |
|-------|---------|------------------|-----------|-----------------|-------------------|-------------|---------------|----------|--------|
| 1     | UNKNOWN | 6.98             | 7.20      | 7.50            | 0.00              | 2.78        | 24.7          | 4.9      | 2.778  |
| 2     | UNKNOWN | 8.39             | 8.65      | 9.37            | 0.00              | 97.22       | 667.3         | 170.0    | 97.222 |
| Total |         |                  |           |                 | 100.00            | 692.0       | 174.8         | 100.000  |        |

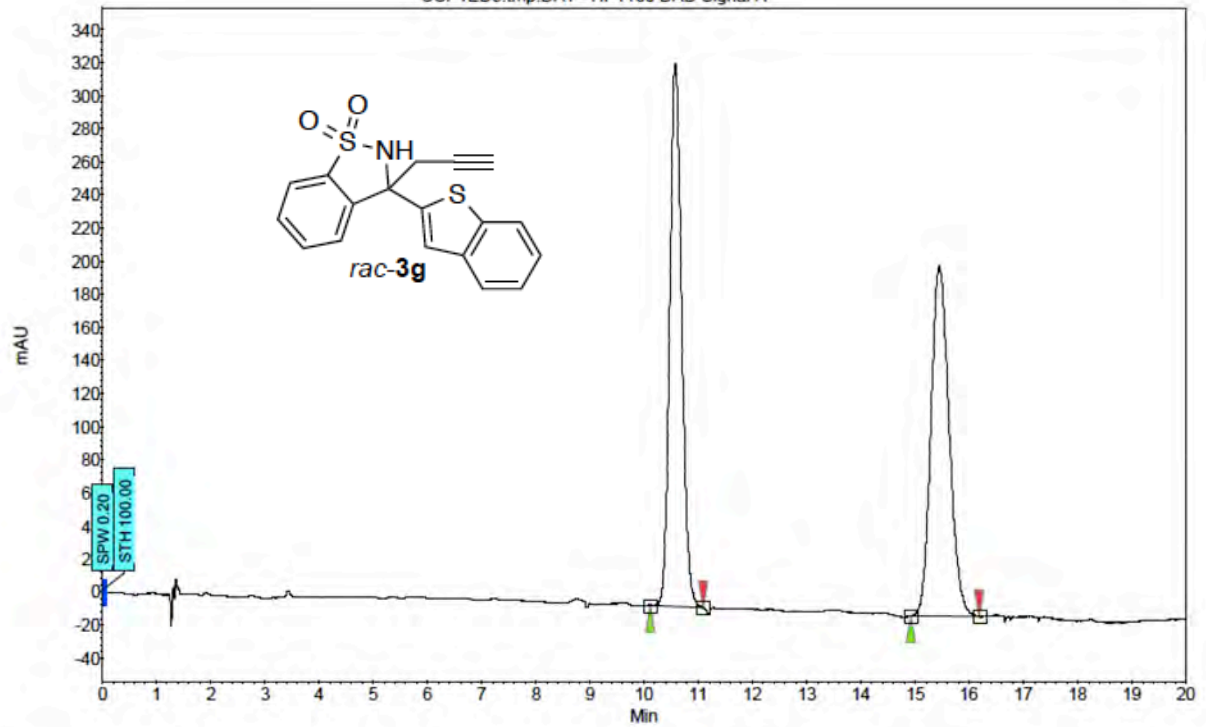

| Index | Name    | Start | Time  | End   | RT Offset | Quantity | Height     | Area           | Area    |
|-------|---------|-------|-------|-------|-----------|----------|------------|----------------|---------|
|       |         | [Min] | [Min] | [Min] | [Min]     | [% Area] | [ $\mu$ V] | [ $\mu$ V.Min] | [%]     |
| 1     | UNKNOWN | 10.12 | 10.58 | 11.09 | 0.00      | 50.44    | 328.0      | 83.7           | 50.437  |
| 2     | UNKNOWN | 14.92 | 15.45 | 16.18 | 0.00      | 49.56    | 211.6      | 82.3           | 49.563  |
| Total |         |       |       |       |           | 100.00   | 539.6      | 166.0          | 100.000 |

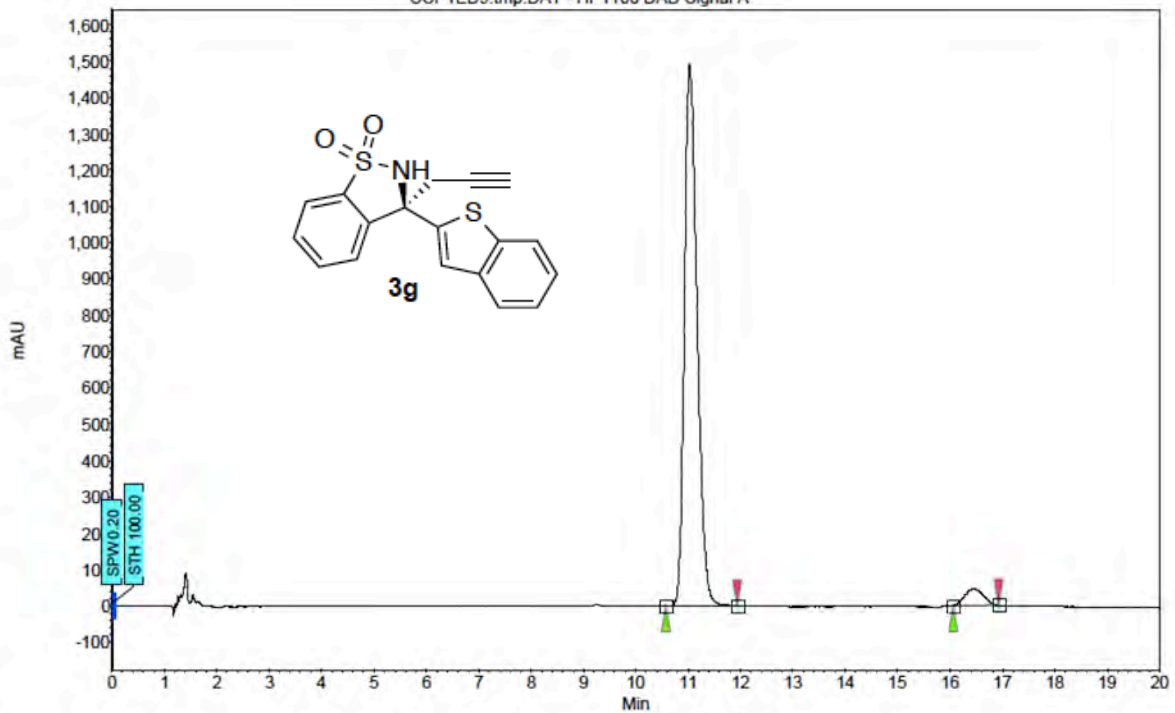

| Index | Name    | Start | Time  | End   | RT Offset | Quantity | Height     | Area           | Area    |
|-------|---------|-------|-------|-------|-----------|----------|------------|----------------|---------|
|       |         | [Min] | [Min] | [Min] | [Min]     | [% Area] | [ $\mu$ V] | [ $\mu$ V.Min] | [%]     |
| 1     | UNKNOWN | 10.57 | 11.03 | 11.94 | 0.00      | 95.62    | 1491.4     | 417.1          | 95.617  |
| 2     | UNKNOWN | 16.05 | 16.46 | 16.92 | 0.00      | 4.38     | 46.7       | 19.1           | 4.383   |
| Total |         |       |       |       |           | 100.00   | 1538.0     | 436.3          | 100.000 |

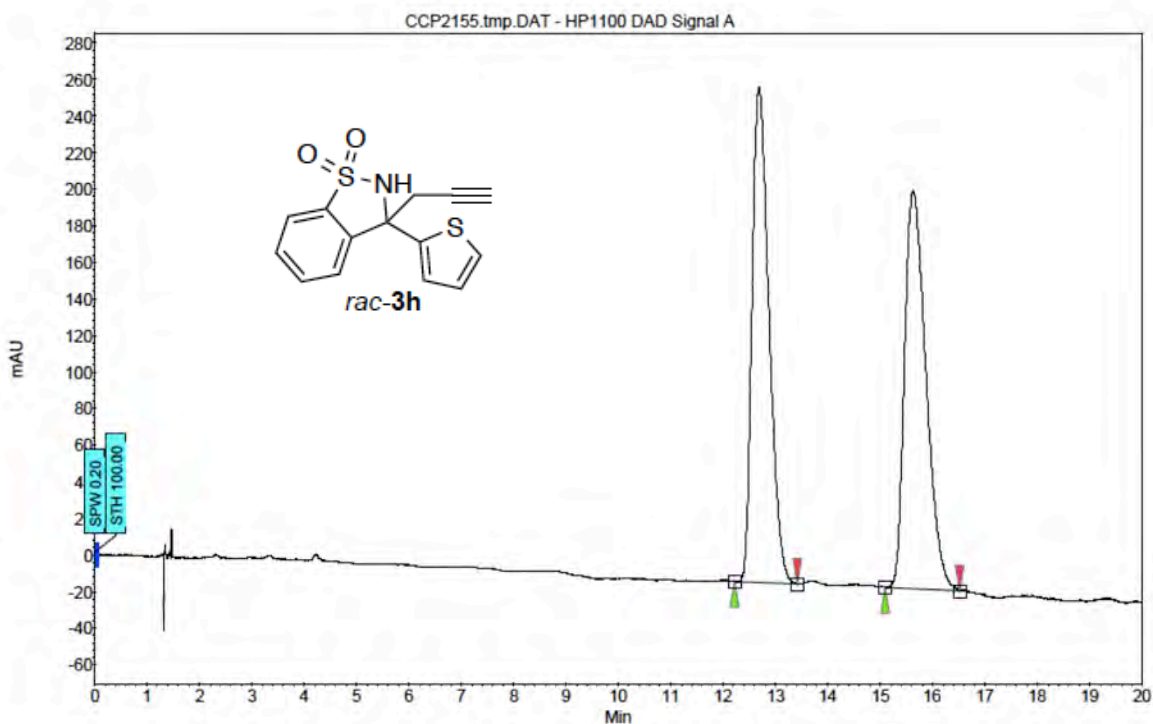

| Index | Name    | Start [Min] | Time [Min] | End [Min] | RT Offset [Min] | Quantity [% Area] | Height [μV] | Area [μV.Min] | Area [%] |
|-------|---------|-------------|------------|-----------|-----------------|-------------------|-------------|---------------|----------|
| 1     | UNKNOWN | 12.22       | 12.68      | 13.42     | 0.00            | 49.78             | 270.8       | 101.5         | 49.777   |
| 2     | UNKNOWN | 15.09       | 15.63      | 16.51     | 0.00            | 50.22             | 217.6       | 102.4         | 50.223   |
| Total |         |             |            |           |                 | 100.00            | 488.4       | 203.9         | 100.000  |

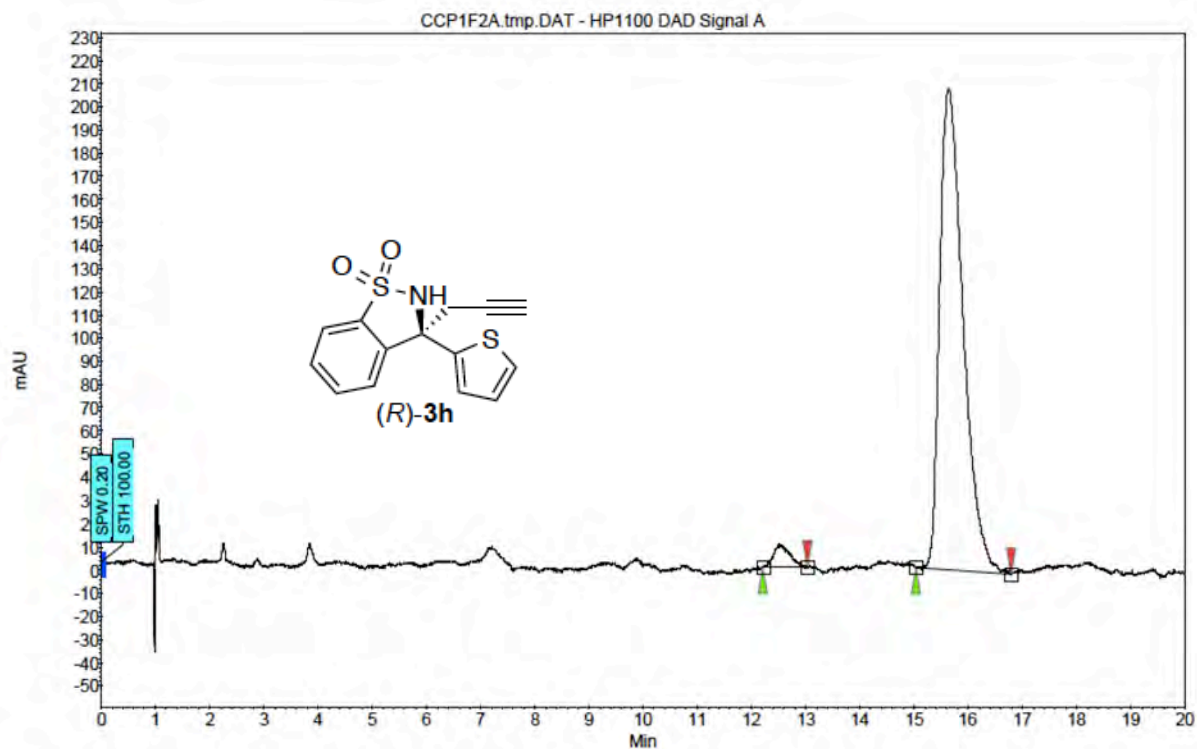

| Index | Name    | Start [Min] | Time [Min] | End [Min] | RT Offset [Min] | Quantity [% Area] | Height [μV] | Area [μV.Min] | Area [%] |
|-------|---------|-------------|------------|-----------|-----------------|-------------------|-------------|---------------|----------|
| 1     | UNKNOWN | 12.21       | 12.52      | 13.03     | 0.00            | 3.10              | 9.8         | 3.3           | 3.102    |
| 2     | UNKNOWN | 15.03       | 15.65      | 16.79     | 0.00            | 96.90             | 207.5       | 103.4         | 96.898   |
| Total |         |             |            |           |                 | 100.00            | 217.4       | 106.7         | 100.000  |

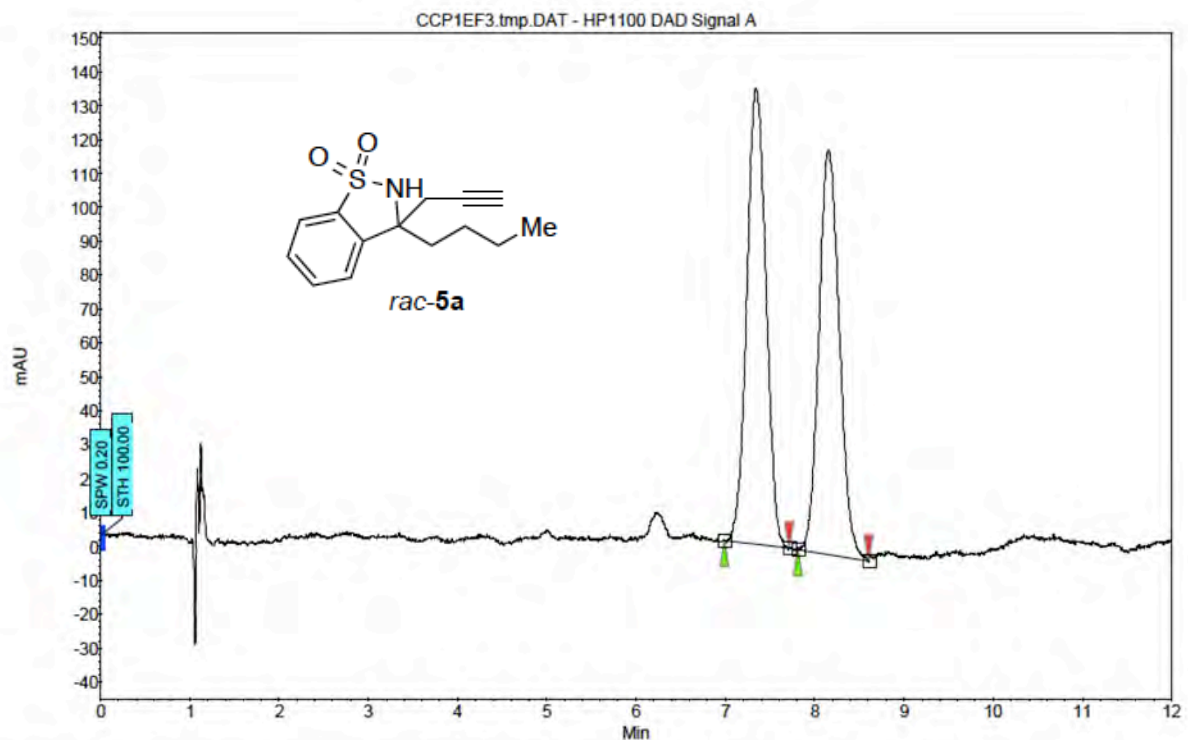

| Index | Name    | Start Time [Min] | End [Min] | RT Offset [Min] | Quantity [% Area] | Height [μV] | Area [μV.Min] | Area [%] |        |
|-------|---------|------------------|-----------|-----------------|-------------------|-------------|---------------|----------|--------|
| 1     | UNKNOWN | 6.99             | 7.34      | 7.72            | 0.00              | 51.18       | 134.7         | 33.3     | 51.180 |
| 2     | UNKNOWN | 7.81             | 8.15      | 8.61            | 0.00              | 48.82       | 119.6         | 31.7     | 48.820 |
| Total |         |                  |           |                 | 100.00            | 254.3       | 65.0          | 100.000  |        |

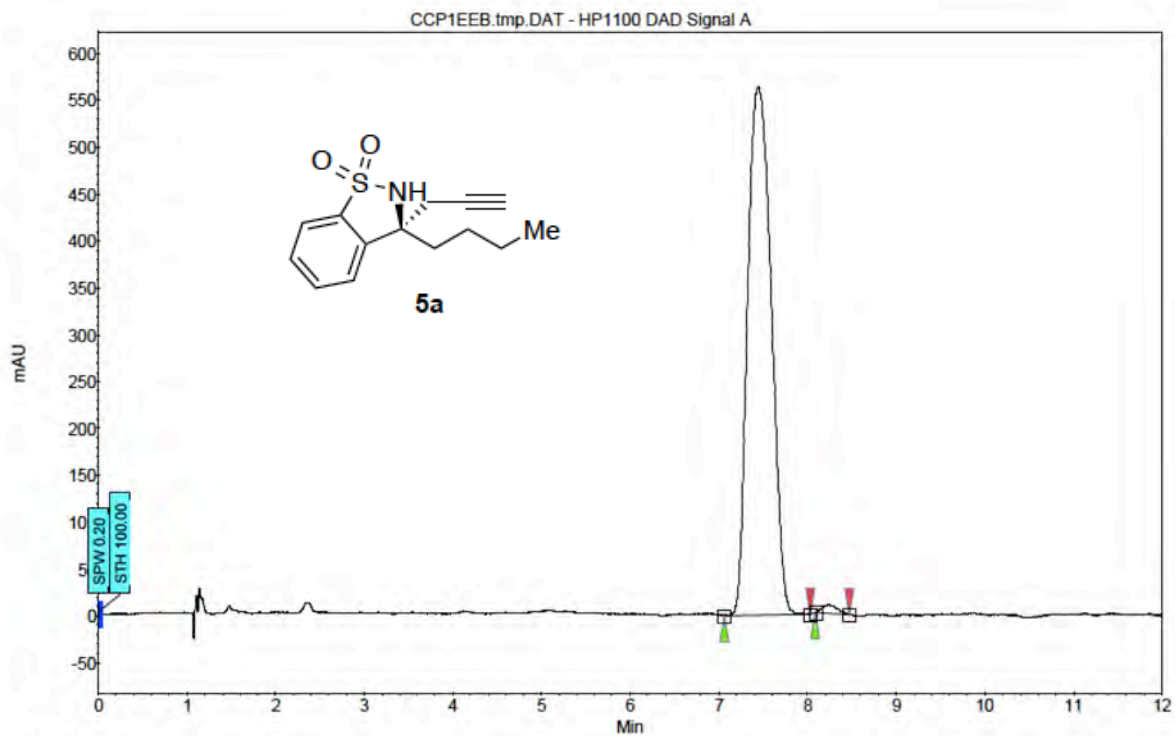

| Index | Name    | Start Time [Min] | End [Min] | RT Offset [Min] | Quantity [% Area] | Height [μV] | Area [μV.Min] | Area [%] |        |
|-------|---------|------------------|-----------|-----------------|-------------------|-------------|---------------|----------|--------|
| 1     | UNKNOWN | 7.06             | 7.45      | 8.03            | 0.00              | 98.96       | 563.5         | 172.9    | 98.965 |
| 2     | UNKNOWN | 8.09             | 8.26      | 8.47            | 0.00              | 1.04        | 9.5           | 1.8      | 1.035  |
| Total |         |                  |           |                 | 100.00            | 573.0       | 174.7         | 100.000  |        |

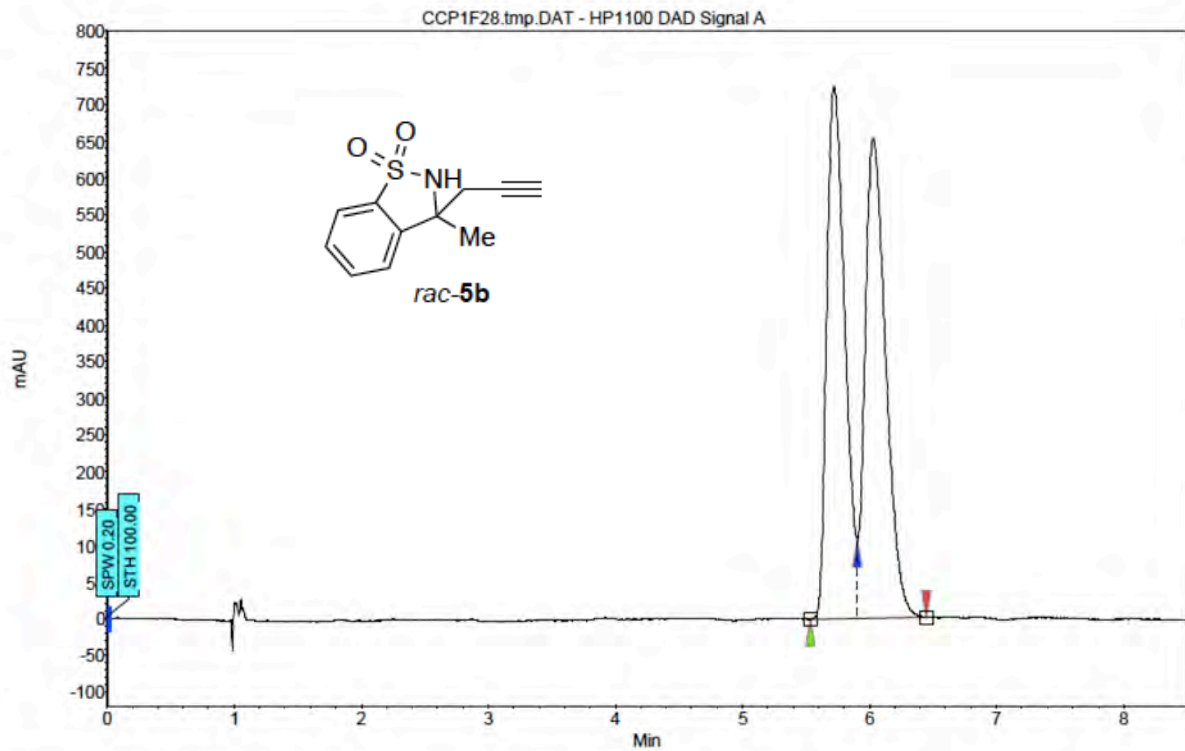

| Index | Name    | Start [Min] | Time [Min] | End [Min] | RT Offset [Min] | Quantity [% Area] | Height [μV] | Area [μV.Min] | Area [%] |
|-------|---------|-------------|------------|-----------|-----------------|-------------------|-------------|---------------|----------|
| 1     | UNKNOWN | 5.54        | 5.72       | 5.90      | 0.00            | 49.03             | 724.8       | 118.8         | 49.029   |
| 2     | UNKNOWN | 5.90        | 6.03       | 6.45      | 0.00            | 50.97             | 652.4       | 123.5         | 50.971   |
| Total |         |             |            |           |                 | 100.00            | 1377.2      | 242.4         | 100.000  |

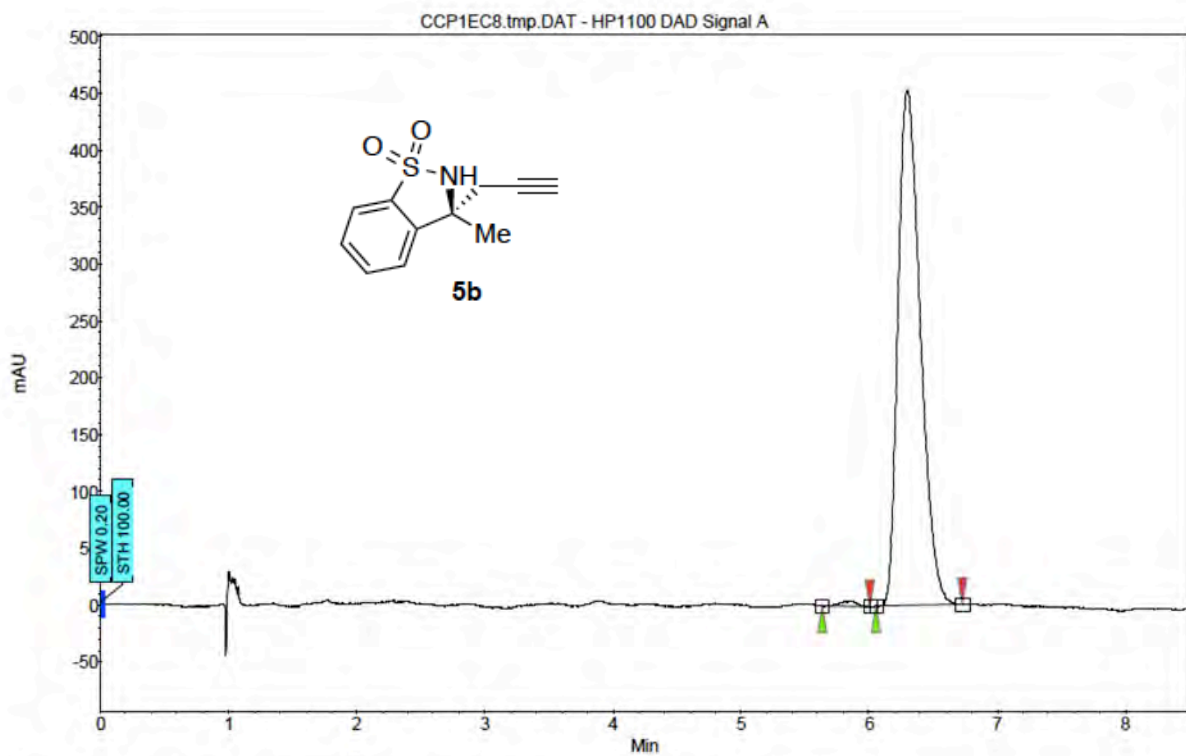

| Index | Name    | Start [Min] | Time [Min] | End [Min] | RT Offset [Min] | Quantity [% Area] | Height [μV] | Area [μV.Min] | Area [%] |
|-------|---------|-------------|------------|-----------|-----------------|-------------------|-------------|---------------|----------|
| 1     | UNKNOWN | 5.63        | 5.81       | 6.00      | 0.00            | 0.78              | 4.6         | 0.7           | 0.781    |
| 2     | UNKNOWN | 6.05        | 6.30       | 6.72      | 0.00            | 99.22             | 453.1       | 91.3          | 99.219   |
| Total |         |             |            |           |                 | 100.00            | 457.6       | 92.0          | 100.000  |

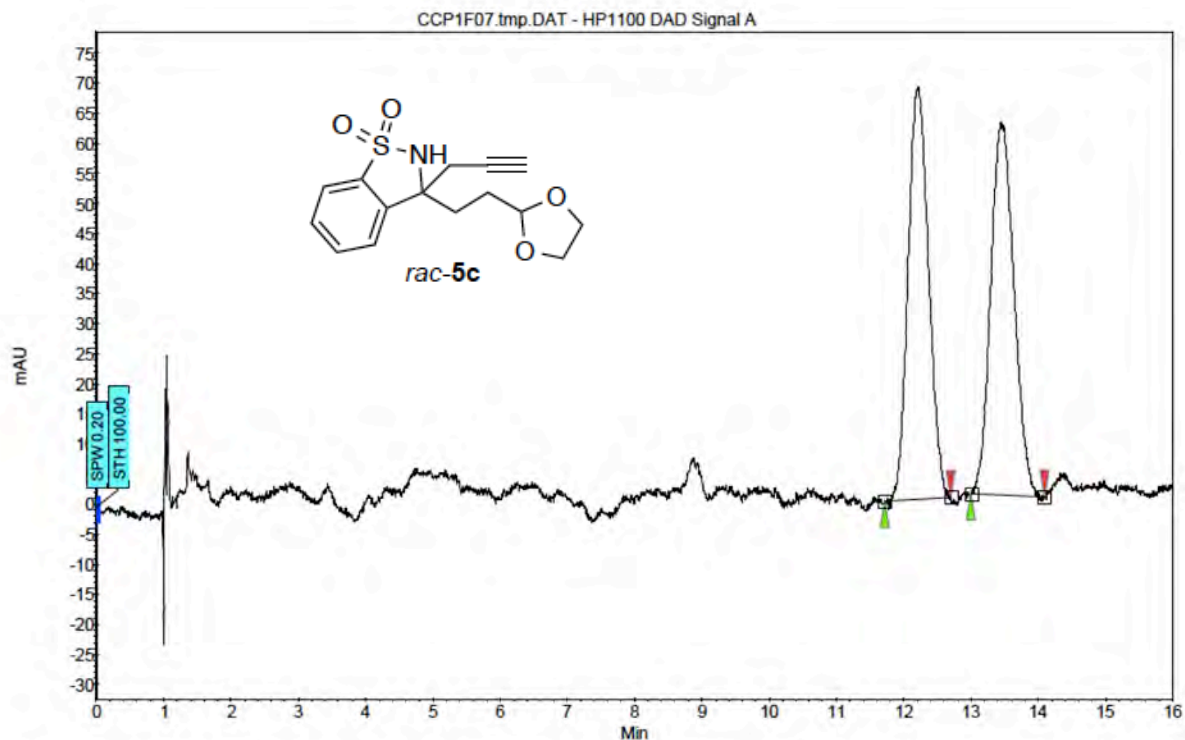

| Index | Name    | Start Time | End   | RT Offset | Quantity | Height   | Area  | Area     |
|-------|---------|------------|-------|-----------|----------|----------|-------|----------|
|       |         | [Min]      | [Min] | [Min]     | [Min]    | [% Area] | [μV]  | [μV.Min] |
| 1     | UNKNOWN | 11.72      | 12.21 | 12.69     | 0.00     | 49.61    | 68.6  | 24.2     |
| 2     | UNKNOWN | 13.00      | 13.45 | 14.09     | 0.00     | 50.39    | 62.0  | 24.6     |
| Total |         |            |       |           |          | 100.00   | 130.5 | 48.9     |

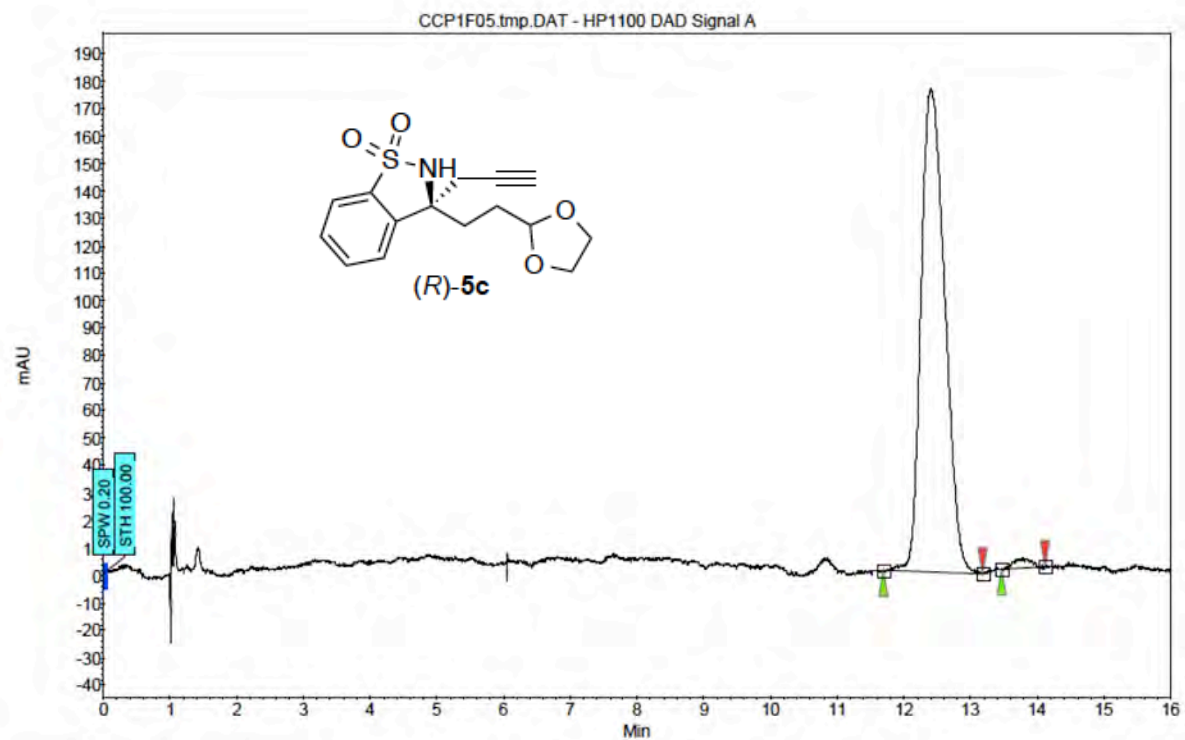

| Index | Name    | Start Time | End   | RT Offset | Quantity | Height   | Area  | Area     |
|-------|---------|------------|-------|-----------|----------|----------|-------|----------|
|       |         | [Min]      | [Min] | [Min]     | [Min]    | [% Area] | [μV]  | [μV.Min] |
| 1     | UNKNOWN | 11.69      | 12.41 | 13.18     | 0.00     | 98.62    | 176.3 | 72.6     |
| 2     | UNKNOWN | 13.47      | 13.78 | 14.11     | 0.00     | 1.38     | 3.5   | 1.0      |
| Total |         |            |       |           |          | 100.00   | 179.8 | 73.6     |



CAO-III-228B-RAC2.DATA - HP1100 DAD Signal A

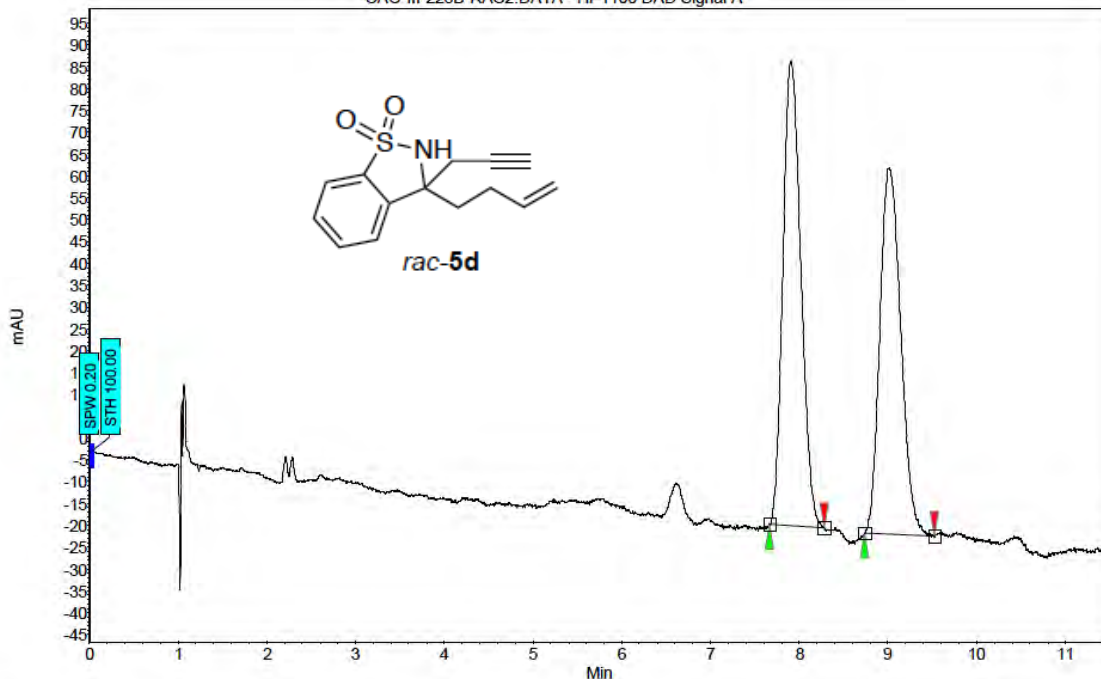

| Index | Name    | Start | Time  | End   | RT Offset | Quantity | Height     | Area           | Area    |
|-------|---------|-------|-------|-------|-----------|----------|------------|----------------|---------|
|       |         | [Min] | [Min] | [Min] | [Min]     | [% Area] | [ $\mu$ V] | [ $\mu$ V.Min] | [%]     |
| 1     | UNKNOWN | 7.66  | 7.91  | 8.28  | 0.00      | 52.12    | 106.2      | 24.9           | 52.119  |
| 2     | UNKNOWN | 8.73  | 9.02  | 9.52  | 0.00      | 47.88    | 84.0       | 22.9           | 47.881  |
| Total |         |       |       |       |           | 100.00   | 190.2      | 47.8           | 100.000 |

CAO-III-229B2.DATA - HP1100 DAD Signal A

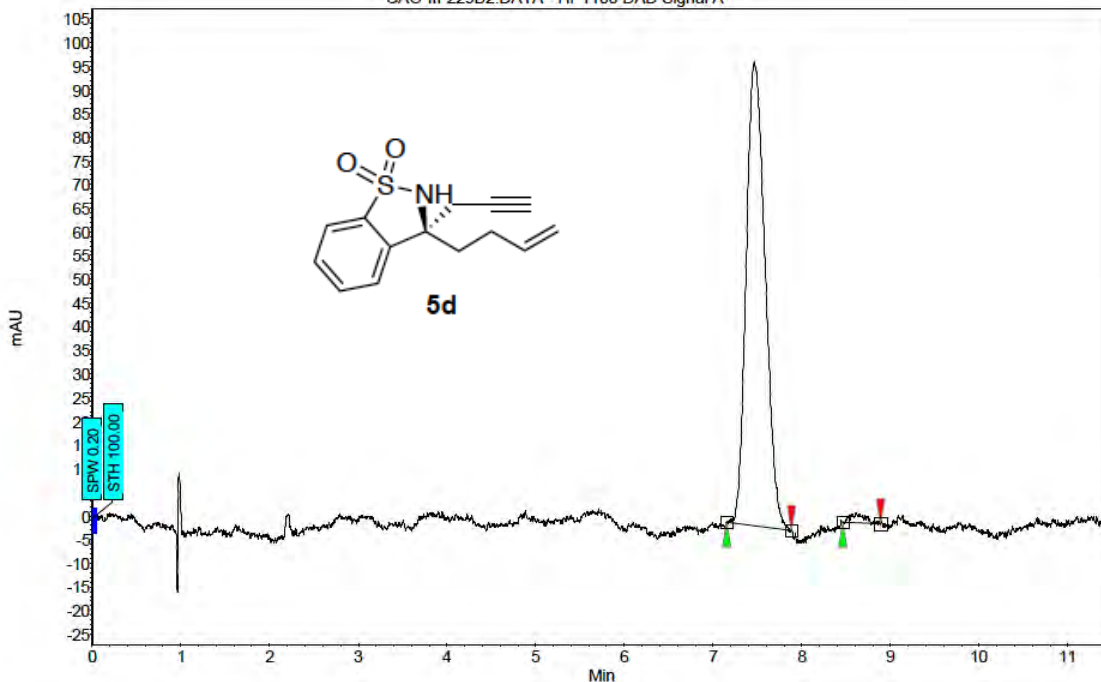

| Index | Name    | Start | Time  | End   | RT Offset | Quantity | Height     | Area           | Area    |
|-------|---------|-------|-------|-------|-----------|----------|------------|----------------|---------|
|       |         | [Min] | [Min] | [Min] | [Min]     | [% Area] | [ $\mu$ V] | [ $\mu$ V.Min] | [%]     |
| 1     | UNKNOWN | 7.15  | 7.46  | 7.88  | 0.00      | 98.46    | 98.0       | 24.1           | 98.463  |
| 2     | UNKNOWN | 8.46  | 8.62  | 8.89  | 0.00      | 1.54     | 2.3        | 0.4            | 1.537   |
| Total |         |       |       |       |           | 100.00   | 100.2      | 24.5           | 100.000 |

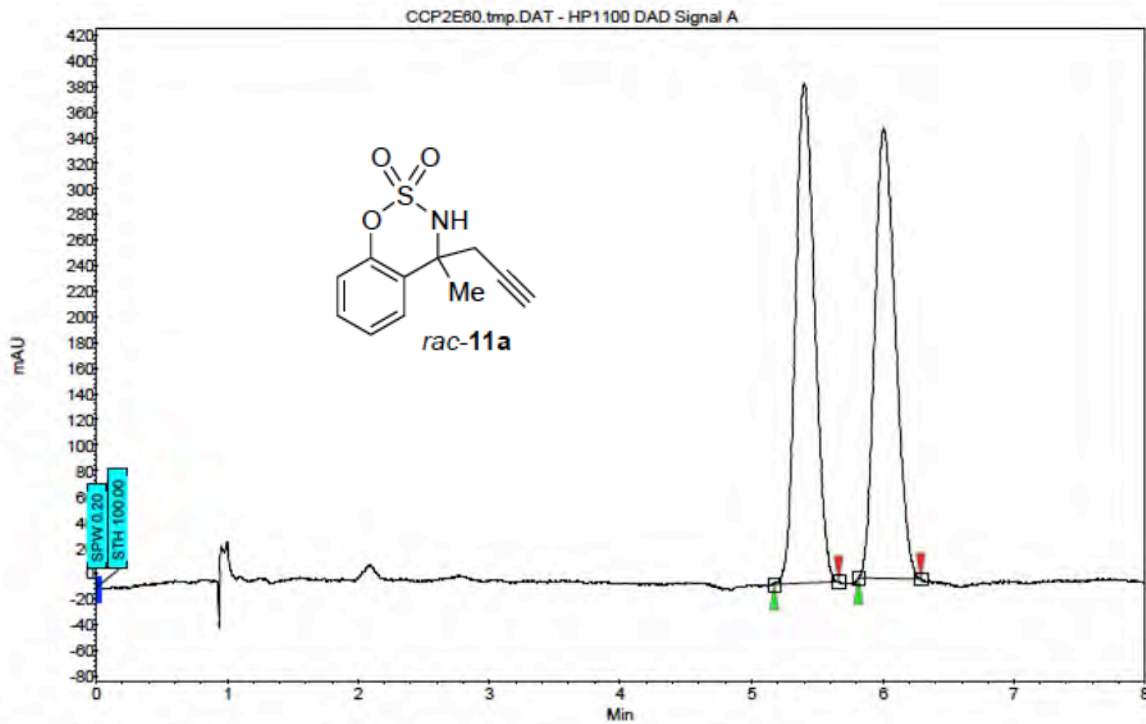

| Index | Name    | Start [Min] | Time [Min] | End [Min] | RT Offset [Min] | Quantity [% Area] | Height [μV] | Area [μV.Min] | Area [%] |
|-------|---------|-------------|------------|-----------|-----------------|-------------------|-------------|---------------|----------|
| 1     | UNKNOWN | 5.17        | 5.40       | 5.66      | 0.00            | 50.50             | 390.2       | 65.4          | 50.500   |
| 2     | UNKNOWN | 5.81        | 6.01       | 6.29      | 0.00            | 49.50             | 351.5       | 64.1          | 49.500   |
| Total |         |             |            |           |                 | 100.00            | 741.7       | 129.4         | 100.000  |

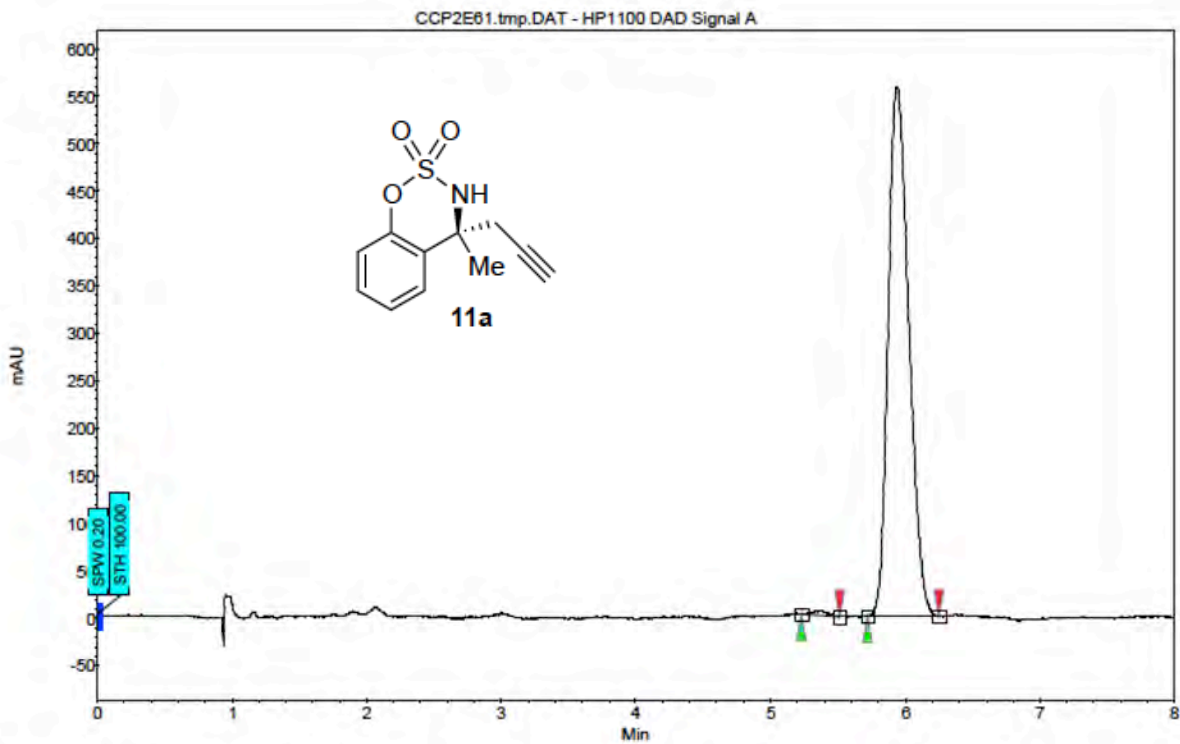

| Index | Name    | Start [Min] | Time [Min] | End [Min] | RT Offset [Min] | Quantity [% Area] | Height [μV] | Area [μV.Min] | Area [%] |
|-------|---------|-------------|------------|-----------|-----------------|-------------------|-------------|---------------|----------|
| 1     | UNKNOWN | 5.23        | 5.38       | 5.52      | 0.00            | 0.65              | 5.1         | 0.8           | 0.650    |
| 2     | UNKNOWN | 5.72        | 5.94       | 6.25      | 0.00            | 99.35             | 558.9       | 98.9          | 99.350   |
| Total |         |             |            |           |                 | 100.00            | 564.0       | 99.8          | 100.000  |

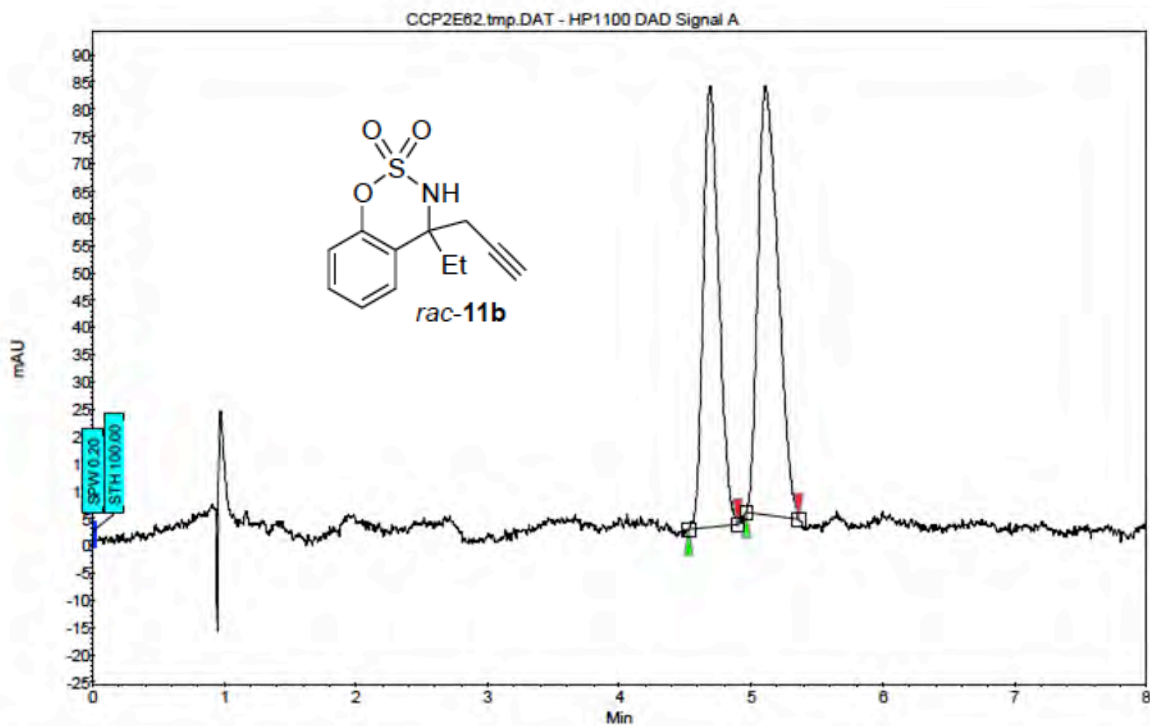

| Index | Name    | Start | Time  | End   | RT Offset | Quantity | Height     | Area           | Area    |
|-------|---------|-------|-------|-------|-----------|----------|------------|----------------|---------|
|       |         | [Min] | [Min] | [Min] | [Min]     | [% Area] | [ $\mu$ V] | [ $\mu$ V.Min] | [%]     |
| 1     | UNKNOWN | 4.53  | 4.69  | 4.90  | 0.00      | 44.36    | 80.8       | 11.1           | 44.362  |
| 2     | UNKNOWN | 4.97  | 5.11  | 5.36  | 0.00      | 55.64    | 78.7       | 13.9           | 55.638  |
| Total |         |       |       |       |           | 100.00   | 159.5      | 25.1           | 100.000 |

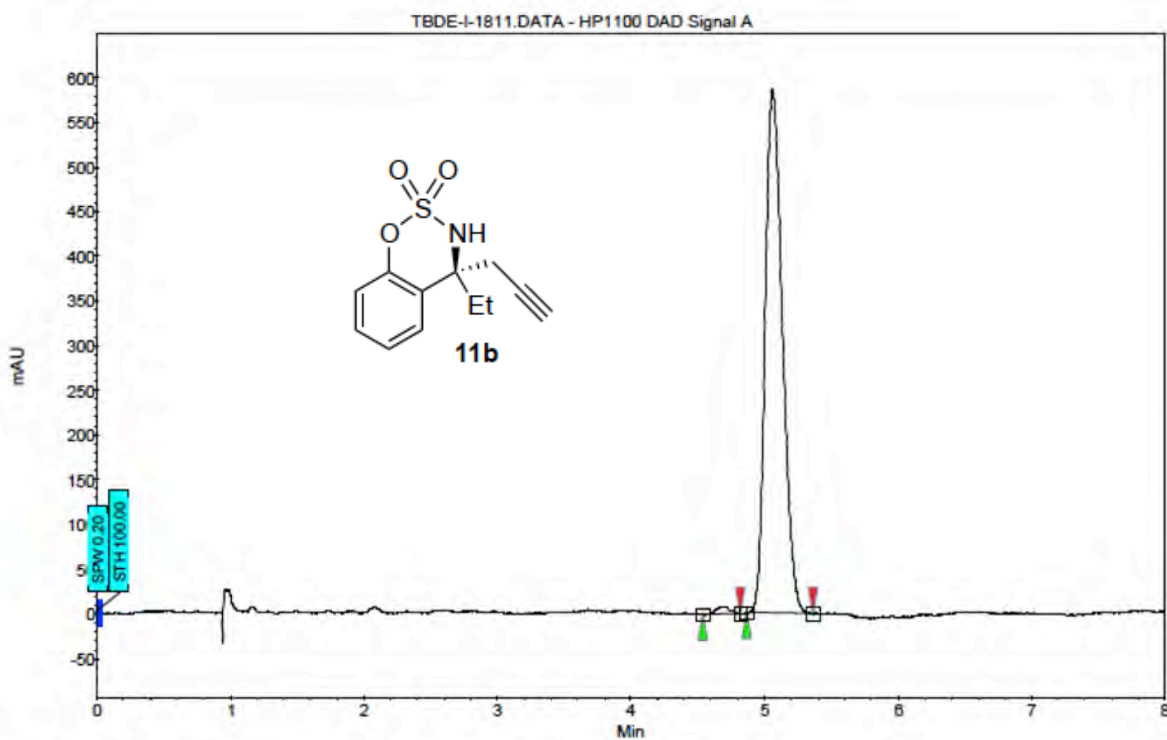

| Index | Name    | Start | Time  | End   | RT Offset | Quantity | Height     | Area           | Area    |
|-------|---------|-------|-------|-------|-----------|----------|------------|----------------|---------|
|       |         | [Min] | [Min] | [Min] | [Min]     | [% Area] | [ $\mu$ V] | [ $\mu$ V.Min] | [%]     |
| 1     | UNKNOWN | 4.54  | 4.68  | 4.82  | 0.00      | 0.96     | 7.7        | 0.8            | 0.956   |
| 2     | UNKNOWN | 4.87  | 5.06  | 5.36  | 0.00      | 99.04    | 586.0      | 87.2           | 99.044  |
| Total |         |       |       |       |           | 100.00   | 593.8      | 88.1           | 100.000 |

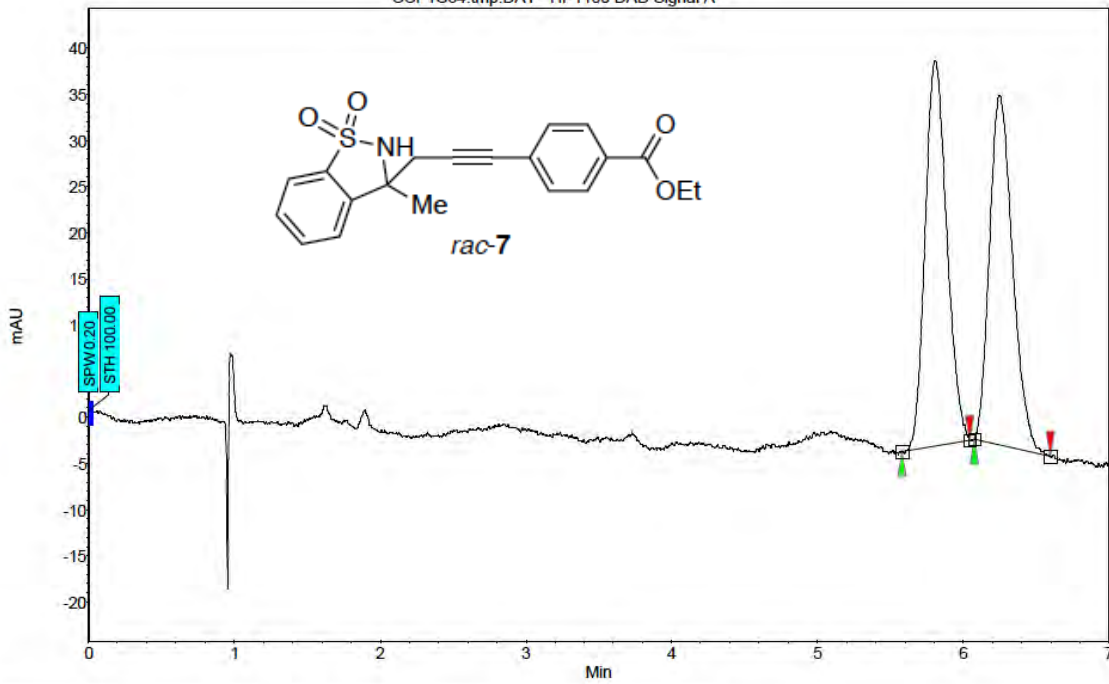

| Index | Name    | Start [Min] | Time [Min] | End [Min] | RT Offset [Min] | Quantity [% Area] | Height [μV] | Area [μV.Min] | Area [%] |
|-------|---------|-------------|------------|-----------|-----------------|-------------------|-------------|---------------|----------|
| 1     | UNKNOWN | 5.58        | 5.81       | 6.04      | 0.00            | 50.72             | 41.7        | 7.2           | 50.722   |
| 2     | UNKNOWN | 6.07        | 6.25       | 6.60      | 0.00            | 49.28             | 37.8        | 7.0           | 49.278   |
| Total |         |             |            |           |                 | 100.00            | 79.5        | 14.1          | 100.000  |

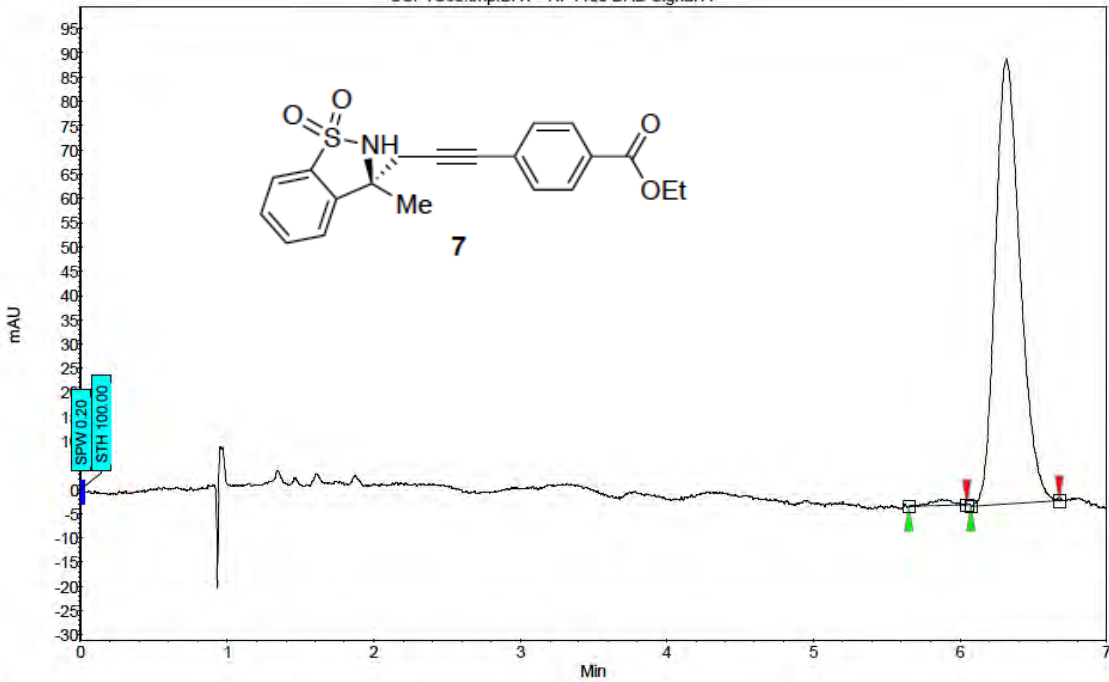

| Index | Name    | Start [Min] | Time [Min] | End [Min] | RT Offset [Min] | Quantity [% Area] | Height [μV] | Area [μV.Min] | Area [%] |
|-------|---------|-------------|------------|-----------|-----------------|-------------------|-------------|---------------|----------|
| 1     | UNKNOWN | 5.65        | 5.86       | 6.04      | 0.00            | 1.09              | 1.3         | 0.2           | 1.091    |
| 2     | UNKNOWN | 6.07        | 6.32       | 6.68      | 0.00            | 98.91             | 91.6        | 17.9          | 98.909   |
| Total |         |             |            |           |                 | 100.00            | 92.9        | 18.1          | 100.000  |

CAO-III-1331.DATA - HP1100 DAD Signal A

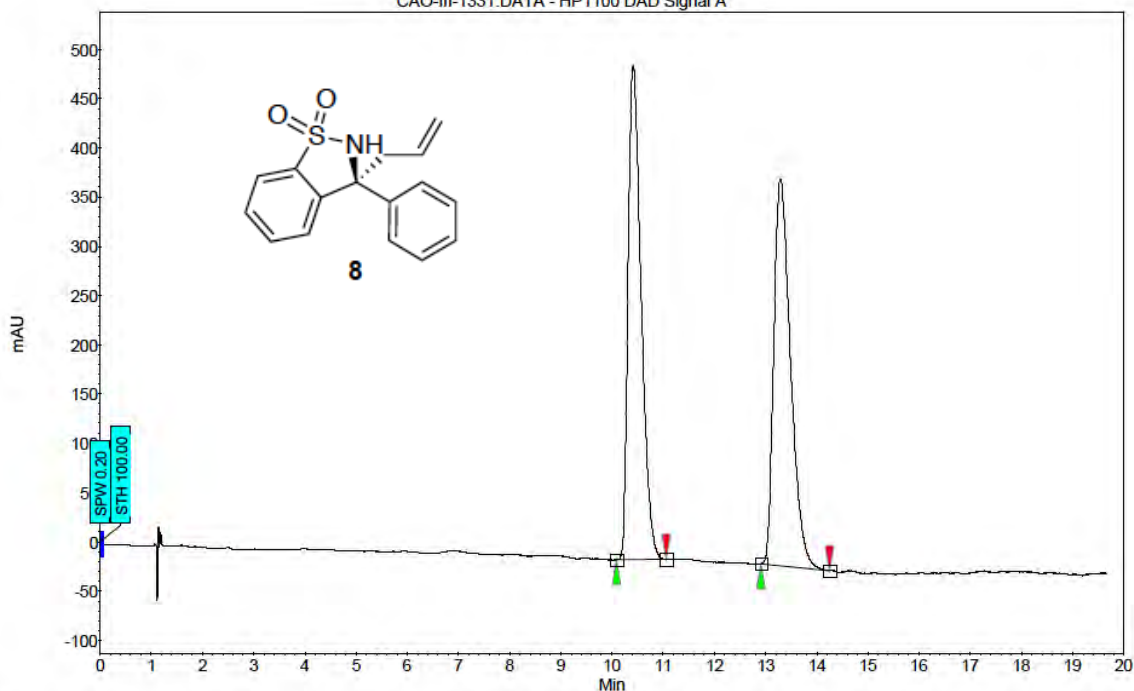

| Index | Name    | Start [Min] | Time [Min] | End [Min] | RT Offset [Min] | Quantity [% Area] | Height [µV] | Area [µV.Min] | Area [%] |
|-------|---------|-------------|------------|-----------|-----------------|-------------------|-------------|---------------|----------|
| 1     | UNKNOWN | 10.10       | 10.42      | 11.06     | 0.00            | 49.87             | 501.6       | 148.2         | 49.871   |
| 2     | UNKNOWN | 12.91       | 13.30      | 14.25     | 0.00            | 50.13             | 392.5       | 148.9         | 50.129   |
| Total |         |             |            |           |                 | 100.00            | 894.1       | 297.1         | 100.000  |

CAO-III-248C1.DATA - HP1100 DAD Signal A

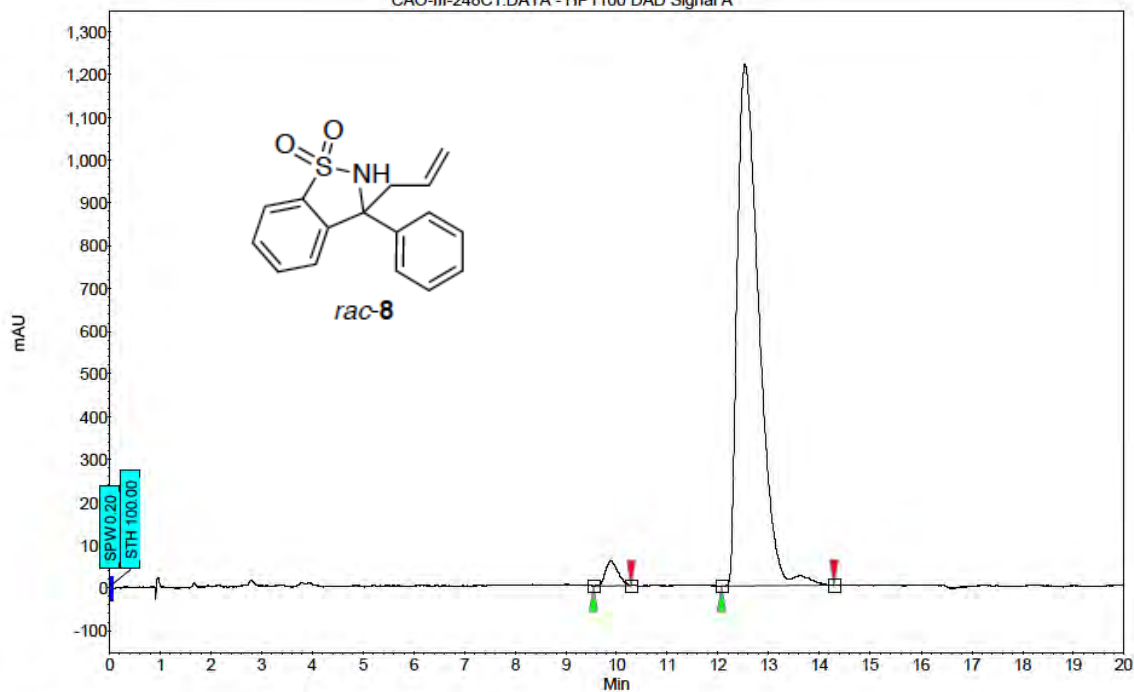

| Index | Name    | Start [Min] | Time [Min] | End [Min] | RT Offset [Min] | Quantity [% Area] | Height [µV] | Area [µV.Min] | Area [%] |
|-------|---------|-------------|------------|-----------|-----------------|-------------------|-------------|---------------|----------|
| 1     | UNKNOWN | 9.54        | 9.89       | 10.29     | 0.00            | 2.69              | 58.5        | 16.5          | 2.686    |
| 2     | UNKNOWN | 12.07       | 12.54      | 14.29     | 0.00            | 97.31             | 1217.8      | 598.1         | 97.314   |
| Total |         |             |            |           |                 | 100.00            | 1276.3      | 614.6         | 100.000  |

CAO-III-236-RAC1.DATA - HP1100 DAD Signal A

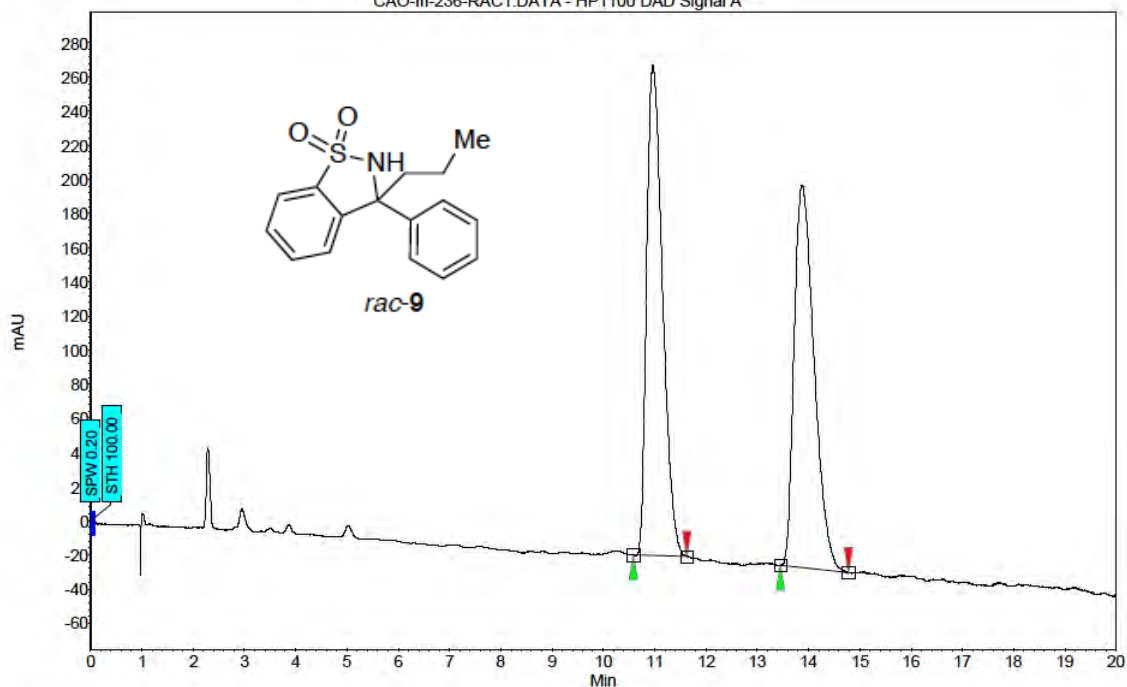

| Index | Name    | Start | Time  | End   | RT Offset | Quantity | Height     | Area           | Area    |
|-------|---------|-------|-------|-------|-----------|----------|------------|----------------|---------|
|       |         | [Min] | [Min] | [Min] | [Min]     | [% Area] | [ $\mu$ V] | [ $\mu$ V.Min] | [%]     |
| 1     | UNKNOWN | 10.59 | 10.97 | 11.63 | 0.00      | 50.35    | 287.2      | 102.7          | 50.353  |
| 2     | UNKNOWN | 13.46 | 13.88 | 14.78 | 0.00      | 49.65    | 224.0      | 101.3          | 49.647  |
| Total |         |       |       |       |           | 100.00   | 511.2      | 204.0          | 100.000 |

CAO-III-2531.DATA - HP1100 DAD Signal A

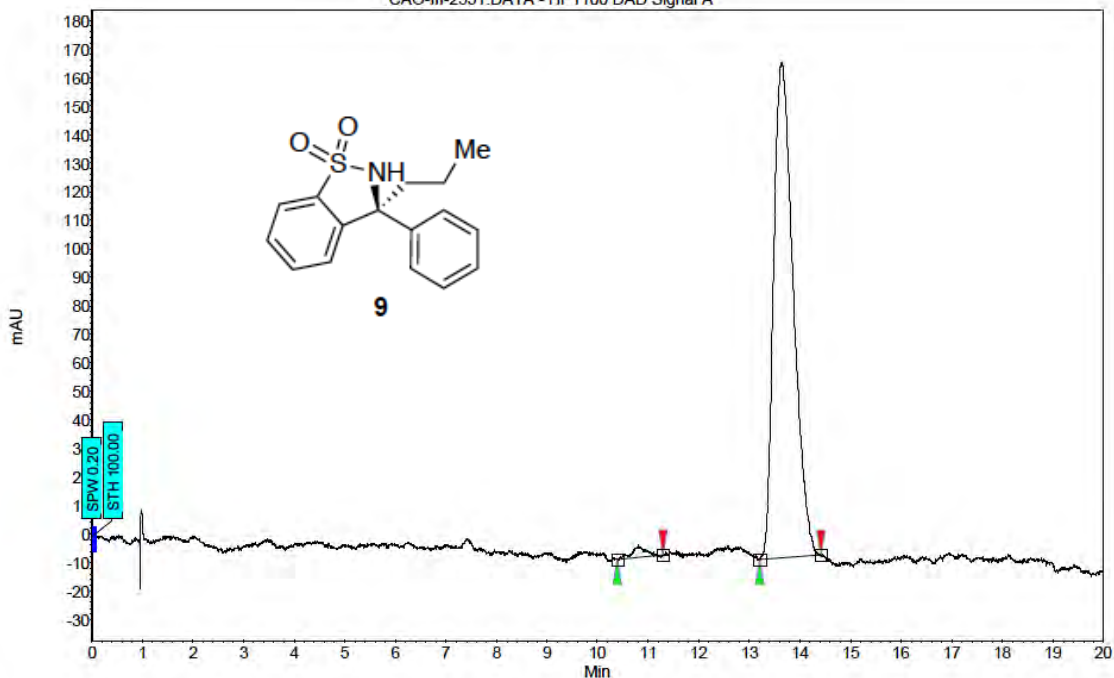

| Index | Name    | Start | Time  | End   | RT Offset | Quantity | Height     | Area           | Area    |
|-------|---------|-------|-------|-------|-----------|----------|------------|----------------|---------|
|       |         | [Min] | [Min] | [Min] | [Min]     | [% Area] | [ $\mu$ V] | [ $\mu$ V.Min] | [%]     |
| 1     | UNKNOWN | 10.39 | 10.81 | 11.29 | 0.00      | 1.46     | 4.4        | 1.2            | 1.464   |
| 2     | UNKNOWN | 13.20 | 13.63 | 14.41 | 0.00      | 98.54    | 173.5      | 77.9           | 98.536  |
| Total |         |       |       |       |           | 100.00   | 177.9      | 79.1           | 100.000 |

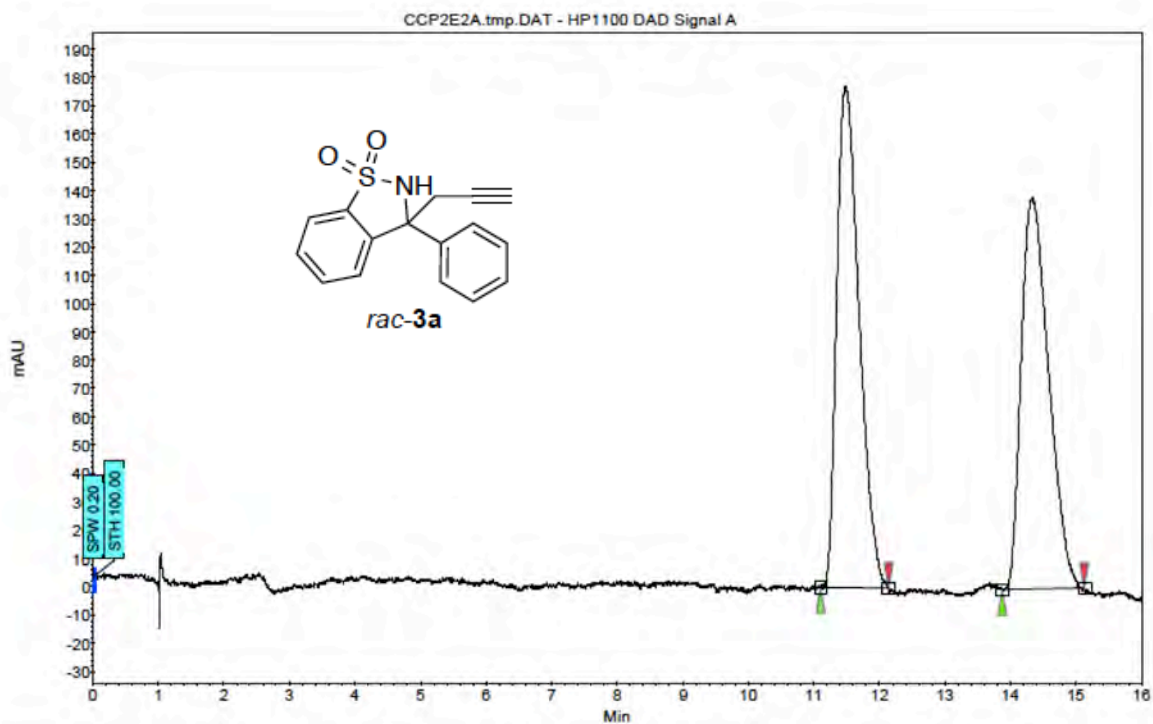

| Index | Name    | Start [Min] | Time [Min] | End [Min] | RT Offset [Min] | Quantity [% Area] | Height [μV] | Area [μV.Min] | Area [%] |
|-------|---------|-------------|------------|-----------|-----------------|-------------------|-------------|---------------|----------|
| 1     | UNKNOWN | 11.10       | 11.48      | 12.14     | 0.00            | 51.26             | 177.2       | 70.1          | 51.263   |
| 2     | UNKNOWN | 13.87       | 14.33      | 15.12     | 0.00            | 48.74             | 138.2       | 66.6          | 48.737   |
| Total |         |             |            |           |                 | 100.00            | 315.3       | 136.7         | 100.000  |

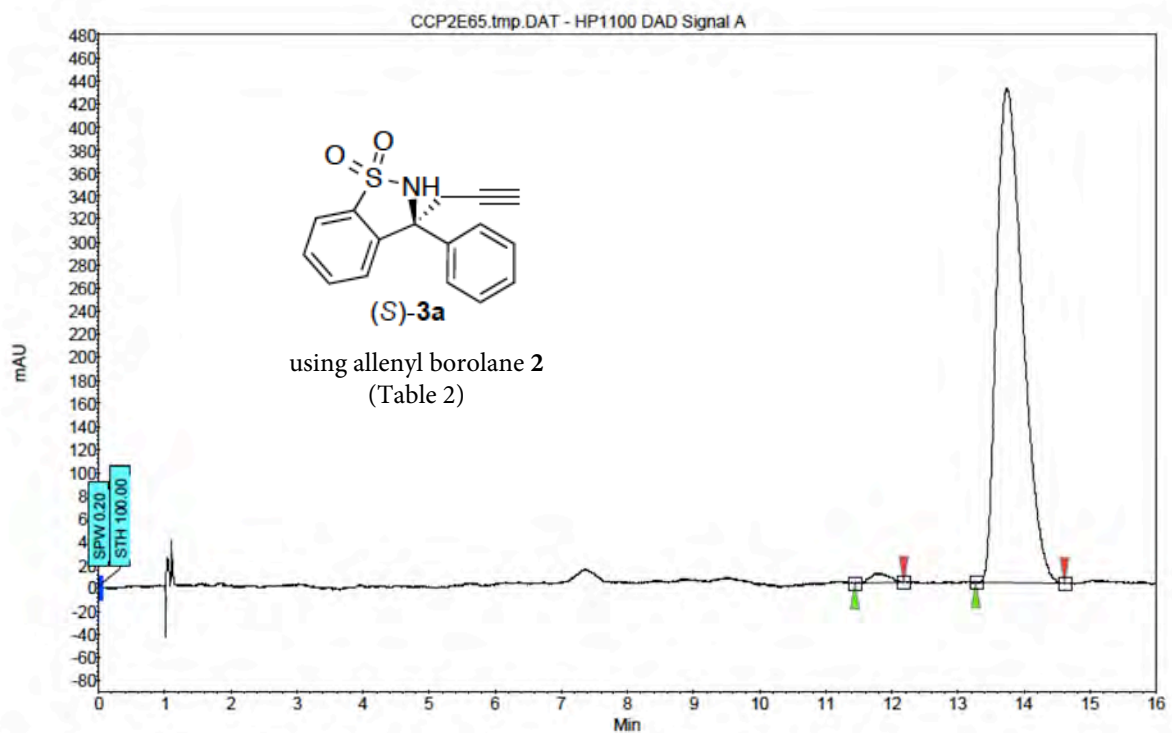

| Index | Name    | Start [Min] | Time [Min] | End [Min] | RT Offset [Min] | Quantity [% Area] | Height [μV] | Area [μV.Min] | Area [%] |
|-------|---------|-------------|------------|-----------|-----------------|-------------------|-------------|---------------|----------|
| 1     | UNKNOWN | 11.44       | 11.78      | 12.18     | 0.00            | 1.38              | 8.5         | 2.7           | 1.379    |
| 2     | UNKNOWN | 13.27       | 13.73      | 14.61     | 0.00            | 98.62             | 428.9       | 196.4         | 98.621   |
| Total |         |             |            |           |                 | 100.00            | 437.3       | 199.2         | 100.000  |

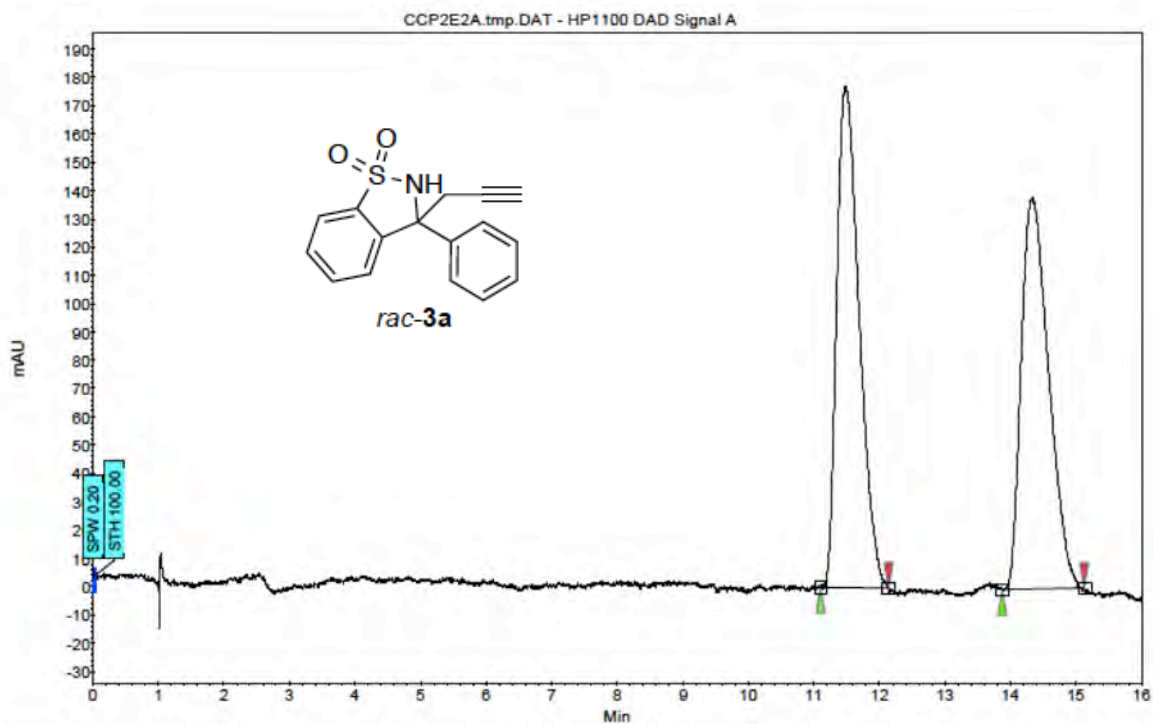

| Index | Name    | Start [Min] | Time [Min] | End [Min] | RT Offset [Min] | Quantity [% Area] | Height [μV] | Area [μV.Min] | Area [%] |
|-------|---------|-------------|------------|-----------|-----------------|-------------------|-------------|---------------|----------|
| 1     | UNKNOWN | 11.10       | 11.48      | 12.14     | 0.00            | 51.26             | 177.2       | 70.1          | 51.263   |
| 2     | UNKNOWN | 13.87       | 14.33      | 15.12     | 0.00            | 48.74             | 138.2       | 66.6          | 48.737   |
| Total |         |             |            |           |                 | 100.00            | 315.3       | 136.7         | 100.000  |

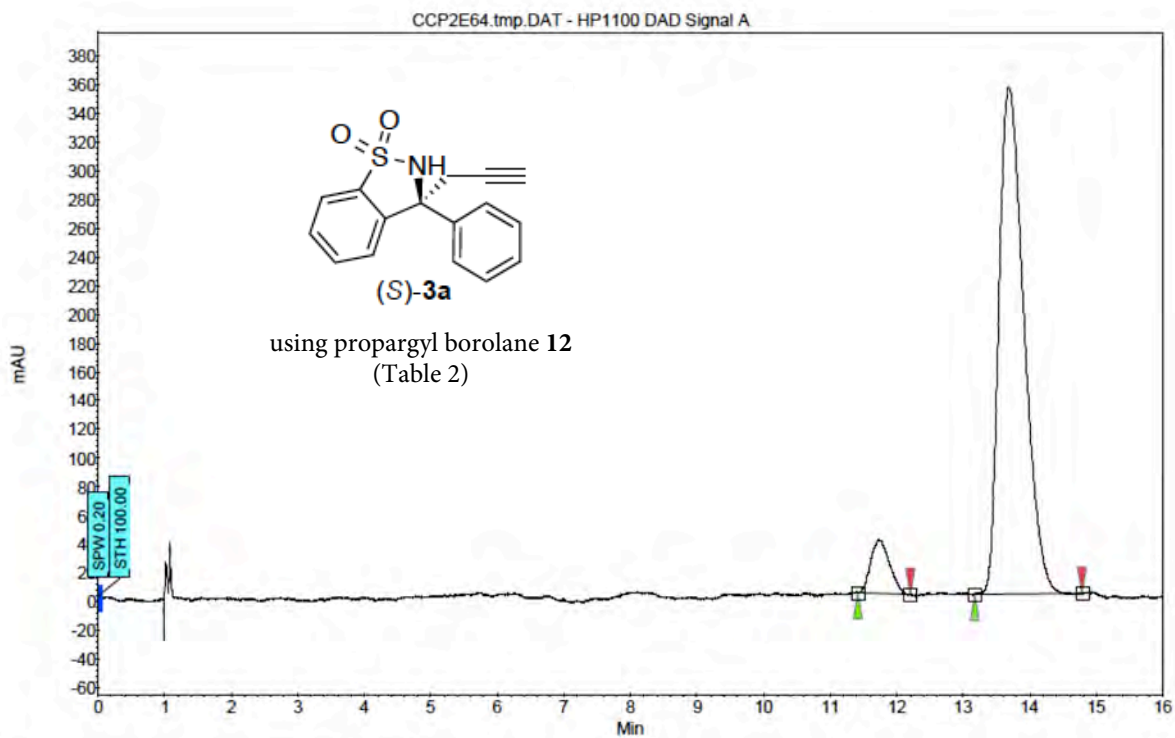

| Index | Name    | Start [Min] | Time [Min] | End [Min] | RT Offset [Min] | Quantity [% Area] | Height [μV] | Area [μV.Min] | Area [%] |
|-------|---------|-------------|------------|-----------|-----------------|-------------------|-------------|---------------|----------|
| 1     | UNKNOWN | 11.42       | 11.74      | 12.21     | 0.00            | 7.32              | 36.9        | 12.1          | 7.325    |
| 2     | UNKNOWN | 13.18       | 13.68      | 14.78     | 0.00            | 92.68             | 353.1       | 153.2         | 92.675   |
| Total |         |             |            |           |                 | 100.00            | 390.0       | 165.3         | 100.000  |
